# Supplementary material
Source: PubMed Central journal article supplement (PMC3342703)

Supplemental material for:

**Electronic Effects in the Pt-Catalyzed Cycloisomerization of Propargylic Esters: Synthesis of 2,3-Disubstituted Indolizines as a Mechanistic Probe**

Alison R. Hardin and Richmond Sarpong\*

*Department of Chemistry, University of California, Berkeley, California 94720*

*E-mail: rsarpong@berkeley.edu*

**Table of Contents**

|                                                |            |
|------------------------------------------------|------------|
| Materials and Methods                          | S2         |
| Experimental Procedures and Spectral Data      | S2 – S25   |
| <sup>1</sup> H and <sup>13</sup> C NMR Spectra | S26 – S101 |
| Cross Over Experiment                          | S102       |

## Experimental

### Materials and Methods

Unless otherwise stated, reactions were performed in flame-dried glassware fitted with rubber septa under a nitrogen atmosphere. Liquid reagents and solvents were transferred via syringe under nitrogen. THF was distilled over sodium/benzophenone ketyl; dichloromethane, benzene and toluene were distilled over calcium hydride. All other solvents were used as received unless otherwise noted. Reaction temperatures above 23 °C were controlled by an IKA<sup>®</sup> temperature modulator. Reactions were monitored by thin layer chromatography using SiliCycle silica gel 60 F254 precoated plates (0.25 mm) which were visualized using UV irradiation, anisaldehyde stain or KMnO<sub>4</sub> stain. SiliCycle Silica-P silica gel (particle size 40-63 μm) was used for flash chromatography. <sup>1</sup>H and <sup>13</sup>C NMR were recorded on Bruker AVB-400 or DRX-500 MHz spectrometers with <sup>13</sup>C operating frequencies of 100 and 125 MHz, respectively, in benzene-*d*<sub>6</sub> at 23 °C. Chemical shifts (δ) are reported in ppm relative to the residual solvent signal (δ = 7.15 for <sup>1</sup>H NMR and δ = 128.02 <sup>13</sup>C NMR). Data for <sup>1</sup>H NMR are reported as follows: chemical shift (multiplicity, coupling constant, number of hydrogens). Multiplicity is abbreviated as follows: s (singlet), d (doublet), t (triplet), q (quartet), m (multiplet). IR spectra were recorded on a Nicolet MAGNA-IR 850 spectrometer and are reported in frequency of absorption (cm<sup>-1</sup>). Mass spectral data were obtained from the Mass Spectral Facility at the University of California, Berkeley.

### Scheme S1

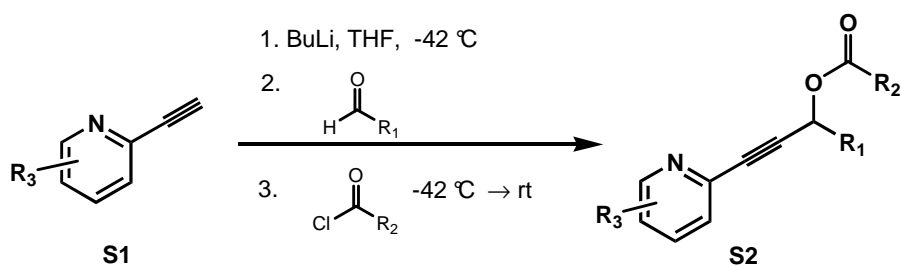

### Representative Procedure for the Synthesis of Substrates

A flame-dried, round-bottom flask was charged with anhydrous THF (50 mL) and 2-ethynylpyridine (490  $\mu$ L, 4.85 mmol). The solution was cooled to  $-42$   $^{\circ}$ C and BuLi (2.5 M in hexanes, 2.3 mL, 5.82 mmol) was added dropwise. The solution was allowed to stir at  $-42$   $^{\circ}$ C for 90 min, and then benzaldehyde (700  $\mu$ L, 6.79 mmol) was added dropwise to the reaction mixture. The mixture was stirred at  $-42$   $^{\circ}$ C for 2 h, then pivaloyl chloride (900  $\mu$ L, 7.28 mmol) was added dropwise. The mixture was stirred for an additional 45 min at this temperature, then allowed to warm to rt. After 3 h, saturated aqueous  $\text{NH}_4\text{Cl}$  solution (30 mL) was added slowly and stirring was continued for 10 min. The mixture was diluted with EtOAc (50 mL), and the aqueous layer was extracted with EtOAc (3 x 30 mL). The organic layers were combined, washed with brine (60 mL) and dried over  $\text{MgSO}_4$ . The solvent was removed under reduced pressure and the crude mixture was purified by flash chromatography (4:1 hexanes/EtOAc) to obtain a yellow crystalline solid (1.18 g, 83% yield).

### Spectral Data for Substrates

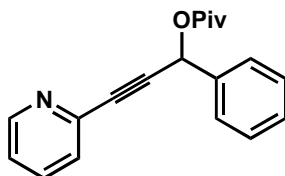

**1-Phenyl-3-(pyridin-2-yl)prop-2-ynyl pivalate (18b):** Yellow oil, 83% yield;  $R_f$  (3:1 hexanes/EtOAc) 0.24;  $^1\text{H NMR}$  (300 MHz,  $\text{C}_6\text{D}_6$ )  $\delta$  8.32 (d,  $J = 4.8$  Hz, 1H), 7.58 (dd,  $J = 7.9, 1.2$  Hz, 2H), 7.12-6.96 (m, 4H), 6.93 (s, 1H), 6.75 (dt,  $J = 7.8, 1.7$  Hz, 1H), 6.47-6.39 (m, 1H), 1.10 (s, 9H);  $^{13}\text{C NMR}$  (125 MHz,  $\text{C}_6\text{D}_6$ )  $\delta$  176.6, 150.3, 143.2, 137.7, 135.5, 129.0, 128.9, 128.3, 127.3, 123.0, 87.0, 85.9, 66.0, 38.8, 27.0; **IR** (film)  $\nu_{\text{max}}$  2974, 1734, 1583, 1464, 1428, 1275, 1138, 697  $\text{cm}^{-1}$ ; **MS** ( $\text{EI}^+$ ):  $m/z$  293 ( $\text{M}^+$ ); **HRMS** ( $\text{EI}^+$ ) calcd for  $[\text{C}_{19}\text{H}_{19}\text{NO}_2]^+$ :  $m/z$  293.1416, found 293.1411.

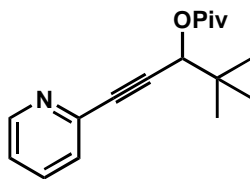

**4,4-Dimethyl-1-(pyridin-2-yl)pent-1-yn-3-yl pivalate (Table 2, entry 1):** Yellow oil, 69% yield;  $R_f$  (3:1 hexanes/EtOAc) 0.36;  $^1\text{H NMR}$  (400 MHz,  $\text{C}_6\text{D}_6$ )  $\delta$  8.32 (d,  $J = 4.14$  Hz, 1H), 7.02 (d,  $J = 7.8$  Hz, 1H), 6.77 (dt,  $J = 7.7, 1.8$  Hz, 1H), 6.44 (ddd,  $J = 7.6, 4.8, 1.1$  Hz, 1H), 5.58 (s, 1H), 1.16 (s, 9H), 1.03 (s, 9H);  $^{13}\text{C NMR}$  (100 MHz,  $\text{C}_6\text{D}_6$ )  $\delta$  176.6 150.2 143.4 135.5 128.3 127.3 122.8 85.9 72.0, 35.7, 27.2, 25.7; **IR** (film)  $\nu_{\text{max}}$  2971, 1735, 1583, 1464, 1428, 1278, 1147, 973, 780  $\text{cm}^{-1}$ ; **MS** ( $\text{EI}^+$ ):  $m/z$  273 ( $\text{M}^+$ ); **HRMS** ( $\text{EI}^+$ ) calcd for  $[\text{C}_{17}\text{H}_{23}\text{NO}_2]^+$ :  $m/z$  273.1729, found 273.1725.

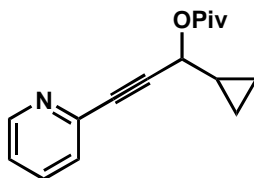

**1-Cyclopropyl-3-(pyridin-2-yl)prop-2-ynyl pivalate (Table 2, entry 2):** Yellow oil, 56% yield;  $R_f$  (3:1 hexanes/EtOAc) 0.33;  $^1\text{H NMR}$  (500 MHz,  $\text{C}_6\text{D}_6$ )  $\delta$  8.32 (d,  $J = 4.4$  Hz, 1H), 7.02 (d,  $J = 7.8$  Hz, 1H), 6.76 (dt,  $J = 7.7, 1.8$  Hz, 1H), 6.43 (ddd,  $J = 7.6, 4.8, 1.1$  Hz, 1H), 5.59 (d,  $J = 7.2$  Hz, 1H), 1.28-1.21 (m, 1H), 1.18 (s, 9H), 0.51-0.47 (m, 2H), 0.35-0.25 (m, 2H);  $^{13}\text{C NMR}$  (125 MHz,  $\text{C}_6\text{D}_6$ )  $\delta$  176.9, 150.3, 143.3, 135.5, 127.3, 122.8, 85.4, 67.6, 38.9, 27.2, 15.1, 3.7, 2.6; **IR** (film)  $\nu_{\text{max}}$  2974, 1731, 1582, 1464, 1429, 1278, 1148, 1031, 968, 780  $\text{cm}^{-1}$ ; **MS** ( $\text{FAB}^+$ ):  $m/z$  258 ( $\text{M}+\text{H}^+$ ); **HRMS** ( $\text{FAB}^+$ ) calcd for  $[\text{C}_{16}\text{H}_{20}\text{NO}_2]^+$  ( $\text{M}+\text{H}^+$ ):  $m/z$  258.1494, found 258.1487.

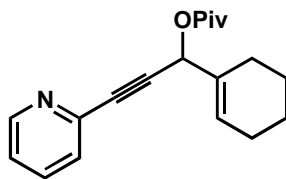

**1-Cyclohexenyl-30(pyridine-2-yl)prop-2-ynyl pivalate (Table 2, entry 3):** Yellow oil, 72% yield;  $R_f$  (3:1 hexanes/EtOAc) 0.28;  $^1\text{H NMR}$  (400 MHz,  $\text{C}_6\text{D}_6$ )  $\delta$  8.36-8.32 (m, 1H), 7.04 (td,  $J = 7.8, 1.0$  Hz, 1H), 6.75 (dt,  $J = 7.8, 1.8$  Hz, 1H), 6.42 (ddd,  $J = 7.6, 4.9, 1.2$  Hz, 1H), 6.34 (s, 1H), 6.04 (d,  $J = 1.0$  Hz, 1H), 2.42-2.01 (m, 2H), 1.86-1.73 (m, 2H), 1.54-1.41 (m, 2H), 1.39-1.27 (m, 2H), 1.16 (s, 9H);  $^{13}\text{C NMR}$  (100 MHz,  $\text{C}_6\text{D}_6$ )  $\delta$  176.6, 150.2, 143.4, 135.5, 133.7, 127.3, 122.8, 86.2, 85.8, 68.2, 39.0, 27.3, 27.2, 25.2, 24.9, 22.7, 22.3; **IR** (film)  $\nu_{\text{max}}$  2932, 1733, 1582, 1463, 1428, 1274, 1143, 1030, 779  $\text{cm}^{-1}$ ; **MS** ( $\text{EI}^+$ ):  $m/z$  297 ( $\text{M}^+$ ); **HRMS** ( $\text{EI}^+$ ) calcd for  $[\text{C}_{19}\text{H}_{23}\text{NO}_2]^+$ :  $m/z$  297.1729, found 297.1733.

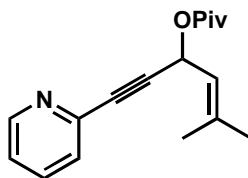

**5-Methyl-1-(pyridine-2-yl)hex-4-en-1-yn-3-yl pivalate (Table 2, entry 4):** Yellow oil, 82% yield;  $R_f$  (3:1 hexanes/EtOAc) 0.40;  $^1\text{H NMR}$  (400 MHz,  $\text{C}_6\text{D}_6$ )  $\delta$  8.33 (dd,  $J = 4.8, 0.7$  Hz, 1H), 7.06 (d,  $J = 7.8$  Hz, 1H), 6.76 (dt,  $J = 7.7, 1.8$  Hz, 1H), 6.63 (d,  $J = 9.0$  Hz, 1H), 6.43 (ddd,  $J = 7.6, 4.8, 1.1$  Hz, 1H), 5.58-5.53 (m, 1H), 1.54 (d,  $J = 1.2$  Hz, 3H), 1.41 (d,  $J = 1.2$  Hz, 3H), 1.16 (s, 9H);  $^{13}\text{C NMR}$  (100 MHz,  $\text{C}_6\text{D}_6$ )  $\delta$  176.7, 150.3, 143.5, 139.3, 135.5, 127.3, 122.8, 121.2, 86.8, 85.2, 61.6, 38.9, 27.2, 25.5, 18.2; **IR** (film)  $\nu_{\text{max}}$  2973, 1730, 1582, 1463, 1428, 1275, 1145, 924, 778  $\text{cm}^{-1}$ ; **MS** ( $\text{EI}^+$ ):  $m/z$  271 ( $\text{M}^+$ ); **HRMS** ( $\text{EI}^+$ ) calcd for  $[\text{C}_{17}\text{H}_{21}\text{NO}_2]^+$ :  $m/z$  271.1572, found 271.1573.

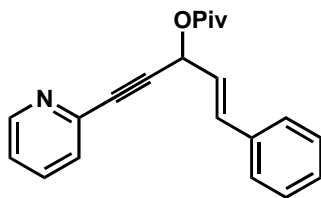

**(E)-5-Phenyl-1-(pyridin-2-yl)pent-4-en-1-yn-3-yl pivalate (Table 2, entry 5):** Yellow oil, 56% yield;  $R_f$  (3:1 hexanes/EtOAc) 0.36;  $^1\text{H NMR}$  (500 MHz,  $\text{C}_6\text{D}_6$ )  $\delta$  8.34 (d,  $J = 4.2$  Hz, 1H), 7.11-7.05 (m, 3H), 7.04-6.97 (m, 3H), 6.87 (d,  $J = 15.7$  Hz, 1H), 6.77 (dt,  $J = 7.7, 1.8$  Hz, 1H), 6.48 (dd,  $J = 6.7, 0.9$  Hz, 1H), 6.44 (ddd,  $J = 7.6, 4.8, 1.0$  Hz, 1H), 6.29 (dd,  $J = 15.8, 6.7$  Hz, 1H), 1.17 (s, 9H);  $^{13}\text{C NMR}$  (125 MHz,  $\text{C}_6\text{D}_6$ )  $\delta$  176.7, 150.4, 143.3, 136.2, 135.5, 135.1, 128.7, 128.5, 128.3, 127.3, 124.1, 123.0, 86.9, 85.2, 64.9, 38.9, 27.1; **IR** (film)  $\nu_{\text{max}}$  2973, 1732, 1582, 1464, 1428, 1273, 1140, 965, 779, 693  $\text{cm}^{-1}$ ; **MS** ( $\text{EI}^+$ ):  $m/z$  319 ( $\text{M}^+$ ); **HRMS** ( $\text{EI}^+$ ) calcd for  $[\text{C}_{21}\text{H}_{21}\text{NO}_2]^+$ :  $m/z$  319.1572, found 319.1573.

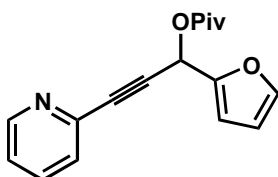

**1-(Furan-2-yl)-3-(pyridin-2-yl)prop-2-ynyl pivalate (Table 2, entry 6):** Orange oil, 70% yield;  $R_f$  (3:1 hexanes/EtOAc) 0.23;  $^1\text{H NMR}$  (400 MHz,  $\text{C}_6\text{D}_6$ )  $\delta$  8.32 (d,  $J = 4.2$  Hz, 1H), 7.04-6.95 (m, 3H), 6.76 (dt,  $J = 7.8, 1.7$  Hz, 1H), 6.49 (d,  $J = 3.3$  Hz, 1H), 6.44 (dd,  $J = 7.6, 4.9$  Hz, 1H), 5.93 (dd,  $J = 3.2, 1.9$  Hz, 1H), 1.10 (s, 9H);  $^{13}\text{C NMR}$  (100 MHz,  $\text{C}_6\text{D}_6$ )  $\delta$  176.6, 150.3, 149.9, 143.7, 142.9, 135.5, 127.5, 123.1, 110.8, 110.5, 86.1, 83.5, 59.2, 38.9, 27.0; **IR** (film)  $\nu_{\text{max}}$  2974, 1737, 1583, 1464, 1429, 1273, 1135, 1008, 919, 779, 741  $\text{cm}^{-1}$ ; **MS** ( $\text{EI}^+$ ):  $m/z$  283 ( $\text{M}^+$ ); **HRMS** ( $\text{EI}^+$ ) calcd for  $[\text{C}_{17}\text{H}_{17}\text{NO}_3]^+$ :  $m/z$  283.1208, found 283.1205.

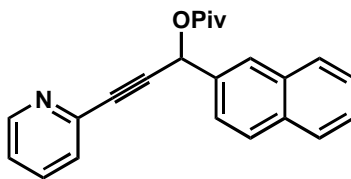

**1-(Naphthalen-3-yl)-3-(pyridine-2-yl)prop-2-ynyl pivalate (Table 2, entry 7):** Yellow oil, 68% yield;  $R_f$  (3:1 hexanes/EtOAc) 0.27;  $^1\text{H NMR}$  (400 MHz,  $\text{C}_6\text{D}_6$ )  $\delta$  8.34 (dd,  $J = 4.8, 0.8$  Hz, 1H), 8.00 (d,  $J = 0.5$  Hz, 1H), 7.72 (dd,  $J = 8.5, 1.7$  Hz, 1H), 7.58 (d,  $J = 8.6$  Hz, 1H), 7.53 (dd,  $J = 5.9, 3.3$  Hz, 2H), 7.21-7.17 (m, 2H), 7.09 (s, 1H), 7.04 (td,  $J = 7.8, 1.0, 1.0$  Hz, 1H), 6.75 (dt,  $J = 7.7, 1.8$  Hz, 1H), 6.43 (ddd,  $J = 7.6, 4.8, 1.2$  Hz, 1H), 1.13 (s, 9H);  $^{13}\text{C NMR}$  (125 MHz,  $\text{C}_6\text{D}_6$ )  $\delta$  176.6, 150.3, 143.2, 135.5, 135.0, 133.9, 133.6, 129.0, 128.7, 128.3, 127.6, 127.4, 126.7, 126.5, 125.4, 123.0, 87.3, 86.0, 66.3, 38.9, 27.0; **IR** (film)  $\nu_{\text{max}}$  2973, 1732, 1582, 1463, 1428, 1274, 1138  $\text{cm}^{-1}$ ; **MS** ( $\text{EI}^+$ ):  $m/z$  343 ( $\text{M}^+$ ); **HRMS** ( $\text{EI}^+$ ) calcd for  $[\text{C}_{23}\text{H}_{21}\text{NO}_2]^+$ :  $m/z$  343.1572, found 343.1577.

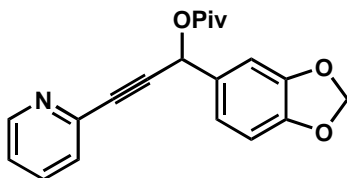

**1-(Benzo[d][1,3]dioxol-5-yl)-3-(pyridine-2-yl)prop-2-ynyl pivalate (Table 2, entry 8):** Yellow oil, 92% yield;  $R_f$  (3:1 hexanes/EtOAc) 0.23;  $^1\text{H NMR}$  (400 MHz,  $\text{C}_6\text{D}_6$ )  $\delta$  8.33 (d,  $J = 3.3$  Hz, 1H), 7.18 (d,  $J = 1.7$  Hz, 1H), 7.03-6.97 (m, 2H), 6.83 (s, 1H), 6.75 (dt,  $J = 7.7, 1.6$  Hz, 1H), 6.52 (d,  $J = 8.0$  Hz, 1H), 6.43 (dd,  $J = 7.4, 4.9$  Hz, 1H), 5.20 (d,  $J = 3.6$  Hz, 2H), 1.10 (s, 9H);  $^{13}\text{C NMR}$  (125 MHz,  $\text{C}_6\text{D}_6$ )  $\delta$  176.6, 150.3, 148.6, 148.4, 143.2, 135.5, 131.5, 127.3, 123.0, 122.1, 108.5, 108.4, 101.2, 86.9, 86.0, 65.9, 38.8, 27.0; **IR** (film)  $\nu_{\text{max}}$  2974, 1732, 1582, 1489, 1464, 1249, 1140, 1038, 936, 779  $\text{cm}^{-1}$ ; **MS** ( $\text{EI}^+$ ):  $m/z$  337 ( $\text{M}^+$ ); **HRMS** ( $\text{EI}^+$ ) calcd for  $[\text{C}_{20}\text{H}_{19}\text{NO}_4]^+$ :  $m/z$  337.1314, found 337.1311.

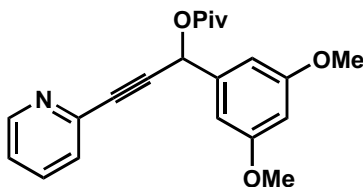

**1-(3,5-dimethoxyphenyl)-3-(pyridin-2-yl)prop-2-ynyl pivalate (Table 2, entry 9):** Yellow oil, 90% yield;  $R_f$  (3:1 hexanes/EtOAc) 0.15;  $^1\text{H NMR}$  (400 MHz,  $\text{C}_6\text{D}_6$ )  $\delta$  8.31 (d,  $J = 4.8$  Hz, 1H), 7.00 (d,  $J = 7.8$  Hz, 1H), 6.97-6.94 (m, 3H), 6.75 (dt,  $J = 7.7$ , 1.6 Hz, 1H), 6.49 (t,  $J = 2.2$  Hz, 1H), 6.43 (dd,  $J = 7.1$ , 5.3 Hz, 1H), 3.27 (s, 6H), 1.13 (s, 9H);  $^{13}\text{C NMR}$  (125 MHz,  $\text{C}_6\text{D}_6$ )  $\delta$  176.6, 161.7, 150.3, 143.2, 140.0, 135.5, 128.6, 127.4, 122.9, 105.8, 101.5, 86.0, 66.0, 54.9, 38.9, 27.1; **IR** (film)  $\nu_{\text{max}}$  2971, 1735, 1598, 1464, 1429, 1274, 1206, 1139, 1068, 779  $\text{cm}^{-1}$ ; **MS** ( $\text{EI}^+$ ):  $m/z$  353 ( $\text{M}^+$ ); **HRMS** ( $\text{EI}^+$ ) calcd for  $[\text{C}_{21}\text{H}_{23}\text{NO}_4]^+$ :  $m/z$  353, 1627, found 353.1628.

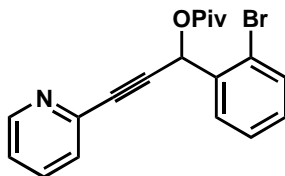

**1-(2-Bromophenyl)-3-(pyridin-2-yl)prop-2-ynyl pivalate (Table 2, entry 10):** Yellow oil, 83% yield;  $R_f$  (3:1 hexanes/EtOAc) 0.23;  $^1\text{H NMR}$  (400 MHz,  $\text{C}_6\text{D}_6$ )  $\delta$  8.32 (d,  $J = 4.1$  Hz, 1H), 7.95 (d,  $J = 7.7$  Hz, 1H), 7.29 (s, 1H), 7.24 (dd,  $J = 8.0$ , 1.1 Hz, 1H), 7.00 (d,  $J = 7.8$  Hz, 1H), 6.87 (dt,  $J = 7.7$ , 1.1 Hz, 1H), 6.74 (dt,  $J = 7.8$ , 1.6 Hz, 1H), 6.62 (dt,  $J = 7.9$ , 1.6 Hz, 1H), 6.46-6.40 (m, 1H), 1.14 (s, 9H);  $^{13}\text{C NMR}$  (100 MHz,  $\text{C}_6\text{D}_6$ )  $\delta$  176.2, 150.2, 136.6, 135.5, 133.3, 130.5, 130.2, 123.8, 123.0, 87.4, 85.0, 65.8, 60.0, 38.9, 27.1, 20.5, 14.2; **IR** (film)  $\nu_{\text{max}}$  2973, 1737, 1582, 1464, 1429, 1275, 1135, 1028, 779  $\text{cm}^{-1}$ ; **MS** ( $\text{EI}^+$ ):  $m/z$  371 ( $\text{M}^+$ ); **HRMS** ( $\text{EI}^+$ ) calcd for  $[\text{C}_{19}\text{H}_{18}\text{BrNO}_2]^+$ :  $m/z$  371.0520, found 371.0511.



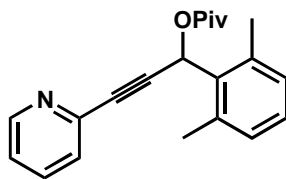

**1-(2,6-dimethylphenyl)-3-(pyridin-2-yl)prop-2-ynyl pivalate (Table 2, entry 11):** Yellow oil, 80% yield;  $R_f$  (3:1 hexanes/EtOAc) 0.23;  $^1\text{H NMR}$  (400 MHz,  $\text{C}_6\text{D}_6$ )  $\delta$  8.30 (d,  $J = 4.8$  Hz, 1H), 7.44 (s, 1H), 6.99-6.91 (m, 2H), 6.89-6.84 (m, 2H), 6.74 (dt,  $J = 7.7$ , 1.8 Hz, 1H), 6.42 (ddd,  $J = 7.6$ , 4.8, 1.1 Hz, 1H), 2.65 (s, 6H), 1.07 (s, 9H);  $^{13}\text{C NMR}$  (100 MHz,  $\text{C}_6\text{D}_6$ )  $\delta$  176.6, 150.3, 143.3, 137.8, 135.5, 134.1, 129.5, 129.0, 127.2, 122.8, 86.4, 85.7, 62.4, 38.9, 27.1, 20.5; **IR** (film)  $\nu_{\text{max}}$  2974, 1732, 1582, 1463, 1428, 1275, 1141, 1032, 938, 777  $\text{cm}^{-1}$ ; **MS** ( $\text{EI}^+$ ):  $m/z$  321 ( $\text{M}^+$ ); **HRMS** ( $\text{EI}^+$ ) calcd for  $[\text{C}_{21}\text{H}_{23}\text{NO}_2]^+$ :  $m/z$  321.1729, found 321.1724.

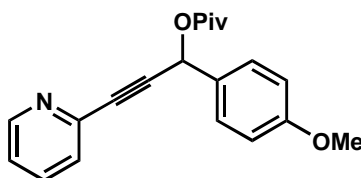

**1-(4-Methoxyphenyl)-3-(pyridine-2-yl)prop-2-ynyl pivalate (Table 2, entry 12b):** Yellow oil, 81% yield;  $R_f$  (3:1 hexanes/EtOAc) 0.33;  $^1\text{H NMR}$  (400 MHz,  $\text{C}_6\text{D}_6$ )  $\delta$  8.33 (d,  $J = 4.3$  Hz, 1H), 7.54 (d,  $J = 8.7$  Hz, 2H), 7.04 (d,  $J = 7.8$  Hz, 1H), 6.94 (s, 1H), 6.78 (dt,  $J = 7.7$ , 1.8 Hz, 1H), 6.68 (d,  $J = 8.7$  Hz, 2H), 6.45 (ddd,  $J = 7.6$ , 4.8, 1.1 Hz, 1H), 3.21 (s, 3H), 1.12 (s, 9H);  $^{13}\text{C NMR}$  (125 MHz,  $\text{C}_6\text{D}_6$ )  $\delta$  176.7, 160.5, 150.3, 143.3, 135.5, 129.8, 129.6, 127.3, 122.9, 114.3, 86.9, 86.3, 65.8, 54.7, 38.8, 27.0; **IR** (film)  $\nu_{\text{max}}$  2972, 1732, 1582, 1464, 1251, 1140, 1032, 833, 779  $\text{cm}^{-1}$ ; **MS** ( $\text{EI}^+$ ):  $m/z$  323 ( $\text{M}^+$ ); **HRMS** ( $\text{EI}^+$ ) calcd for  $[\text{C}_{20}\text{H}_{21}\text{NO}_3]^+$ :  $m/z$  323.1521, found 323.1517.

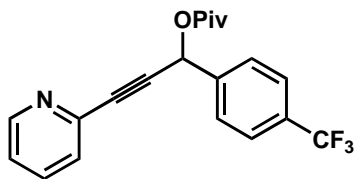

**1-(4-(trifluoromethyl)phenyl)-3-(pyridine-2-yl)prop-2-ynyl pivalate (Table 2, entry 12c):** Yellow oil, 78% yield;  $R_f$  (3:1 hexanes:EtOAc) 0.27; **mp** 109-111 °C;  $^1\text{H NMR}$  (400 MHz,  $\text{C}_6\text{D}_6$ )  $\delta$  8.33 (d,  $J = 4.6$  Hz, 1H), 7.36 (d,  $J = 8.2$  Hz, 2H), 7.24 (d,  $J = 8.2$  Hz, 2H), 7.02 (d,  $J = 7.8$  Hz, 1H), 6.80-6.73 (m, 2H), 6.50-6.38 (m, 1H), 1.10 (s, 9H);  $^{13}\text{C NMR}$  (100 MHz,  $\text{C}_6\text{D}_6$ )  $\delta$  176.3, 150.3, 142.7, 141.1, 135.5, 128.0, 127.8, 127.2, 125.7, 125.7, 123.1, 87.3, 84.9, 65.0, 38.7, 26.8; **IR** (film)  $\nu_{\text{max}}$  2976, 1737, 1583, 1464, 1429, 1326, 1132, 1068, 1019, 779  $\text{cm}^{-1}$ ; **MS** ( $\text{EI}^+$ ):  $m/z$  361 ( $\text{M}^+$ ); **HRMS** ( $\text{EI}^+$ ) calcd for  $[\text{C}_{20}\text{H}_{18}\text{F}_3\text{NO}_2]^+$ :  $m/z$  361.1299, found 361.1302.

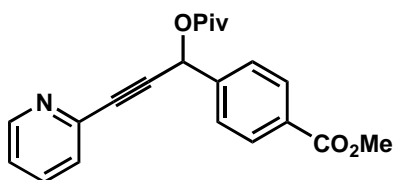

**Methyl 4-(1-(pivaloyloxy)-3-(pyridin-2-yl)prop-2-ynyl)benzoate (Table 2, entry 12d):** White solid, 73% yield;  $R_f$  (3:1 hexanes/EtOAc) 0.17; **mp** 97-100 °C;  $^1\text{H NMR}$  (500 MHz,  $\text{C}_6\text{D}_6$ )  $\delta$  8.31 (d,  $J = 4.1$  Hz, 1H), 8.03 (d,  $J = 8.4$  Hz, 2H), 7.49 (d,  $J = 8.2$  Hz, 2H), 7.00 (d,  $J = 7.8$  Hz, 1H), 6.82 (s, 1H), 6.76 (dt,  $J = 7.7, 1.8$  Hz, 1H), 6.44 (ddd,  $J = 7.6, 4.8, 1.1$  Hz, 1H), 3.44 (s, 3H), 1.09 (s, 9H);  $^{13}\text{C NMR}$  (125 MHz,  $\text{C}_6\text{D}_6$ )  $\delta$  176.4, 166.1, 150.4, 143.0, 142.1, 135.5, 131.1, 130.3, 127.3, 123.1, 87.4, 85.2, 65.4, 51.6, 38.8, 27.0; **IR** (film)  $\nu_{\text{max}}$  2974, 1727, 1582, 1464, 1429, 1278, 1137, 1021, 779, 704  $\text{cm}^{-1}$ ; **MS** ( $\text{EI}^+$ ):  $m/z$  351 ( $\text{M}^+$ ); **HRMS** ( $\text{EI}^+$ ) calcd for  $[\text{C}_{21}\text{H}_{21}\text{NO}_4]^+$ :  $m/z$  351.1471, found 351.1470.

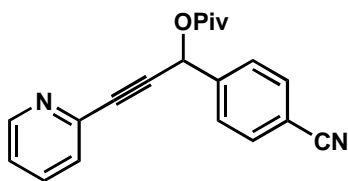

**1-(4-Cyanophenyl)-3-(pyridin-2-yl)prop-2-ynyl pivalate (Table 2, entry 12e):** Yellow solid, 77% yield;  $R_f$  (3:1 hexanes/EtOAc) 0.20;  $^1\text{H NMR}$  (500 MHz,  $\text{C}_6\text{D}_6$ )  $\delta$  8.30 (d,  $J = 4.8$  Hz, 1H), 7.16 (d,  $J = 8.3$  Hz, 2H), 7.01 (d,  $J = 7.8$  Hz, 1H), 6.92 (d,  $J = 8.3$  Hz, 2H), 6.78 (dt,  $J = 7.7, 1.7$  Hz, 1H), 6.63 (s, 1H), 6.45 (ddd,  $J = 7.6, 4.8, 0.8$  Hz, 1H), 1.08 (s, 9H);  $^{13}\text{C NMR}$  (125 MHz,  $\text{C}_6\text{D}_6$ )  $\delta$  176.3, 150.5, 142.7, 141.7, 135.6, 132.4, 128.3, 127.3, 123.3, 118.3, 113.2, 87.6, 84.5, 65.1, 38.8, 26.9; **IR** (film)  $\nu_{\text{max}}$  2974, 2230, 1737, 1582, 1464, 1429, 1276, 1135, 1032, 780  $\text{cm}^{-1}$ ; **MS** ( $\text{EI}^+$ ):  $m/z$  318 ( $\text{M}^+$ ); **HRMS** ( $\text{EI}^+$ ) calcd for  $[\text{C}_{20}\text{H}_{18}\text{N}_2\text{O}_2]^+$ :  $m/z$  318.1368, found 318.1368.

### Scheme S2

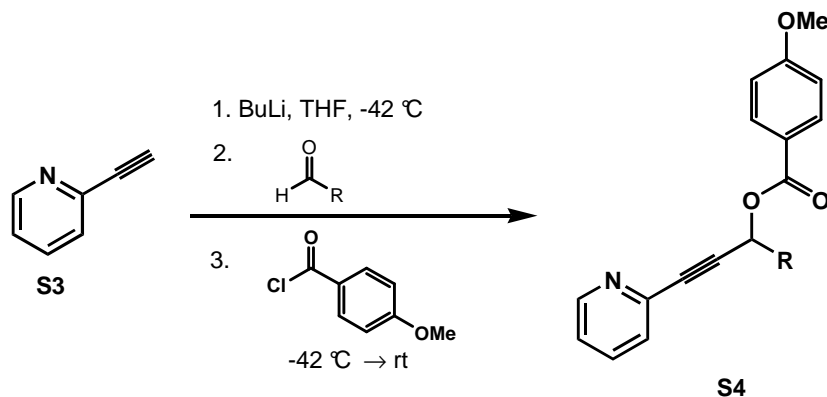

### Representative Procedure for 4-Methoxybenzoate Substrates

A flame-dried, round-bottom flask was charged with anhydrous THF (27 mL) and 2-ethynylpyridine (280  $\mu\text{L}$ , 2.75 mmol). The solution was cooled to  $-42$   $^\circ\text{C}$  and BuLi (1.21 mL, 3.03 mmol, 2.5 M in hexanes) was added dropwise. The solution was allowed to stir at this temperature for 90 min, and then benzaldehyde (335  $\mu\text{L}$ , 3.30 mmol) was added dropwise to the reaction mixture. The mixture was stirred at  $-42$   $^\circ\text{C}$  for 2 h, then 4-methoxybenzoyl chloride (521  $\mu\text{L}$ , 3.85 mmol) was added dropwise. The mixture was stirred for an additional 90 min, then allowed to warm to rt. After 3 h, saturated aqueous

NH<sub>4</sub>Cl solution (25 mL) was added slowly and stirring continued for 10 min. The mixture was diluted with EtOAc (20 mL), and the aqueous layer was extracted with EtOAc (3 x 20 mL). The combined organic phase was washed with brine (30 mL) and dried over MgSO<sub>4</sub>. The solvent was removed under reduced pressure and the crude mixture was purified via flash chromatography (4:1 hexanes/EtOAc) to obtain a yellow oil (724.6 mg, 77% yield).

### Spectral Data for 4-Methoxybenzoate Substrates

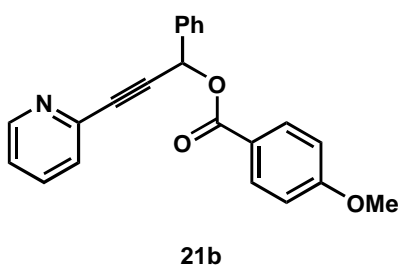

**1-Phenyl-3-(pyridin-2-yl)prop-2-ynyl 4-methoxybenzoate (21b):** Yellow oil, 77% yield; **R<sub>f</sub>** (3:1 hexanes/EtOAc) 0.10; **<sup>1</sup>H NMR** (400 MHz, C<sub>6</sub>D<sub>6</sub>) δ 8.34 (d, *J* = 4.1 Hz, 1H), 8.10 (d, *J* = 9.0 Hz, 2H), 7.69 (d, *J* = 7.1 Hz, 2H), 7.20 (s, 1H), 7.12-7.01 (m, 3H), 6.98 (td, *J* = 7.8, 1.0 Hz, 1H), 6.75 (dt, *J* = 7.8, 1.8 Hz, 1H), 6.56-6.51 (m, 2H), 6.43 (ddd, *J* = 7.6, 4.9, 1.1 Hz, 1H), 3.08 (s, 3H); **<sup>13</sup>C NMR** (100 MHz, C<sub>6</sub>D<sub>6</sub>) δ 165.1, 163.9, 150.2, 143.2, 137.6, 135.5, 132.4, 129.0, 128.9, 127.9, 127.4, 123.0, 122.6, 113.9, 87.3, 86.1, 66.5, 54.8; **IR** (film)  $\nu_{\max}$  2974, 1716, 1606, 1582, 1511, 1463, 1253, 1167, 1091, 768 cm<sup>-1</sup>; **MS** (EI<sup>+</sup>): *m/z* 343 (M<sup>+</sup>); **HRMS** (EI<sup>+</sup>) calcd for [C<sub>22</sub>H<sub>17</sub>NO<sub>3</sub>]<sup>+</sup>: *m/z* 343.1208, found 343.1205.

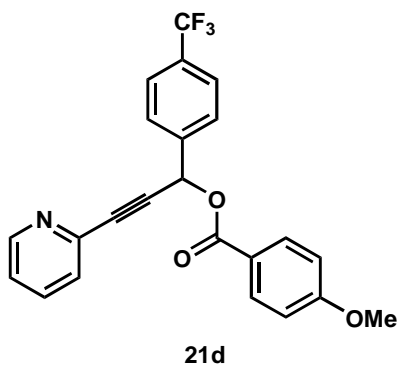

**1-(4-(trifluoromethyl)phenyl)-3-(pyridin-2-yl)prop-2-ynyl 4-methoxybenzoate (21d):**

Yellow oil, 91% yield;  $R_f$  (3:1 hexanes/EtOAc) 0.15;  $^1\text{H NMR}$  (500 MHz,  $\text{C}_6\text{D}_6$ )  $\delta$  8.33 (d,  $J = 4.7$  Hz, 1H), 8.11 (d,  $J = 8.5$  Hz, 2H), 7.46 (d,  $J = 8.0$  Hz, 2H), 7.24 (d,  $J = 8.1$  Hz, 2H), 7.05-7.00 (m, 2H), 6.77 (t,  $J = 7.7$  Hz, 1H), 6.58 (d,  $J = 8.5$  Hz, 2H), 6.45 (dd,  $J = 7.5, 4.9$  Hz, 1H), 3.09 (s, 3H);  $^{13}\text{C NMR}$  (125 MHz,  $\text{C}_6\text{D}_6$ )  $\delta$  164.9, 164.1, 150.4, 142.9, 141.2, 135.6, 132.380, 128.4, 128.3, 127.9, 127.4, 125.9, 123.2, 122.2, 114.1, 87.7, 85.1, 65.6, 54.8; **IR** (film)  $\nu_{\text{max}}$  2937, 2841, 1719, 1606, 1511, 1464, 1326, 1254, 1168, 1091, 1020, 846, 771  $\text{cm}^{-1}$ ; **MS** ( $\text{EI}^+$ ):  $m/z$  411 ( $\text{M}^+$ ); **HRMS** ( $\text{EI}^+$ ) calcd for  $[\text{C}_{23}\text{H}_{16}\text{F}_3\text{NO}_3]^+$ :  $m/z$  411.1082, found 411.1079.

**Scheme S3**

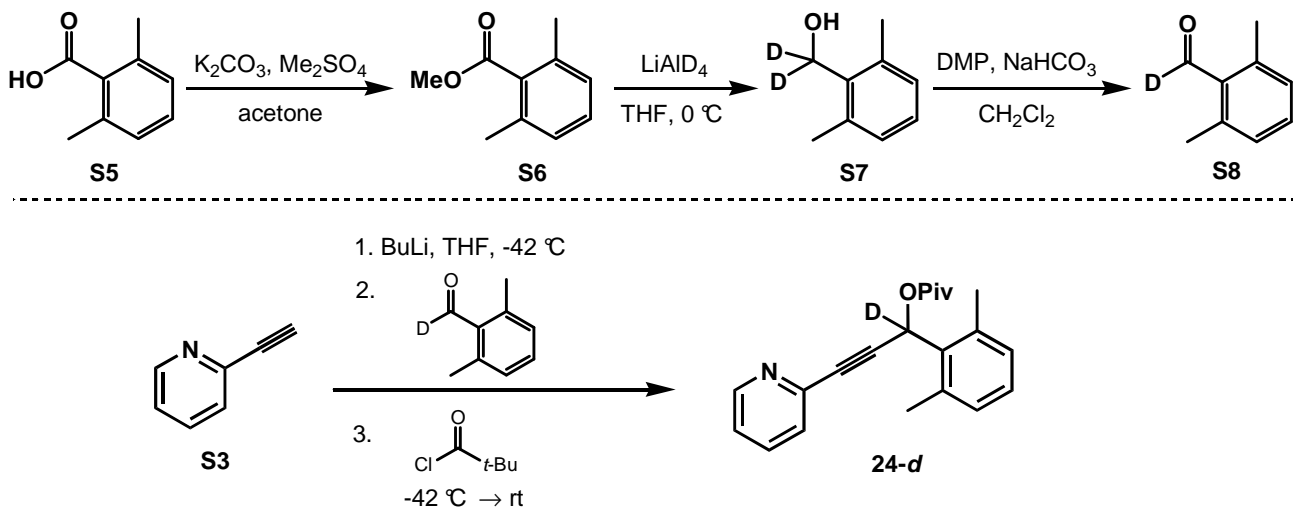

### Synthesis of the Deuterated Substrate (**24-d**)

2,6-dimethylbenzoic acid (**S5**) (1.00 g, 6.7 mmol), potassium carbonate (1.40 g, 10.1 mmol), dimethyl sulfate (700  $\mu$ L, 7.4 mmol) and acetone (33 mL) were combined in a round-bottom flask and stirred under a nitrogen atmosphere at rt for 4 h. The solvent was removed under reduced pressure and the resulting residue was taken up in ethyl acetate (20 mL). The solution was diluted with water (20 mL), and the aqueous layer was extracted with ethyl acetate (3 x 15 mL). The organic layers were combined, washed with brine (30 mL), and dried over  $\text{MgSO}_4$ . The solvent was removed under reduced pressure to yield a peach oil, which was purified via flash chromatography (9:1 hexanes/EtOAc) to give a light peach oil (1.02 g, 93% yield).

Lithium aluminum deuteride (51.2 mg, 1.22 mmol) was added in three portions to a round-bottom flask containing methyl ester **S6** (200 mg, 1.22 mmol) in THF (6 mL) at 0 °C. The mixture was stirred at 0 °C for 2 h under a nitrogen atmosphere. Water (51  $\mu$ L) was added dropwise over 1 min followed by 10% sodium hydroxide aqueous solution (51  $\mu$ L). Then, an additional 153  $\mu$ L of water was added dropwise. The salts were removed via vacuum filtration and the solvent was removed under reduced pressure to yield a white crystalline solid (144.9 mg, 86% yield).

The deuterated alcohol **S7** (441.9 mg, 3.2 mmol), sodium bicarbonate (806.5 mg, 9.6 mmol) and dichloromethane (16 mL) were combined in a flame-dried, round-bottom flask. Dess Martin periodinane (1.612 g, 3.8 mmol) was added to the mixture in five portions over 5 min. The mixture was stirred at rt under a nitrogen atmosphere for 1 h. Saturated aqueous sodium sulfite solution (20 mL) was then added, and the aqueous layer was extracted with dichloromethane (3 x 20 mL). The organic layers were combined and washed with saturated aqueous sodium bicarbonate solution (1 x 30 mL), brine (1 x 30 mL) and dried over  $\text{MgSO}_4$ . The solvent was removed under reduced pressure, and the resulting crude aldehyde was purified via flash chromatography (4:1 hexanes/EtOAc). The deuterated aldehyde **S8** was obtained as a colorless oil (315.3 mg, 73% yield).

2-ethynylpyridine was added into **S8** using the previously described protocol (Scheme S1) to give the deuterated substrate (**24-d**) as a colorless oil (306.2 mg, 63% yield).  $^1\text{H}$

**NMR** (500 MHz,  $C_6D_6$ )  $\delta$  8.32 (d,  $J = 4.8$  Hz, 1H), 6.97-6.92 (m, 2H), 6.87 (d,  $J = 7.5$  Hz, 2H), 6.74 (dt,  $J = 7.7, 1.4$  Hz, 1H), 6.45-6.41 (m, 1H), 2.65 (s, 6H), 1.07 (s, 9H);  **$^{13}C$  NMR** (125 MHz,  $C_6D_6$ )  $\delta$  176.6, 150.2, 143.2, 137.8, 135.5, 134.0, 129.8, 129.0, 128.3, 127.3, 122.9, 86.4, 85.7, 38.9, 27.1, 20.5; **IR** (film)  $\nu_{max}$  2973, 1732, 1582, 1463, 1276, 1149, 1084, 778  $cm^{-1}$ ; **MS** (EI<sup>+</sup>):  $m/z$  322 (M<sup>+</sup>); **HRMS** (EI<sup>+</sup>) calcd for  $[C_{21}H_{22}DNO_2]^+$ :  $m/z$  322.1792, found 322.1789.

#### Scheme S4

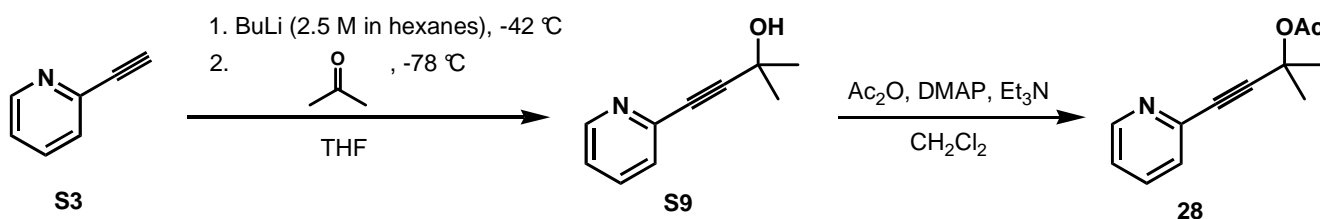

#### Synthesis of Tertiary Substrate (28)

**2-Methyl-4-(pyridin-2-yl)but-3-yn-2-yl acetate:** A flame-dried, round-bottom flask was charged with anhydrous THF (20 mL) and 2-ethynylpyridine (S3) (202  $\mu$ L, 2.0 mmol). The solution was cooled to  $-42$  °C and BuLi (880  $\mu$ L, 2.2 mmol, 2.5 M in hexanes) was added dropwise. The solution was allowed to stir at this temperature for 90 min, and then was further cooled to  $-78$  °C. Acetone (177  $\mu$ L, 2.4 mmol) was added dropwise at  $-78$  °C, and the mixture was stirred for 4 h and then allowed to warm to rt. After 3 h, saturated aqueous  $NH_4Cl$  solution (20 mL) was added slowly and stirring continued for 10 min. The mixture was diluted with EtOAc (15 mL) and the aqueous layer was extracted with EtOAc (3 x 15 mL). The organic layers were combined, washed with brine (30 mL) and dried over  $MgSO_4$ . Concentration under reduced pressure gave the crude product, which was purified via flash chromatography (1:1 hexanes/EtOAc) to obtain S9 as a yellow oil (258.8 mg, 80% yield).

The propargylic alcohol S9 (258 mg, 1.6 mmol), acetic anhydride (190  $\mu$ L, 2.0 mmol), DMAP (9.8 mg, 0.1 mmol), triethylamine (670  $\mu$ L, 3.0 mmol) and dichloromethane (16 mL) were combined in a flame-dried, round-bottom flask and stirred under an nitrogen atmosphere at rt for 4 d. Saturated aqueous ammonium chloride solution (15 mL) was

added, and the aqueous layer was extracted with dichloromethane (3 x 15 mL). The organic layers were combined, washed with brine (30 mL) and dried over MgSO<sub>4</sub>. The solvent was removed under reduced pressure, and the crude oil was purified via flash chromatography (2:1 hexanes/EtOAc) to give **28** as a light yellow oil (212.9 mg, 66% yield). <sup>1</sup>H NMR (400 MHz, C<sub>6</sub>D<sub>6</sub>) δ 8.33 (d, *J* = 4.8 Hz, 1H), 7.17 (d, *J* = 8.2 Hz, 1H), 6.81-6.74 (m, 1H), 6.45-6.41 (m, 1H), 1.63-1.62 (m, 9H); <sup>13</sup>C NMR (125 MHz, C<sub>6</sub>D<sub>6</sub>) δ 168.6, 150.2, 143.8, 135.4, 127.3, 122.6, 90.3, 84.6, 72.0, 28.8, 21.4; IR (film) ν<sub>max</sub> 2989, 1739, 1582, 1464, 1428, 1281, 1245, 1135, 1016, 781 cm<sup>-1</sup>; MS (EI<sup>+</sup>): *m/z* 203 (M<sup>+</sup>); HRMS (EI<sup>+</sup>) calcd for [C<sub>12</sub>H<sub>13</sub>NO<sub>2</sub>]<sup>+</sup>: *m/z* 203.0946, found 203.0952.

### Scheme S5

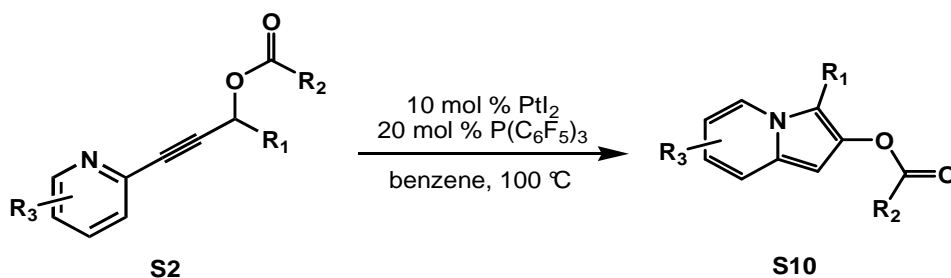

### Representative Procedure for the Formation of 2,3-Disubstituted Indolizines

1-Phenyl-3-(pyridin-2-yl)prop-2-ynyl pivalate (**S2**) (80 mg, 0.272 mmol), platinum(II) iodide (12 mg, 0.027 mmol) and tris(pentafluoro)phenyl phosphine (28 mg, 0.054 mmol) were combined in an oven-dried 4 mL vial equipped with a stir bar. The vial was evacuated and backfilled with nitrogen (3x). Benzene (2 mL) was added via syringe, and the vial was capped with a Teflon® cap and heated at 100 °C for 24 h. The vial was removed from the oil bath and allowed to cool to rt. Concentration under reduced pressure gave the crude product, which was purified using flash chromatography (9:1 hexanes/EtOAc) to yield **S10**.



## Spectral Data for Indolizine Products

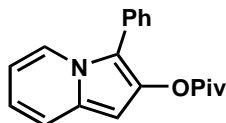

**3-Phenylindolizin-2-yl pivalate (19b):** Yellow oil, 75% yield;  $R_f$  (3:1 hexanes/EtOAc) 0.61;  $^1\text{H NMR}$  (500 MHz,  $\text{C}_6\text{D}_6$ )  $\delta$  7.72 (d,  $J = 7.1$  Hz, 1H), 7.32 (dd,  $J = 8.0, 1.0$  Hz, 2H), 7.16-7.11 (m, 2H), 7.06-6.99 (m, 2H), 6.68 (s, 1H), 6.35 (ddd,  $J = 8.9, 6.6, 0.9$  Hz, 1H), 5.98 (dt,  $J = 7.1, 1.3$  Hz, 1H), 1.13 (s, 9H);  $^{13}\text{C NMR}$  (100 MHz,  $\text{C}_6\text{D}_6$ )  $\delta$  175.9, 140.0, 130.7, 129.9, 129.6, 129.0, 127.6, 122.2, 119.4, 117.7, 114.9, 110.7, 93.5, 39.1, 27.2; **IR** (film)  $\nu_{\text{max}}$  2974, 1751, 1479, 1432, 1351, 1312, 1275, 1110, 759, 700  $\text{cm}^{-1}$ ; **MS** ( $\text{EI}^+$ ):  $m/z$  293 ( $\text{M}^+$ ); **HRMS** ( $\text{EI}^+$ ) calcd for  $[\text{C}_{19}\text{H}_{19}\text{NO}_2]^+$ :  $m/z$  293.1416, found 293.1411.

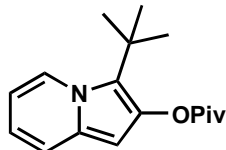

**3-tert-butylindolizin-2-yl pivalate (Table 2, entry 1):** Yellow oil, 11% yield;  $R_f$  (3:1 hexanes/EtOAc) 0.50;  $^1\text{H NMR}$  (500 MHz,  $\text{C}_6\text{D}_6$ )  $\delta$  7.61 (d,  $J = 7.4$  Hz, 1H), 7.34 (d,  $J = 9.0$  Hz, 1H), 6.85 (s, 1H), 6.38-6.30 (m, 1H), 6.10-6.06 (m, 1H), 1.29 (s, 9H), 1.15 (s, 9H);  $^{13}\text{C NMR}$  (125 MHz,  $\text{C}_6\text{D}_6$ )  $\delta$  176.1, 128.3, 123.9, 123.1, 116.9, 114.1, 109.7, 104.6, 39.2, 31.8, 28.6, 28.2, 27.4; **IR** (film)  $\nu_{\text{max}}$  2969, 1750, 1479, 1417, 1366, 1343, 1278, 1120  $\text{cm}^{-1}$ ; **MS** ( $\text{EI}^+$ ):  $m/z$  273 ( $\text{M}^+$ ); **HRMS** ( $\text{EI}^+$ ) calcd for  $[\text{C}_{17}\text{H}_{23}\text{NO}_2]^+$ :  $m/z$  273.1729, found 273.1727.

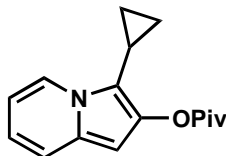

**3-Cyclopropylindolizin-2-yl pivalate (Table 2, entry 2):** Yellow oil, 49% yield;  $R_f$  (3:1 hexanes/EtOAc) 0.57;  $^1\text{H NMR}$  (500 MHz,  $\text{C}_6\text{D}_6$ )  $\delta$  7.66 (dd,  $J = 7.0, 0.8$  Hz, 1H), 7.07 (d,  $J = 8.9$  Hz, 1H), 6.52 (s, 1H), 6.47-6.42 (m, 1H), 6.23 (dt,  $J = 6.9, 1.2$  Hz, 1H), 1.40-1.33 (m, 1H), 1.31 (s, 9H), 0.60-0.54 (m, 2H), 0.46-0.41 (m, 2H);  $^{13}\text{C NMR}$  (125 MHz,  $\text{C}_6\text{D}_6$ )  $\delta$  175.7, 140.5, 129.4, 122.6, 119.0, 116.7, 110.0, 92.0, 39.2, 27.4, 5.1, 3.8; **IR** (film)  $\nu_{\text{max}}$  2974, 1751, 1455, 1439, 1341, 1277, 1143, 1111  $\text{cm}^{-1}$ ; **MS** ( $\text{EI}^+$ ):  $m/z$  257 ( $\text{M}^+$ ); **HRMS** ( $\text{EI}^+$ ) calcd for  $[\text{C}_{16}\text{H}_{19}\text{NO}_2]^+$ :  $m/z$  257.1416, found 257.1412.

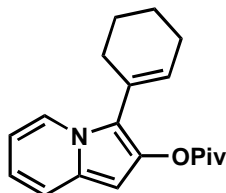

**3-Cyclohexenylindolizin-2-yl pivalate (Table 2, entry 3):** Yellow oil, 74% yield;  $R_f$  (3:1 hexanes/EtOAc) 0.66;  $^1\text{H NMR}$  (400 MHz,  $\text{C}_6\text{D}_6$ )  $\delta$  7.66 (dd,  $J = 7.1, 0.9$  Hz, 1H), 7.04 (dt,  $J = 9.0, 1.0$  Hz, 1H), 6.58 (s, 1H), 6.38 (ddd,  $J = 8.9, 6.5, 1.0$  Hz, 1H), 6.13 (td,  $J = 7.1, 1.3$  Hz, 1H), 5.84-5.80 (m, 1H), 2.25-2.19 (m, 2H), 2.01-1.94 (m, 2H), 1.61-1.46 (m, 4H), 1.28 (s, 9H);  $^{13}\text{C NMR}$  (100 MHz,  $\text{C}_6\text{D}_6$ )  $\delta$  175.9, 139.2, 131.0, 129.9, 127.5, 123.1, 119.3, 117.0, 116.7, 110.2, 92.9, 39.2, 27.7, 27.4, 25.8, 23.2, 22.5; **IR** (film)  $\nu_{\text{max}}$  2932, 1752, 1480, 1437, 1276, 1137, 1110  $\text{cm}^{-1}$ ; **MS** ( $\text{EI}^+$ ):  $m/z$  297 ( $\text{M}^+$ ); **HRMS** ( $\text{EI}^+$ ) calcd for  $[\text{C}_{19}\text{H}_{23}\text{NO}_2]^+$ :  $m/z$  297.1729, found 297.1730.

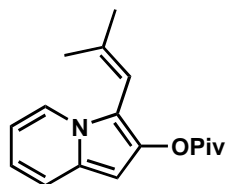

**3-(2-Methylprop-1-enyl)indolizin-2-yl pivalate (Table 2, entry 4):** Yellow oil, 54% yield;  $R_f$  (3:1 hexanes/EtOAc) 0.64;  $^1\text{H NMR}$  (500 MHz,  $C_6D_6$ )  $\delta$  7.31 (d,  $J = 7.0$  Hz, 1H), 7.06 (d,  $J = 8.9$  Hz, 1H), 6.67 (s, 1H), 6.43-6.38 (m, 1H), 6.13 (dt,  $J = 7.0, 6.9, 1.2$  Hz, 1H), 5.86 (s, 1H), 1.73 (s, 3H), 1.62 (s, 3H), 1.26 (s, 9H);  $^{13}\text{C NMR}$  (125 MHz,  $C_6D_6$ )  $\delta$  175.7, 141.0, 139.8, 130.1, 122.7, 119.0, 117.0, 112.3, 112.1, 110.2, 92.8, 39.2, 27.4, 25.4, 20.7; **IR** (film)  $\nu_{\text{max}}$  2973, 1752, 1480, 1455, 1351, 1275, 1143, 1109, 755  $\text{cm}^{-1}$ ; **MS** ( $\text{EI}^+$ ):  $m/z$  271 ( $\text{M}^+$ ); **HRMS** ( $\text{EI}^+$ ) calcd for  $[C_{17}H_{21}NO_2]$ :  $m/z$  271.1572, found 271.1567.

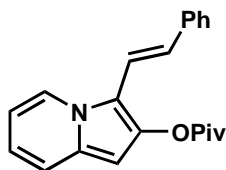

**3-Styrylindolizin-2-yl pivalate (Table 2, entry 5):** Yellow oil, 56% yield;  $R_f$  (3:1 hexanes/EtOAc) 0.55;  $^1\text{H NMR}$  (500 MHz,  $C_6D_6$ )  $\delta$  7.45-7.38 (m, 3H), 7.25-7.19 (m, 3H), 7.09 (t,  $J = 7.3$  Hz, 1H), 6.99-6.95 (m, 2H), 6.81 (s, 1H), 6.37 (td,  $J = 11.8, 5.9$  Hz, 1H), 6.12-6.07 (m, 1H), 1.27 (s, 9H);  $^{13}\text{C NMR}$  (125 MHz,  $C_6D_6$ )  $\delta$  175.3, 141.5, 138.8, 131.2, 129.0, 127.3, 126.8, 126.2, 122.4, 119.2, 118.0, 114.2, 113.1, 111.1, 94.5, 39.4, 27.4; **IR** (film)  $\nu_{\text{max}}$  2973, 1752, 1455, 1437, 1269, 1141, 1105  $\text{cm}^{-1}$ ; **MS** ( $\text{EI}^+$ ):  $m/z$  319 ( $\text{M}^+$ ); **HRMS** ( $\text{EI}^+$ ) calcd for  $[C_{21}H_{21}NO_2]$ :  $m/z$  319.1572, found 319.1573.

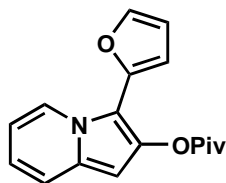

**3-(Furan-2-yl)indolizin-2-yl pivalate (Table 2, entry 6):** Brown oil, 34% yield;  $R_f$  (3:1 hexanes/EtOAc) 0.56;  $^1\text{H NMR}$  (500 MHz,  $C_6D_6$ )  $\delta$  8.24 (dd,  $J = 7.1, 0.7$  Hz, 1H), 7.11 (d,  $J = 1.2$  Hz, 1H), 6.97 (d,  $J = 8.9$  Hz, 1H), 6.74 (s, 1H), 6.51 (d,  $J = 3.3$  Hz, 1H), 6.36 (ddd,  $J = 8.8, 6.6, 0.8$  Hz, 1H), 6.23 (dd,  $J = 3.3, 1.9$  Hz, 1H), 6.10 (dt,  $J = 7.1, 1.3$  Hz,

1H), 1.24 (s, 9H);  $^{13}\text{C}$  NMR (125 MHz,  $\text{C}_6\text{D}_6$ )  $\delta$  175.4, 145.5, 141.2, 140.7, 131.3, 124.1, 119.1, 118.3, 111.4, 111.2, 107.7, 93.8, 39.3, 27.3; **IR** (film)  $\nu_{\text{max}}$  2973, 1754, 1479, 1431, 1311, 1275, 1139, 1108  $\text{cm}^{-1}$ ; **MS** ( $\text{EI}^+$ ):  $m/z$  283 ( $\text{M}^+$ ); **HRMS** ( $\text{EI}^+$ ) calcd for  $[\text{C}_{17}\text{H}_{17}\text{NO}_3]$ :  $m/z$  283.1208, found 283.1208.

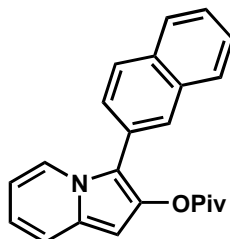

**3-(Naphthalen-2-yl)indolizin-2-yl pivalate** (Table 2, entry 7): Yellow oil; 73% yield;  $R_f$  (3:1 hexanes/EtOAc) 0.55;  $^1\text{H}$  NMR (500 MHz,  $\text{C}_6\text{D}_6$ )  $\delta$  7.85 (d,  $J = 7.1$  Hz, 1H), 7.77 (s, 1H), 7.64-7.54 (m, 3H), 7.47 (dd,  $J = 8.5, 1.5$  Hz, 1H), 7.28-7.21 (m, 2H), 7.09 (d,  $J = 9.0$  Hz, 1H), 6.78 (s, 1H), 6.41 (dd,  $J = 8.5, 6.8$  Hz, 1H), 6.06-6.01 (m, 1H), 1.15 (s, 9H);  $^{13}\text{C}$  NMR (125 MHz,  $\text{C}_6\text{D}_6$ )  $\delta$  175.9, 140.3, 134.1, 133.0, 130.9, 128.7, 128.5, 128.3, 127.3, 127.2, 126.6, 126.4, 122.2, 119.4, 117.9, 114.9, 110.8, 93.7, 39.2, 27.2; **IR** (film)  $\nu_{\text{max}}$  2973, 1754, 1466, 1310, 1110, 751  $\text{cm}^{-1}$ ; **MS** ( $\text{EI}^+$ ):  $m/z$  343 ( $\text{M}^+$ ); **HRMS** ( $\text{EI}^+$ ) calcd for  $[\text{C}_{23}\text{H}_{21}\text{NO}_2]$ :  $m/z$  343.1572, found 343.1572.

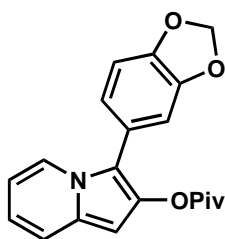

**3-(Benzo[d][1,3]dioxol-6-yl)indolizin-2-yl pivalate** (Table 2, entry 8): Yellow oil, 67% yield;  $R_f$  (3:1 hexanes/EtOAc) 0.50;  $^1\text{H}$  NMR (500 MHz,  $\text{C}_6\text{D}_6$ )  $\delta$  7.72 (d,  $J = 7.1$  Hz, 1H), 7.05 (d,  $J = 8.9$  Hz, 1H), 6.86 (d,  $J = 1.3$  Hz, 1H), 6.78 (dd,  $J = 8.0, 1.5$  Hz, 1H), 6.70-6.63 (m, 2H), 6.38 (dd,  $J = 8.2, 7.2$  Hz, 1H), 6.05-6.01 (m, 1H), 5.32-5.28 (m, 2H), 1.19 (s, 9H);  $^{13}\text{C}$  NMR (125 MHz,  $\text{C}_6\text{D}_6$ )  $\delta$  176.0, 148.5, 147.5, 139.8, 130.4, 123.6, 123.4, 122.2, 119.3, 117.5, 114.6, 110.6, 110.0, 108.9, 101.2, 93.3, 39.2, 27.3; **IR** (film)

$\nu_{\max}$  2974, 1751, 1481, 1237, 1142, 1110, 1038  $\text{cm}^{-1}$ ; **MS** ( $\text{EI}^+$ ):  $m/z$  337 ( $\text{M}^+$ ); **HRMS** ( $\text{EI}^+$ ) calcd for  $[\text{C}_{20}\text{H}_{19}\text{NO}_4]$ :  $m/z$  337.1314, found 337.1310.

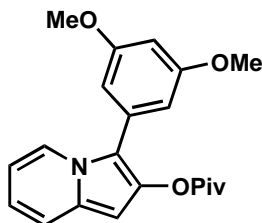

**3-(3,5-Dimethoxyphenyl)indolizin-2-yl pivalate** (Table 2, entry 9): Yellow oil, 76% yield;  $R_f$  (3:1 hexanes/EtOAc) 0.62; ;  $^1\text{H NMR}$  (500 MHz,  $\text{C}_6\text{D}_6$ )  $\delta$  7.91 (d,  $J = 7.1$  Hz, 1H), 7.06 (d,  $J = 8.9$  Hz, 1H), 6.72 (d,  $J = 2.2$  Hz, 2H), 6.70 (s, 1H), 6.56 (t,  $J = 2.1$  Hz, 1H), 6.38 (dd,  $J = 8.4, 7.1$  Hz, 1H), 6.04 (t,  $J = 6.8$  Hz, 1H), 3.32 (s, 6H), 1.21 (s, 9H);  $^{13}\text{C NMR}$  (125 MHz,  $\text{C}_6\text{D}_6$ )  $\delta$  176.0, 161.8, 140.0, 131.7, 130.7, 122.6, 119.3, 117.7, 110.7, 107.5, 100.7, 93.5, 54.9, 39.2, 27.3; **IR** (film)  $\nu_{\max}$  2971, 1751, 1593, 1455, 1419, 1282, 1205, 1156, 1111  $\text{cm}^{-1}$ ; **MS** ( $\text{EI}^+$ ):  $m/z$  353 ( $\text{M}^+$ ); **HRMS** ( $\text{EI}^+$ ) calcd for  $[\text{C}_{21}\text{H}_{23}\text{NO}_4]$ :  $m/z$  353.1627, found 353.1620.

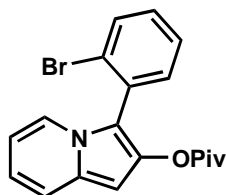

**3-(2-Bromophenyl)indolizin-2-yl pivalate** (Table 2, entry 10): Yellow oil, 72% yield;  $R_f$  (3:1 hexanes/EtOAc) 0.50;  $^1\text{H NMR}$  (500 MHz,  $\text{C}_6\text{D}_6$ )  $\delta$  7.44 (d,  $J = 8.8$  Hz, 1H), 7.23 (d,  $J = 7.0$  Hz, 1H), 7.18 (dd,  $J = 7.6, 1.5$  Hz, 1H), 7.08 (d,  $J = 9.0$  Hz, 1H), 6.91 (dt,  $J = 7.6, 1.1$  Hz, 1H), 6.78-6.73 (m, 2H), 6.44-6.39 (m, 1H), 6.11-6.06 (m, 1H), 1.12 (s, 9H);  $^{13}\text{C NMR}$  (125 MHz,  $\text{C}_6\text{D}_6$ )  $\delta$  175.8, 140.3, 134.1, 133.4, 131.1, 130.8, 130.2, 127.5, 126.5, 123.0, 119.2, 117.9, 113.8, 110.565, 93.0, 39.2, 27.2; **IR** (film)  $\nu_{\max}$  2973, 1752, 1463, 1431, 1313, 1111, 1028, 756  $\text{cm}^{-1}$ ; **MS** ( $\text{EI}^+$ ):  $m/z$  371 ( $\text{M}^+$ ); **HRMS** ( $\text{EI}^+$ ) calcd for  $[\text{C}_{19}\text{H}_{18}\text{BrNO}_2]$ :  $m/z$  371.0521, found 371.0522.

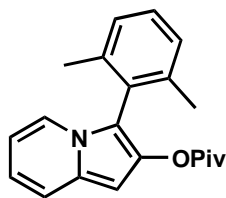

**3-(2,6-dimethylphenyl)indolizin-2-yl pivalate (Table 2, entry 11):** Yellow oil, 91% yield;  $R_f$  (3:1 hexanes/EtOAc) 0.63;  $^1\text{H NMR}$  (400 MHz,  $\text{C}_6\text{D}_6$ )  $\delta$  7.31-7.21 (m, 3H), 7.17-7.11 (m, 2H), 6.83 (s, 1H), 6.54 (ddd,  $J = 8.9, 6.6, 0.9$  Hz, 1H), 6.18 (dt,  $J = 6.8, 1.2$  Hz, 1H), 2.16 (s, 6H), 1.18 (s, 9H);  $^{13}\text{C NMR}$  (100 MHz,  $\text{C}_6\text{D}_6$ )  $\delta$  175.9, 140.5, 139.7, 130.4, 129.3, 128.4, 122.2, 119.3, 117.0, 113.724, 110.7, 92.8, 39.0, 27.0, 19.8; **IR** (film)  $\nu_{\text{max}}$  2973, 1754, 1461, 1347, 1276, 1138, 1110, 757  $\text{cm}^{-1}$ ; **MS** ( $\text{EI}^+$ ):  $m/z$  321 ( $\text{M}^+$ ); **HRMS** ( $\text{EI}^+$ ) calcd for  $[\text{C}_{21}\text{H}_{23}\text{NO}_2]$ :  $m/z$  321.1729, found 321.1729.

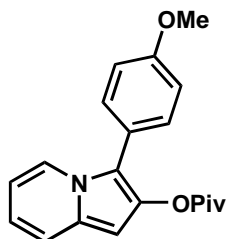

**3-(4-Methoxyphenyl)indolizin-2-yl pivalate (Table 2, entry 12b):** Yellow oil, 74% yield;  $R_f$  (3:1 hexanes: EtOAc) 0.59;  $^1\text{H NMR}$  (400 MHz,  $\text{C}_6\text{D}_6$ )  $\delta$  7.76 (d,  $J = 6.3$  Hz, 1H), 7.27 (d,  $J = 8.8$  Hz, 2H), 7.08 (d,  $J = 9.0$  Hz, 1H), 6.78 (d,  $J = 8.8$  Hz, 2H), 6.73 (s, 1H), 6.42-6.36 (m, 1H), 6.08-6.02 (m, 1H), 3.28 (s, 3H), 1.19 (s, 9H);  $^{13}\text{C NMR}$  (100 MHz,  $\text{C}_6\text{D}_6$ )  $\delta$  176.0, 159.6, 139.8, 131.2, 130.3, 122.2, 122.1, 119.4, 117.4, 114.9, 114.6, 110.5, 93.3, 54.8, 39.2, 27.3; **IR** (film)  $\nu_{\text{max}}$  2968, 1751, 1602, 1494, 1349, 1248, 1177, 1111, 1031  $\text{cm}^{-1}$ ; **MS** ( $\text{EI}^+$ ):  $m/z$  323 ( $\text{M}^+$ ); **HRMS** ( $\text{EI}^+$ ) calcd for  $[\text{C}_{20}\text{H}_{21}\text{NO}_3]$ :  $m/z$  323.1521, found 323.1520.

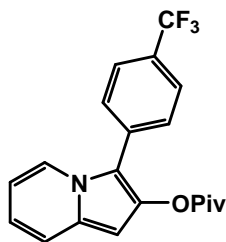

**3-(4-(Trifluoromethyl)phenyl)indolizin-2-yl pivalate (Table 2, entry 12c):** Yellow solid, 58% yield;  $R_f$  (3:1 hexanes/EtOAc) 0.61; mp 88-91 °C;  $^1\text{H NMR}$  (500 MHz,  $\text{C}_6\text{D}_6$ )  $\delta$  7.59 (d,  $J = 7.2$  Hz, 1H), 7.37 (d,  $J = 8.1$  Hz, 2H), 7.30 (d,  $J = 8.5$  Hz, 1H), 7.20 (d,  $J = 8.0$  Hz, 2H), 6.67 (s, 1H), 6.40 (ddd,  $J = 8.9, 6.6, 0.8$  Hz, 1H), 6.04 (dt,  $J = 7.1, 1.3$  Hz, 1H), 1.13 (s, 9H);  $^{13}\text{C NMR}$  (125 MHz,  $\text{C}_6\text{D}_6$ )  $\delta$  175.9, 175.7, 140.5, 133.5, 133.5, 131.4, 129.2, 128.3, 127.9, 126.0, 126.0, 125.9, 125.9, 124.4, 121.9, 121.5, 119.5, 118.5, 117.0, 116.7, 113.3, 111.4, 111.2, 108.1, 93.9, 39.3, 39.1, 27.4, 27.1; **IR** (film)  $\nu_{\text{max}}$  2976, 1753, 1480, 1325, 1111, 1068, 761  $\text{cm}^{-1}$ ; **MS** ( $\text{EI}^+$ ):  $m/z$  361 ( $\text{M}^+$ ); **HRMS** ( $\text{EI}^+$ ) calcd for  $[\text{C}_{20}\text{H}_{18}\text{F}_3\text{NO}_2]$ :  $m/z$  361.1290, found 361.1285.

(\*\*Note: this is a 2:1 mixture of 2,3- and 1,3-disubstituted indolizine)

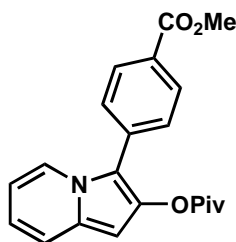

**Methyl 4-(2-pivaloyloxyindolizin-3-yl)benzoate (Table 2, entry 12d):** Green oil, 78% yield;  $R_f$  (3:1 hexanes/EtOAc) 0.44;  $^1\text{H NMR}$  (400 MHz,  $\text{C}_6\text{D}_6$ )  $\delta$  8.16 (d,  $J = 8.5$  Hz, 2H), 7.71 (dd,  $J = 7.1, 0.7$  Hz, 1H), 7.32 (d,  $J = 8.5$  Hz, 2H), 7.02 (d,  $J = 9.1$  Hz, 1H), 6.70 (s, 1H), 6.39 (ddd,  $J = 8.9, 6.7, 0.8$  Hz, 1H), 6.02 (dt,  $J = 7.1, 1.3$  Hz, 1H), 3.52 (s, 3H), 1.15 (s, 9H);  $^{13}\text{C NMR}$  (100 MHz,  $\text{C}_6\text{D}_6$ )  $\delta$  175.7, 166.4, 140.6, 134.4, 131.5, 130.3, 129.1, 128.6, 122.2, 119.4, 118.5, 113.8, 111.1, 94.0, 51.6, 39.2, 27.2; **IR** (film)  $\nu_{\text{max}}$  2974, 1753, 1721, 1607, 1438, 1276, 1140, 1108, 771  $\text{cm}^{-1}$ ; **MS** ( $\text{EI}^+$ ):  $m/z$  351 ( $\text{M}^+$ ); **HRMS** ( $\text{EI}^+$ ) calcd for  $[\text{C}_{21}\text{H}_{21}\text{NO}_4]$ :  $m/z$  351.1471, found 351.1466.

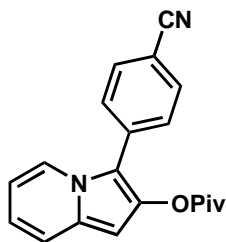

**3-(4-Cyanophenyl)indolizin-2-yl pivalate (Table 2, entry 12e):** Green oil, 31% yield;  $R_f$  (3:1 hexanes/EtOAc) 0.47;  $^1\text{H NMR}$  (500 MHz,  $\text{C}_6\text{D}_6$ )  $\delta$  7.52 (d,  $J = 7.2$  Hz, 1H), 7.04-6.96 (m, 4H), 6.78 (d,  $J = 8.5$  Hz, 1H), 6.64 (s, 1H), 6.38 (ddd,  $J = 8.9, 6.7, 0.8$  Hz, 1H), 6.01 (dt,  $J = 7.1, 1.2$  Hz, 1H), 1.13 (s, 9H);  $^{13}\text{C NMR}$  (125 MHz,  $\text{C}_6\text{D}_6$ )  $\delta$  175.5, 140.7, 133.8, 132.4, 131.7, 128.7, 128.3, 127.4, 121.9, 119.5, 118.9, 111.4, 110.8, 94.1, 39.1, 27.1; **IR** (film)  $\nu_{\text{max}}$  2975, 2225, 1752, 1605, 1511, 1479, 1439, 1314, 1275, 1139, 1109  $\text{cm}^{-1}$ ; **MS** ( $\text{EI}^+$ ):  $m/z$  318 ( $\text{M}^+$ ); **HRMS** ( $\text{EI}^+$ ) calcd for  $[\text{C}_{20}\text{H}_{18}\text{N}_2\text{O}_2]$ :  $m/z$  318.1368, found 318.1369.

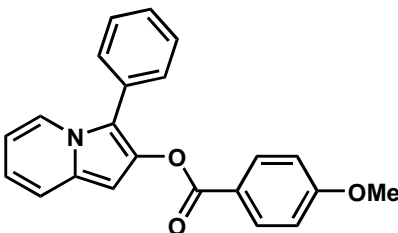

**3-Phenylindolizin-2-yl 4-methoxybenzoate (22b):** This indolizine was prepared according to the general procedure except the cycloimoserization was run for 2 d. Yellow oil, 67% yield;  $R_f$  (3:1 hexanes/EtOAc) 0.60;  $^1\text{H NMR}$  (500 MHz,  $\text{C}_6\text{D}_6$ )  $\delta$  8.17 (d,  $J = 8.7$  Hz, 2H), 7.82 (d,  $J = 7.1$  Hz, 1H), 7.45 (d,  $J = 7.6$  Hz, 2H), 7.17-7.12 (m, 2H), 7.09 (d,  $J = 8.9$  Hz, 1H), 7.03 (t,  $J = 7.5$  Hz, 1H), 6.93 (s, 1H), 6.55 (d,  $J = 8.7$  Hz, 2H), 6.40 (dd,  $J = 8.4, 7.0$  Hz, 1H), 6.04 (t,  $J = 6.8$  Hz, 1H), 3.10 (s, 3H);  $^{13}\text{C NMR}$  (125 MHz,  $\text{C}_6\text{D}_6$ )  $\delta$  164.4, 163.9, 140.0, 132.6, 130.8, 130.1, 129.4, 129.1, 127.6, 122.5, 122.2, 119.5, 117.8, 115.0, 114.1, 110.7, 93.9, 54.8; **IR** (film)  $\nu_{\text{max}}$  2360, 1732, 1606, 1510,



1254, 1167, 1070, 761  $\text{cm}^{-1}$ ; **MS** ( $\text{EI}^+$ ):  $m/z$  343 ( $\text{M}^+$ ); **HRMS** ( $\text{EI}^+$ ) calcd for  $[\text{C}_{22}\text{H}_{17}\text{NO}_3]$ :  $m/z$  343.1208, found 343.1206.

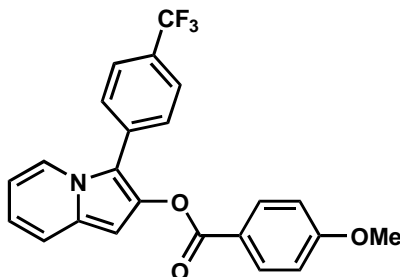

**3-(4-trifluoromethylphenyl)indolizin-2-yl 4-methoxybenzoate (22d)**: This indolizine was prepared according to the general procedure except the cycloimoserization was run for 2 d. Yellow oil, 56% yield; **R<sub>f</sub>** (3:1 hexanes/EtOAc) 0.55; **<sup>1</sup>H NMR** (400 MHz,  $\text{C}_6\text{D}_6$ )  $\delta$  8.15 (d,  $J = 8.7$  Hz, 2H), 7.64 (d,  $J = 7.1$  Hz, 1H), 7.31 (q,  $J = 8.6$  Hz, 4H), 7.05 (d,  $J = 9.6$  Hz, 1H), 6.87 (s, 1H), 6.57 (d,  $J = 8.8$  Hz, 2H), 6.42 (dd,  $J = 8.9, 6.6$  Hz, 1H), 6.06 (t,  $J = 6.9$  Hz, 1H), 3.10 (s, 3H); **<sup>13</sup>C NMR** (100 MHz,  $\text{C}_6\text{D}_6$ )  $\delta$  163.9, 163.9, 140.2, 133.4, 132.2, 131.2, 128.7, 128.4, 125.7, 125.701, 121.8, 121.7, 119.3, 118.2, 113.9, 113.1, 110.9, 94.0, 54.5; **IR** (film)  $\nu_{\text{max}}$  2360, 1734, 1607, 1511, 1325, 1252, 1167, 1122, 1068, 763  $\text{cm}^{-1}$ ; **MS** ( $\text{EI}^+$ ):  $m/z$  411 ( $\text{M}^+$ ); **HRMS** ( $\text{EI}^+$ ) calcd for  $[\text{C}_{23}\text{H}_{16}\text{F}_3\text{NO}_3]$ :  $m/z$  411.1082, found 411.1084.

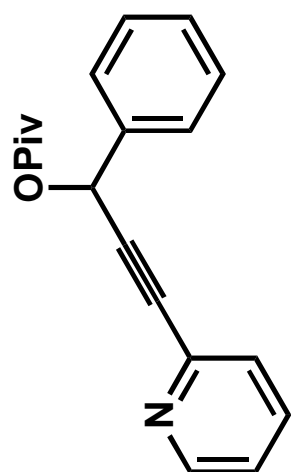

**18b**

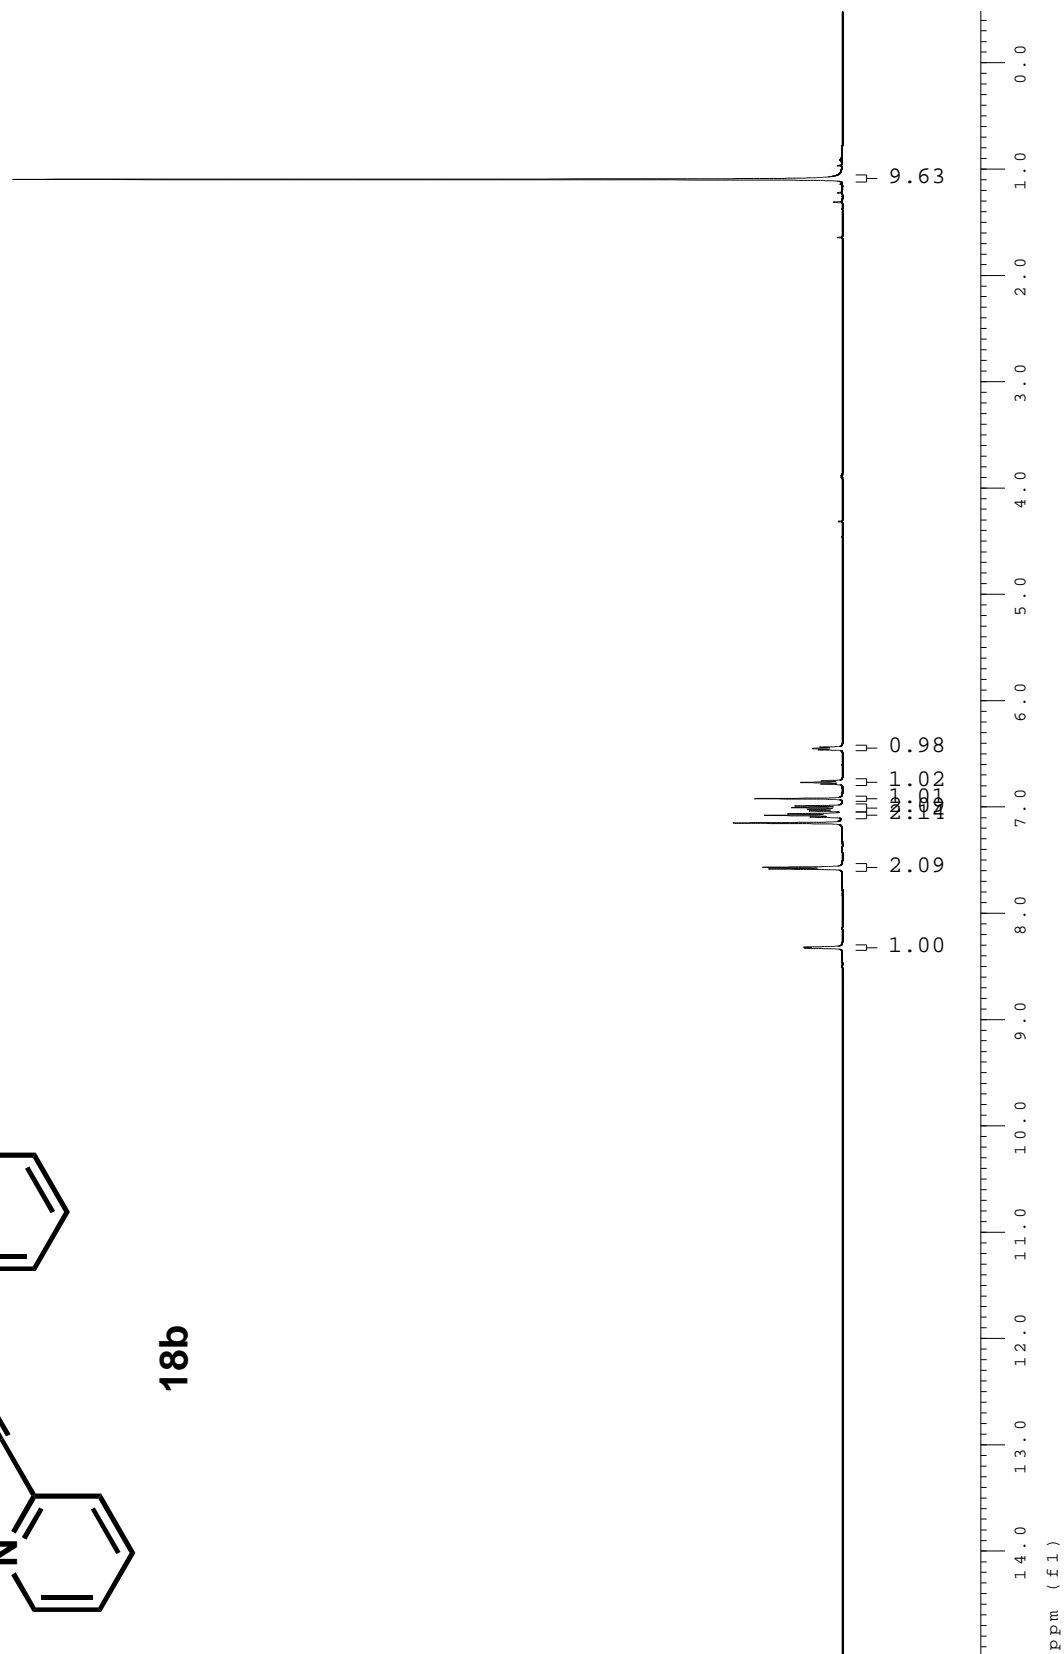

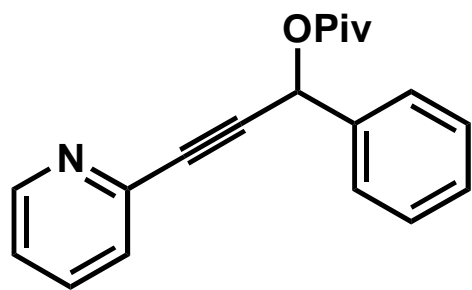

18b

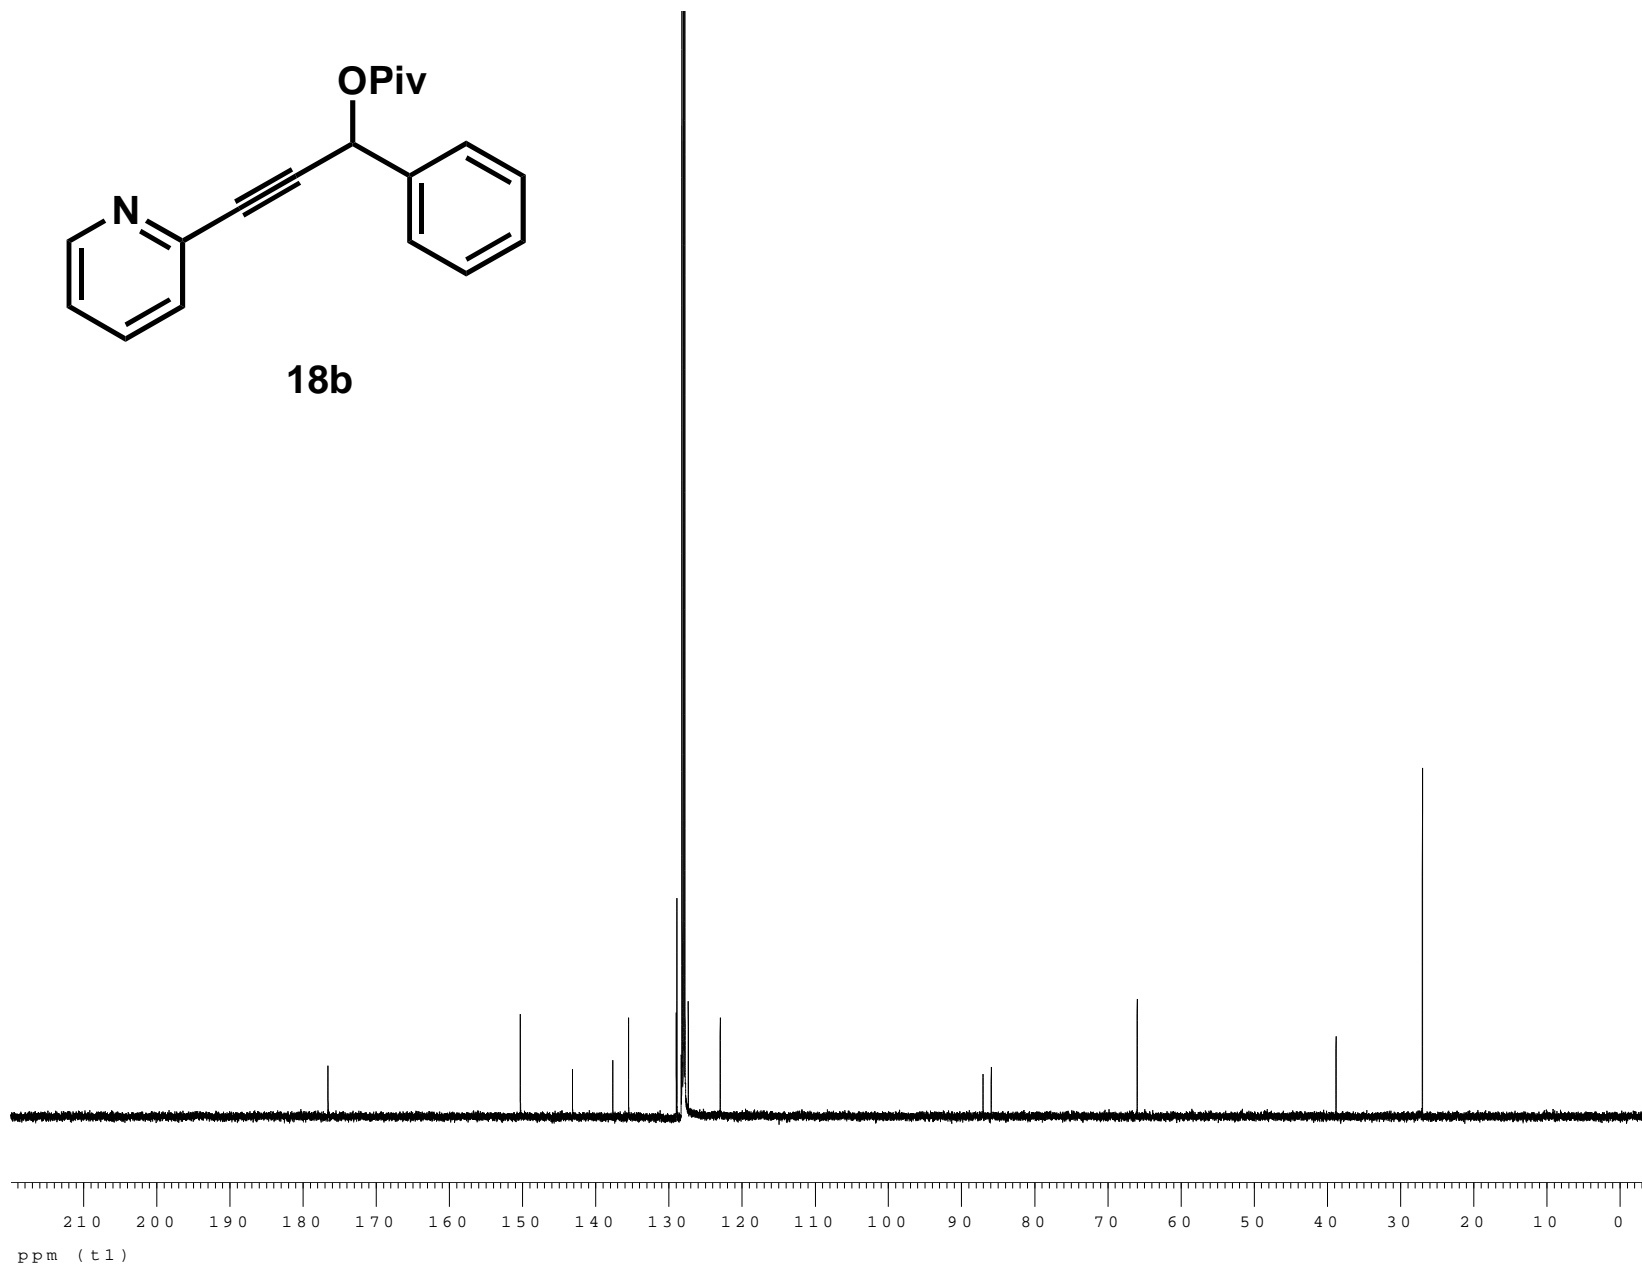

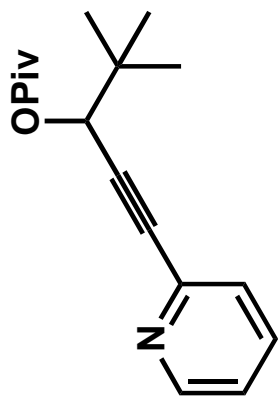

Table 2, entry 1

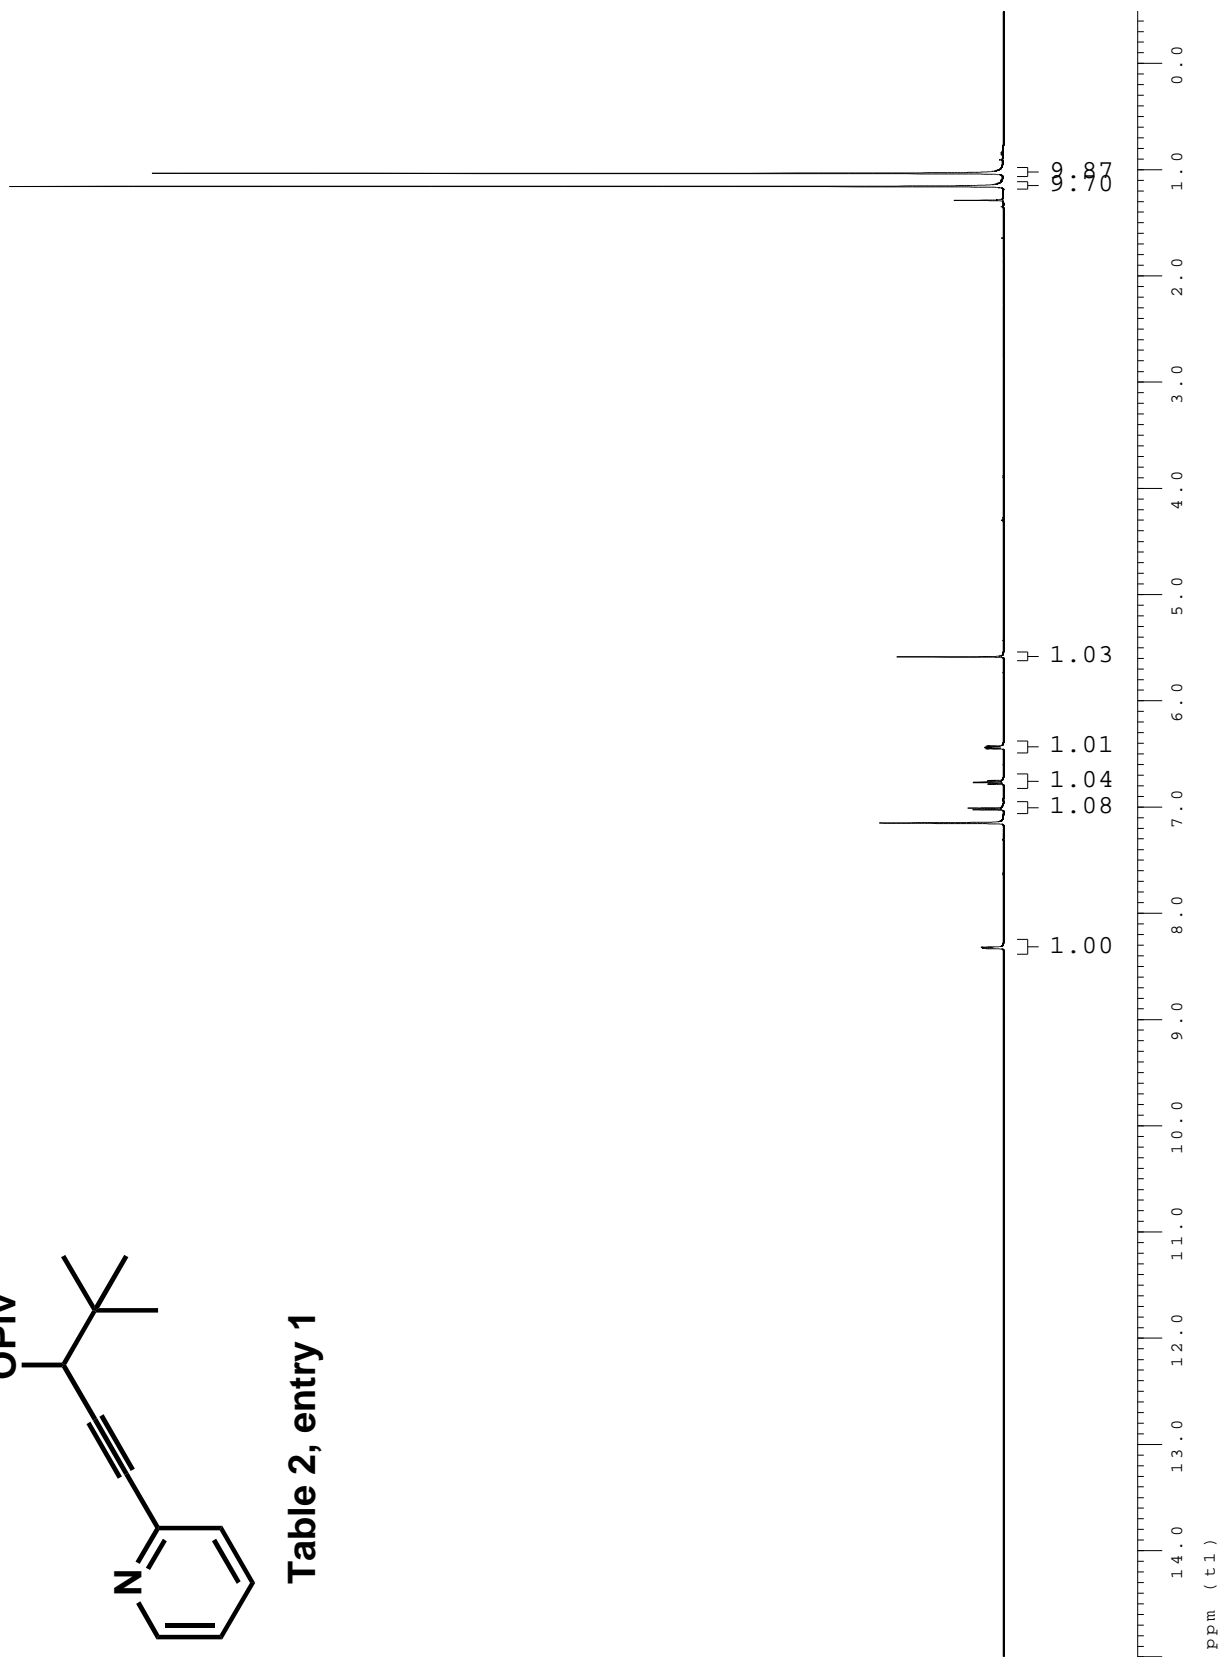

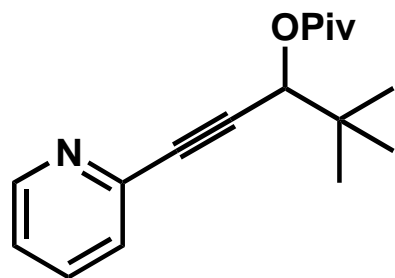

Table 2, entry 1

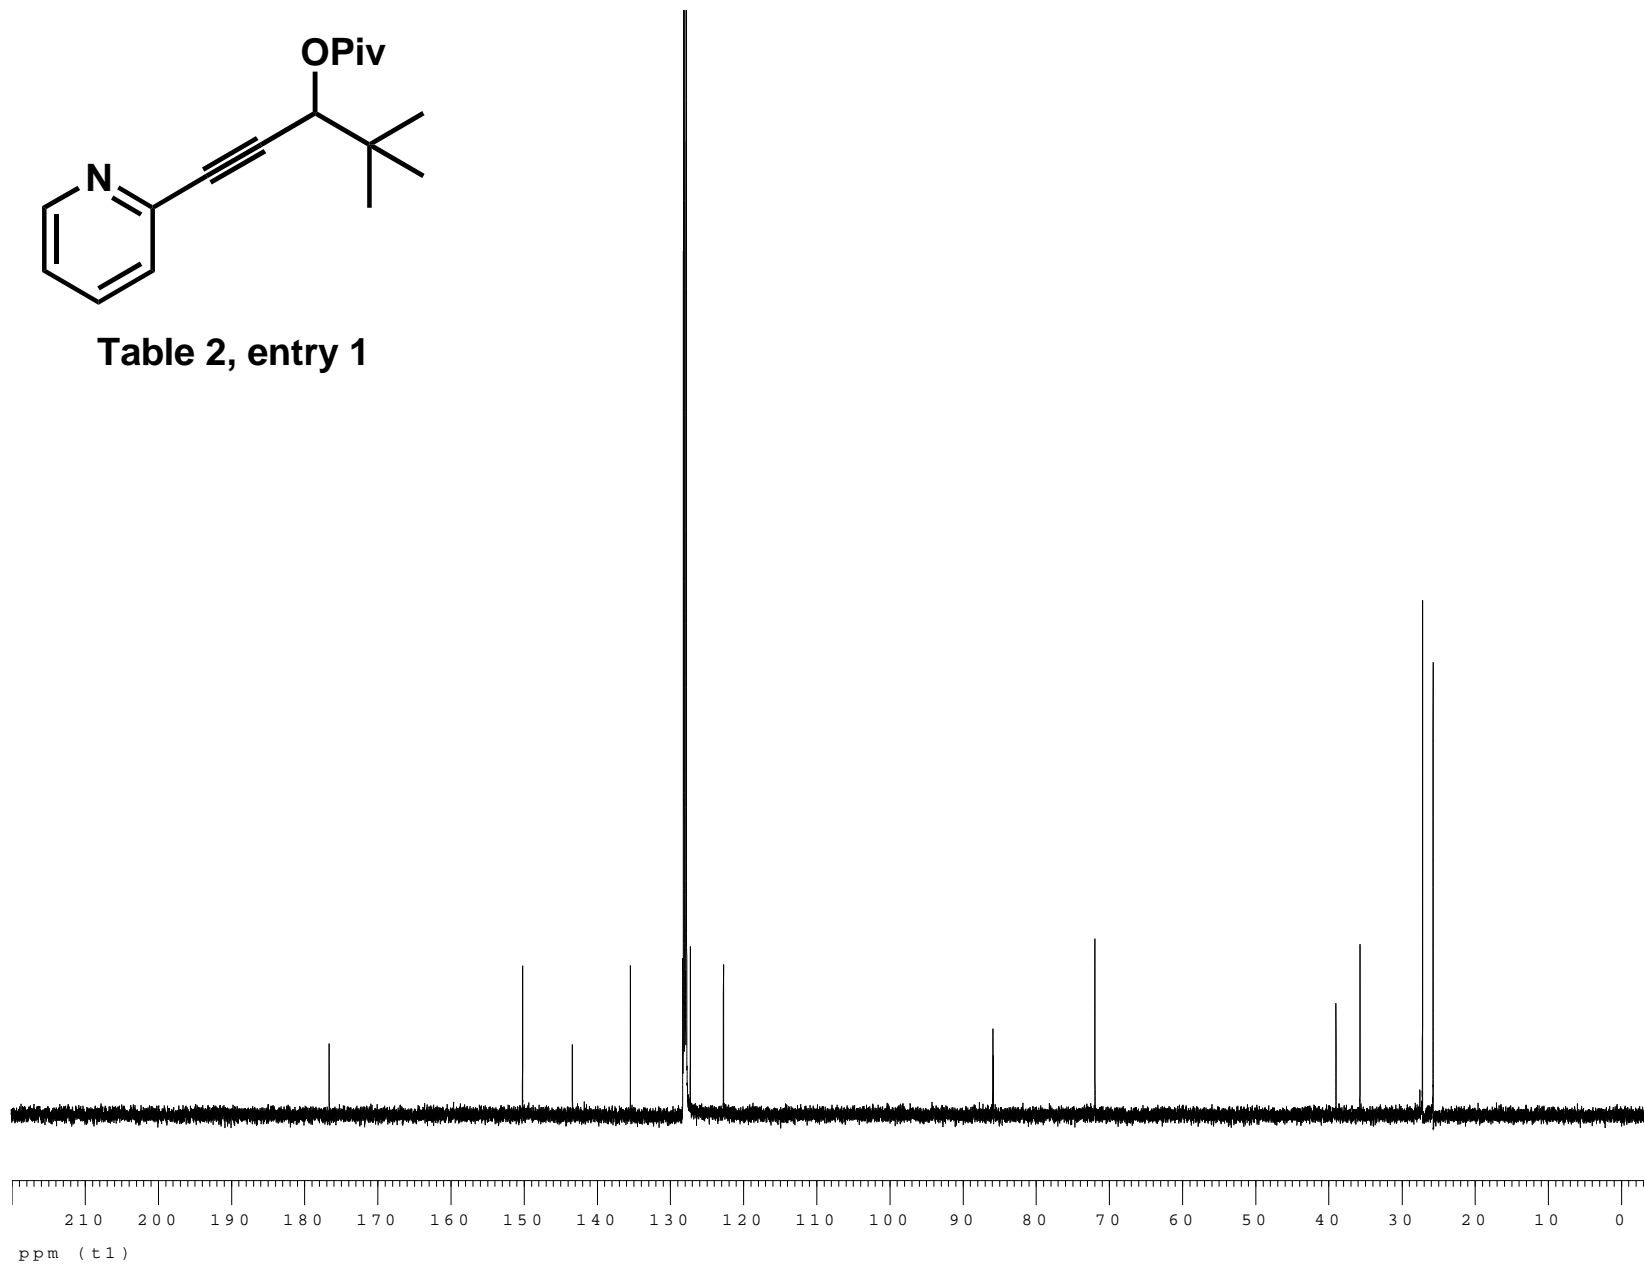

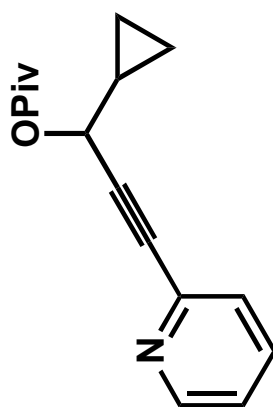

Table 2, entry 2

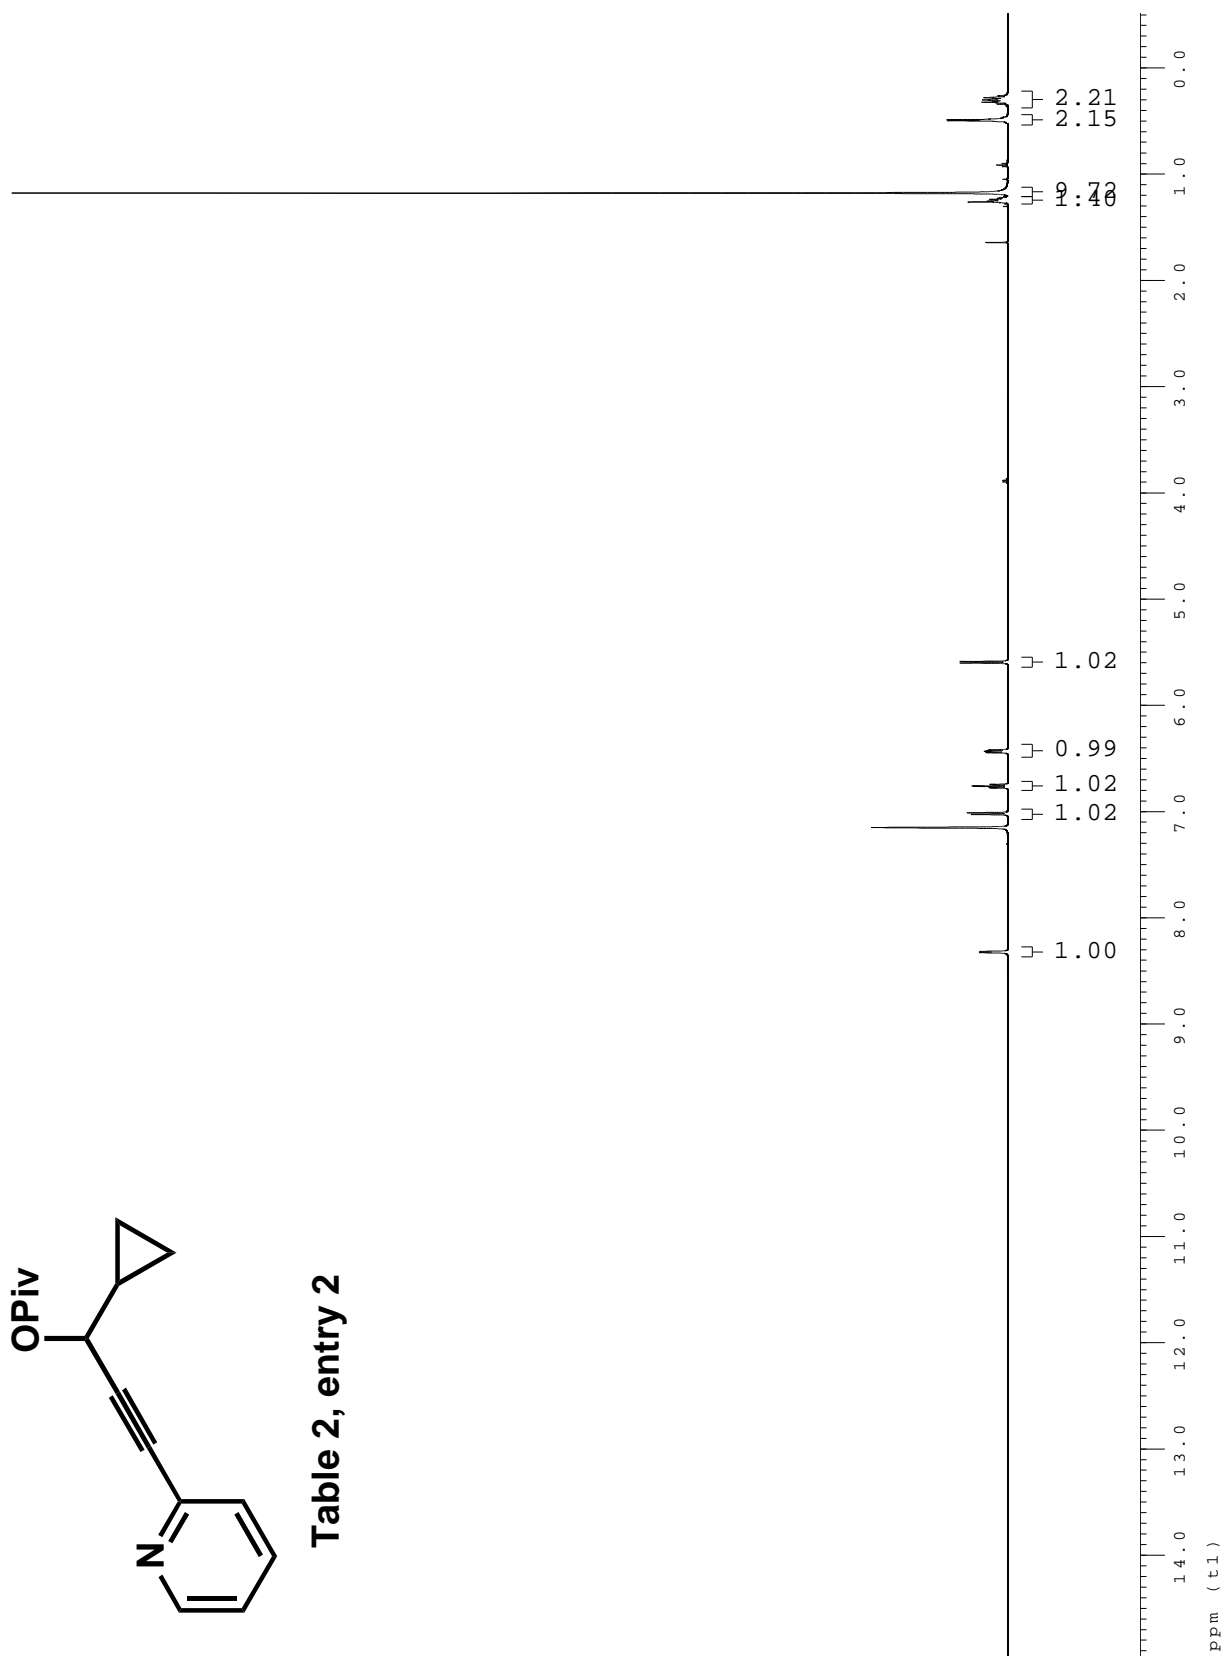

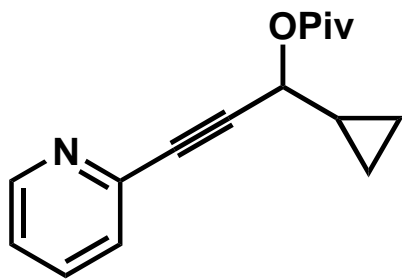

Table 2, entry 2

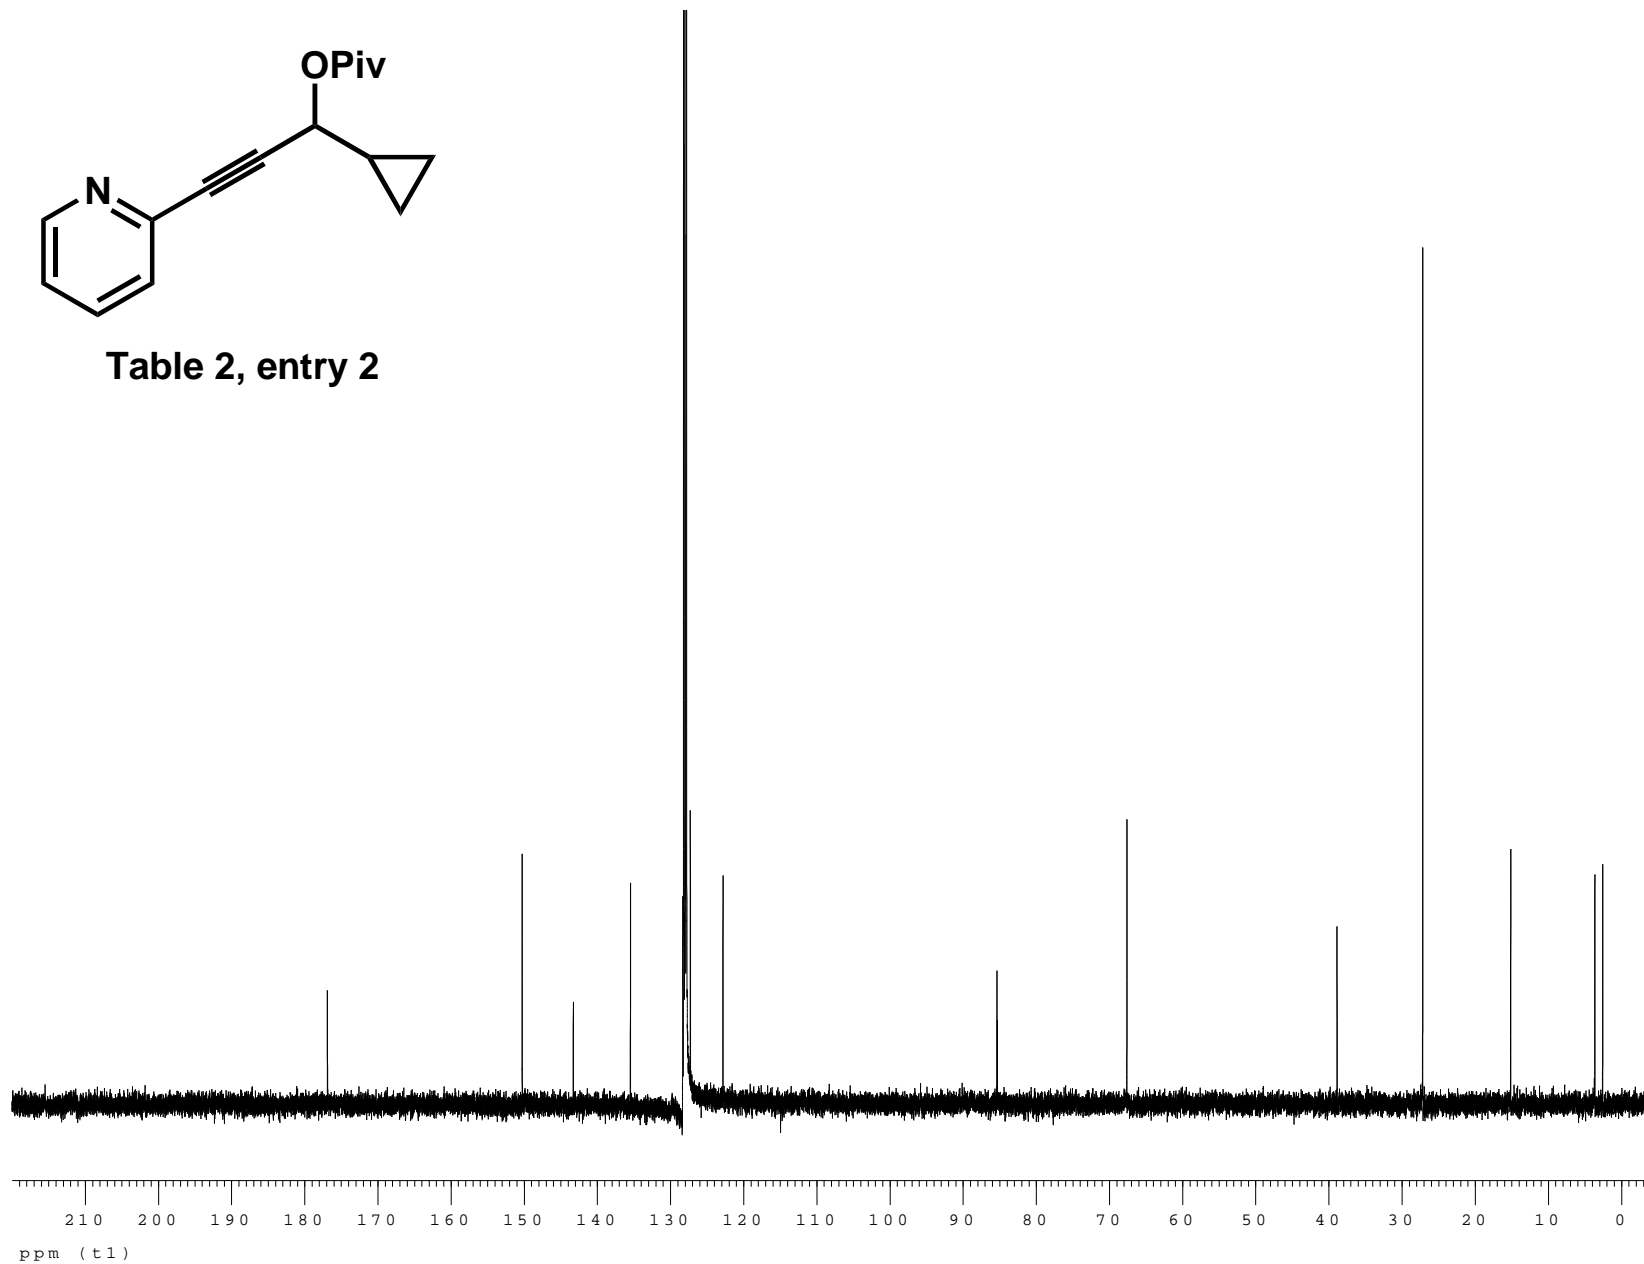

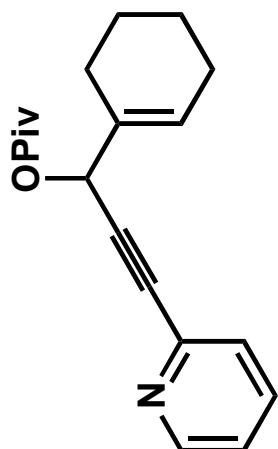

Table 2, entry 3

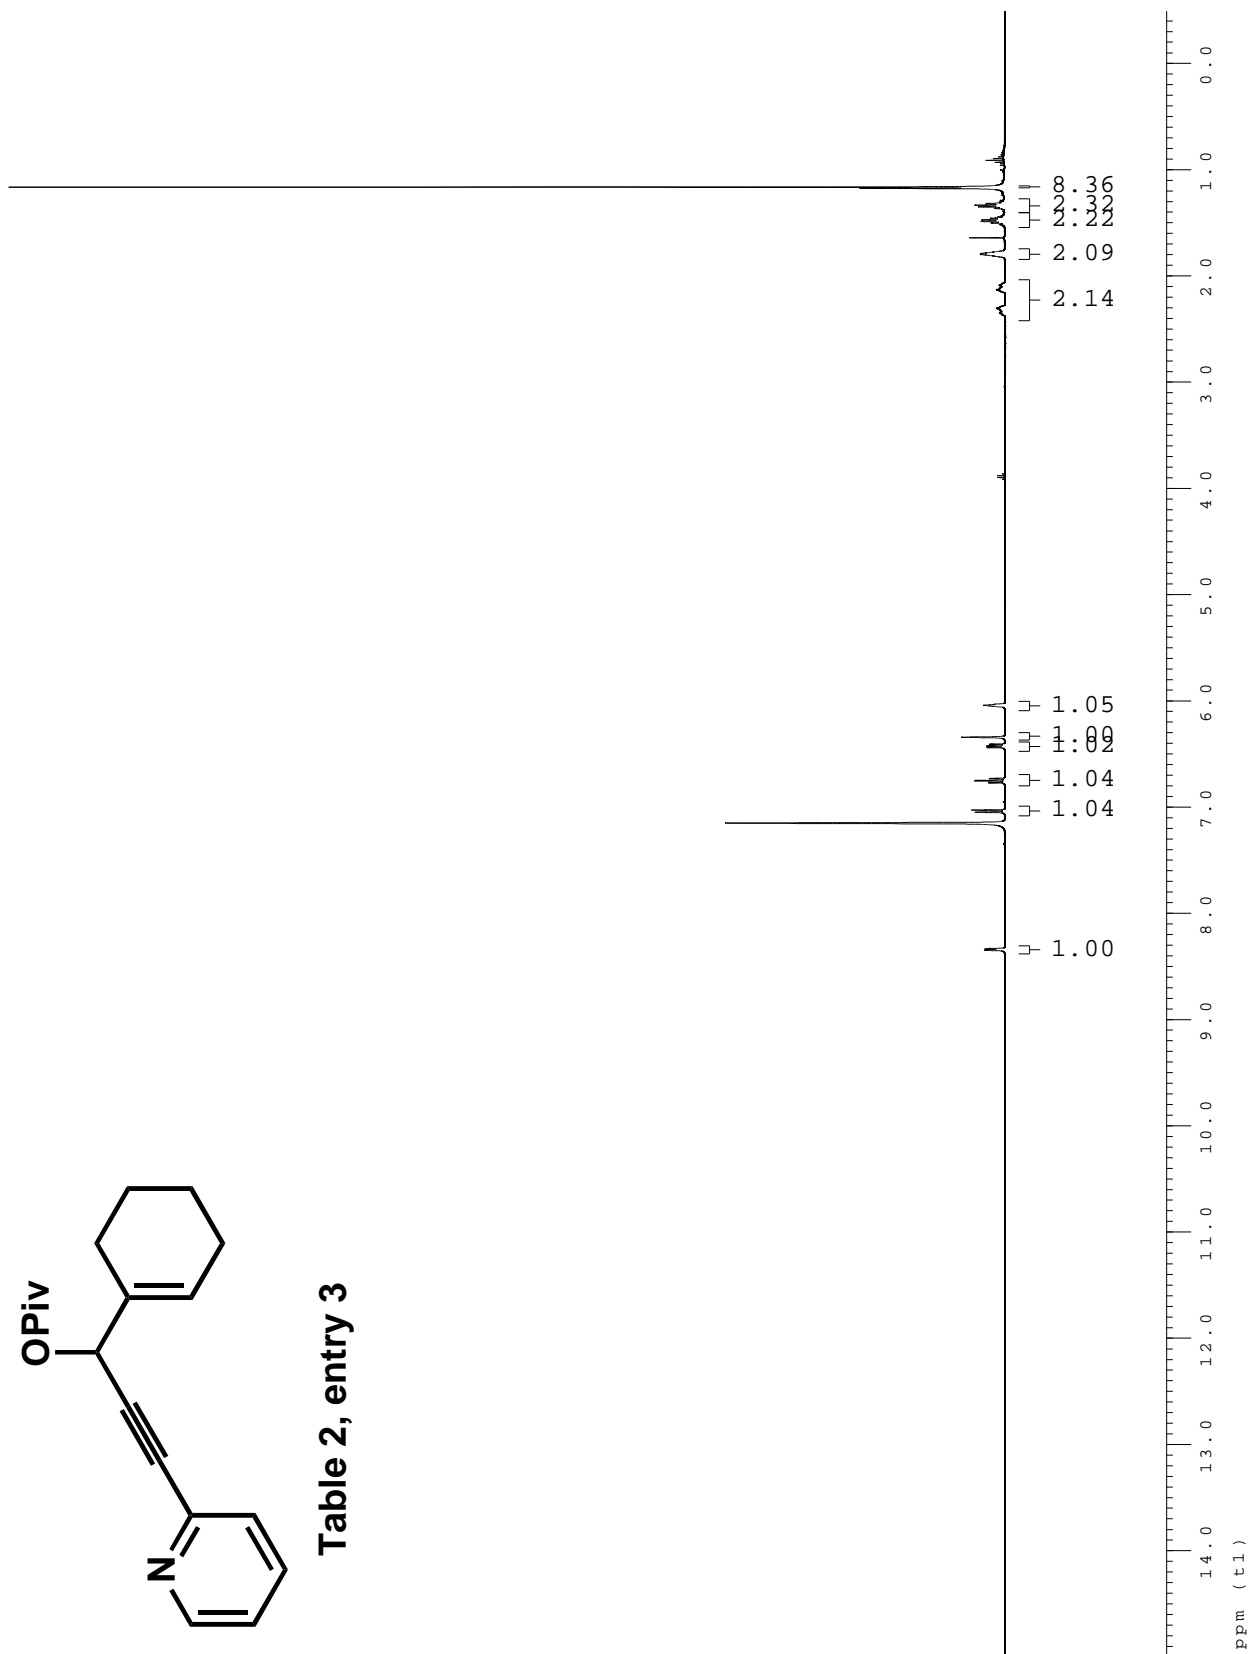



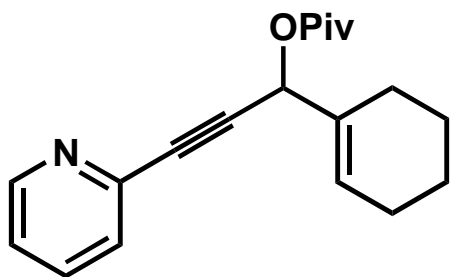

Table 2, entry 3

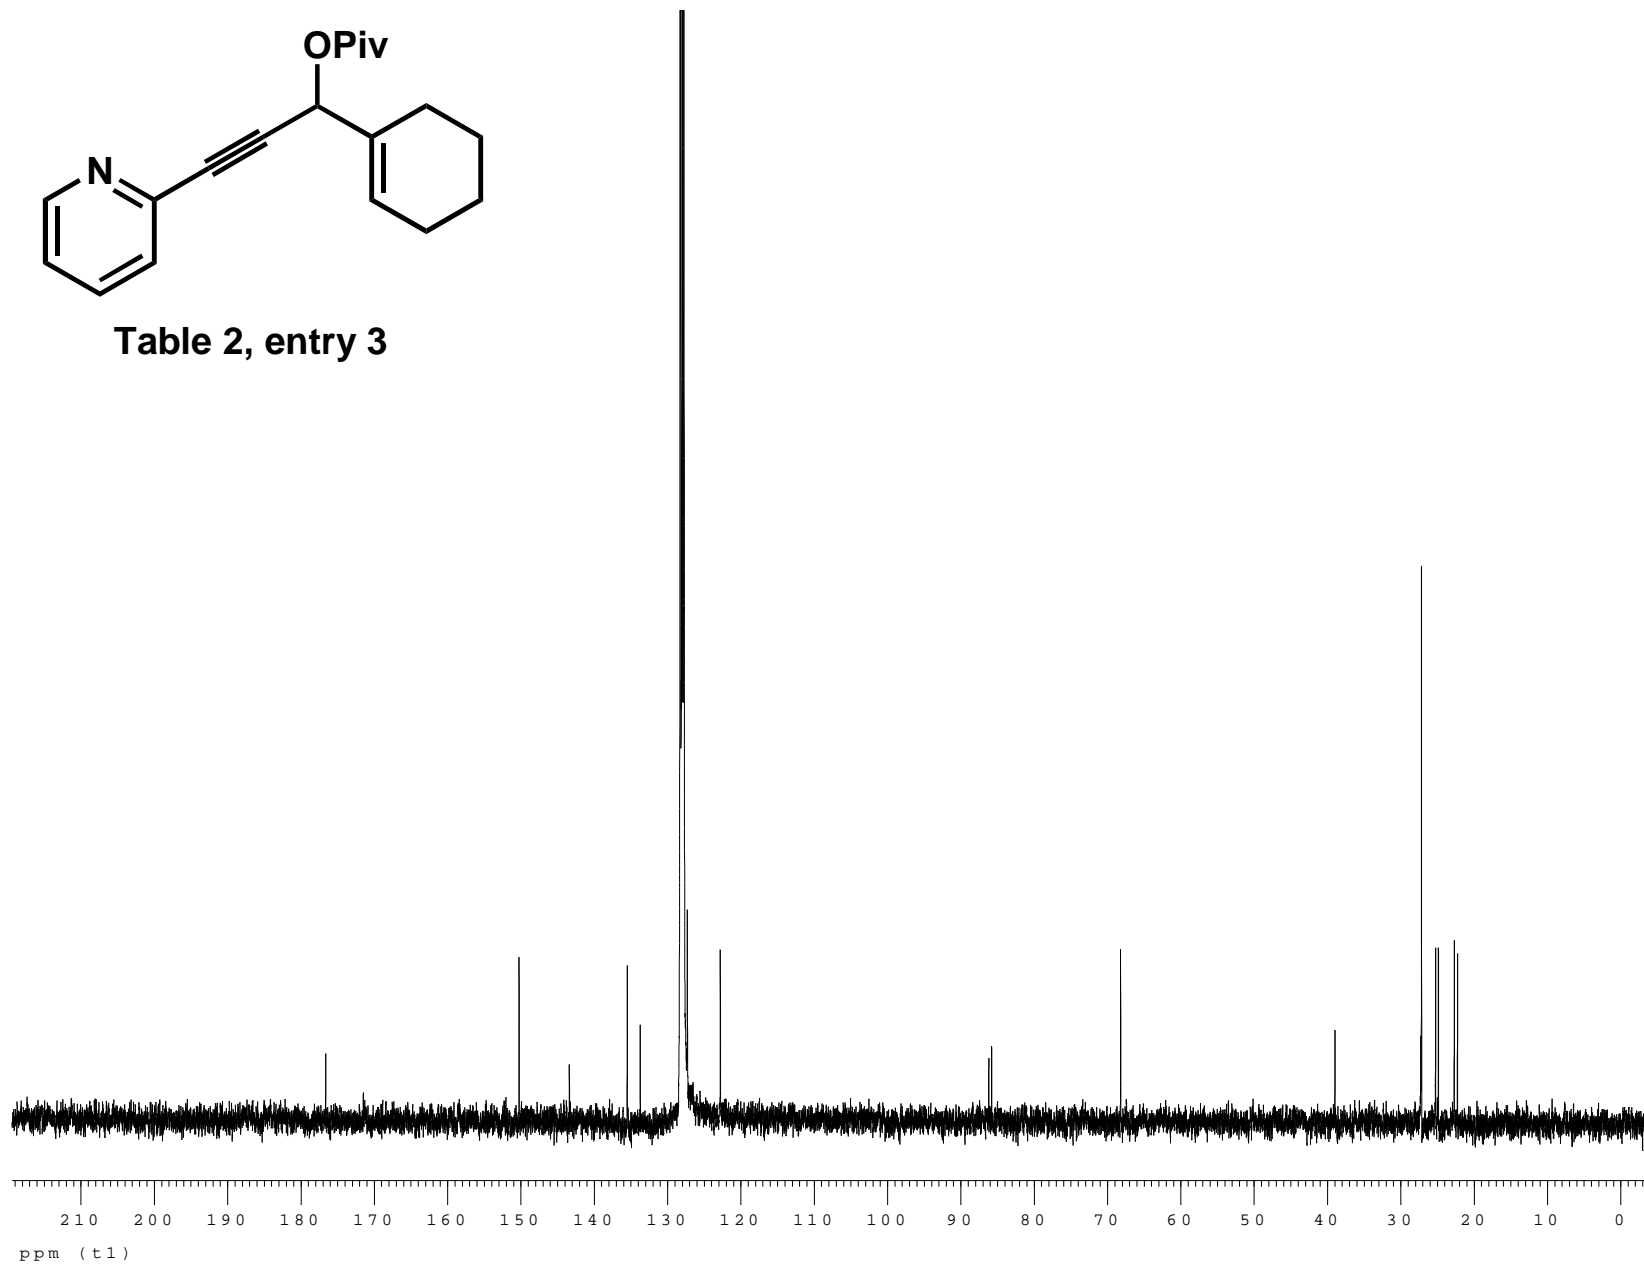

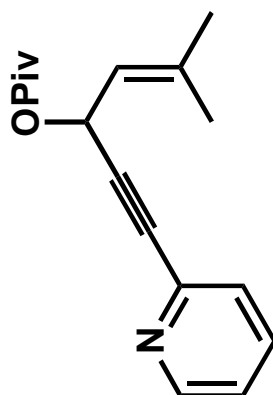

Table 2, entry 4

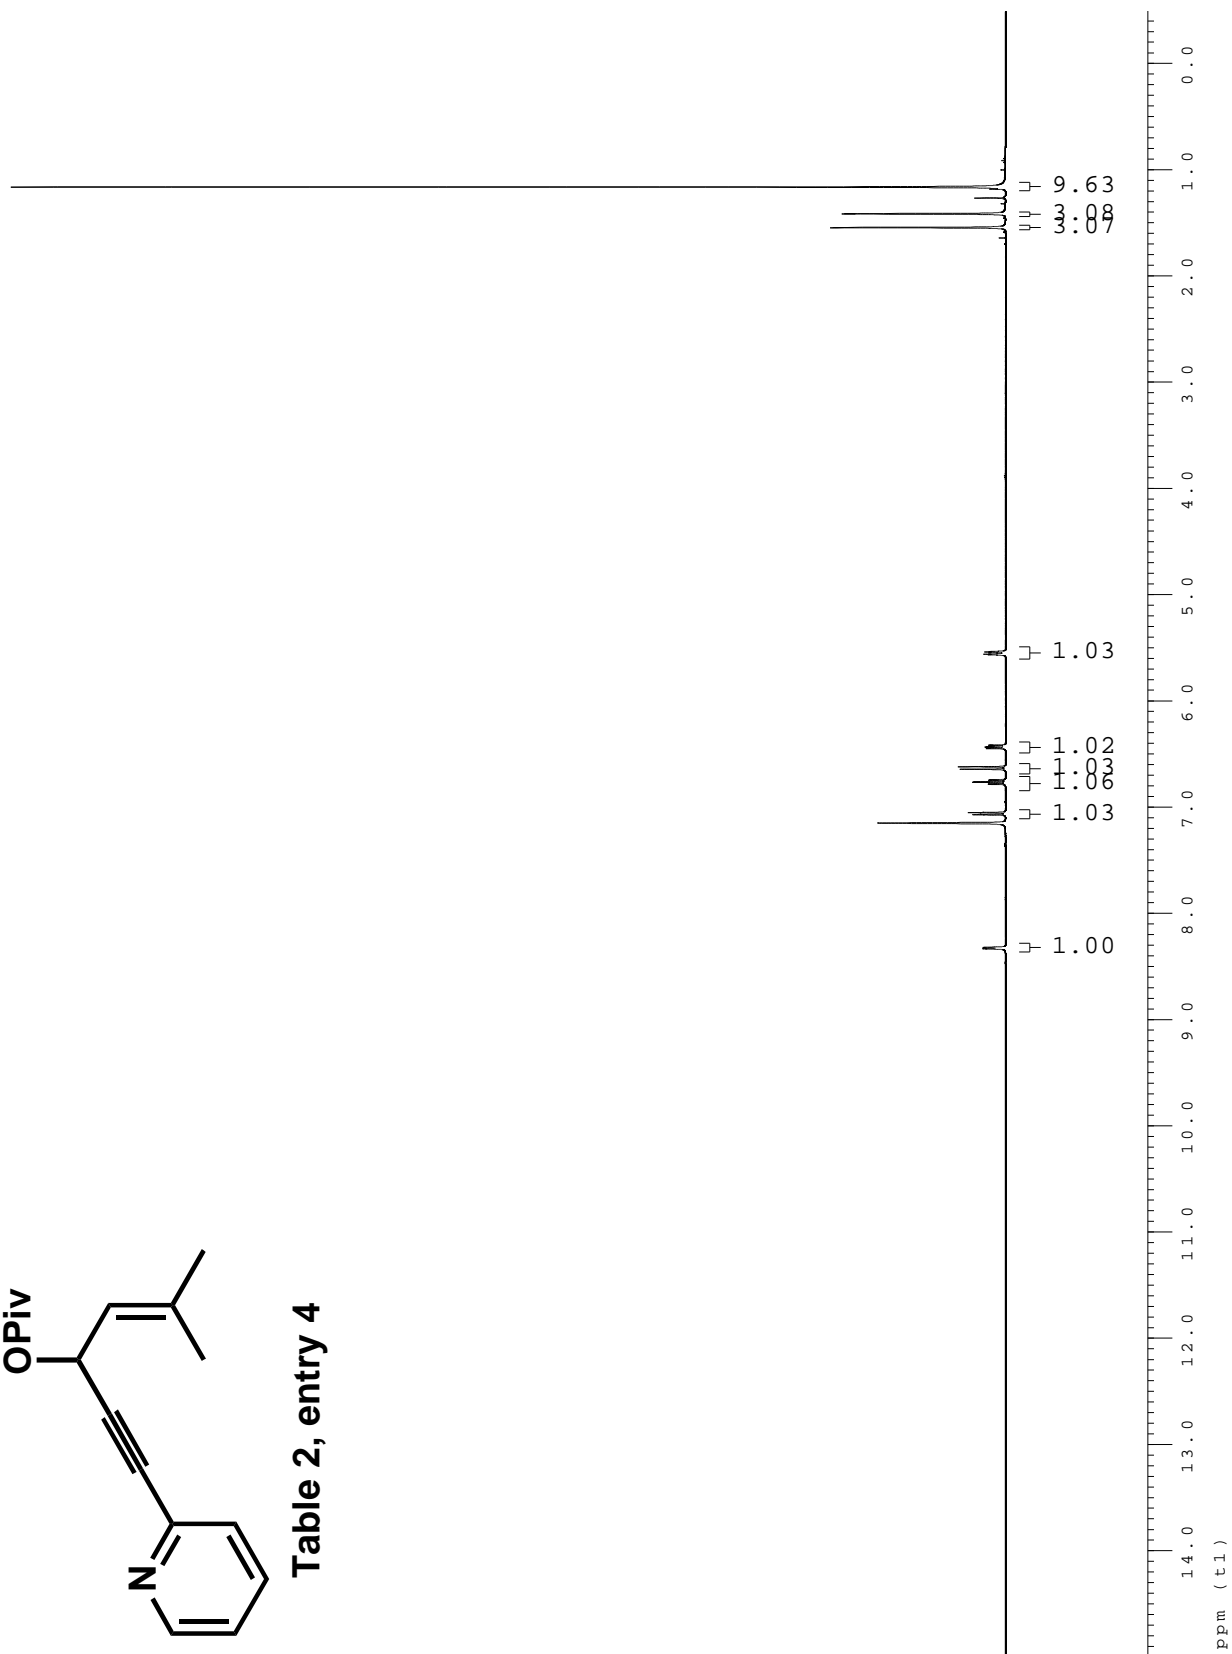

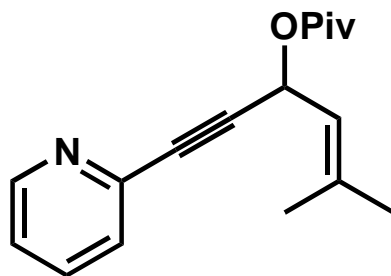

Table 2, entry 4

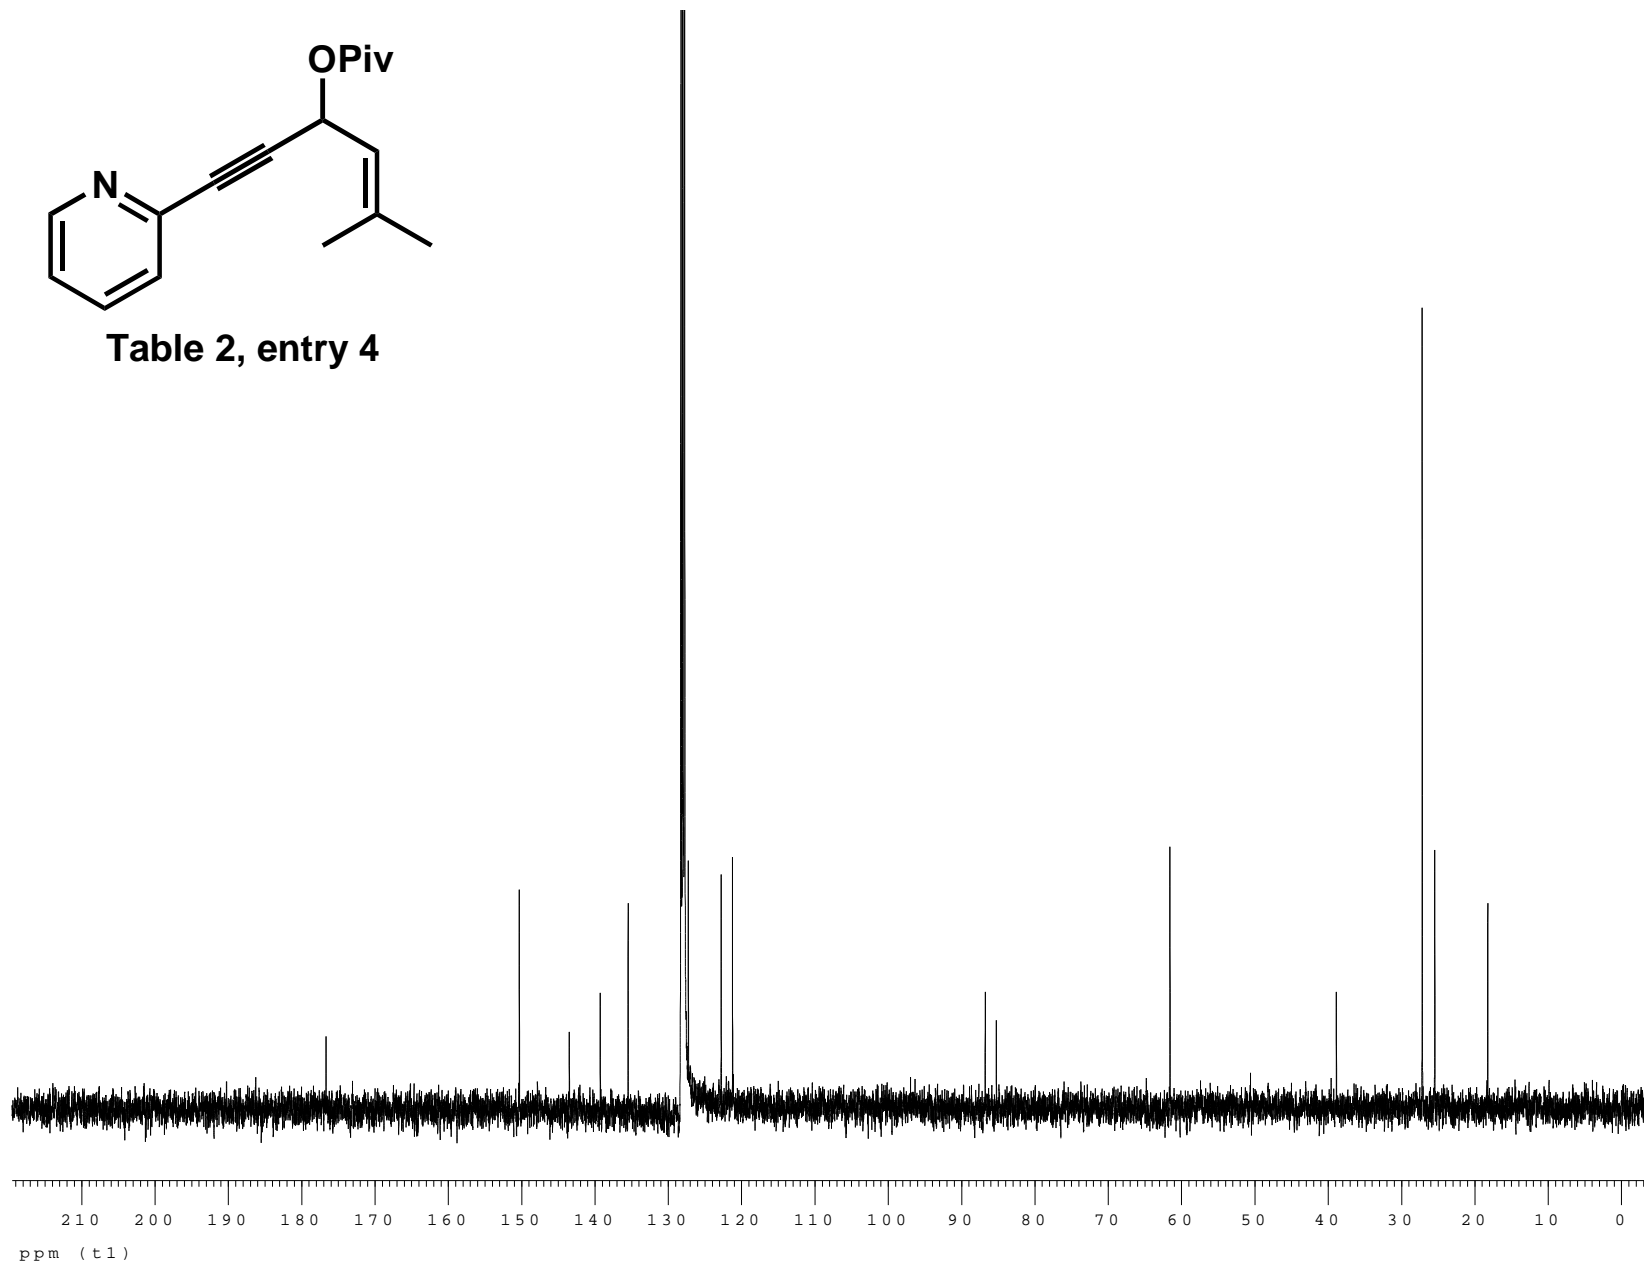

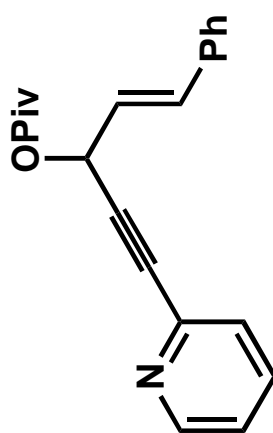

Table 2, entry 5

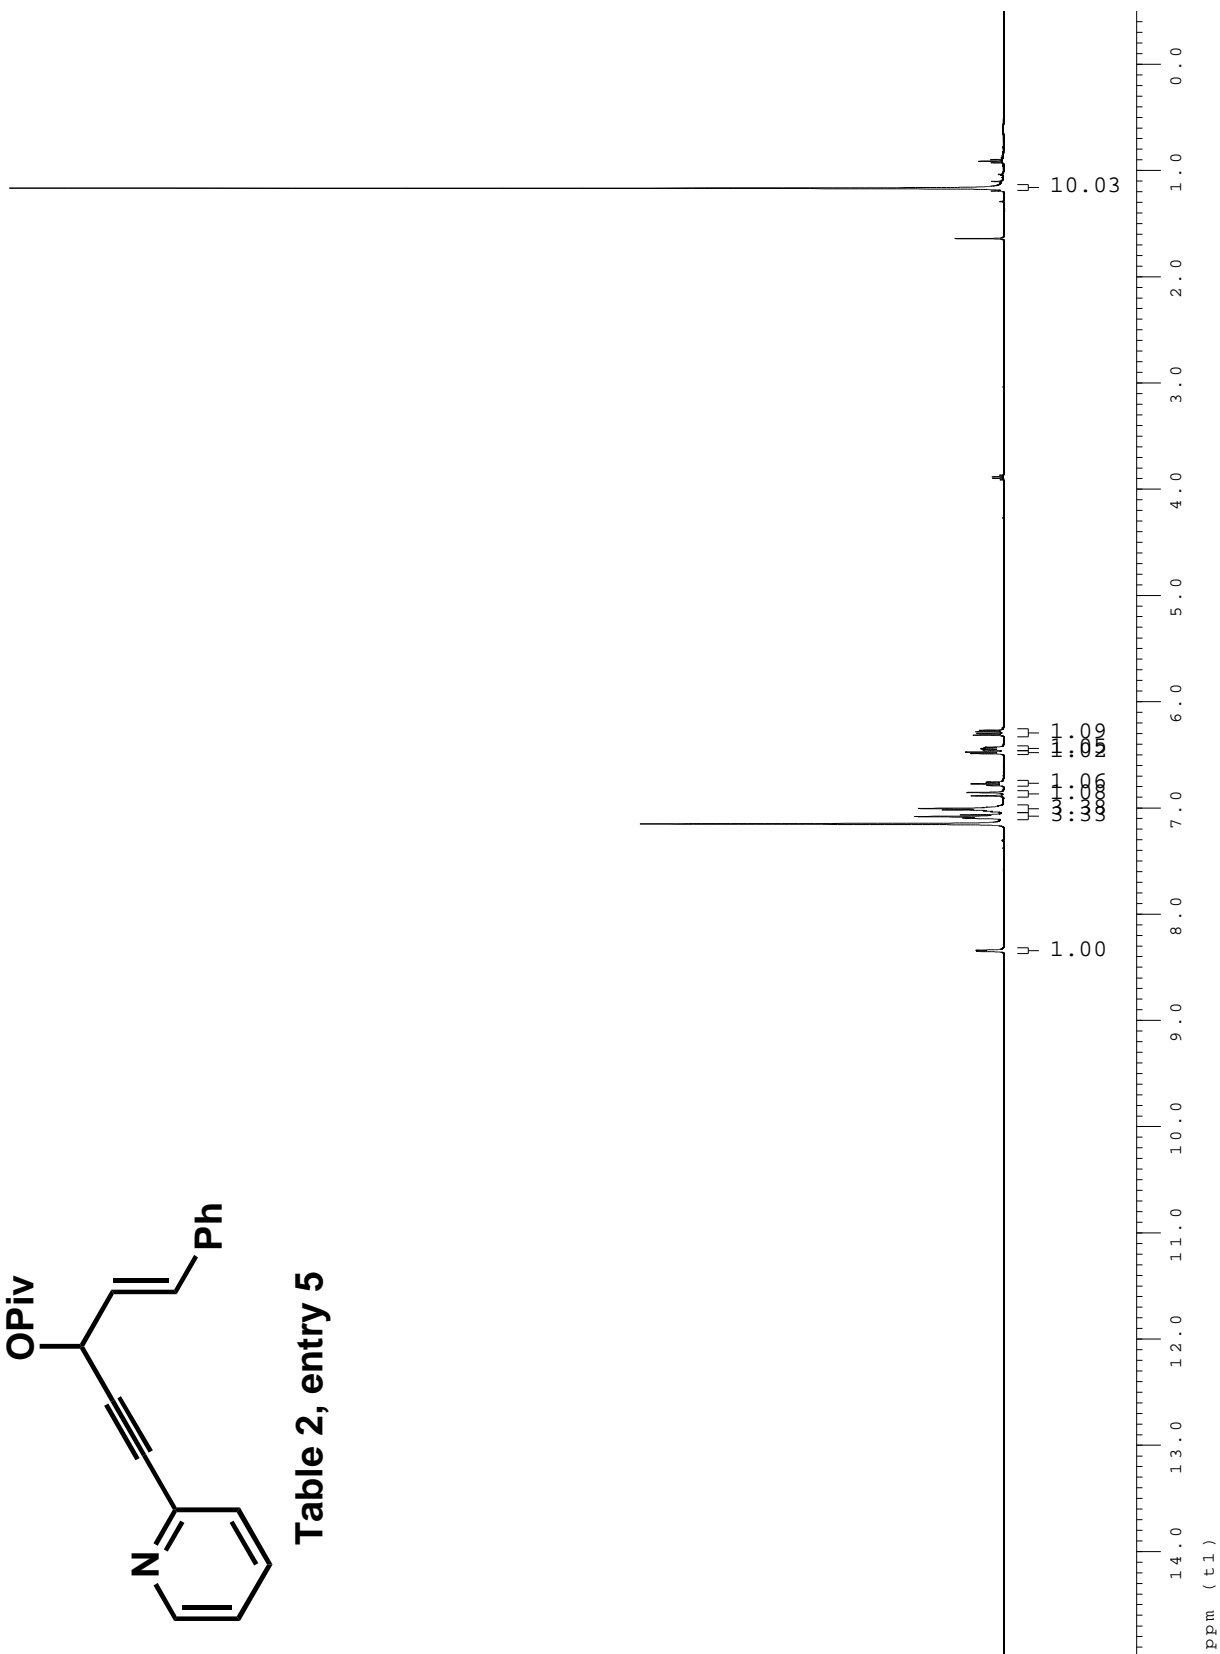

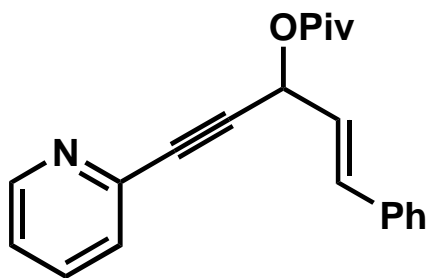

Table 2, entry 5

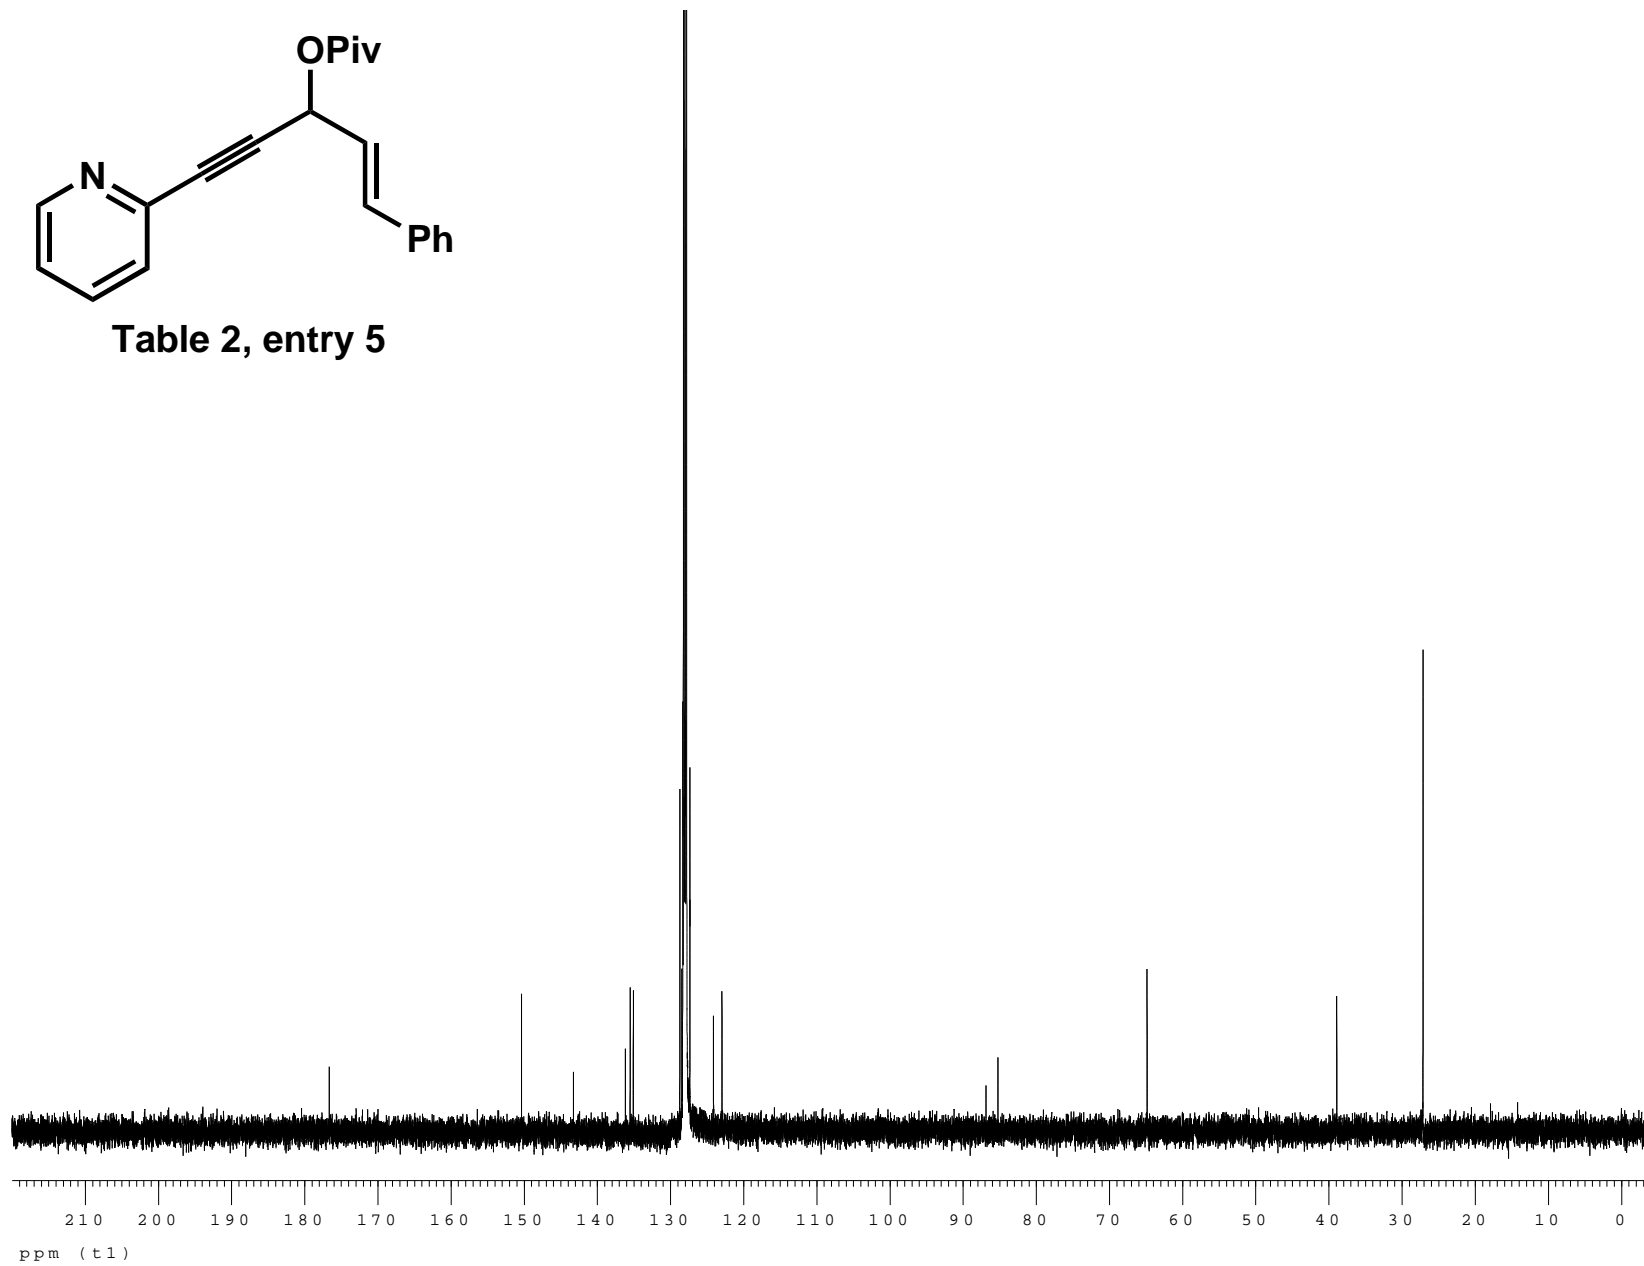

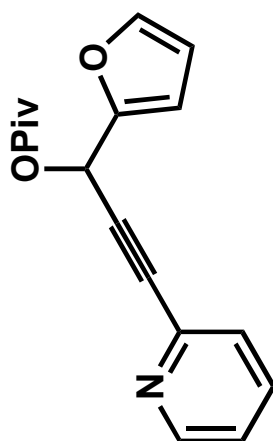

Table 2, entry 6

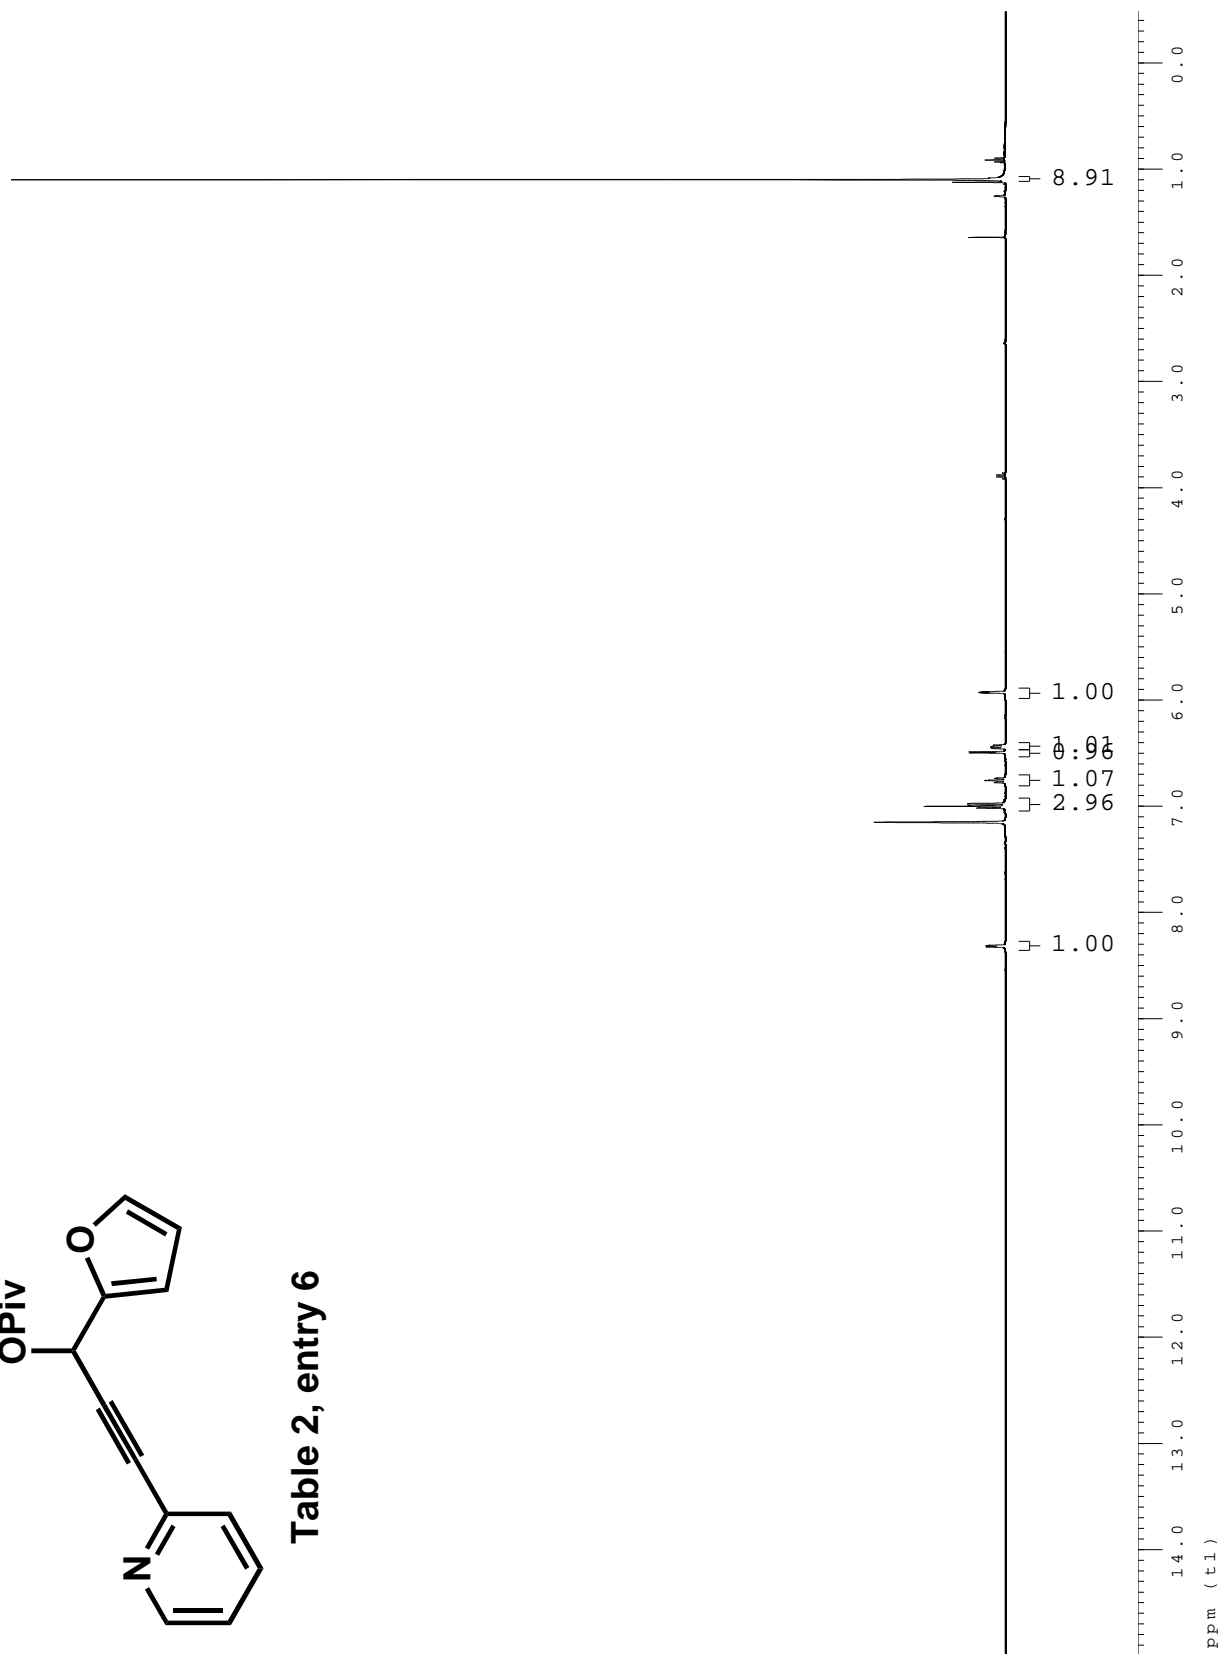

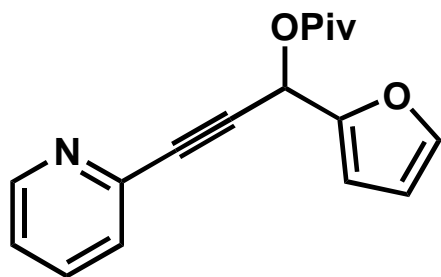

Table 2, entry 6

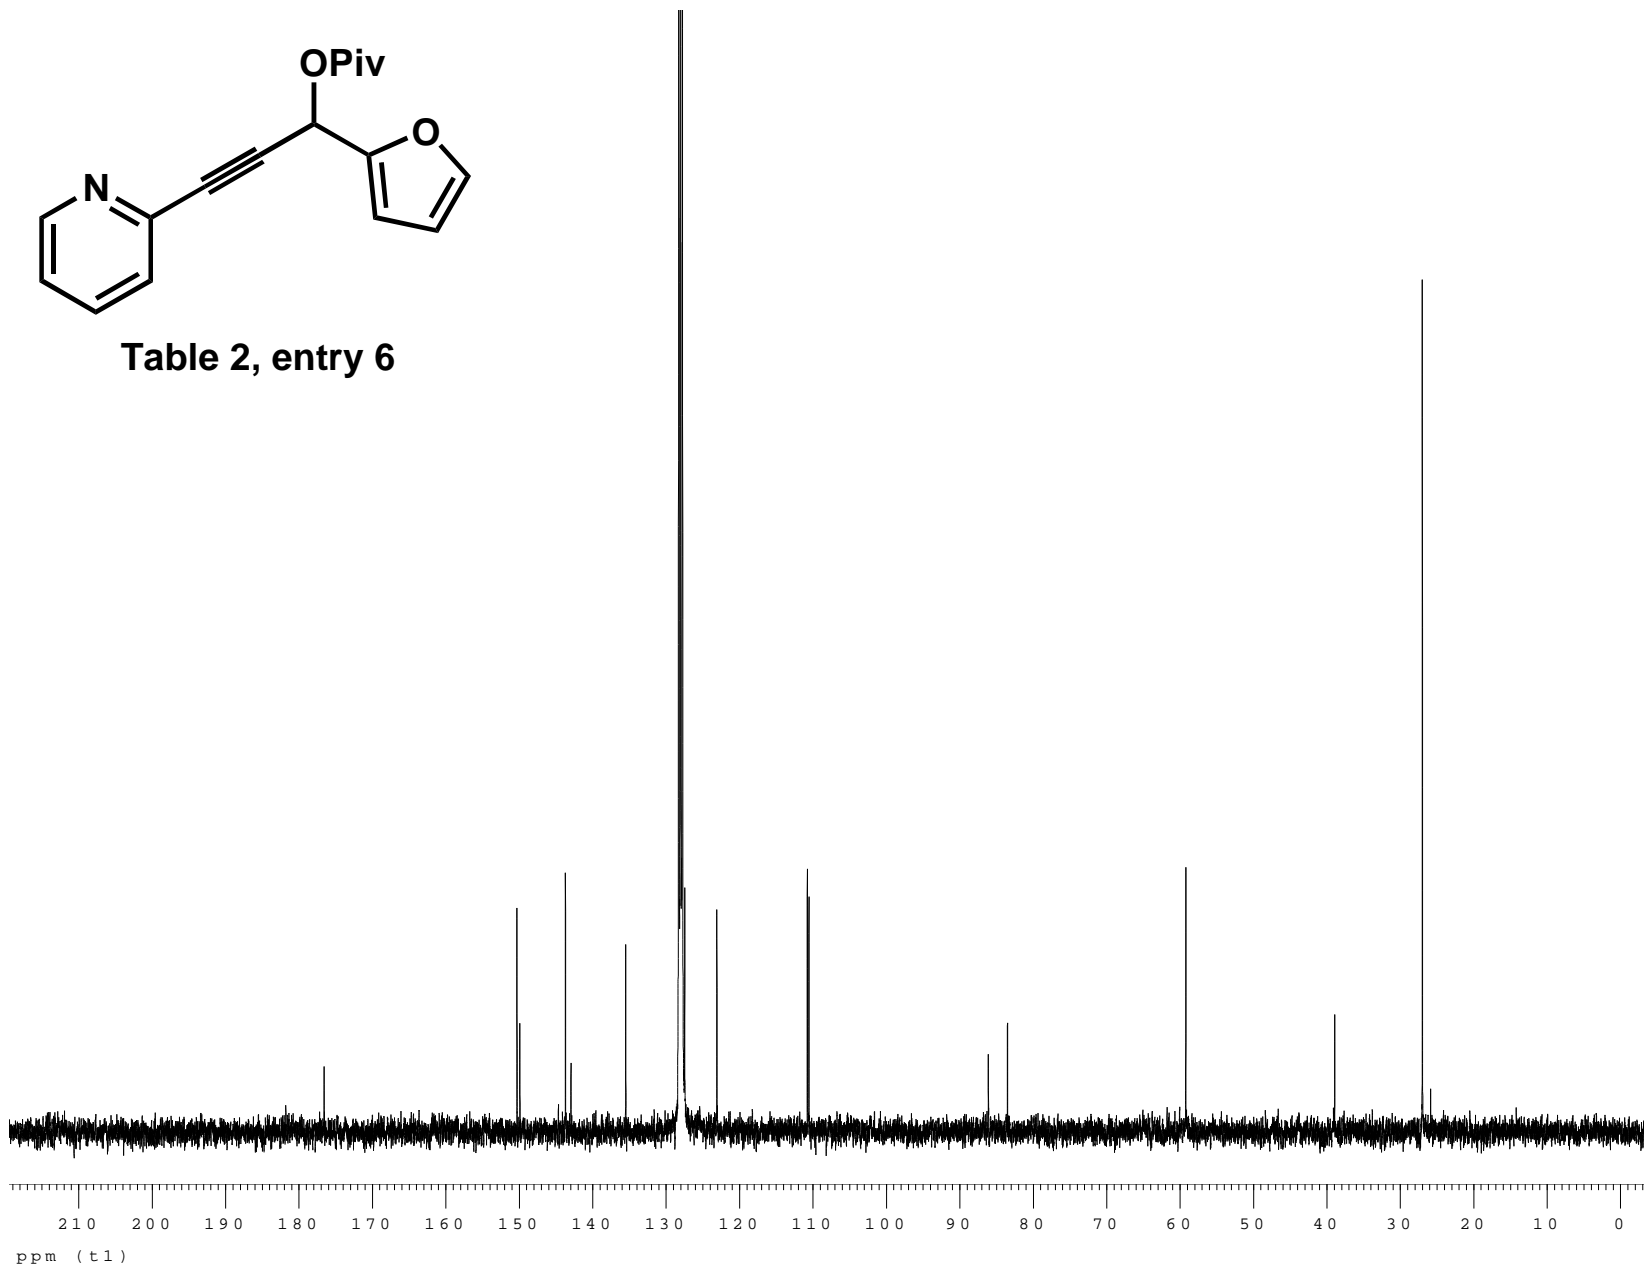

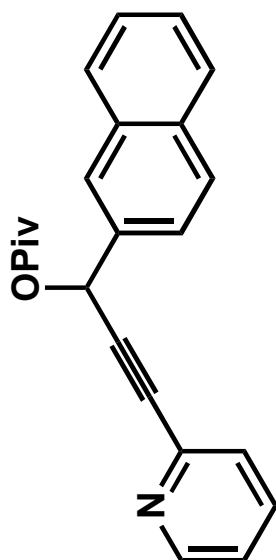

Table 2, entry 7

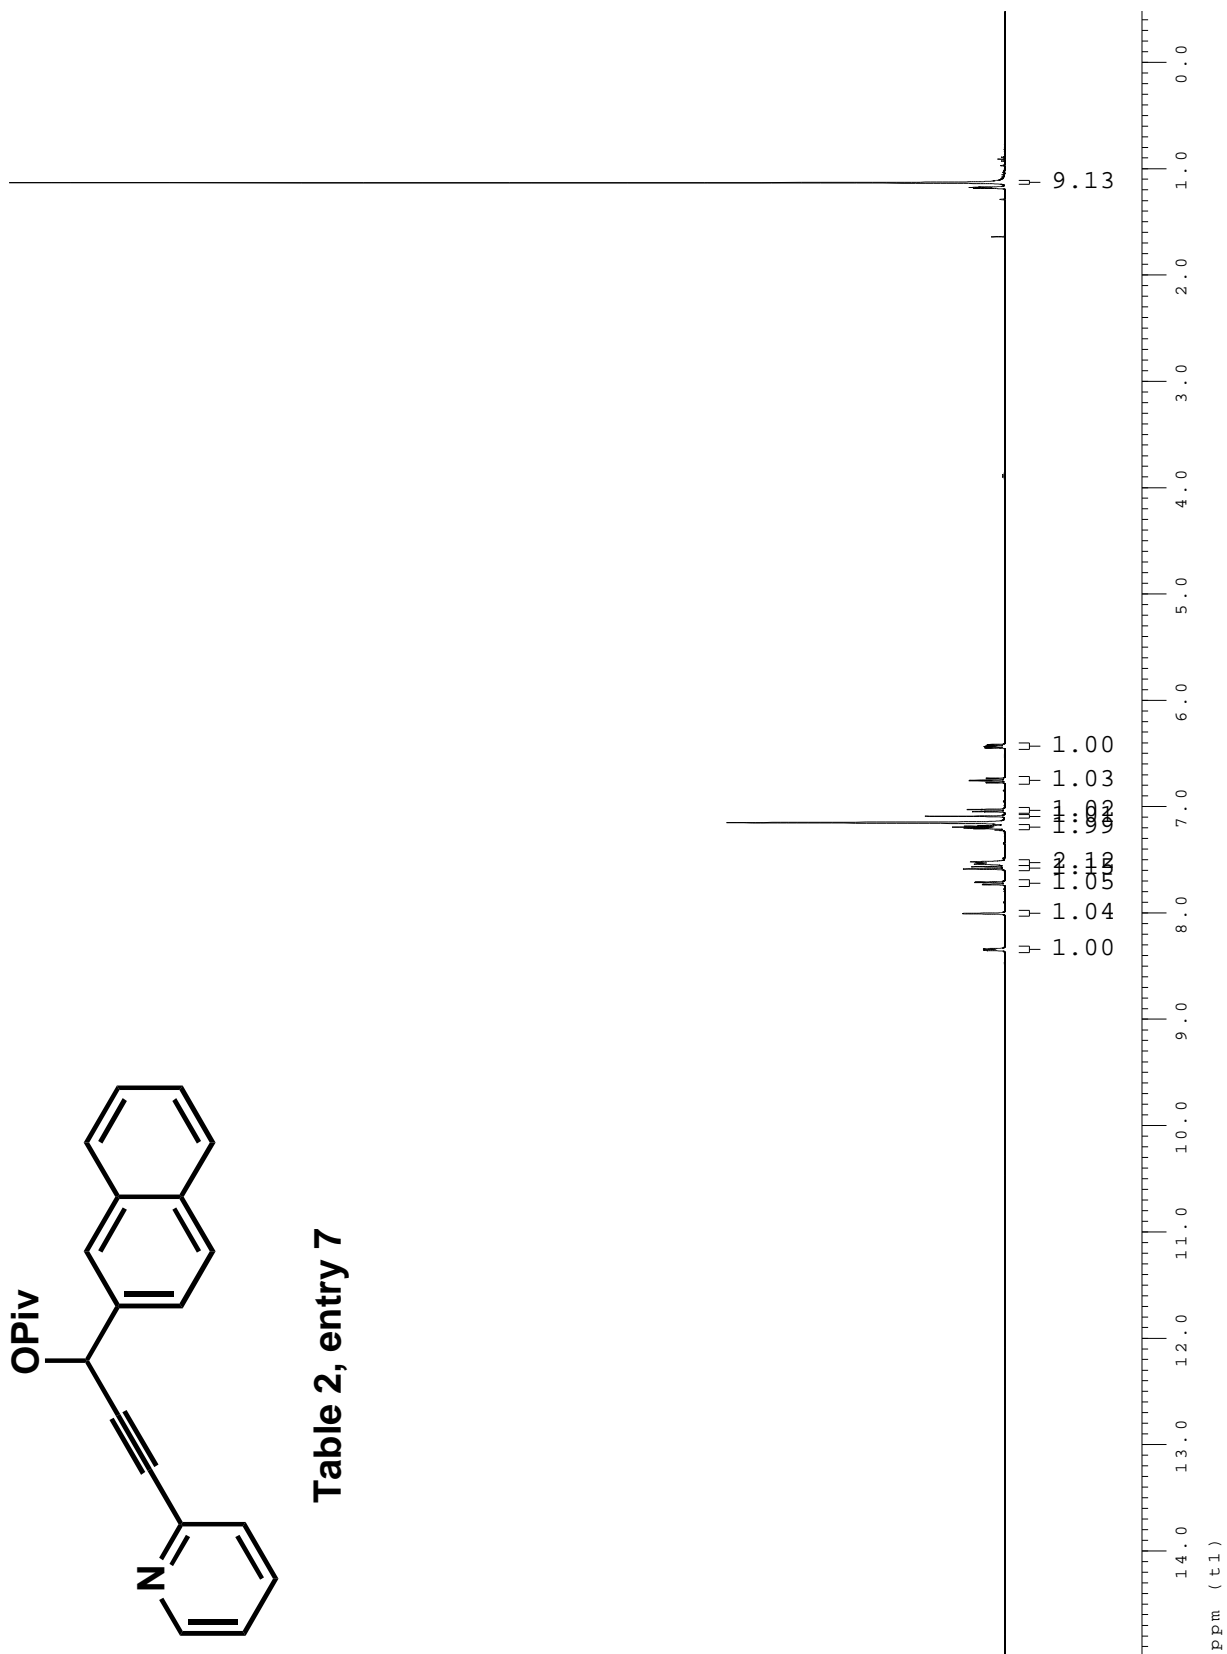



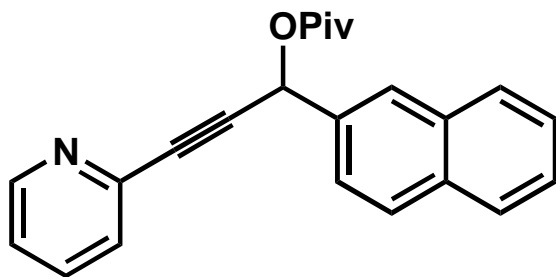

Table 2, entry 7

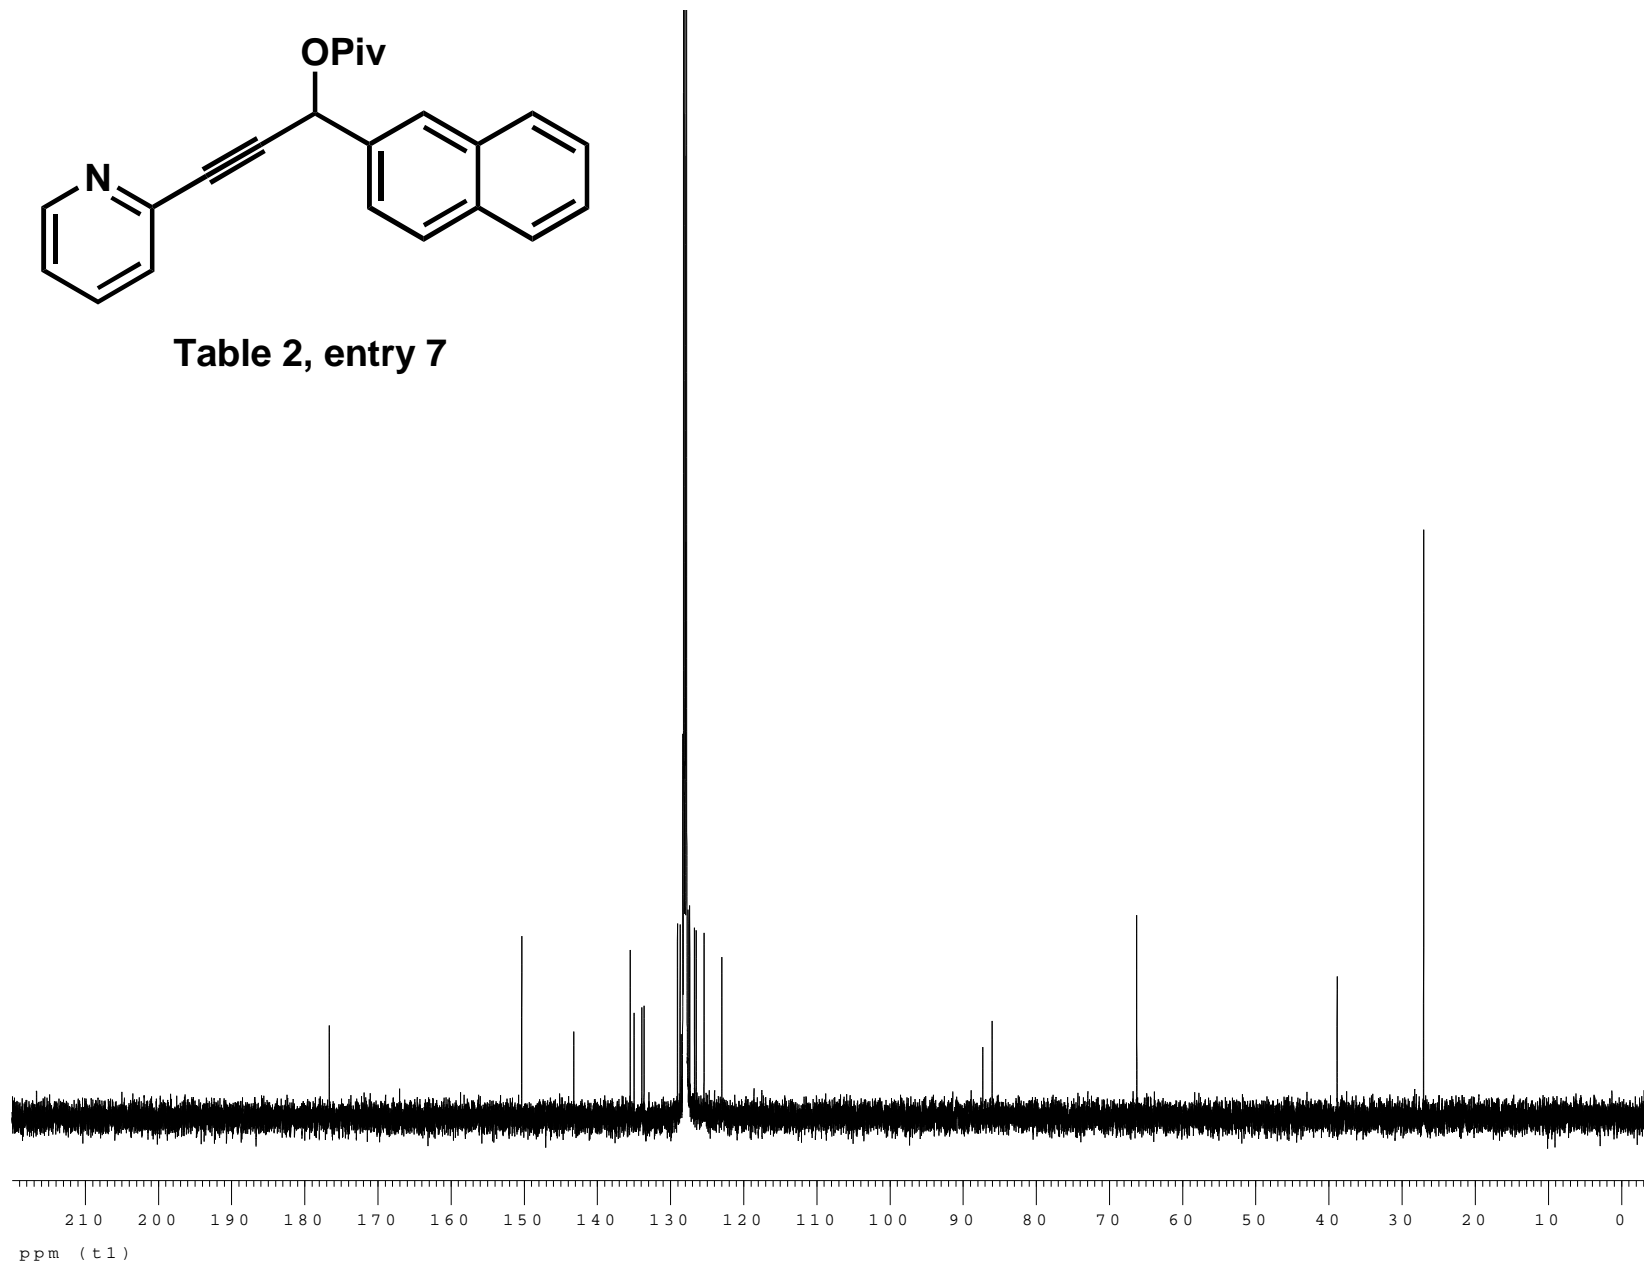

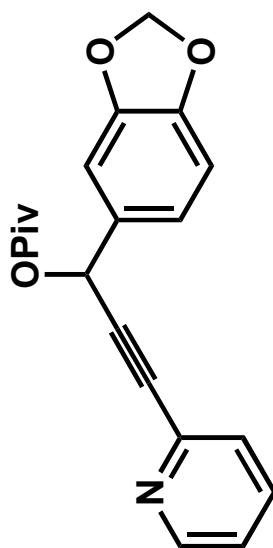

Table 2, entry 8

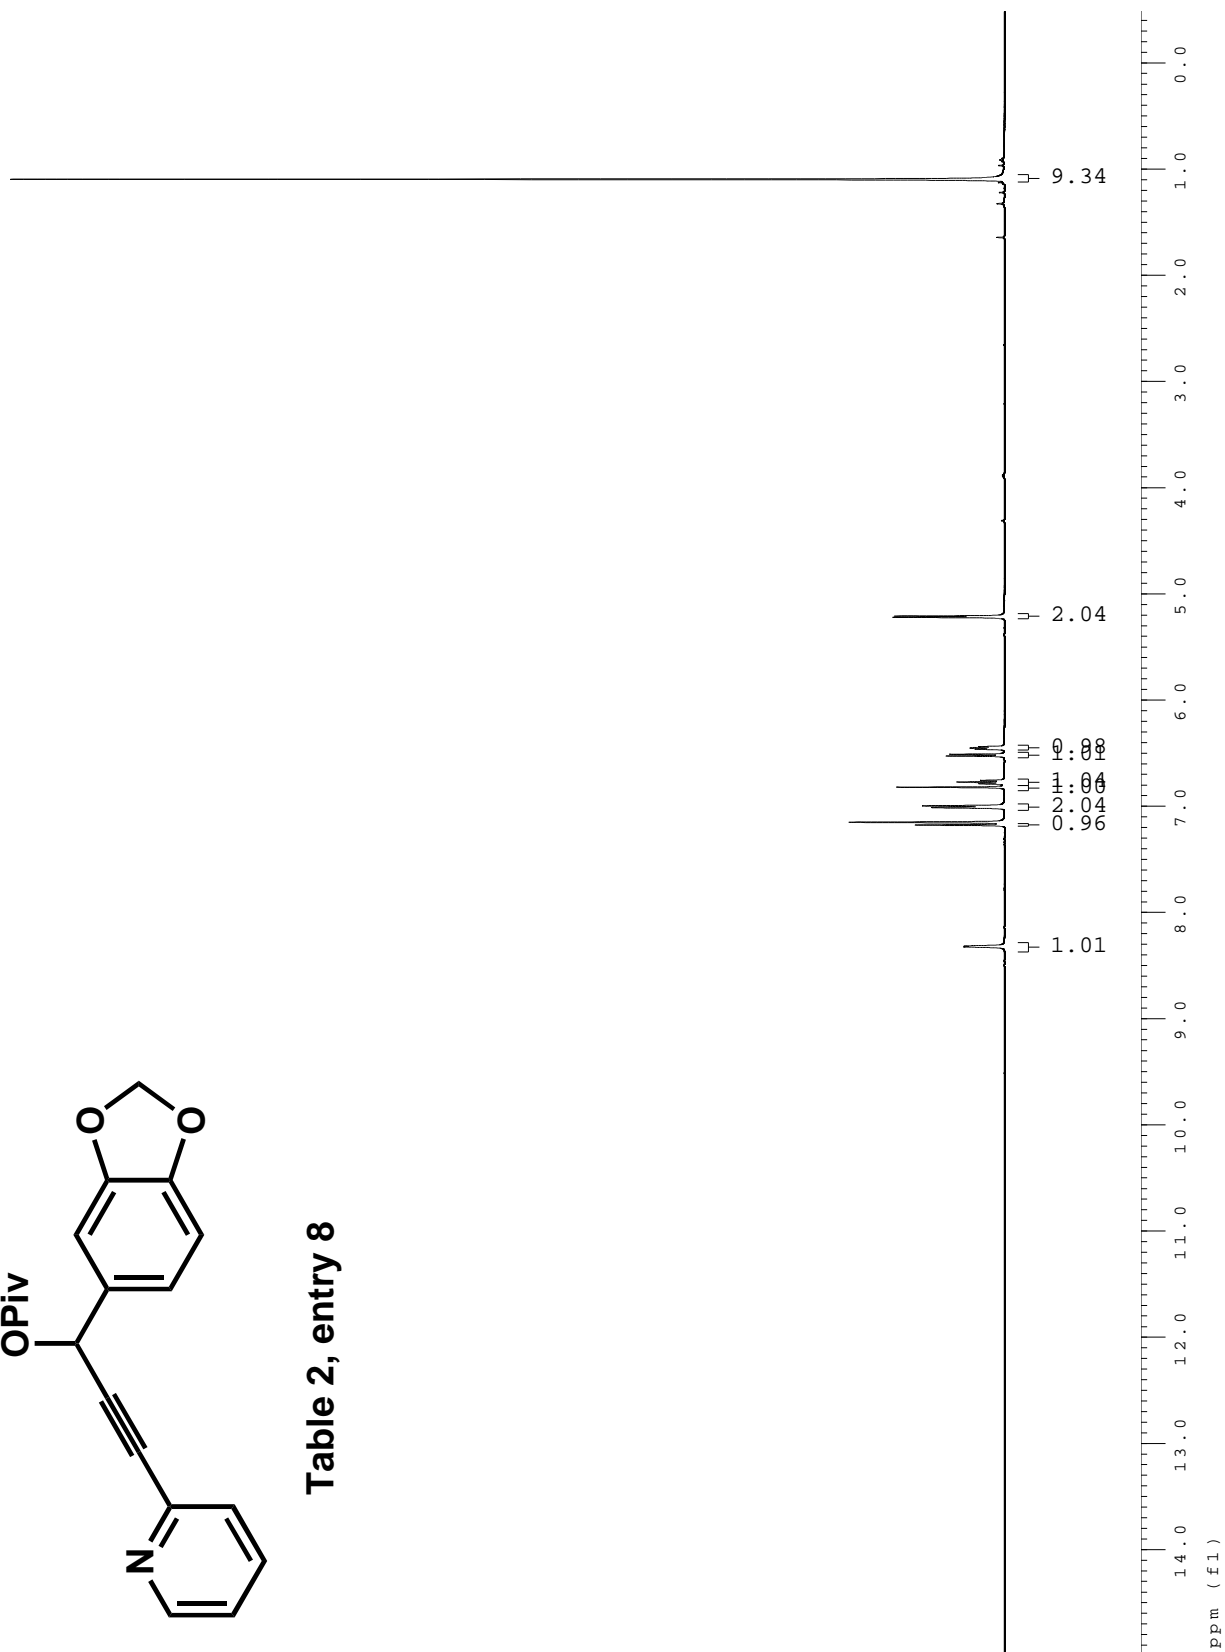

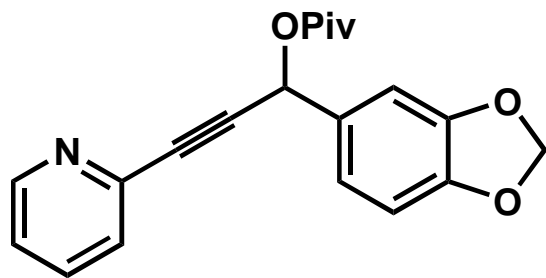

Table 2, entry 8

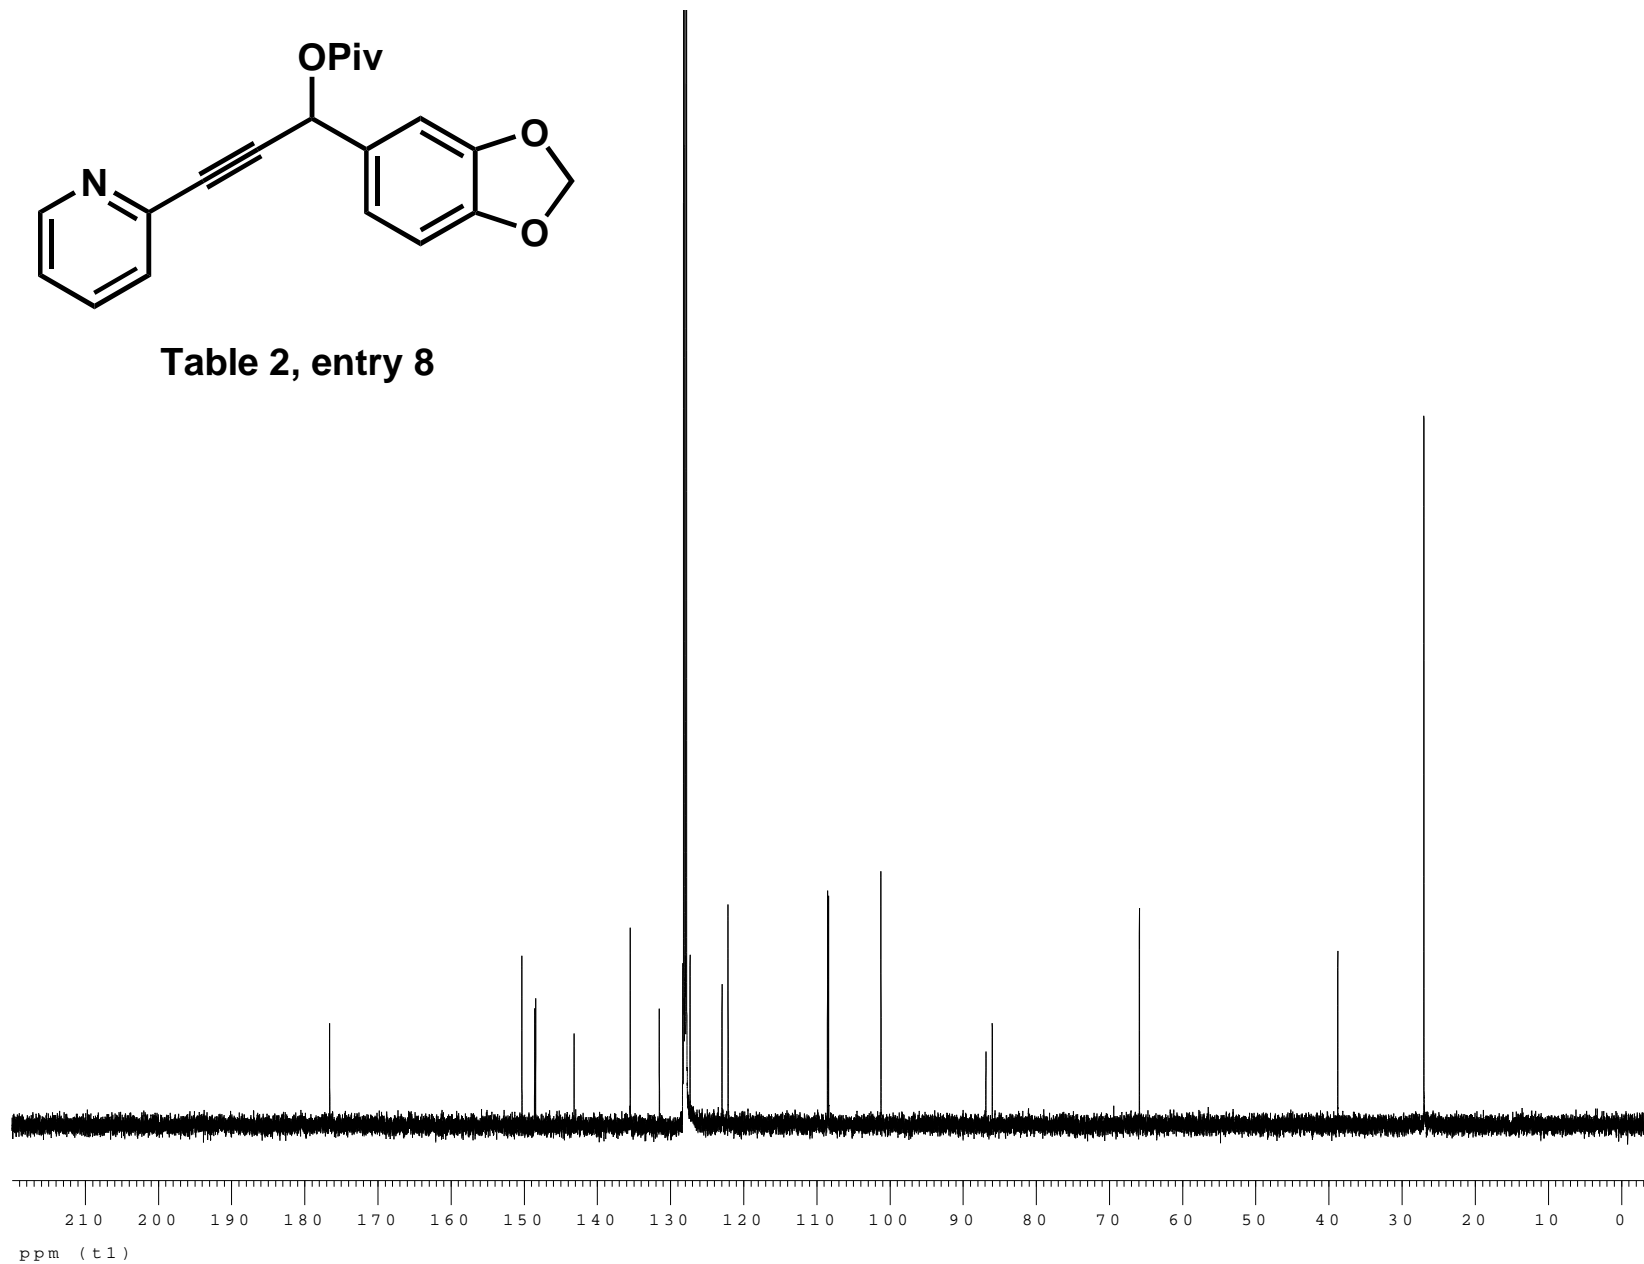

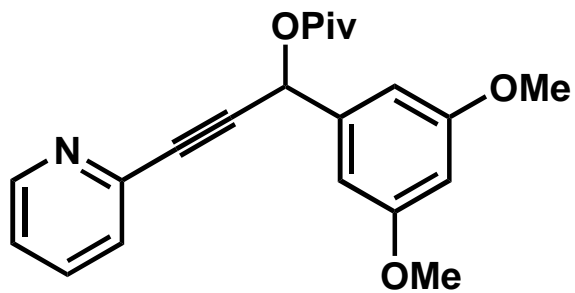

Table 2, entry 9

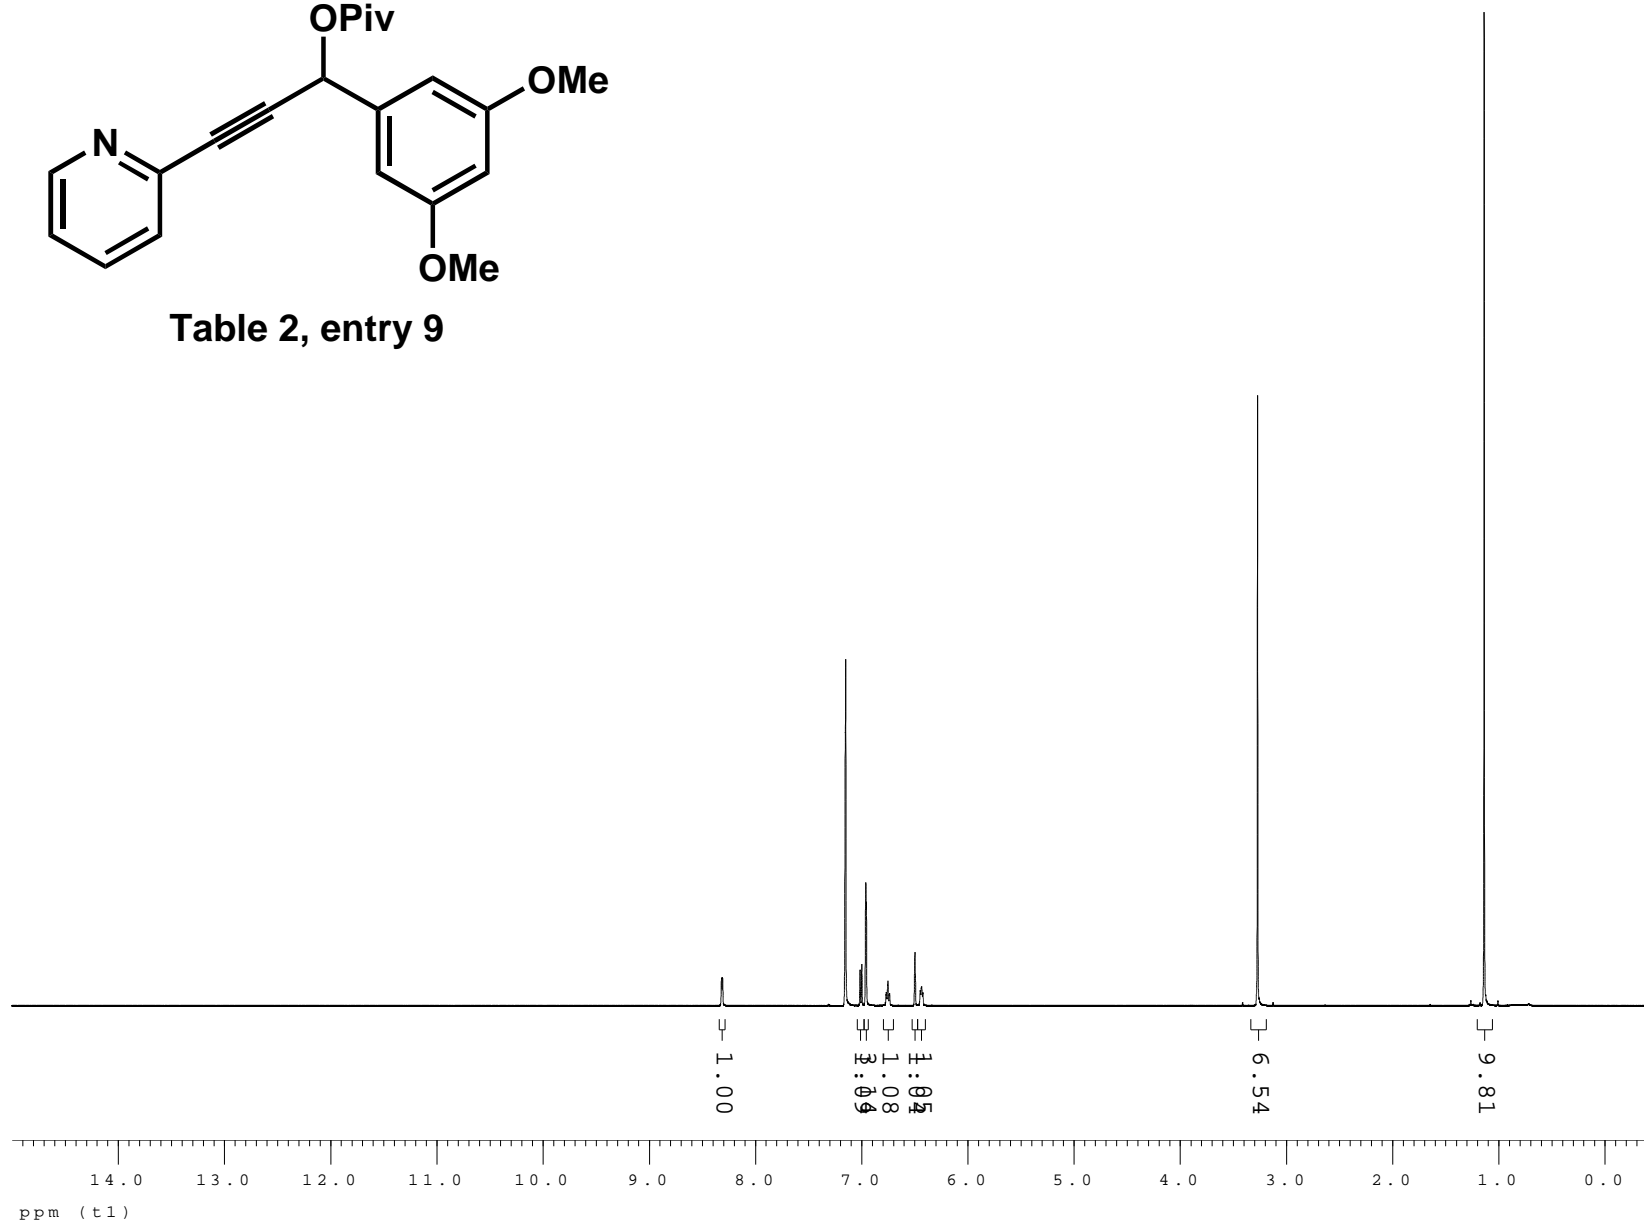

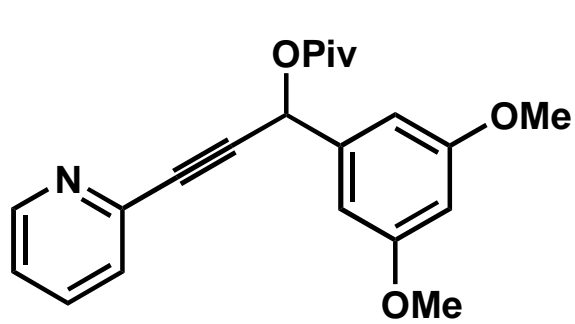

Table 2, entry 9

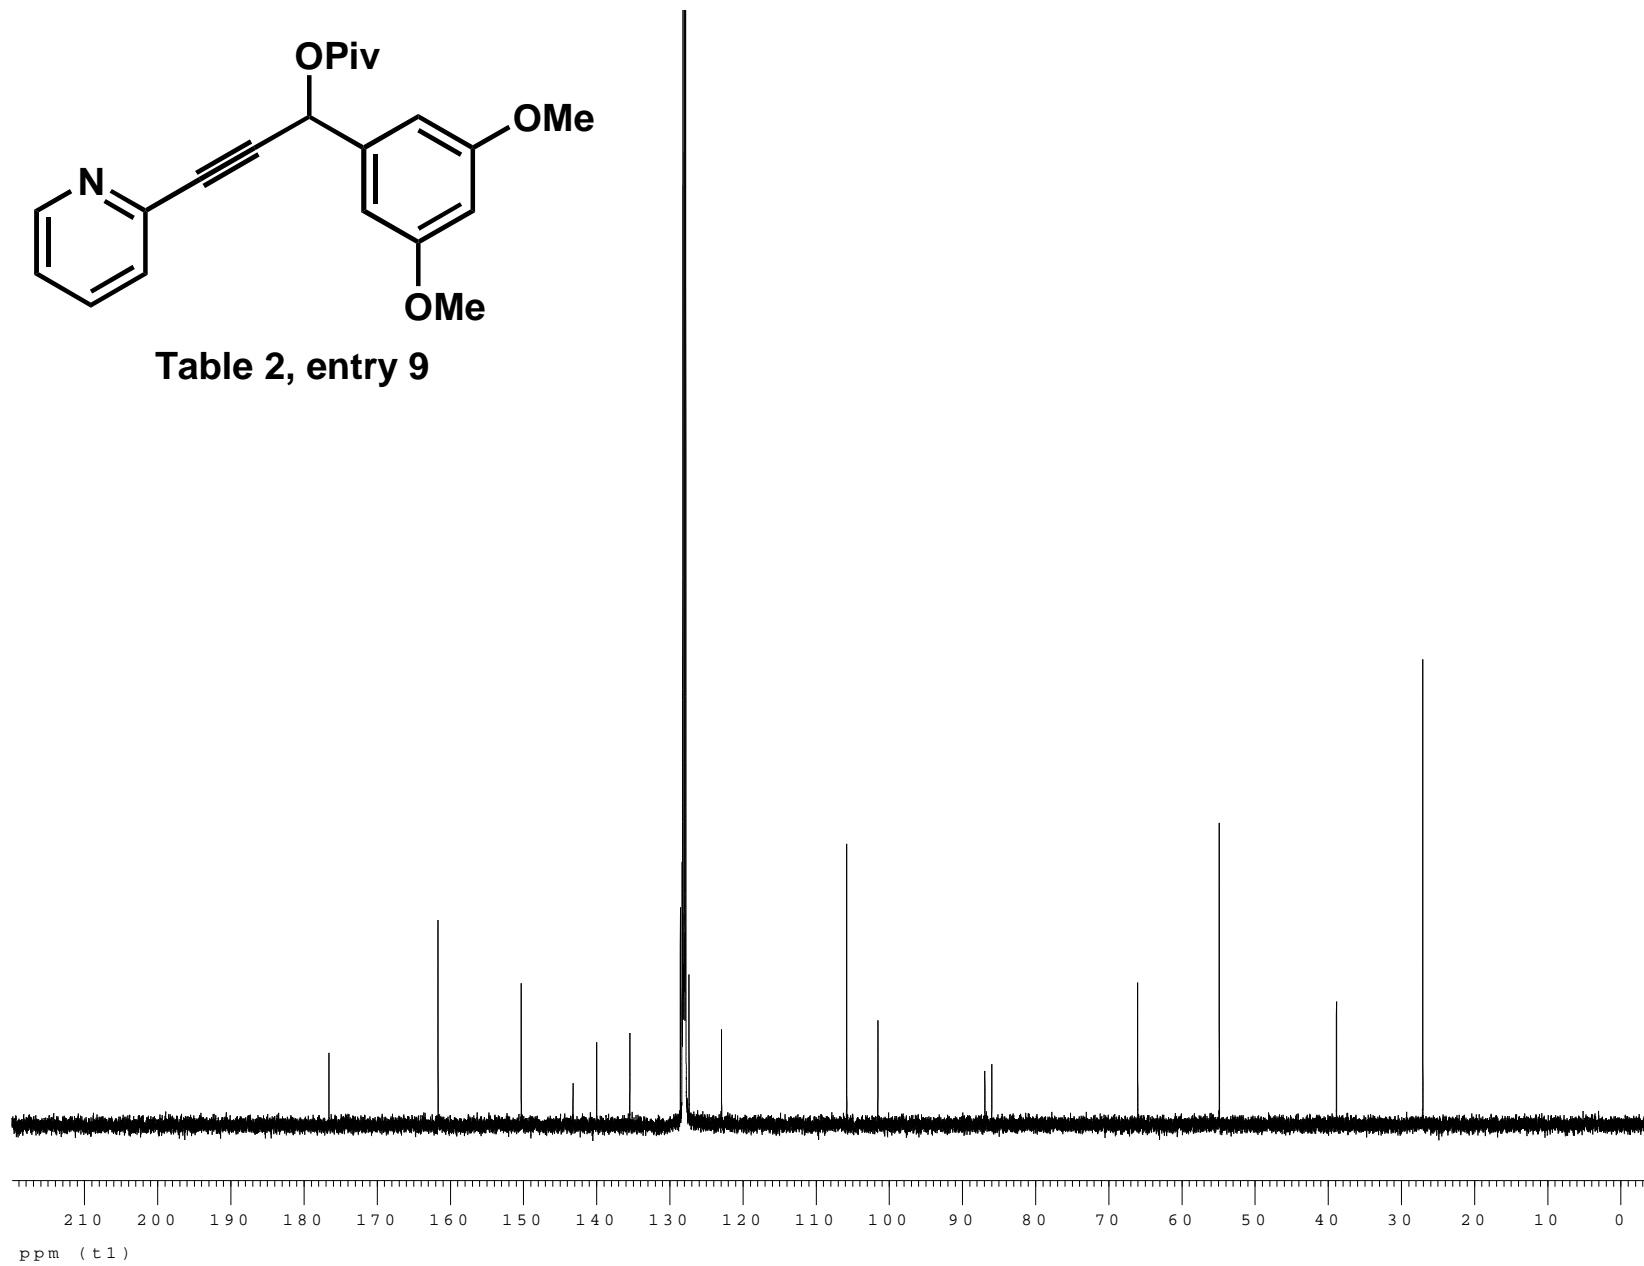



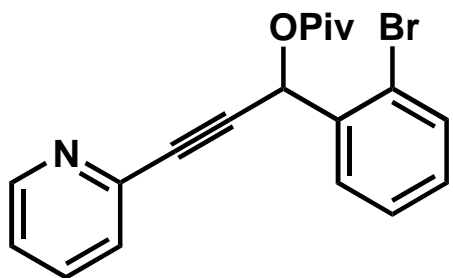

Table 2, entry 10

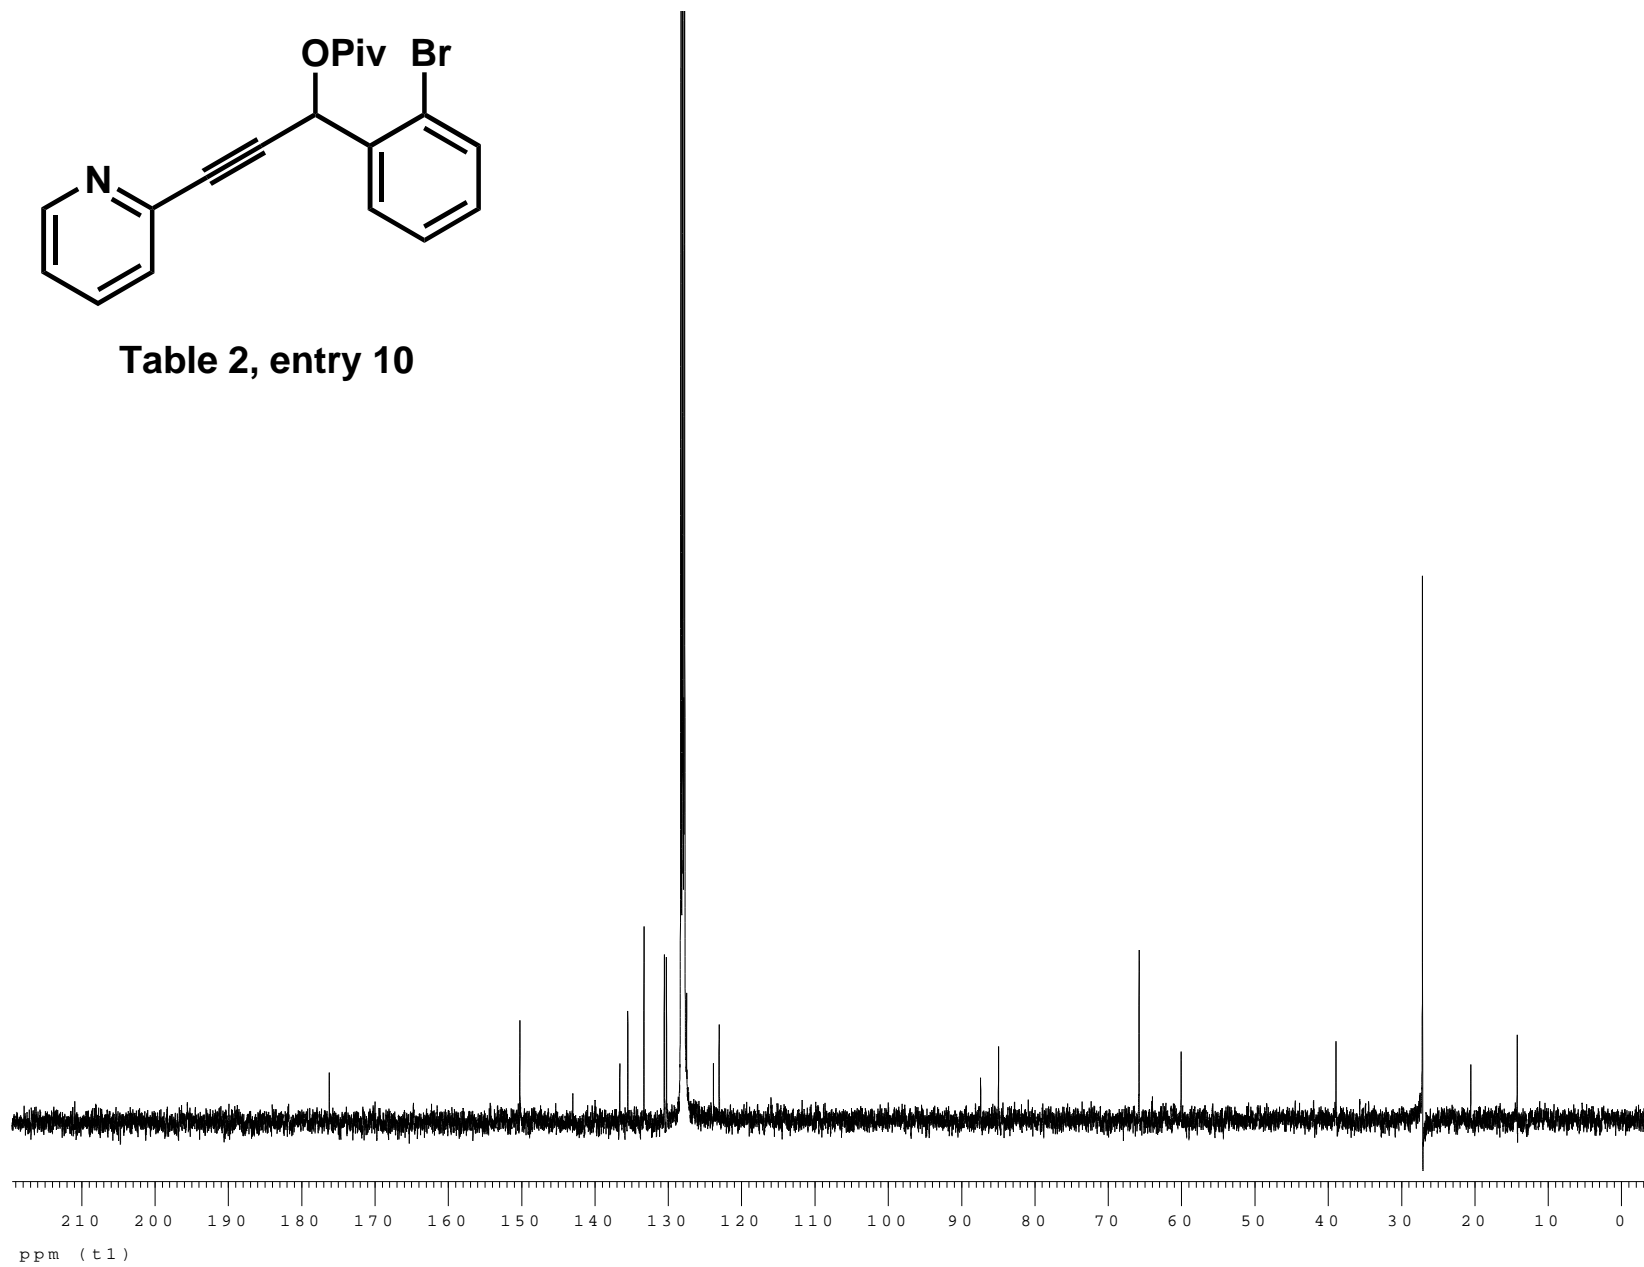

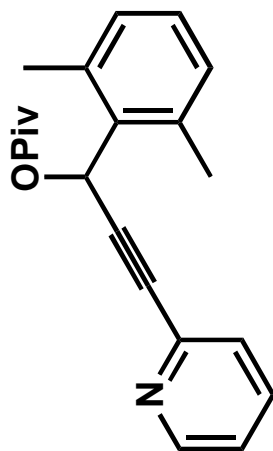

Table 2, entry 11

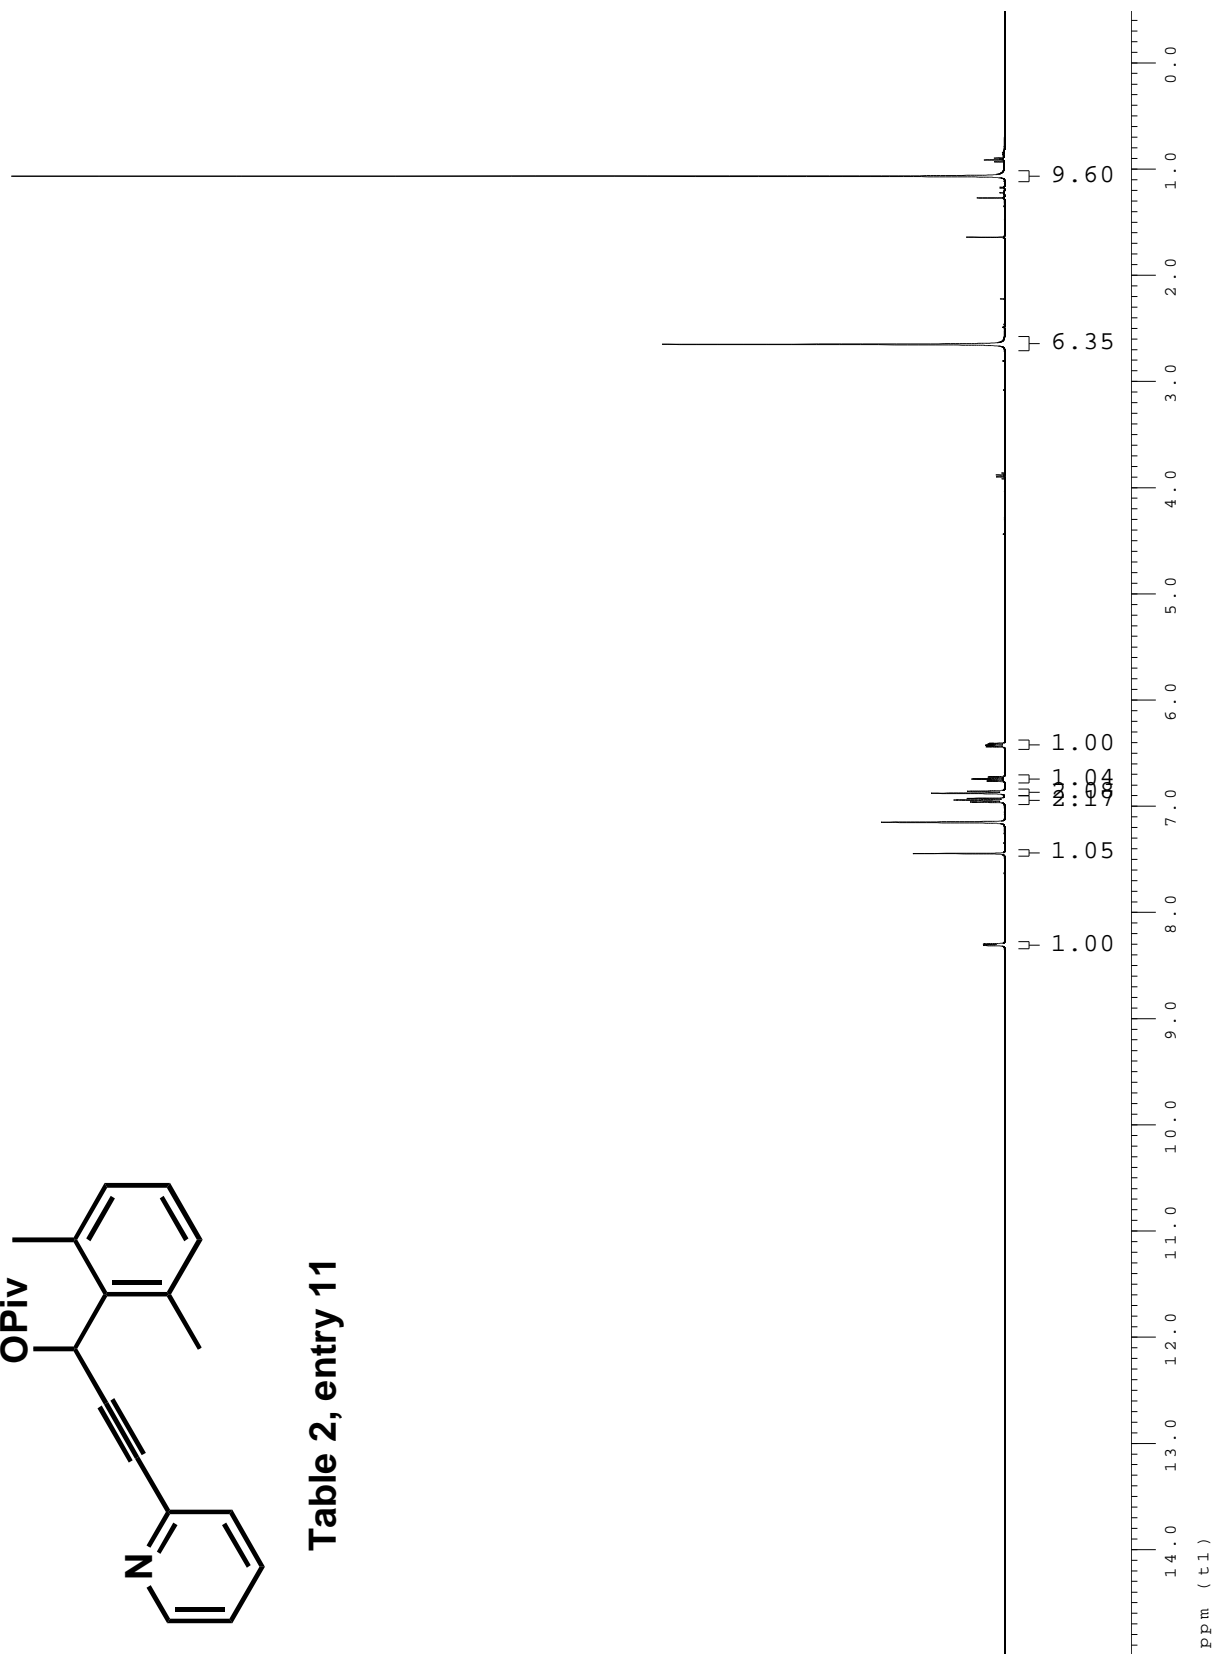



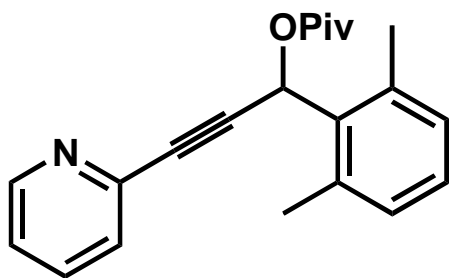

Table 2, entry 11

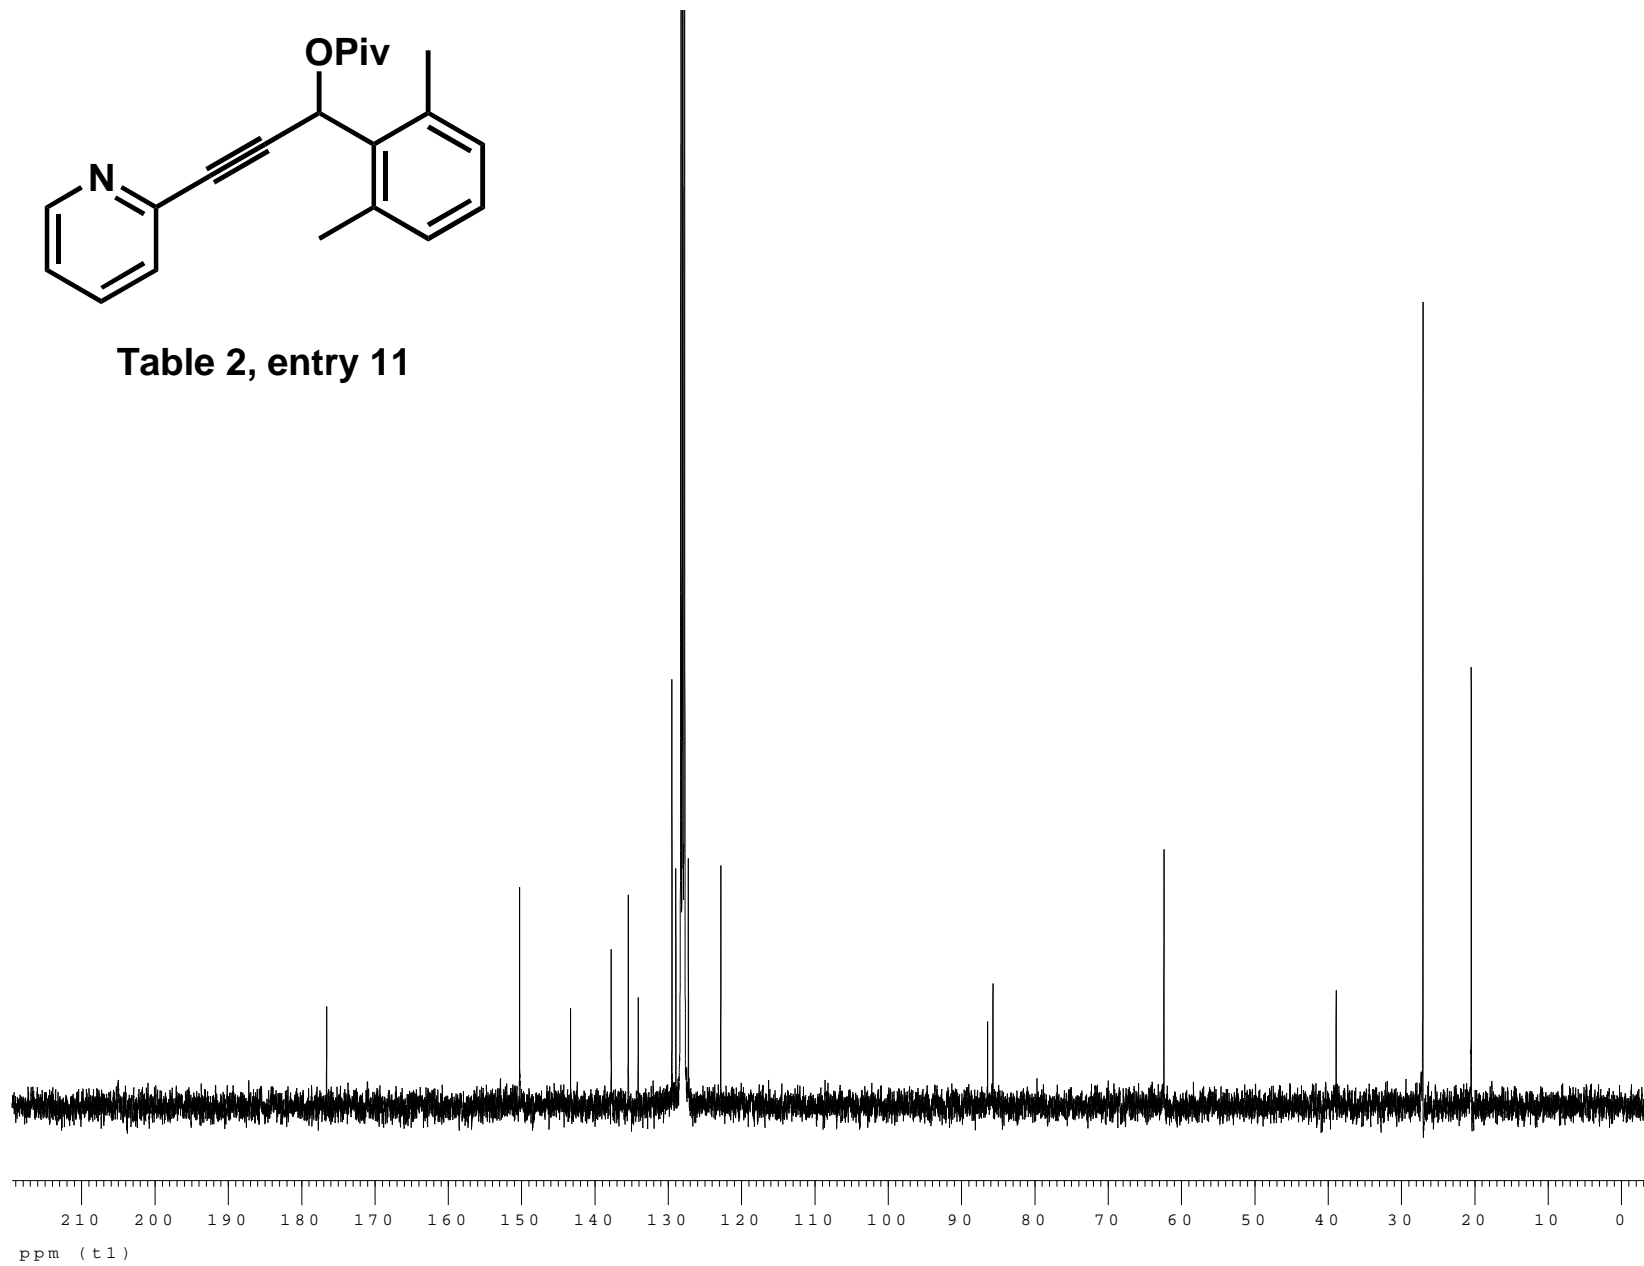

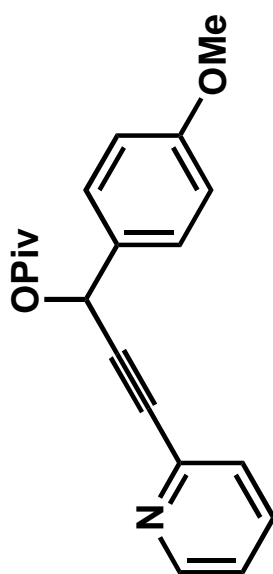

Table 2, entry 12b

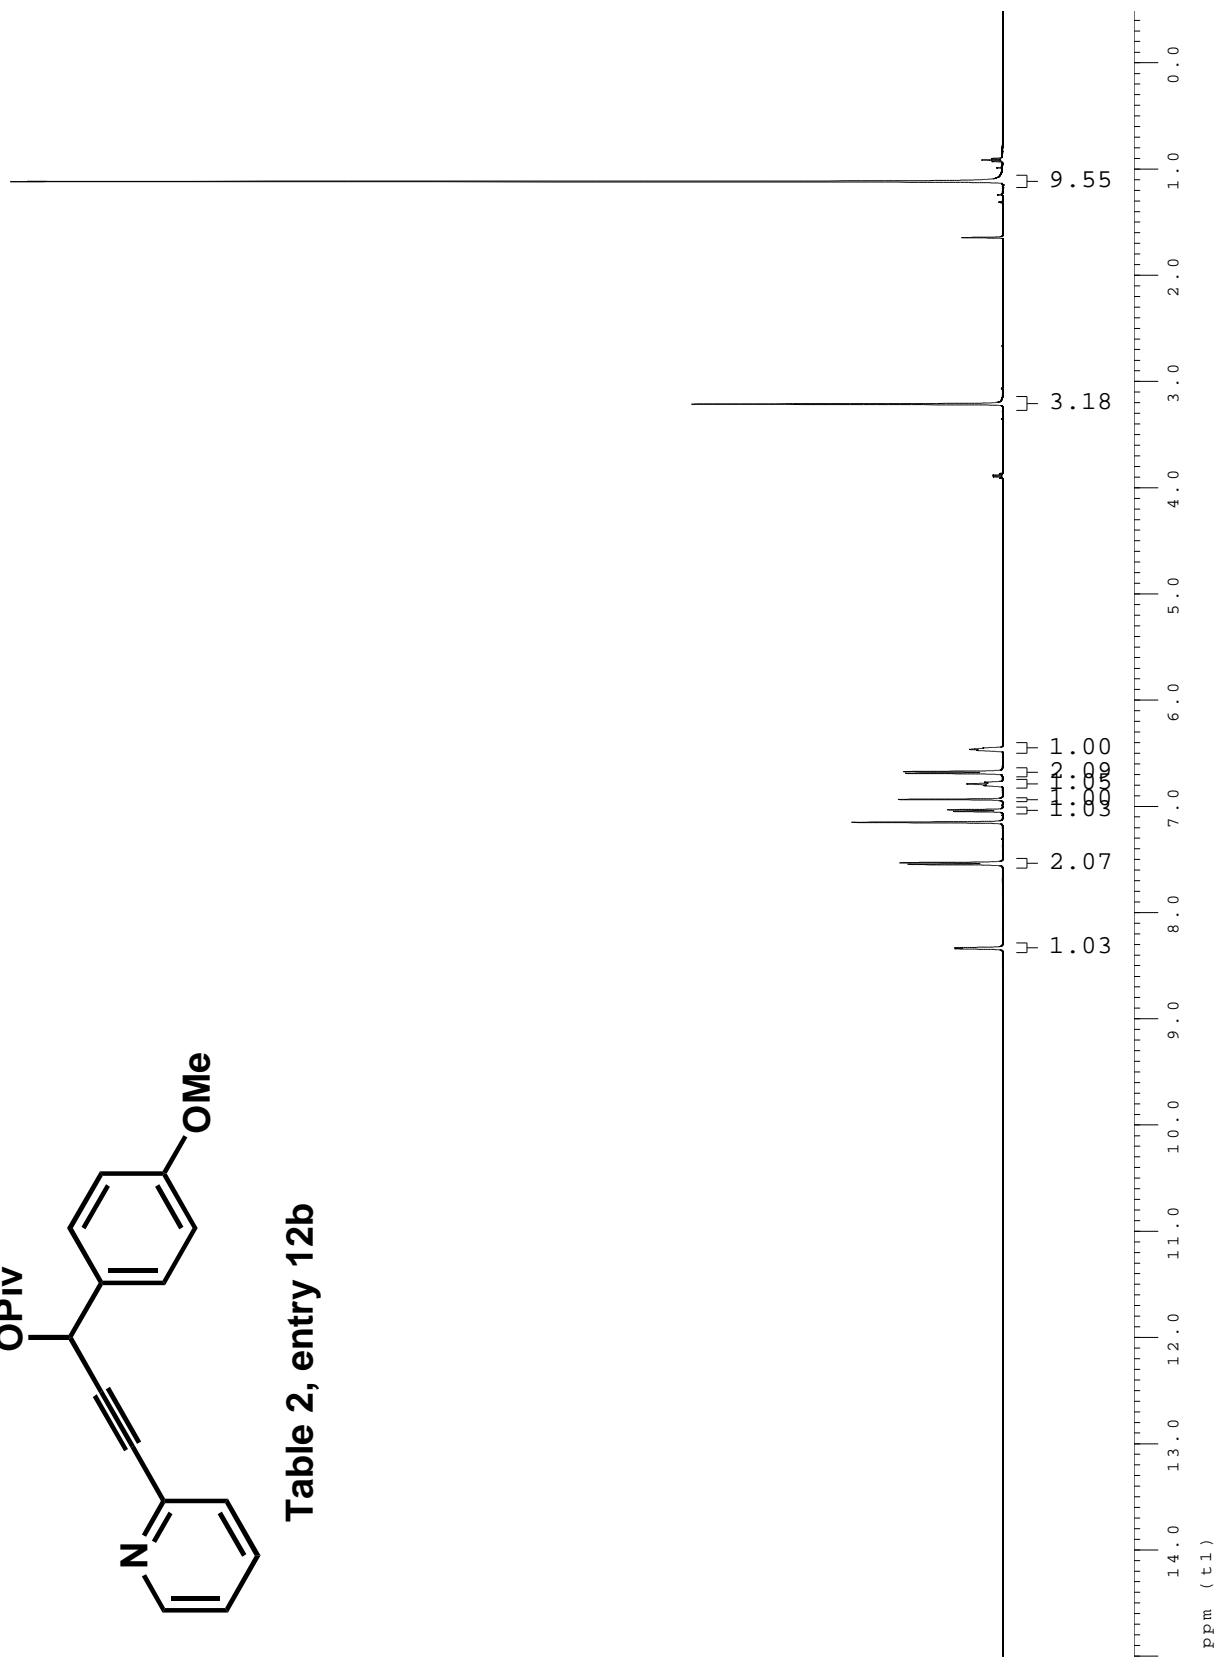

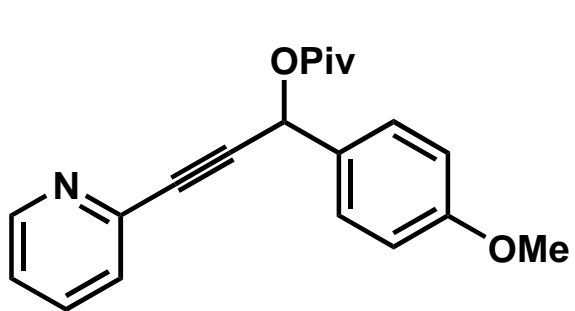

Table 2, entry 12b

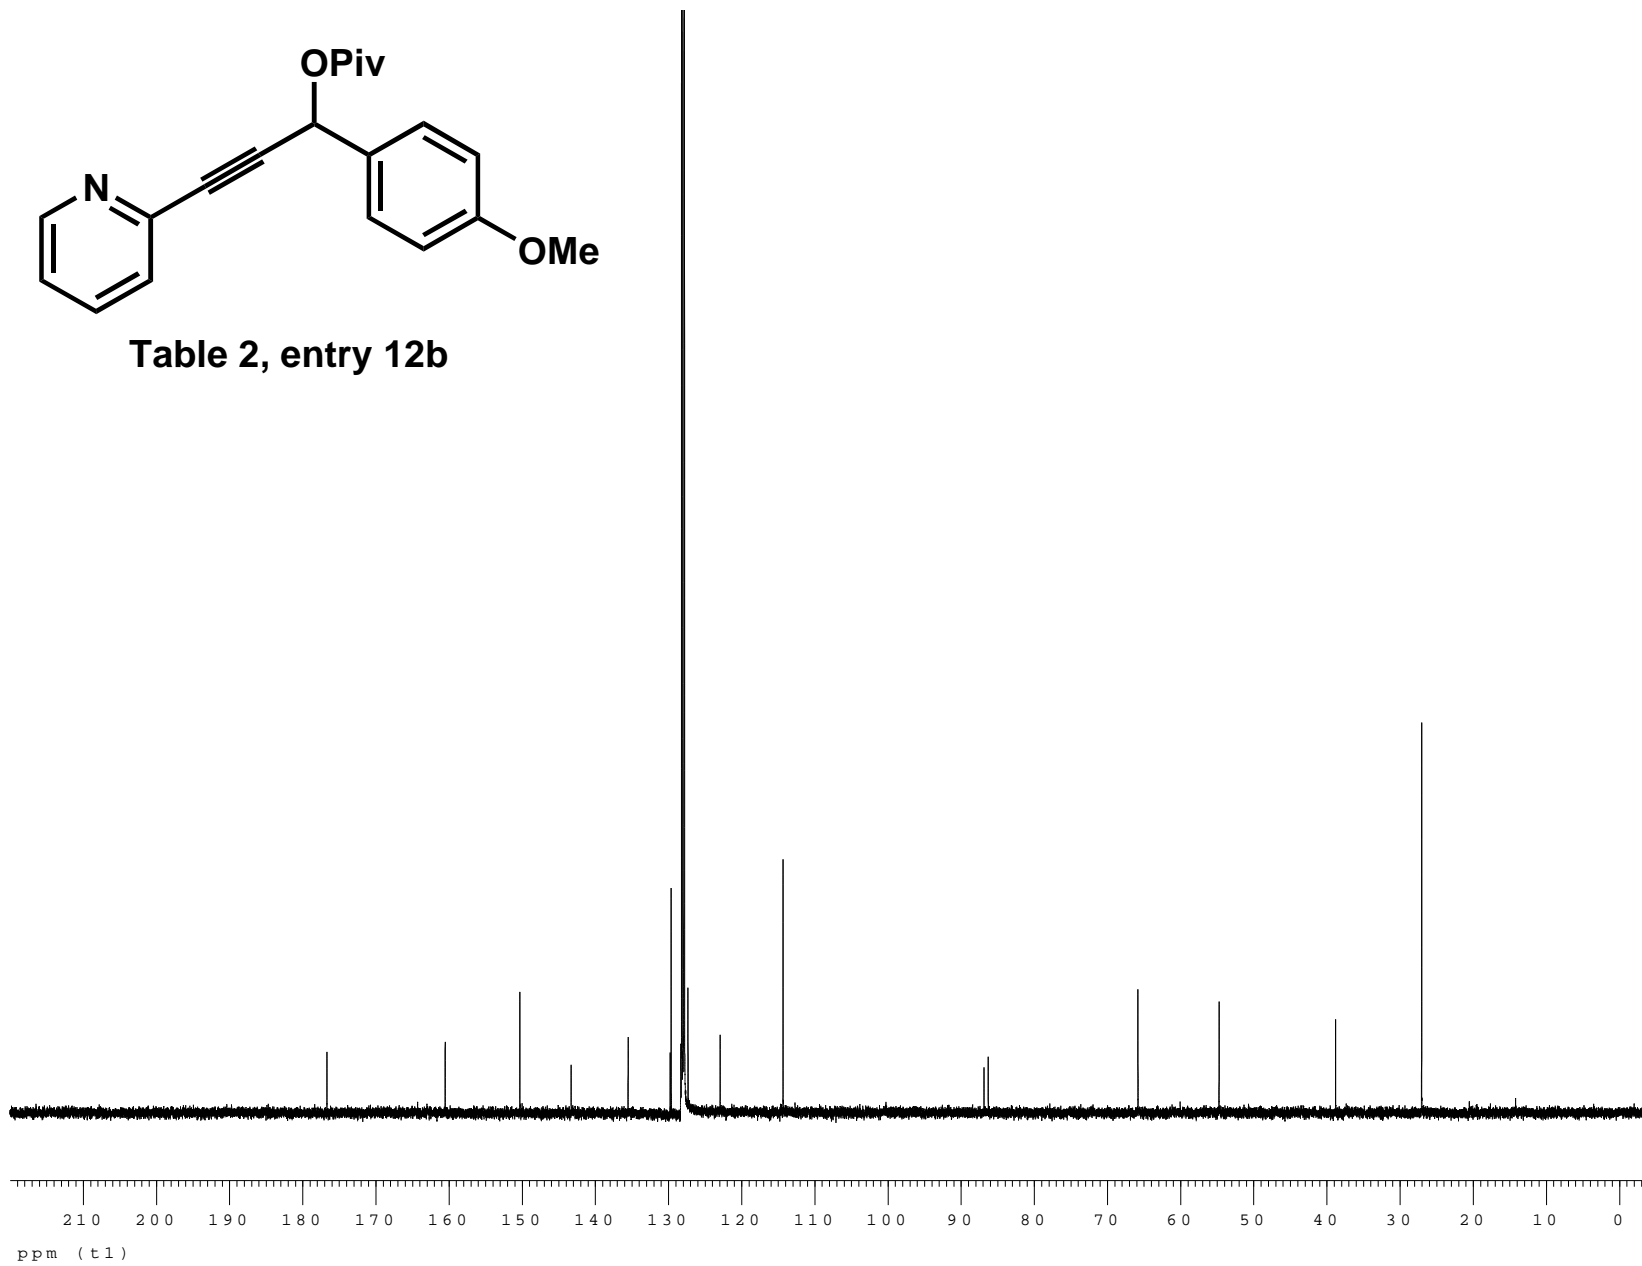

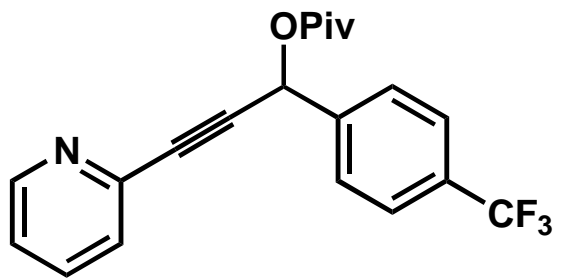

Table 2, entry 12c

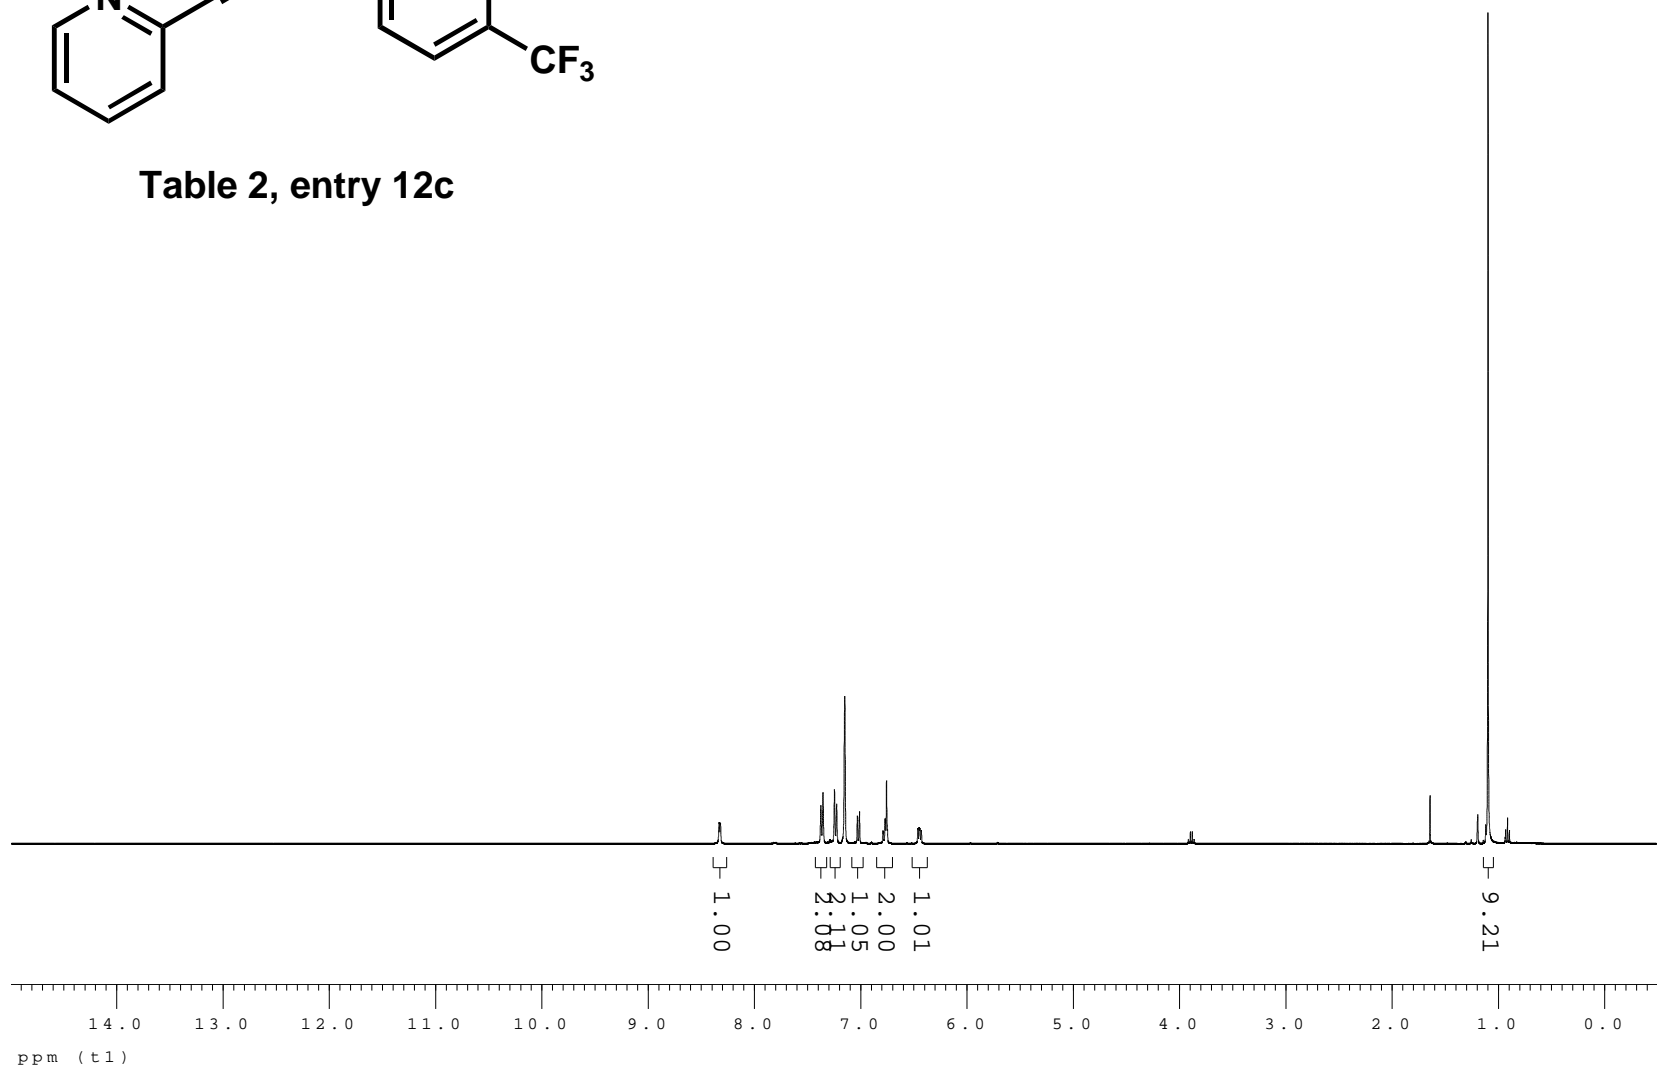

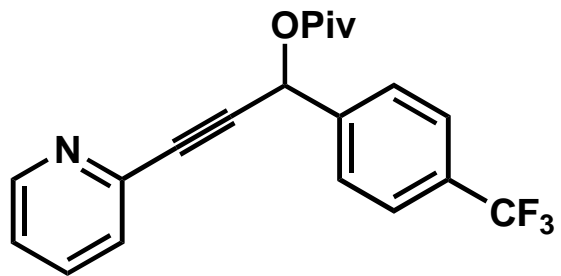

Table 2, entry 12c

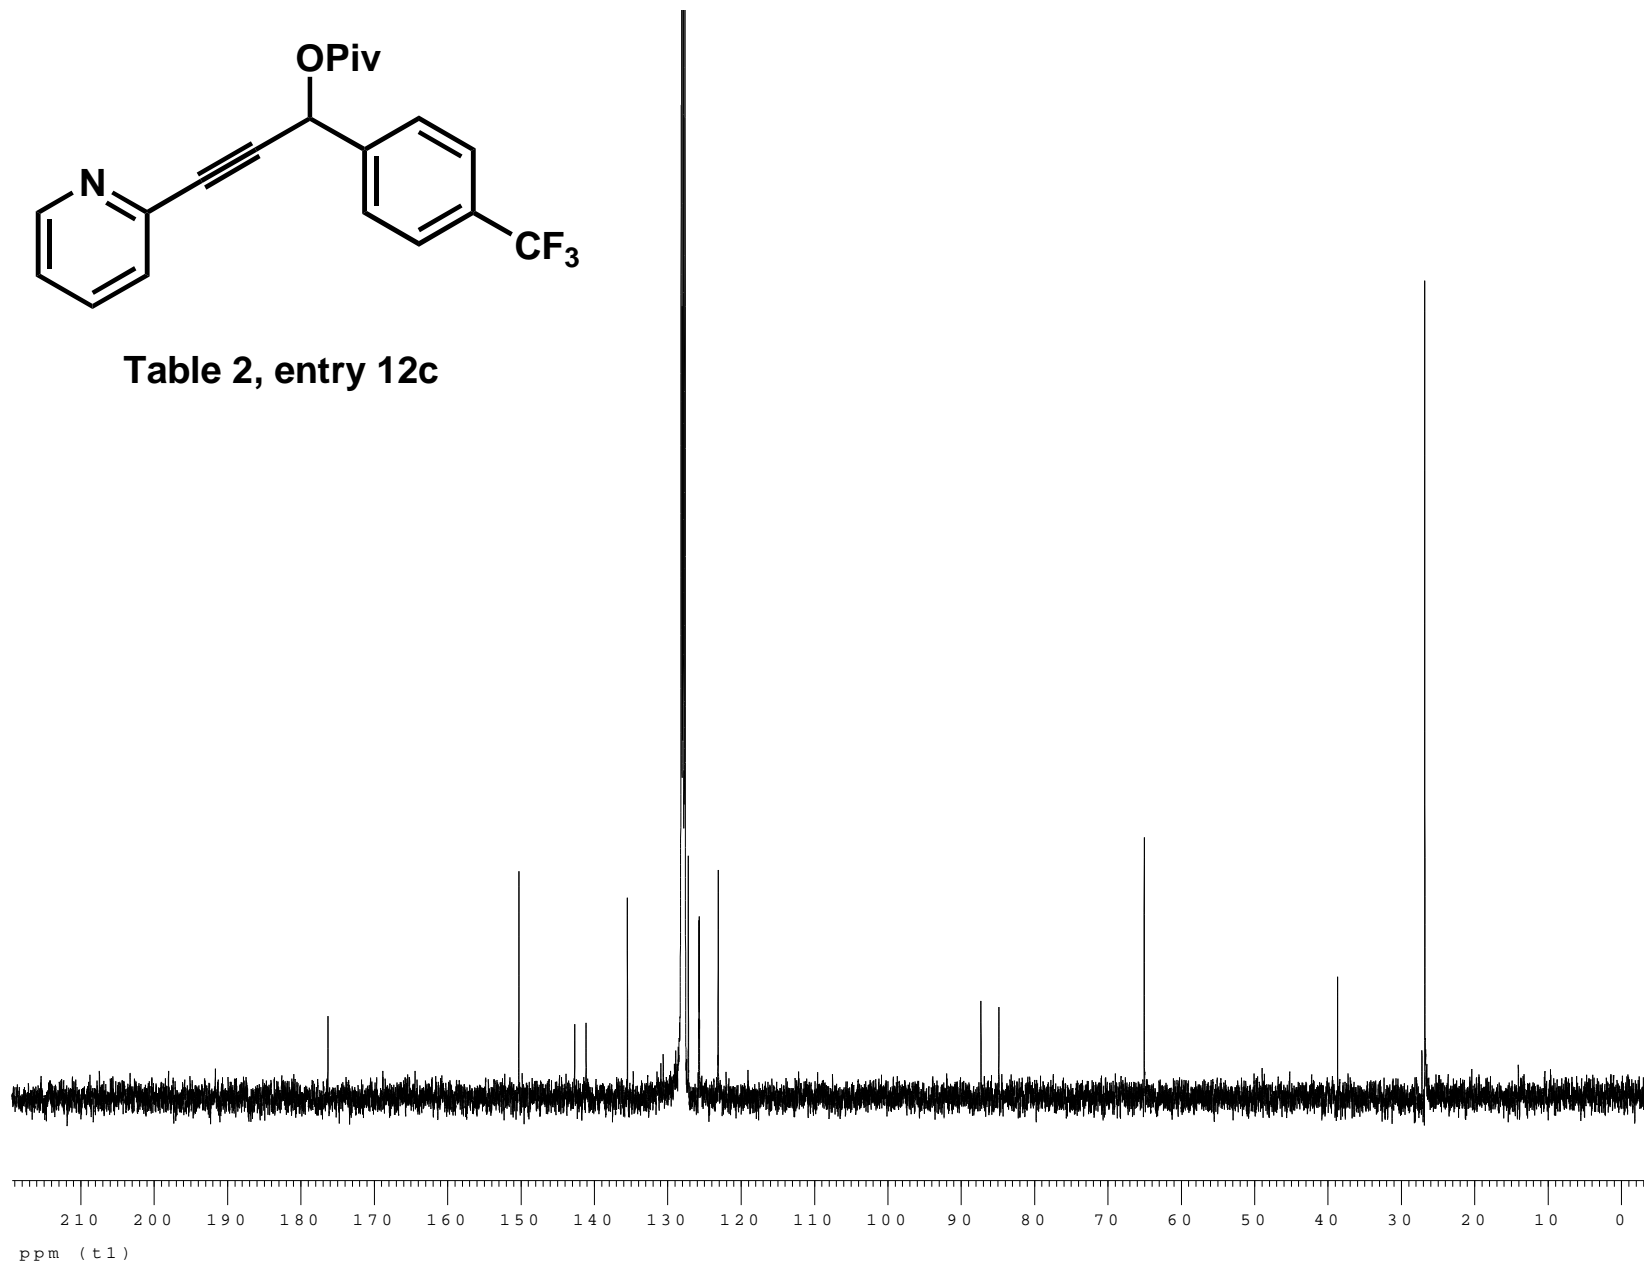

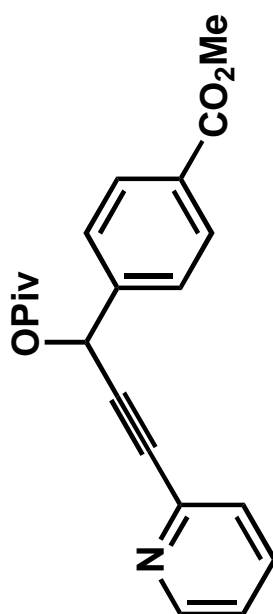

Table 2, entry 12d

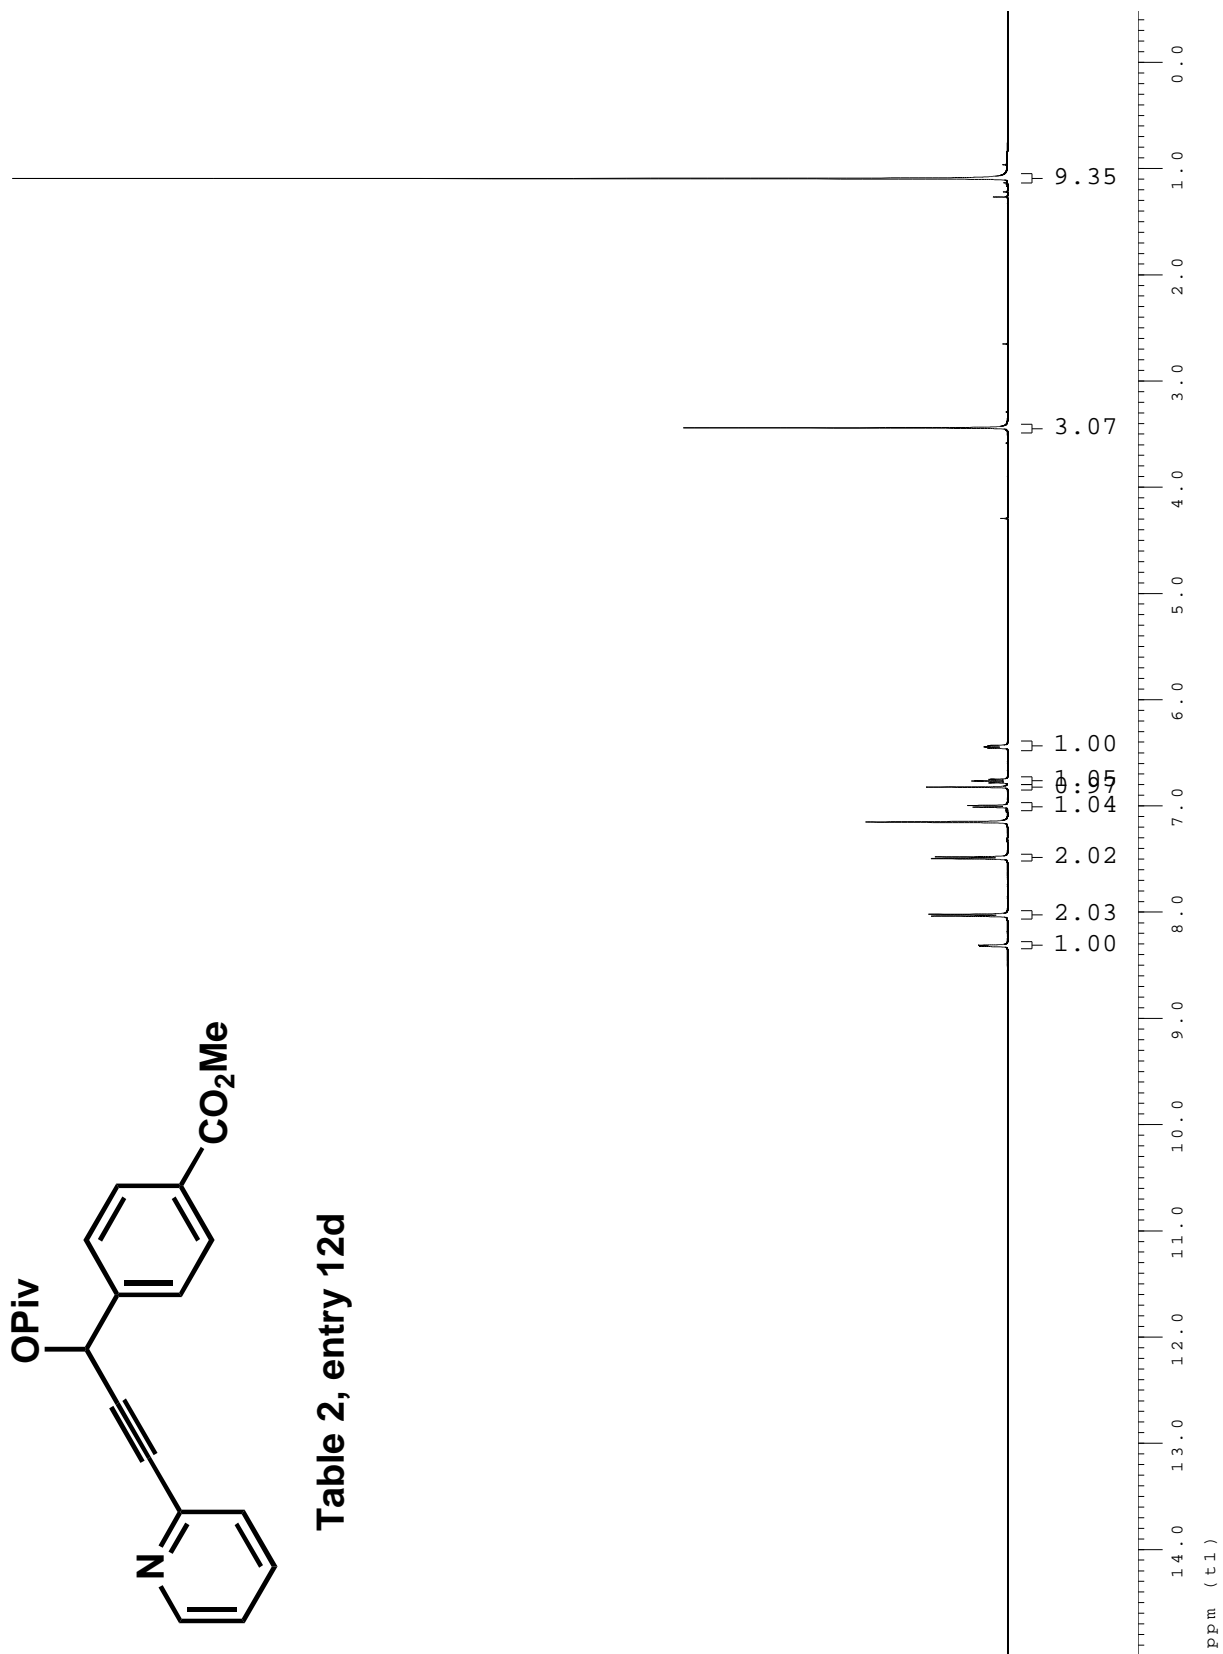

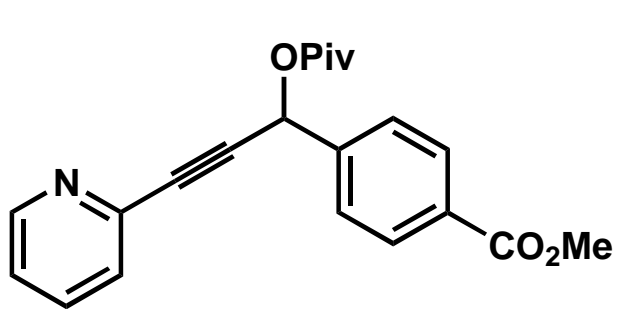

Table 2, entry 12d

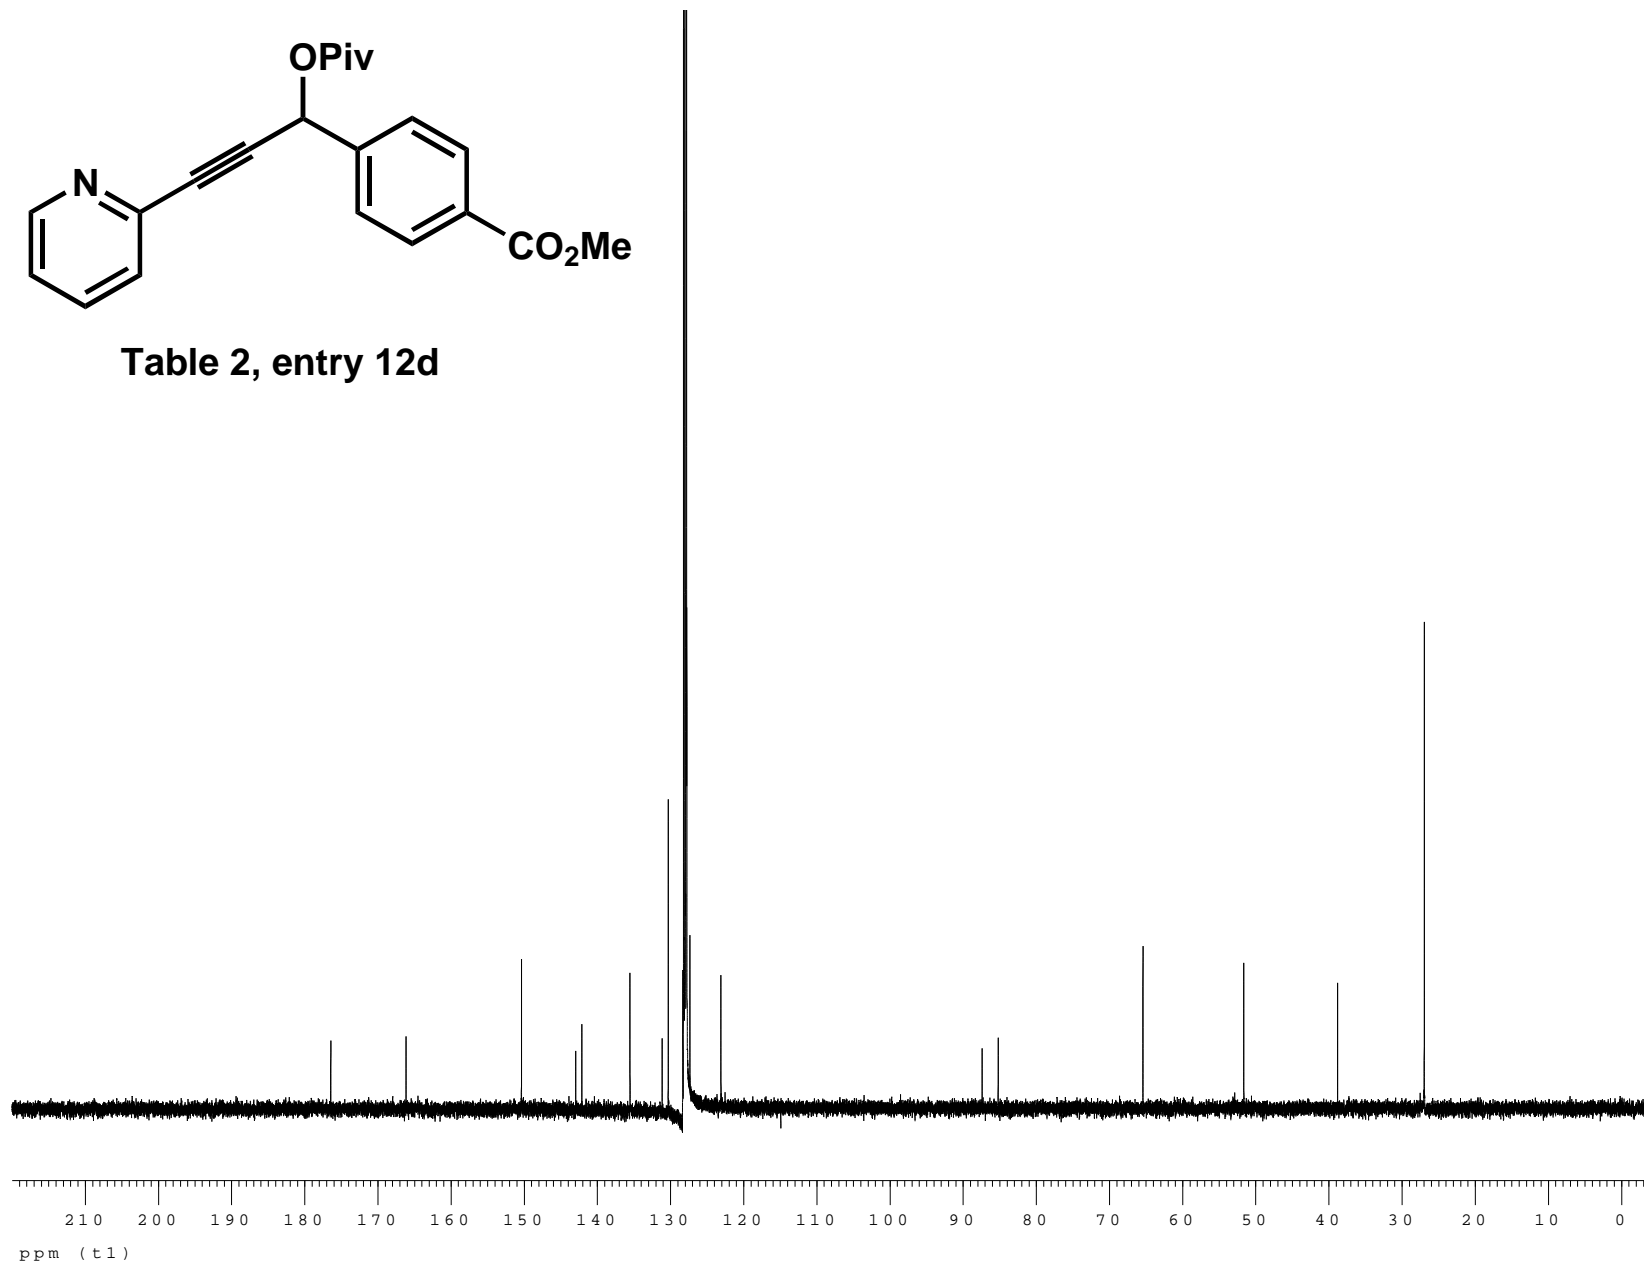

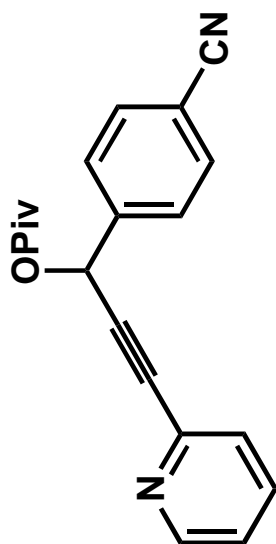

Table 2, entry 12e

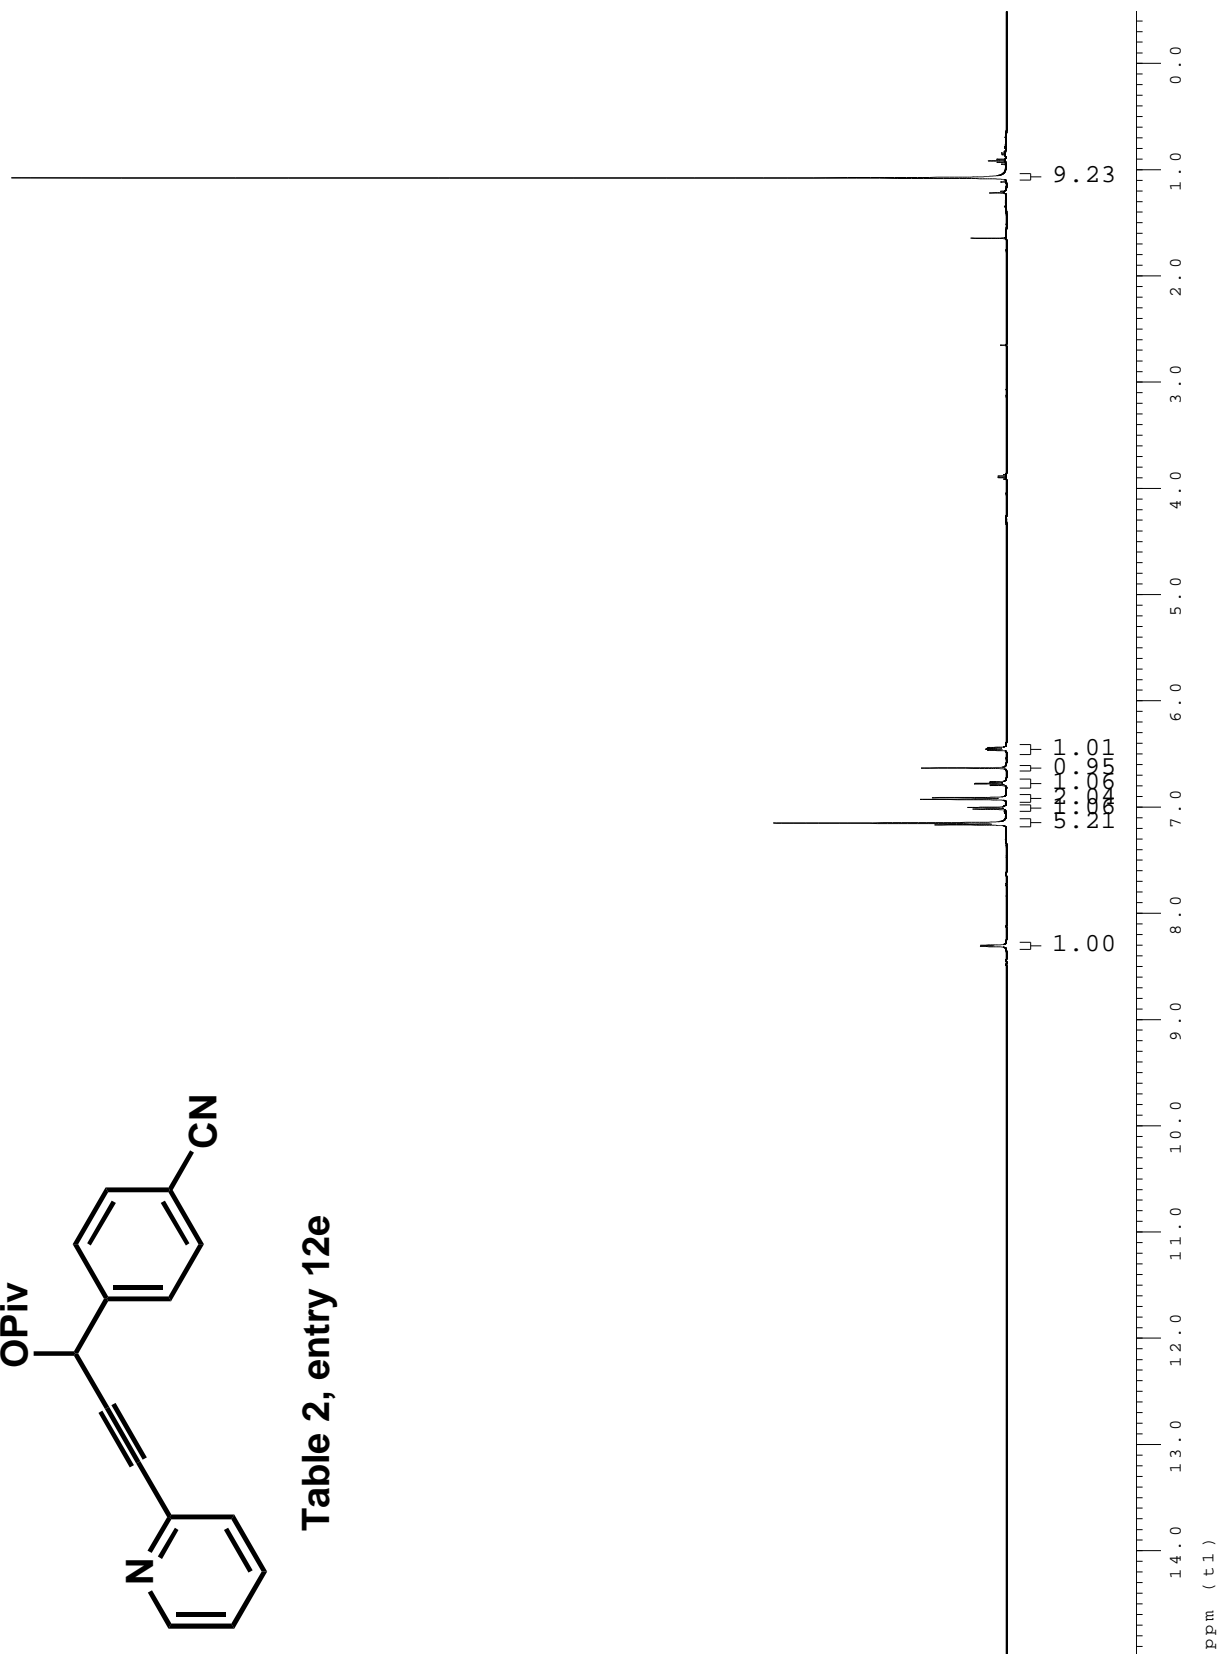



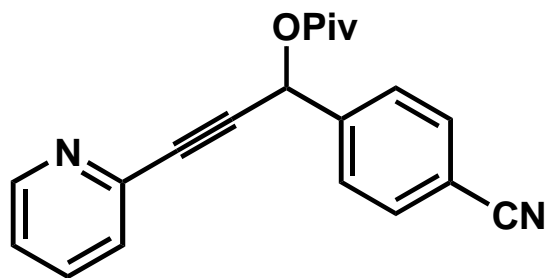

Table 2, entry 12e

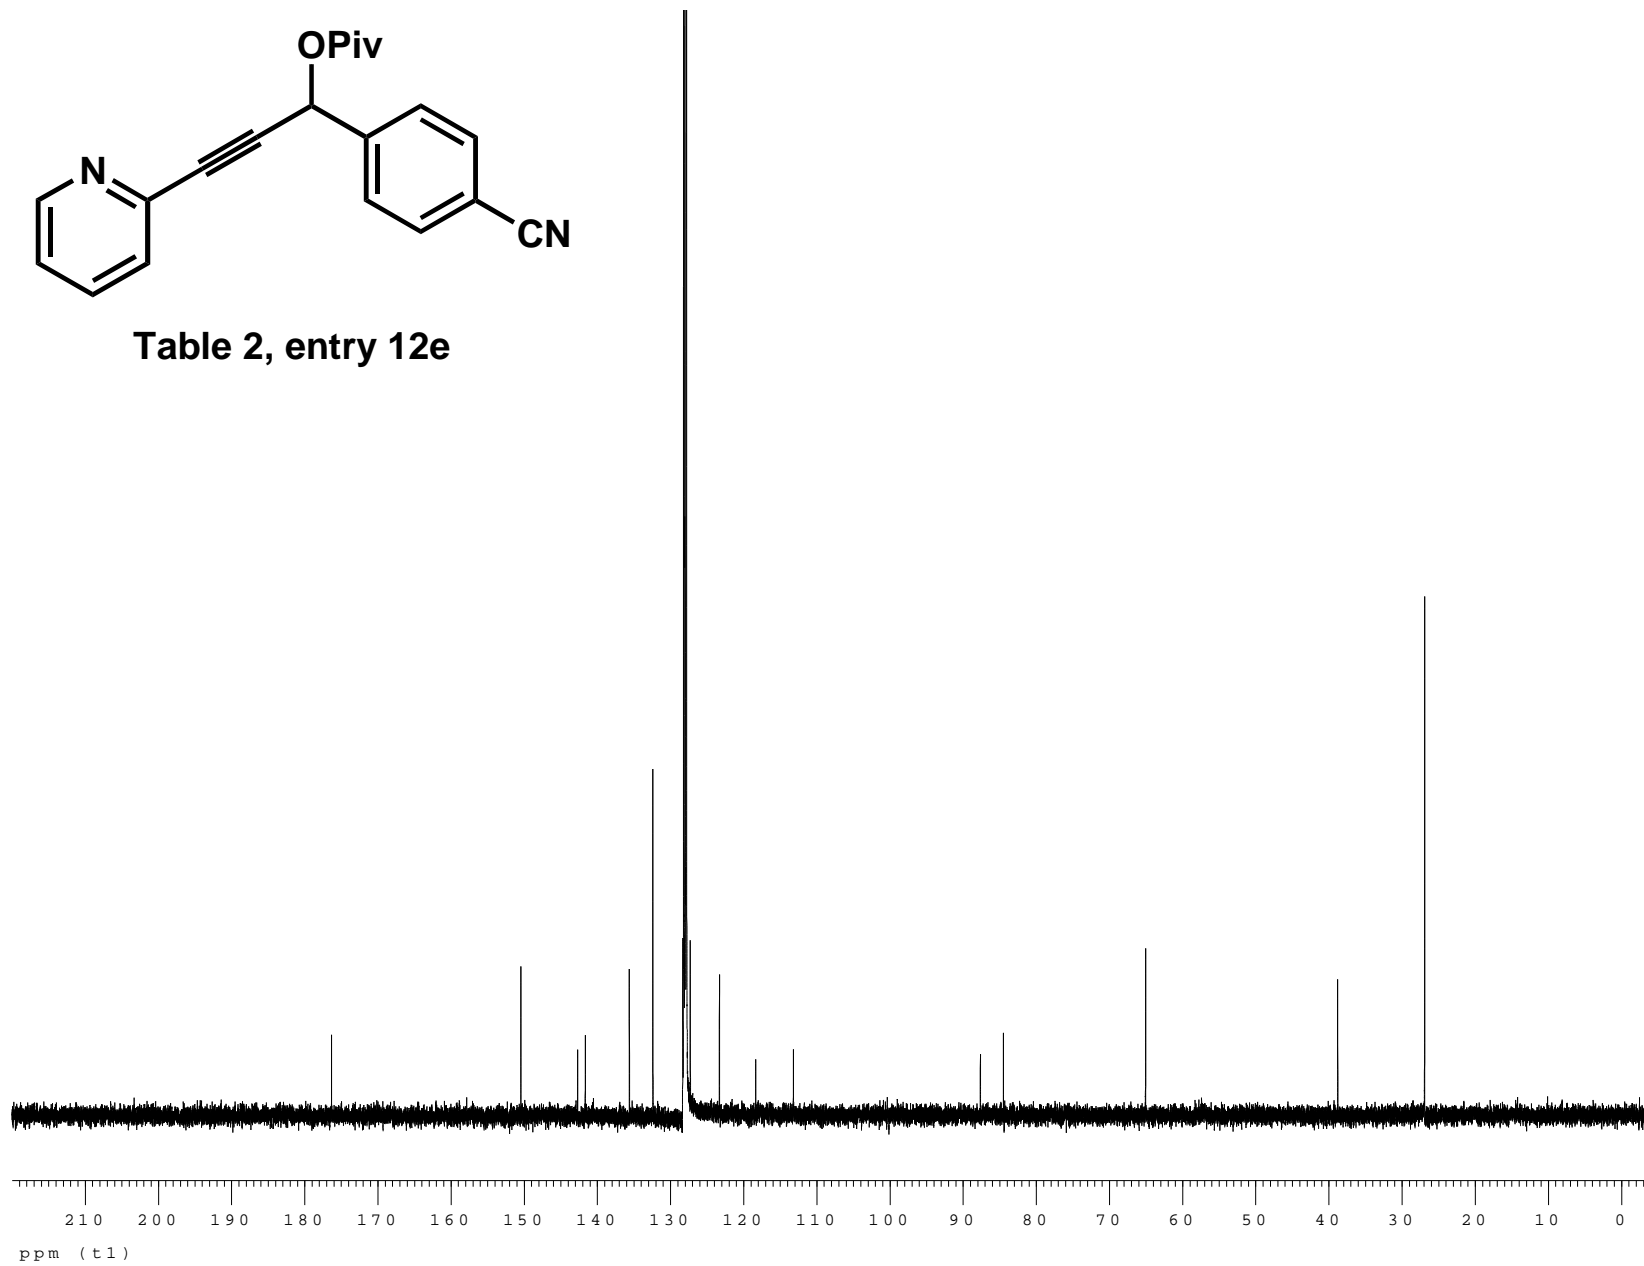

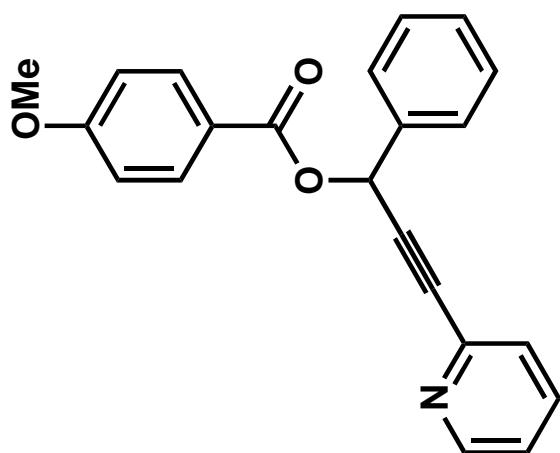

21b

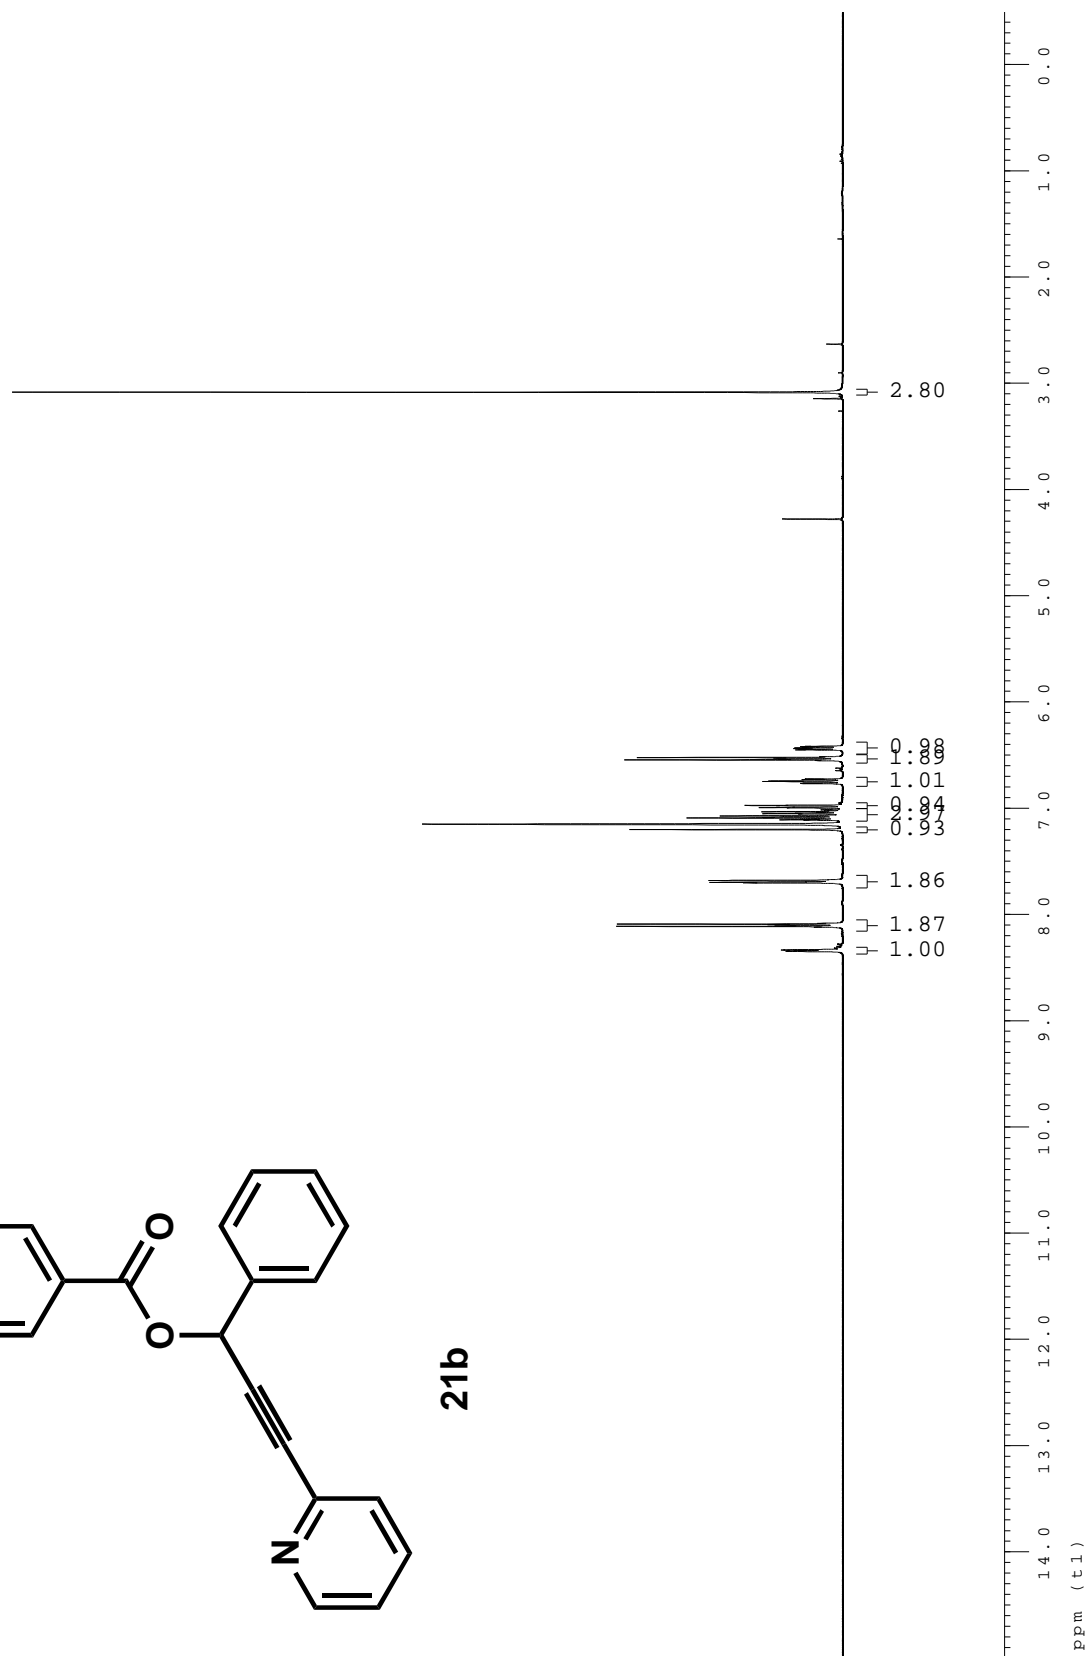

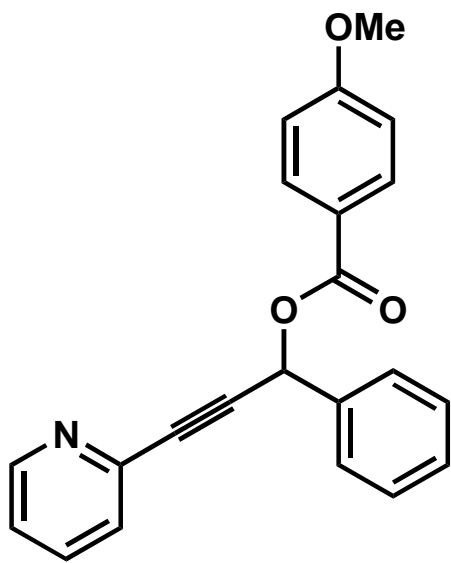

21b

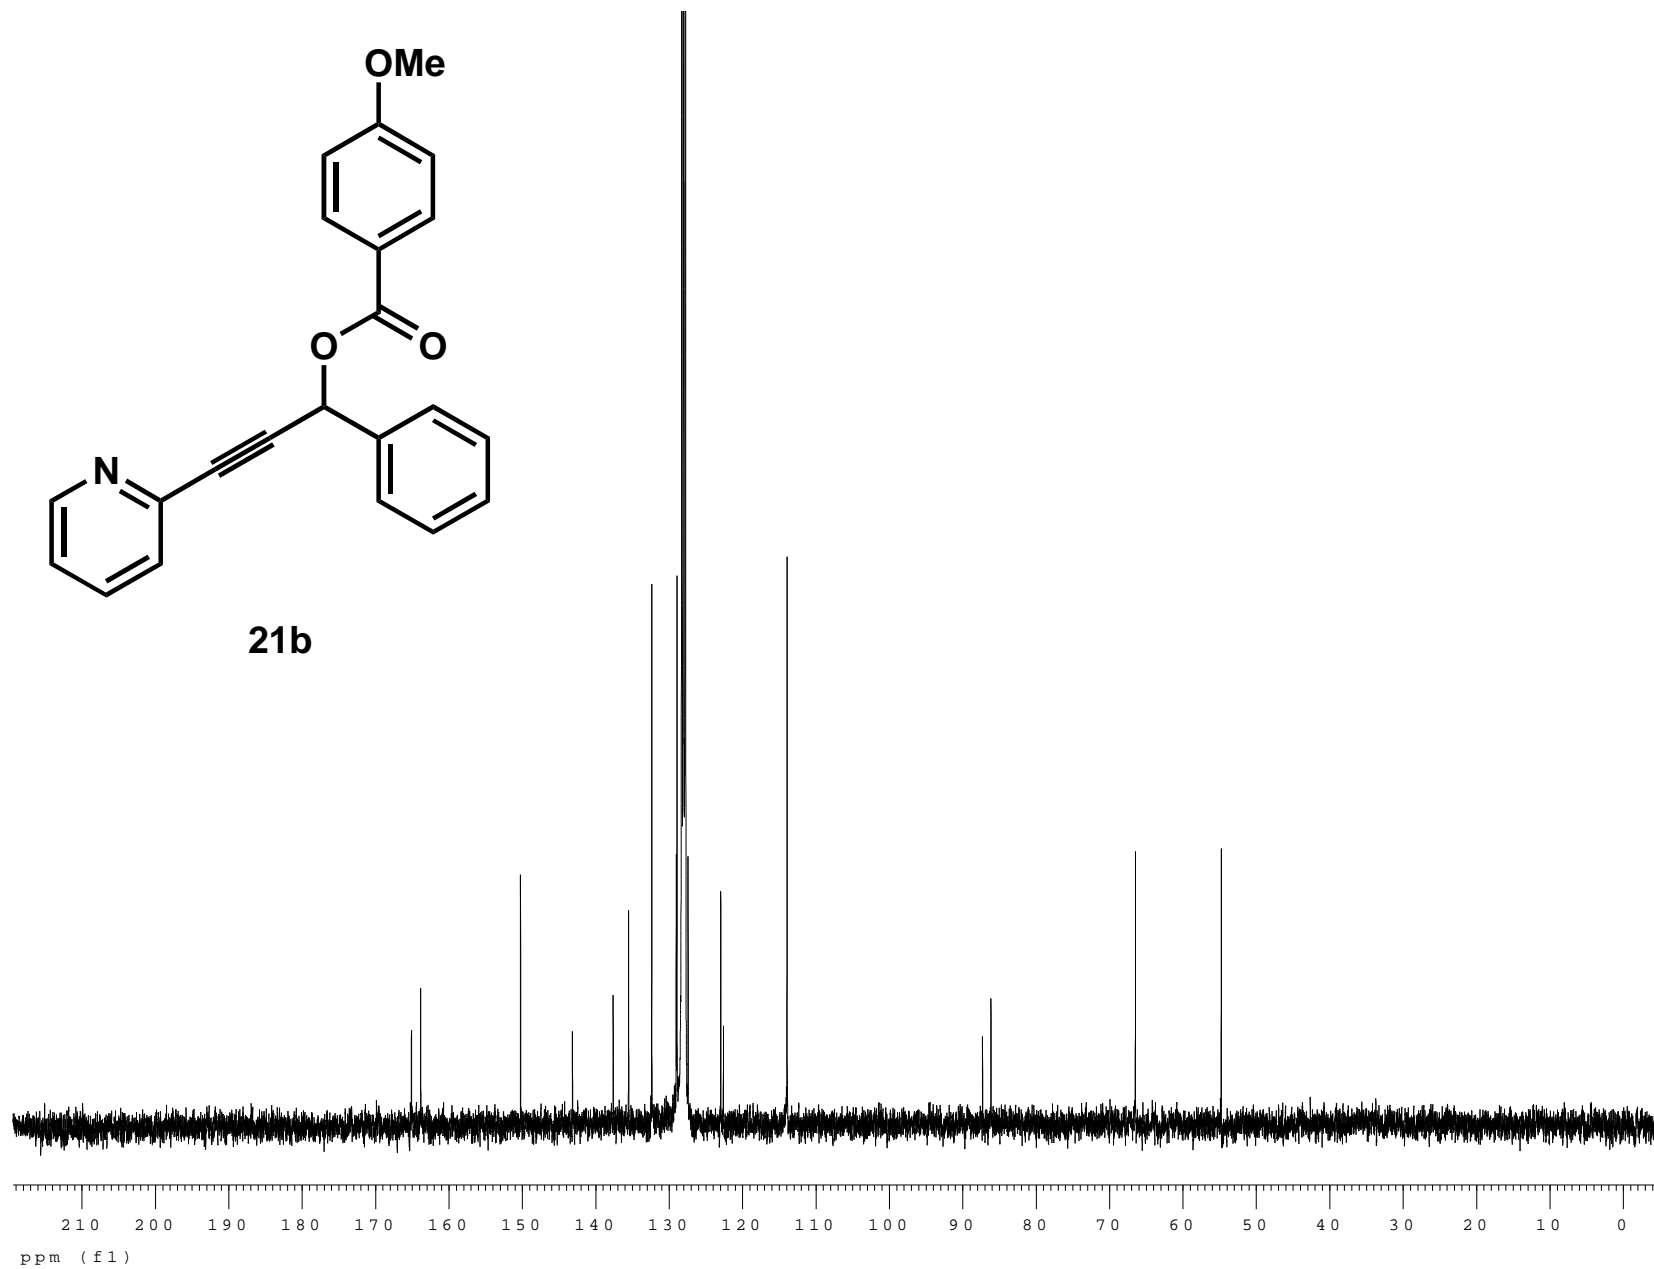



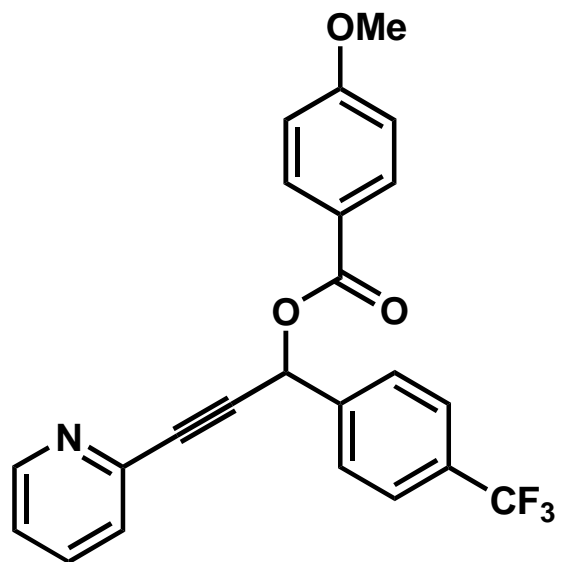

21d

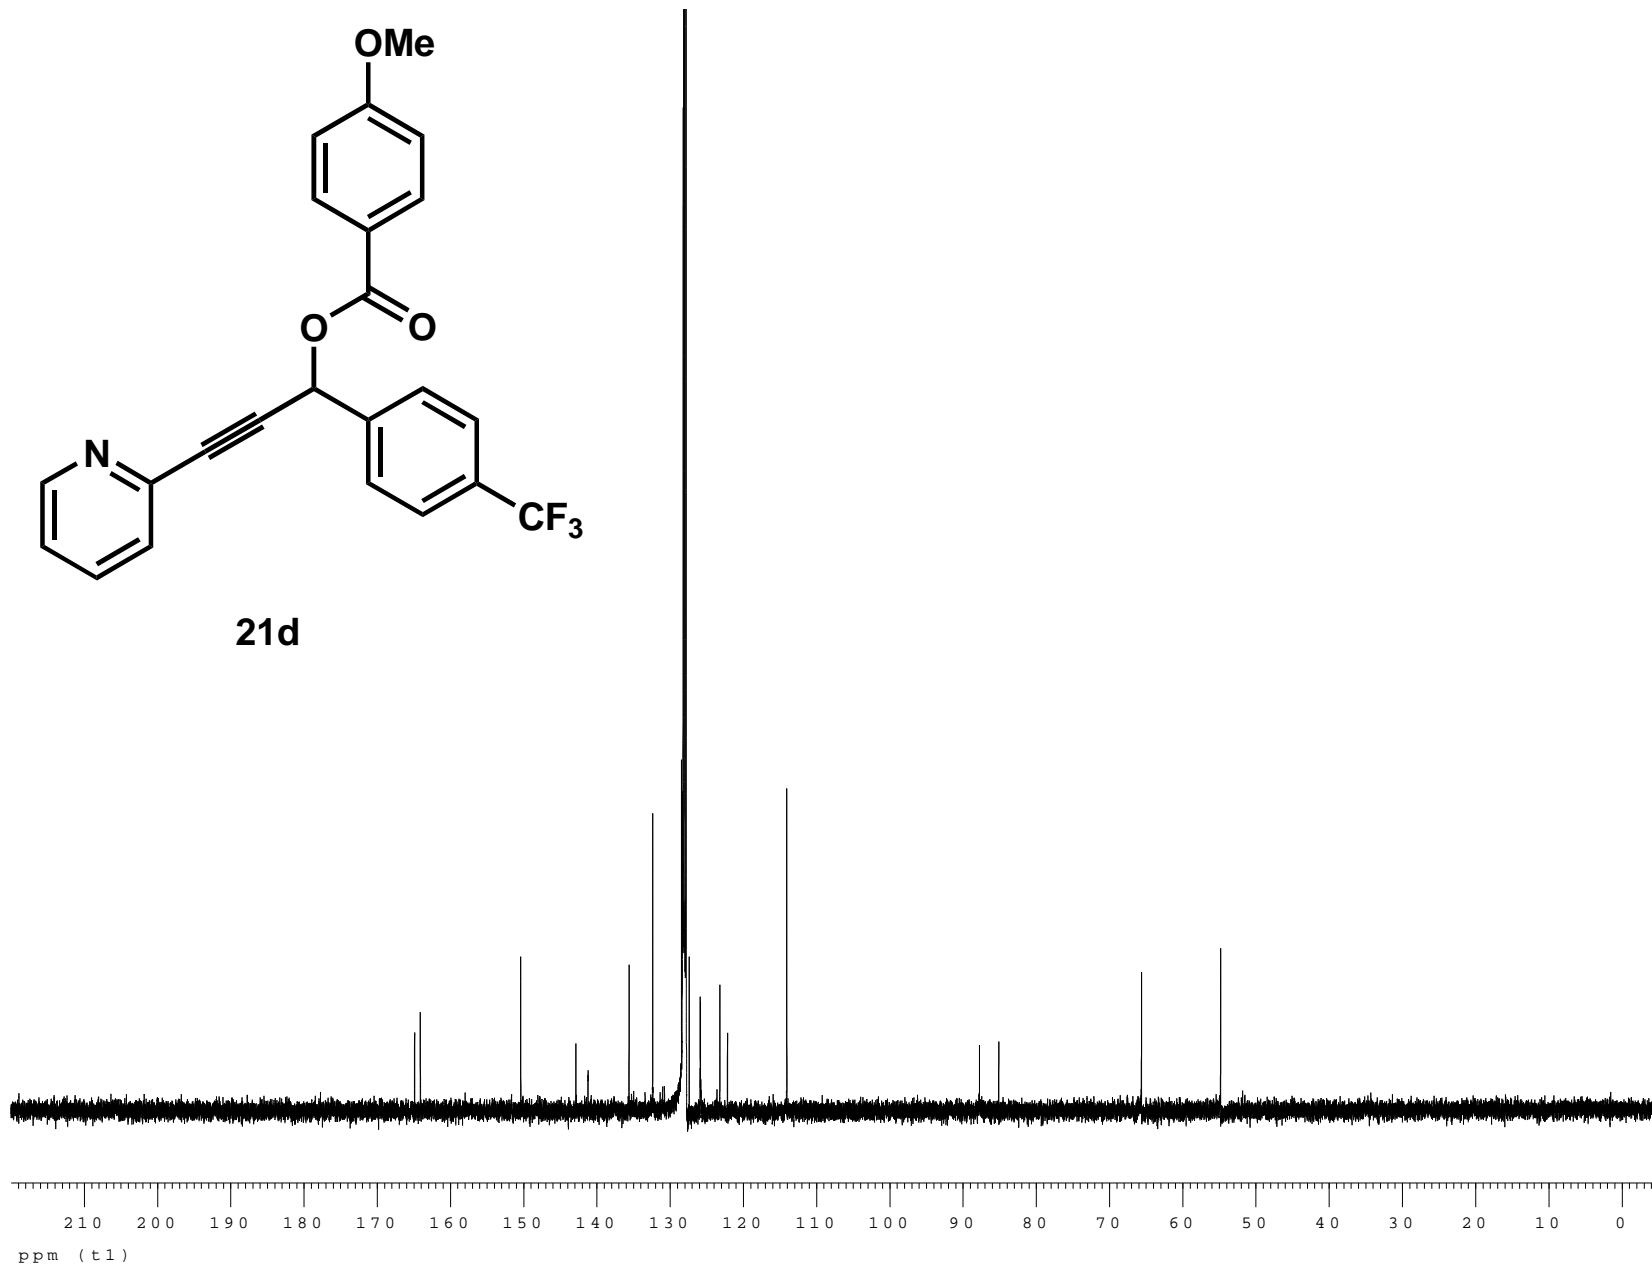



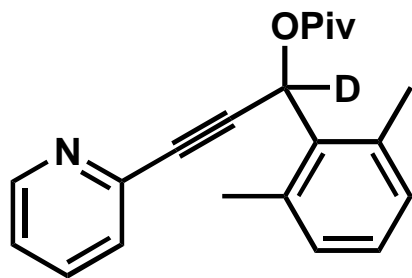

24-d

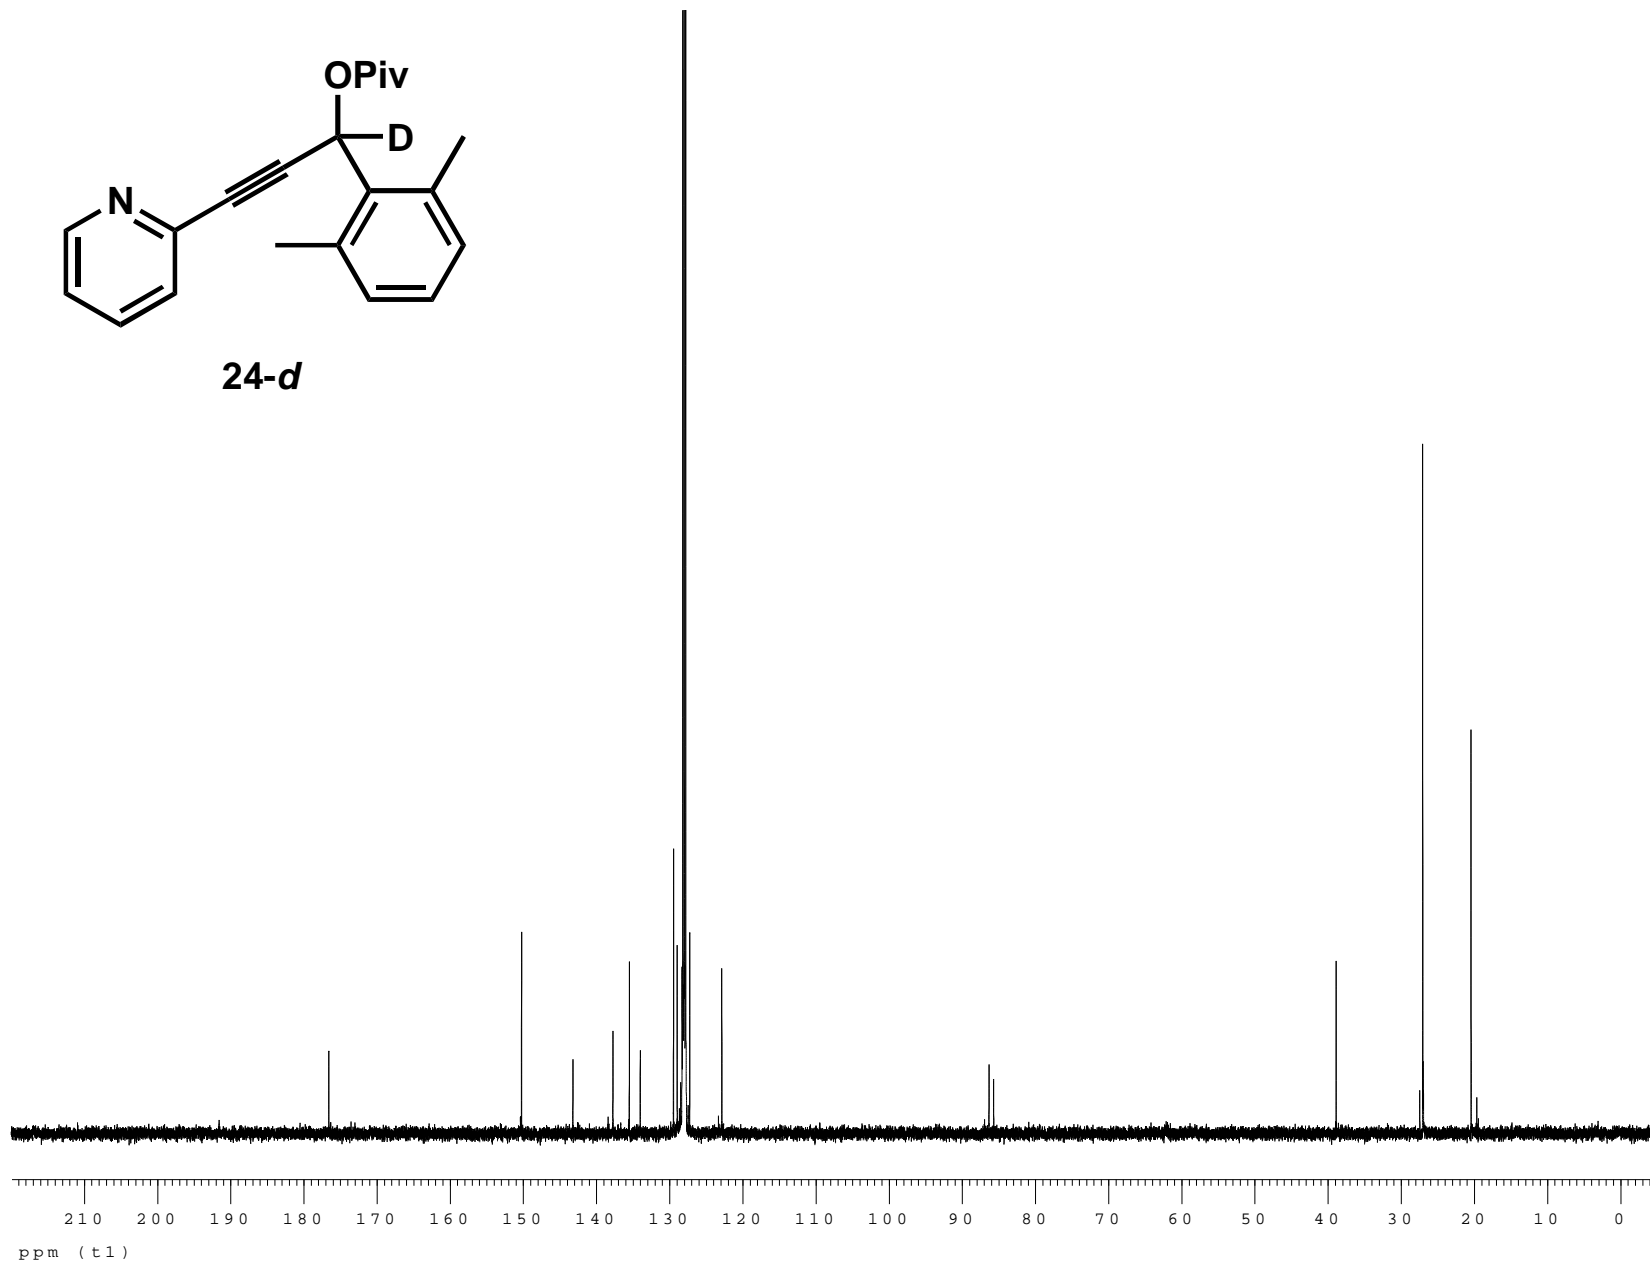

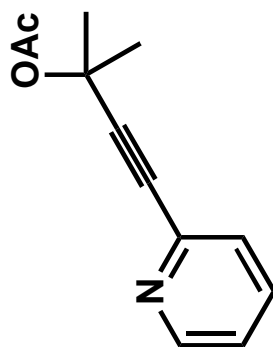

28

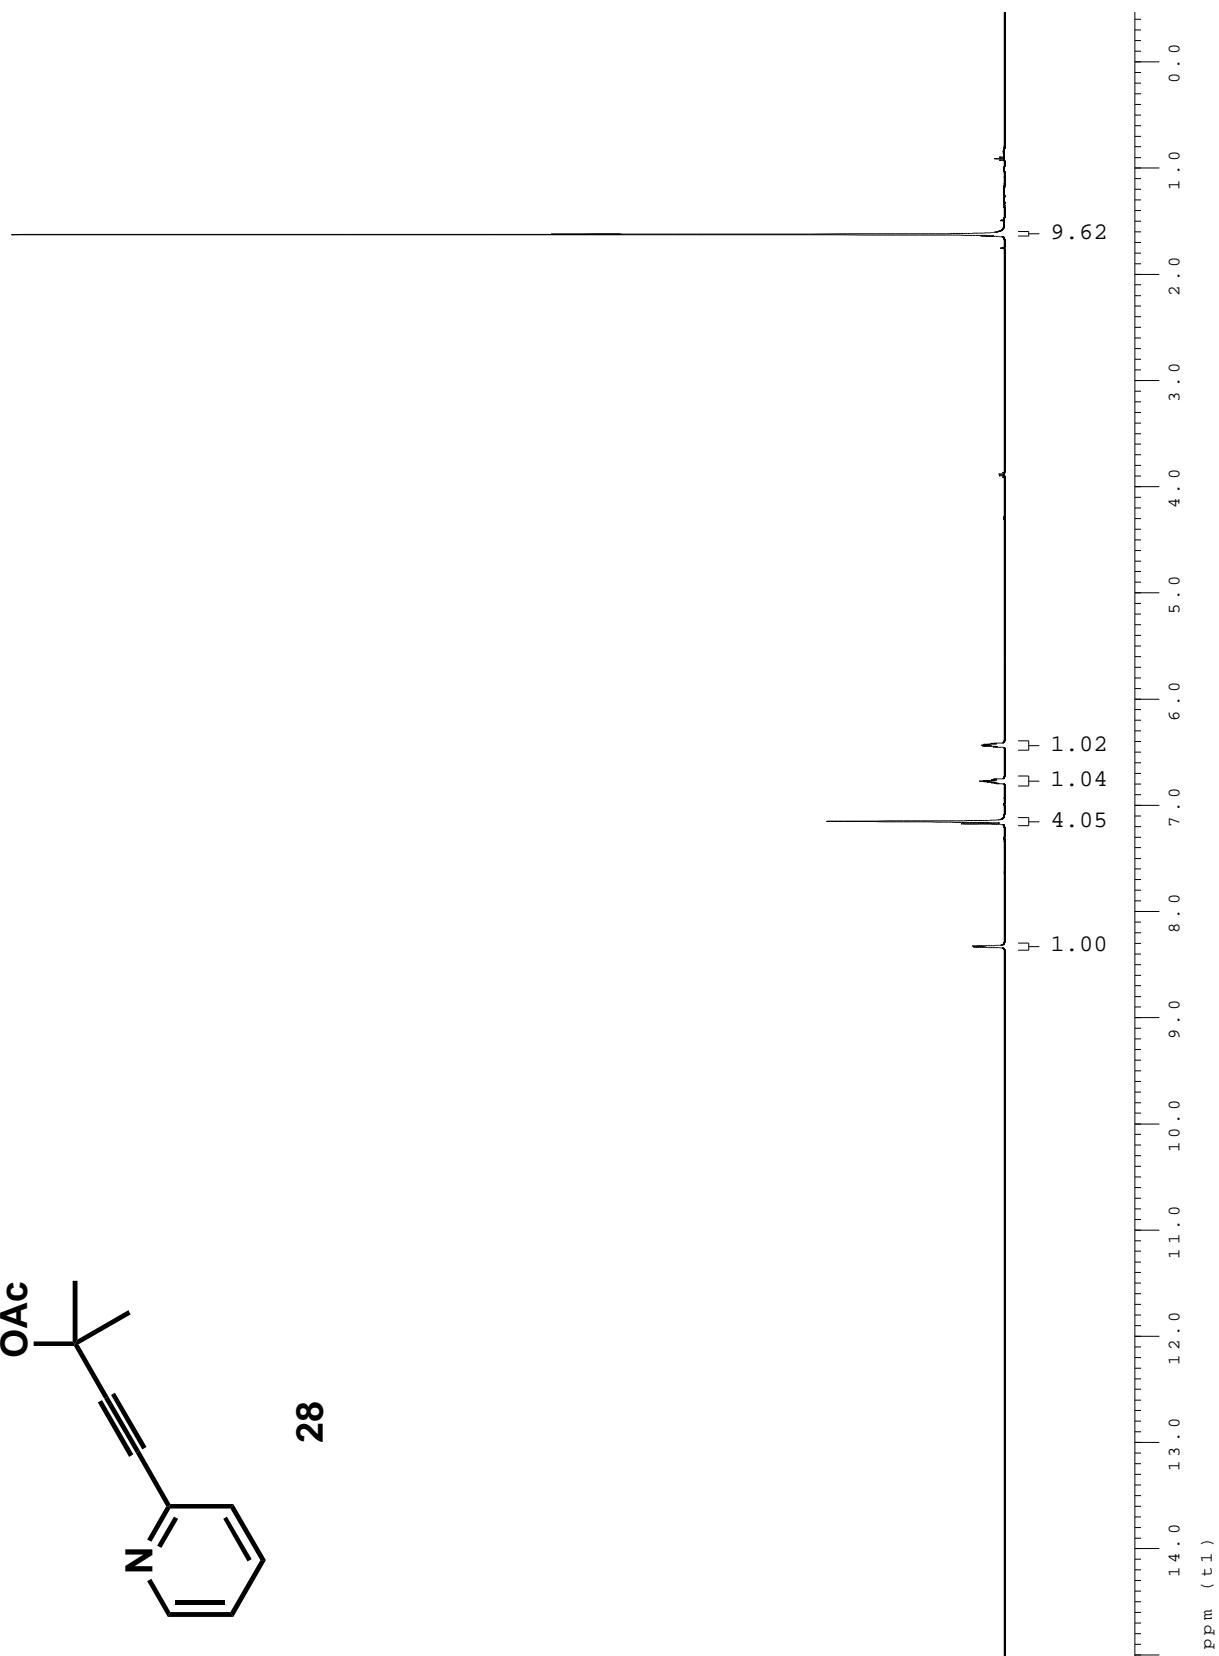



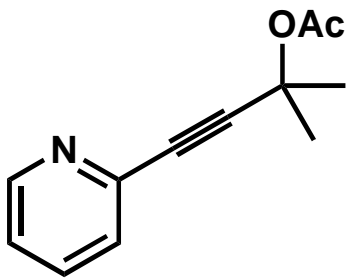

28

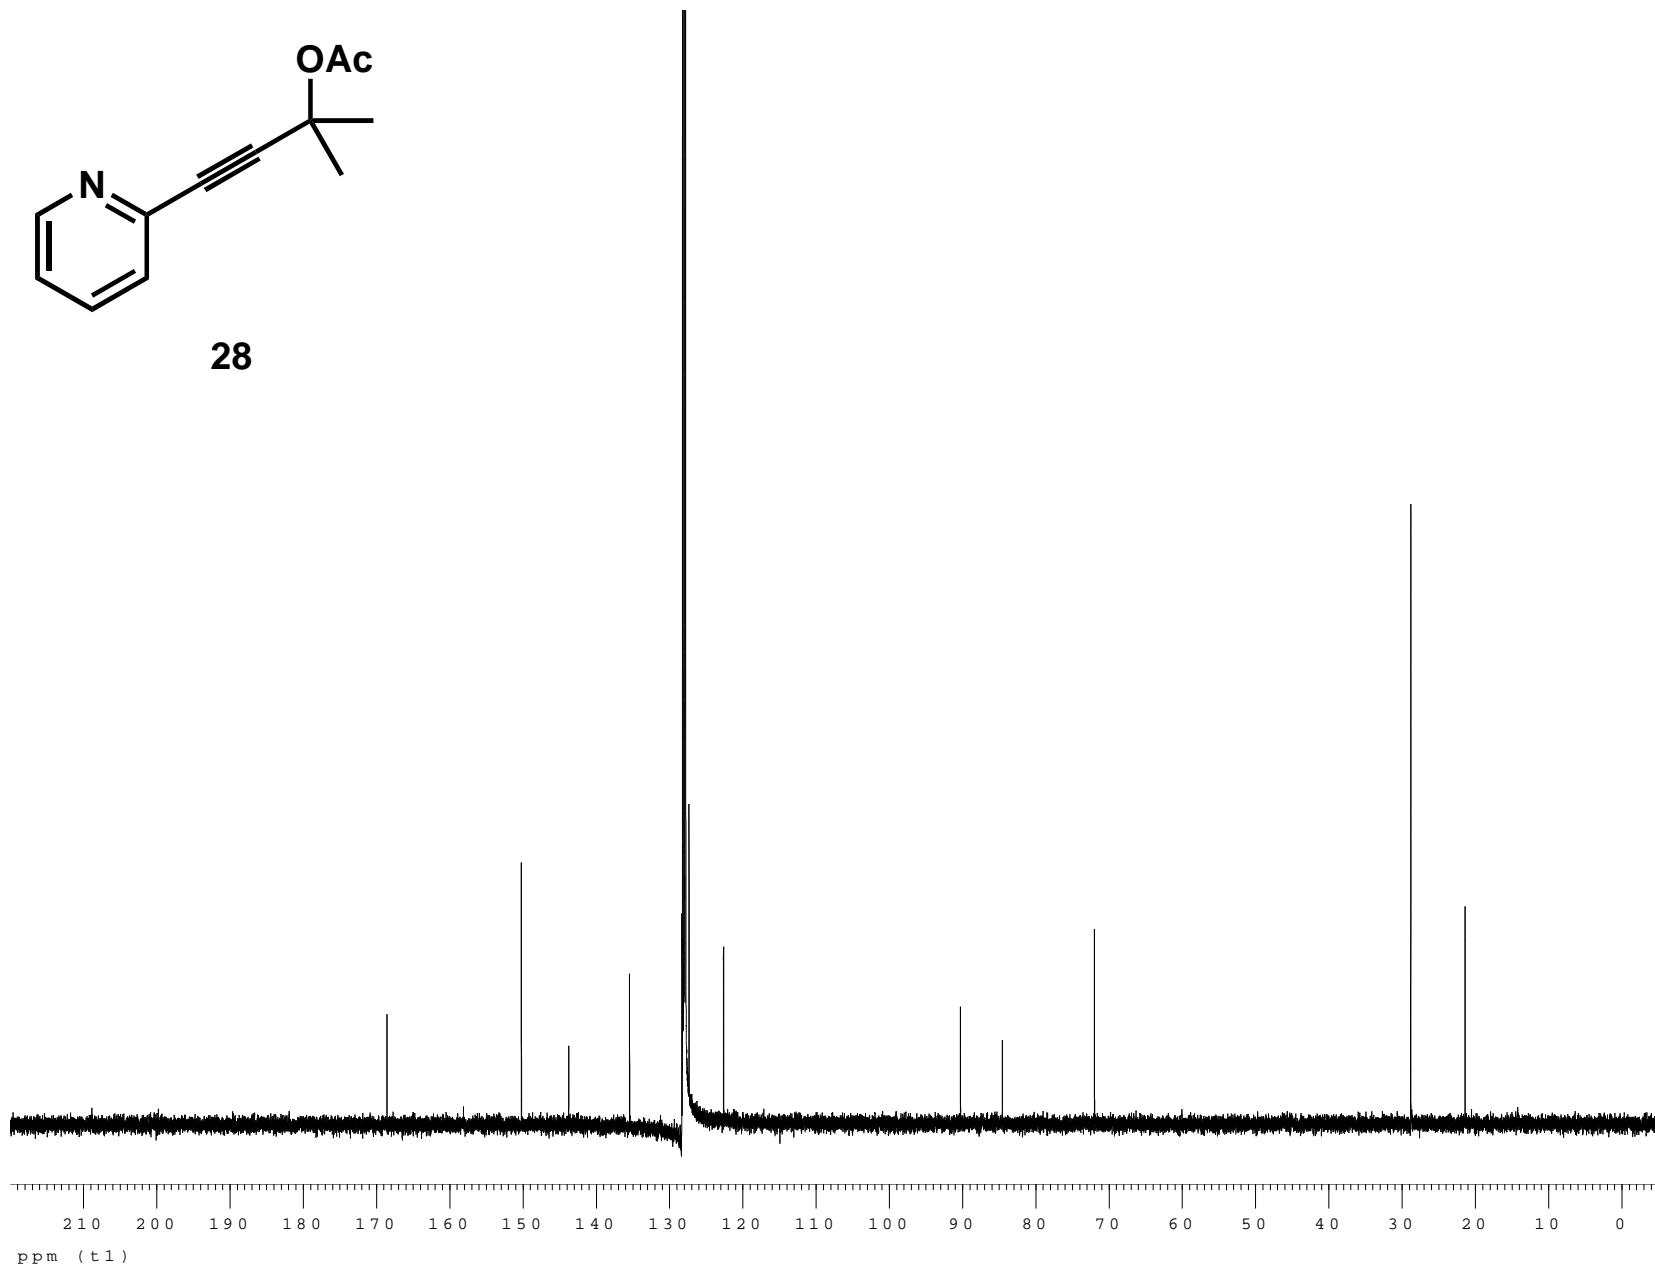

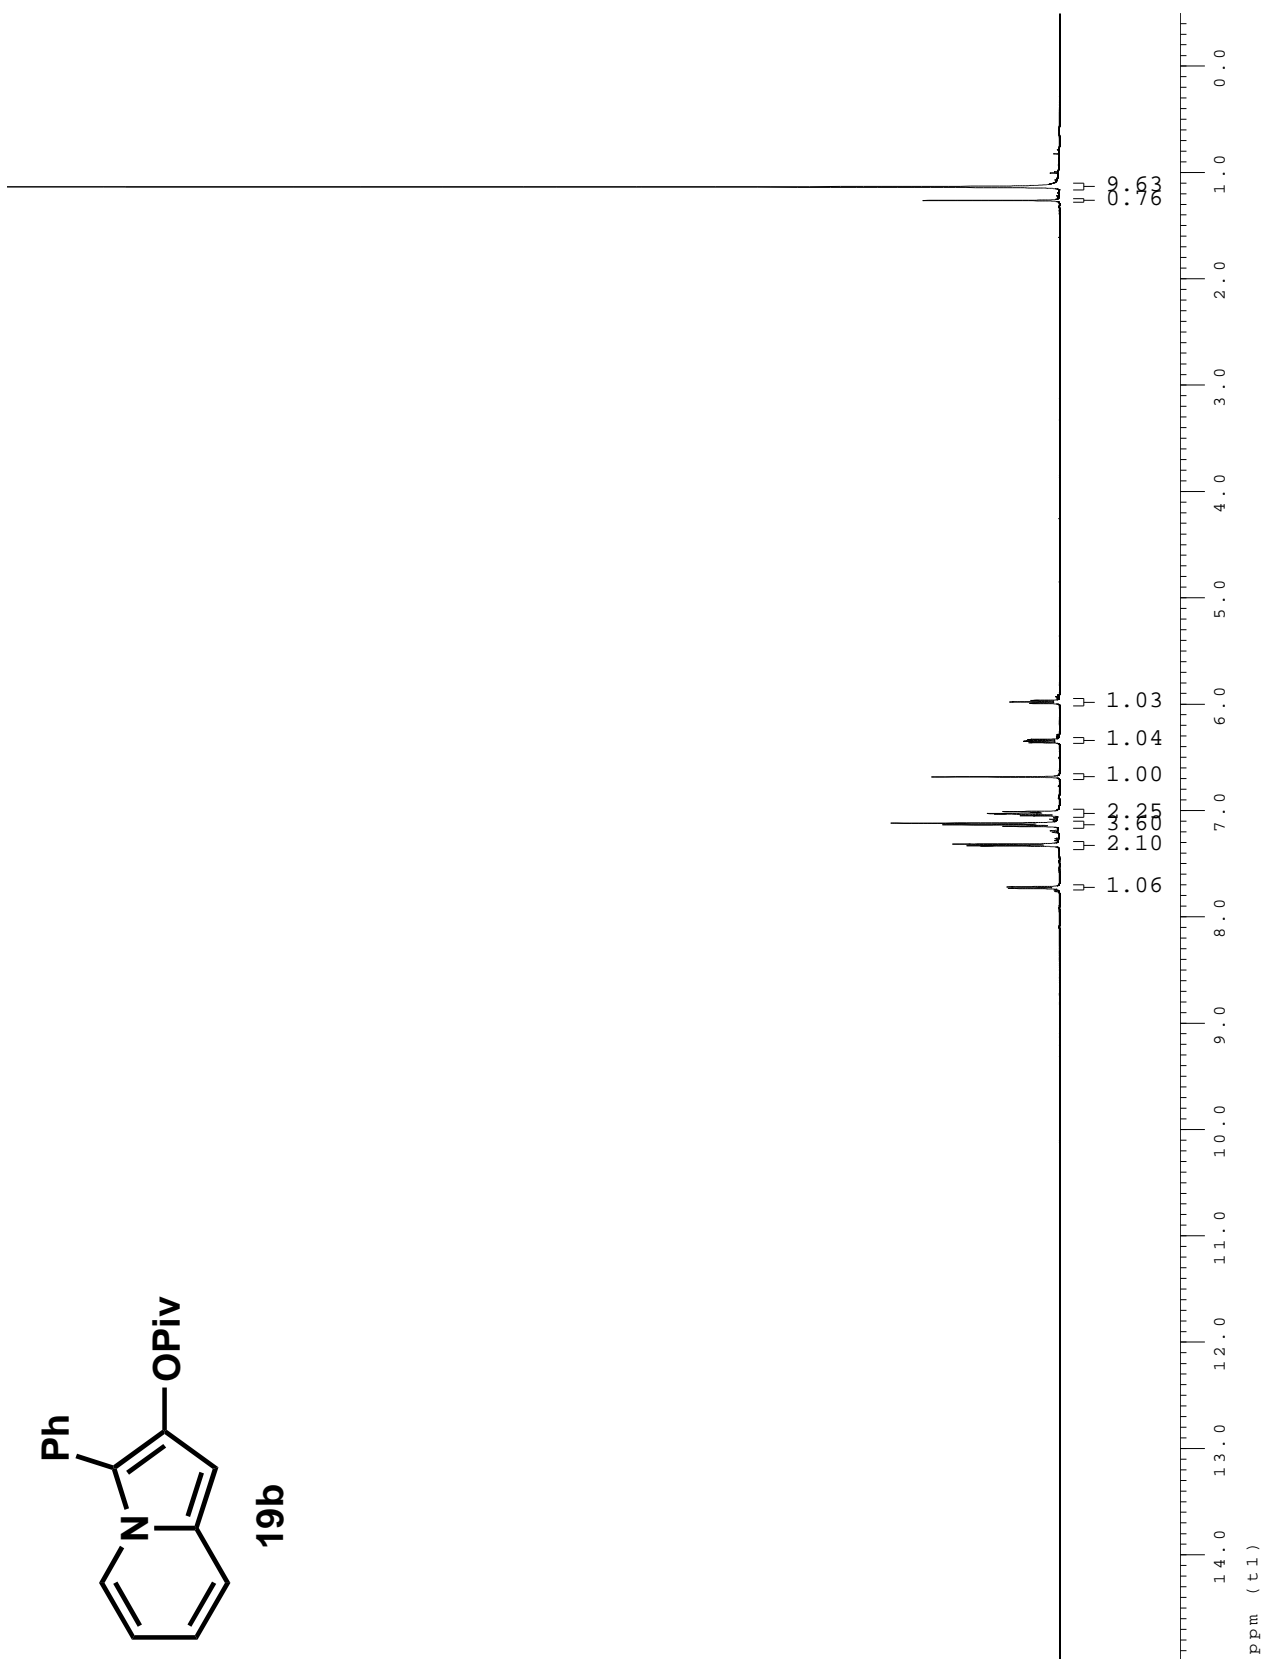

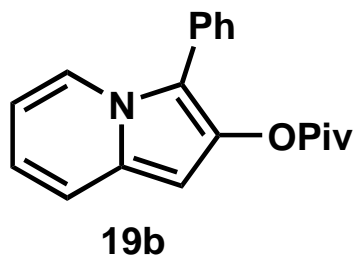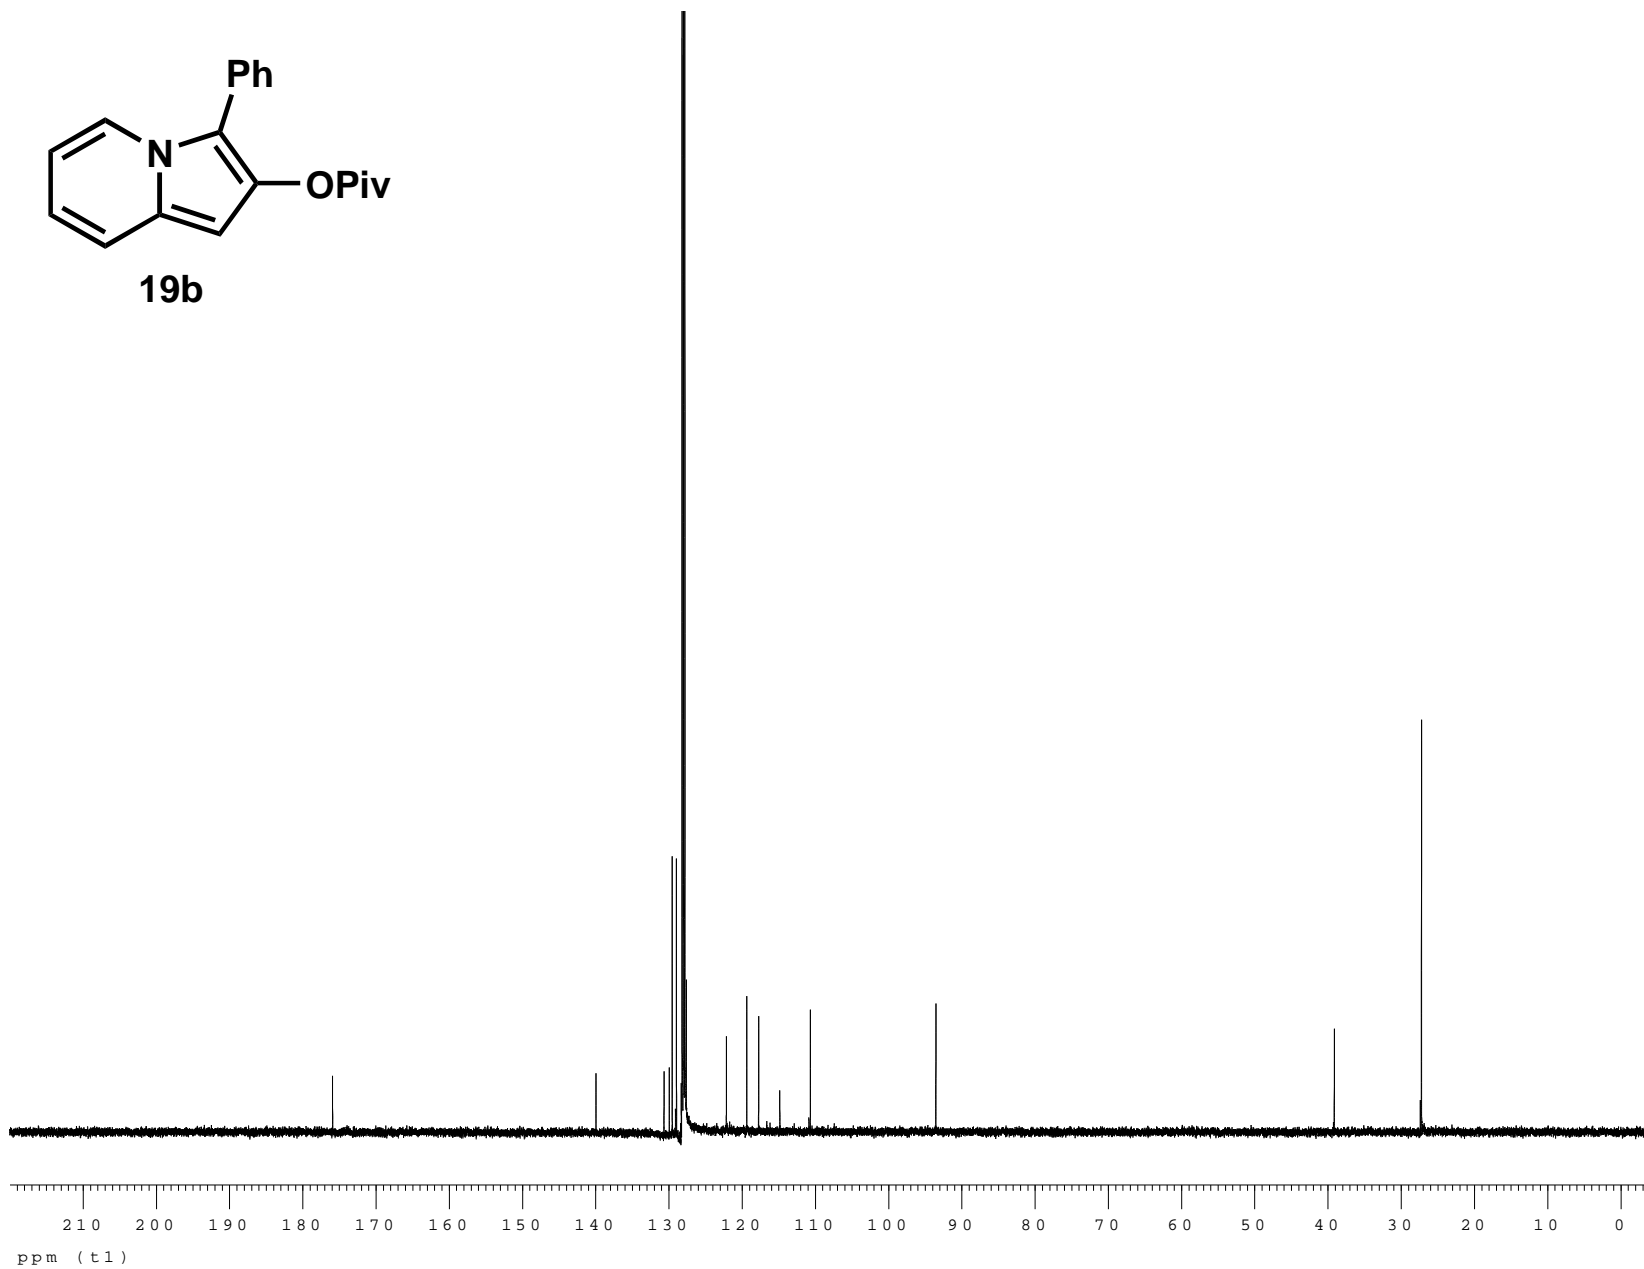

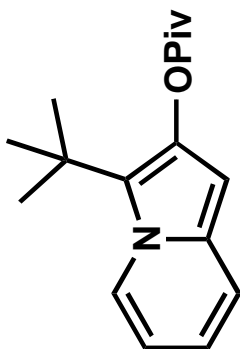

Table 2, entry 1

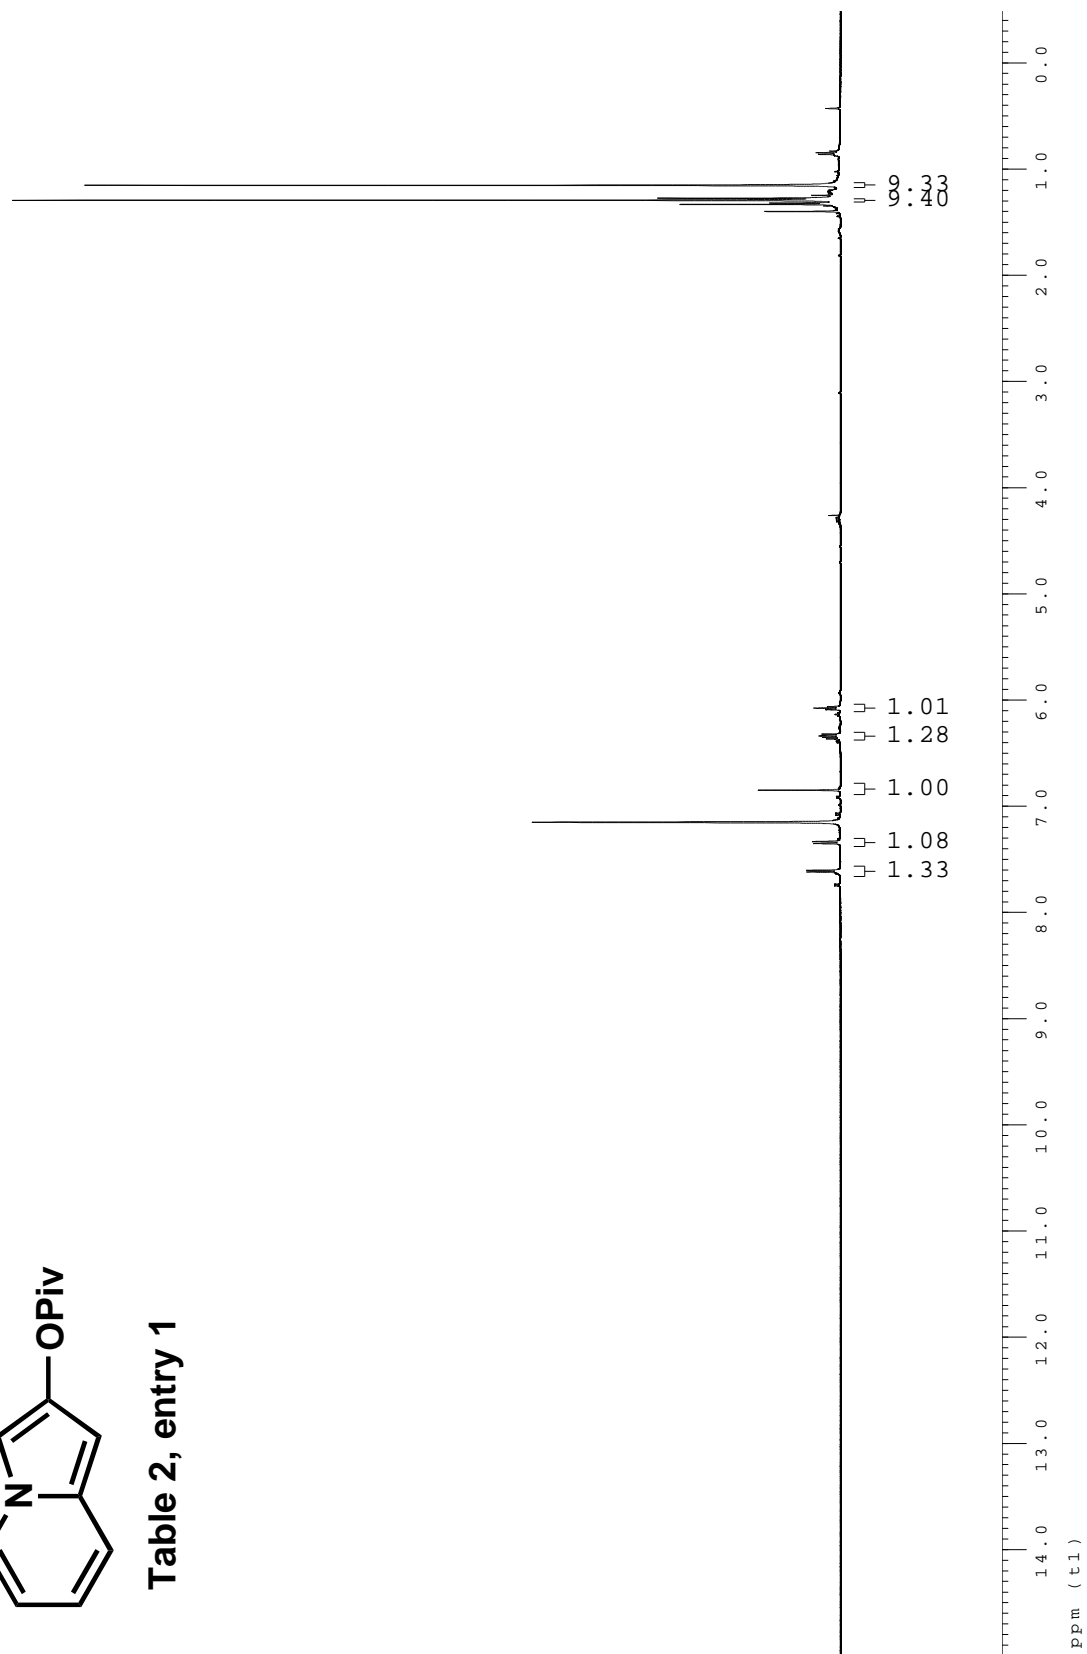

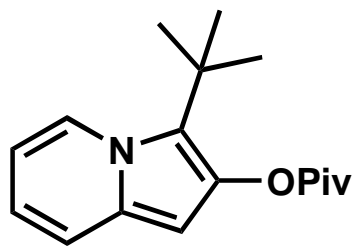

Table 2, entry 1

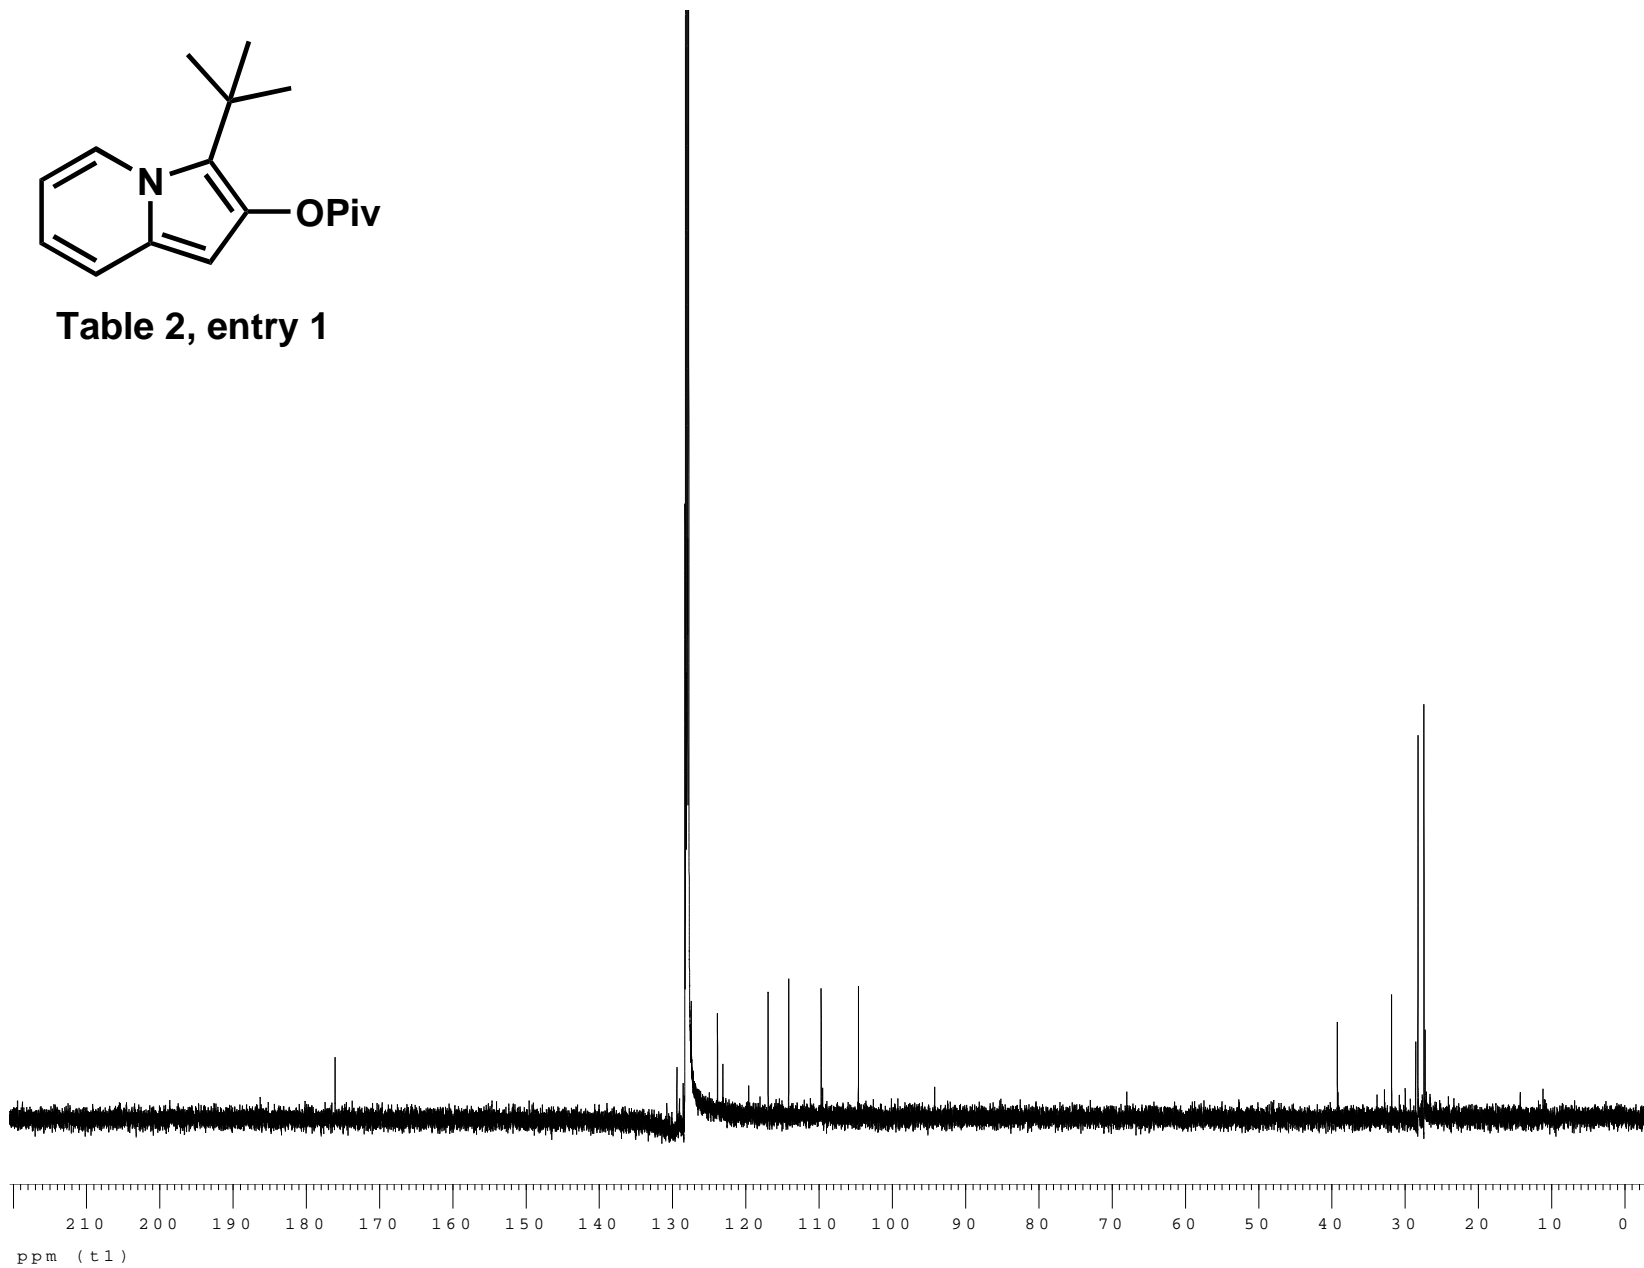



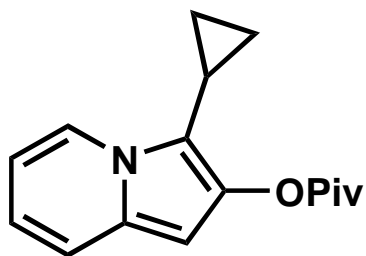

Table 2, entry 2

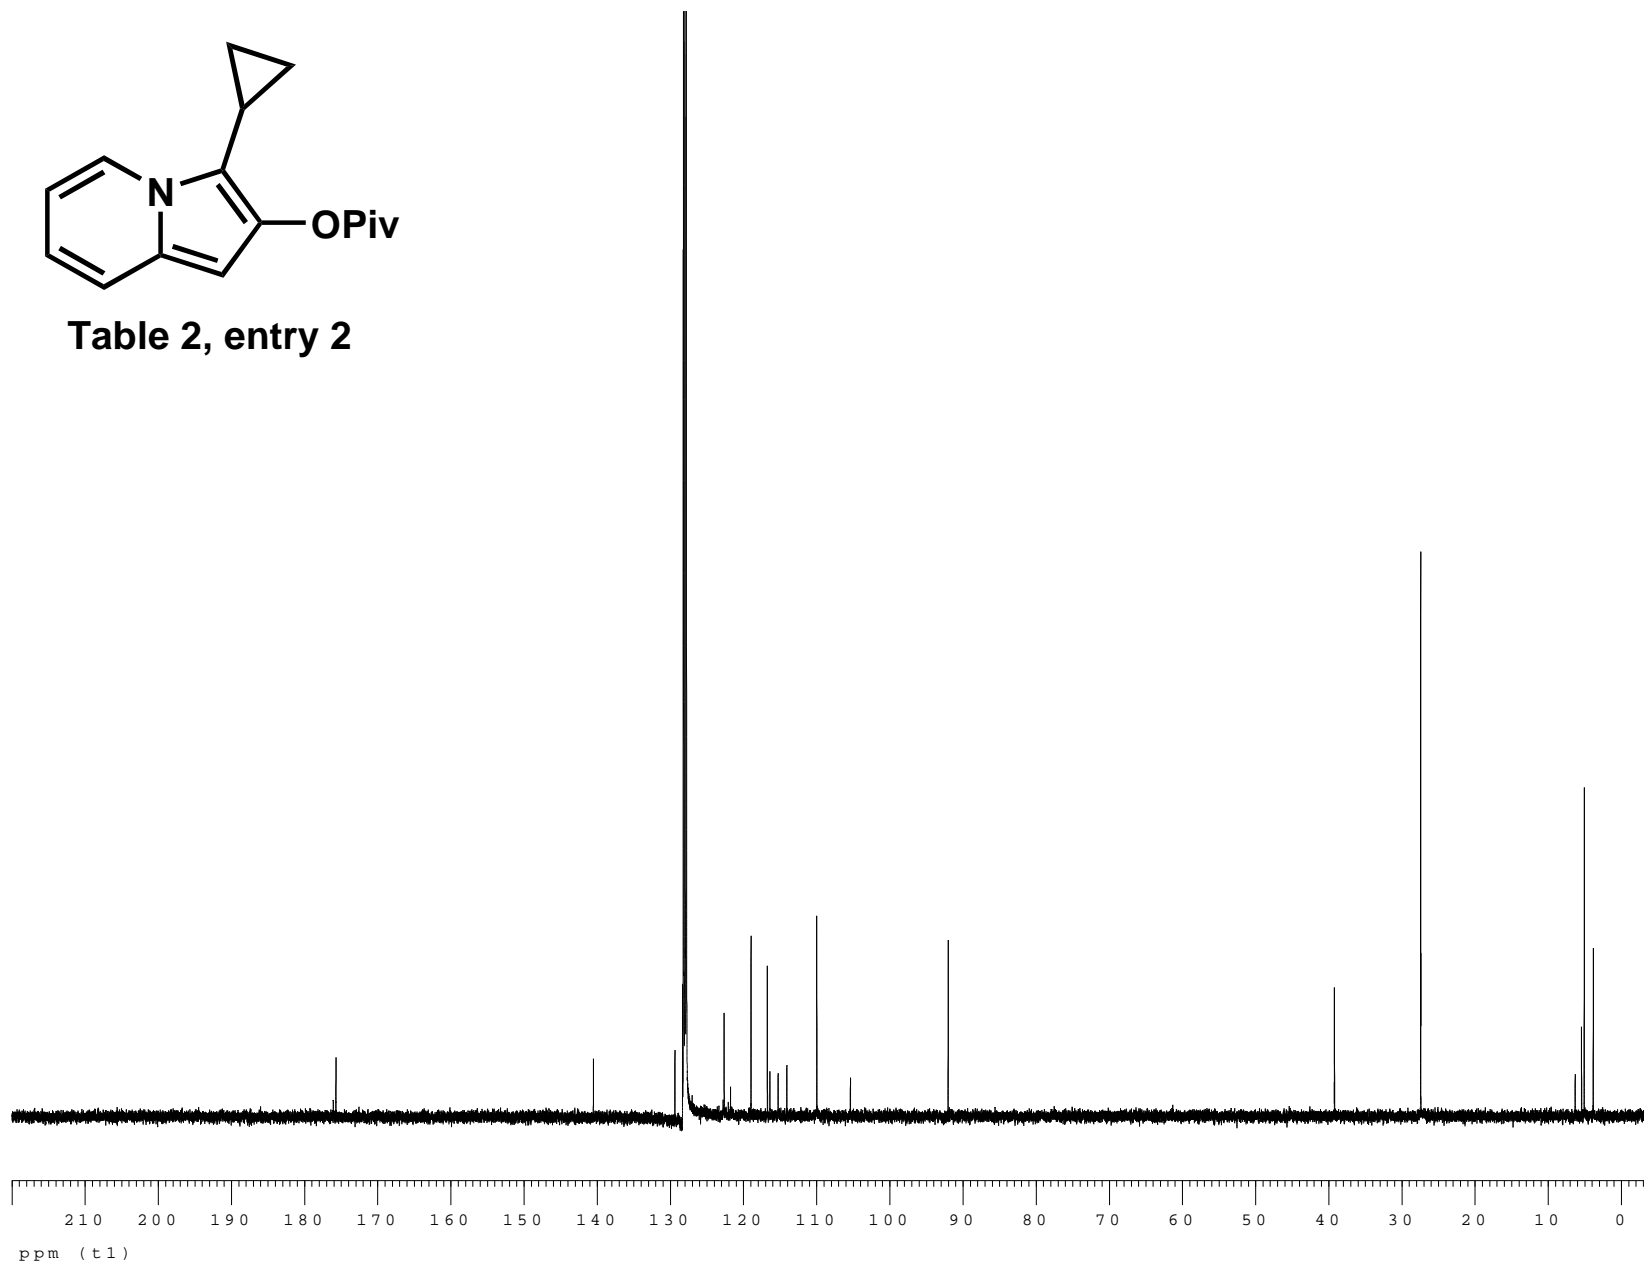

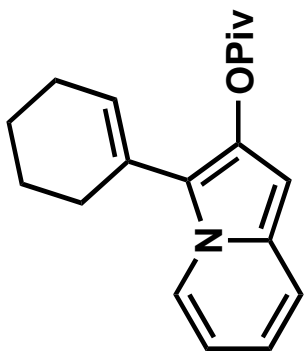

Table 2, entry 3

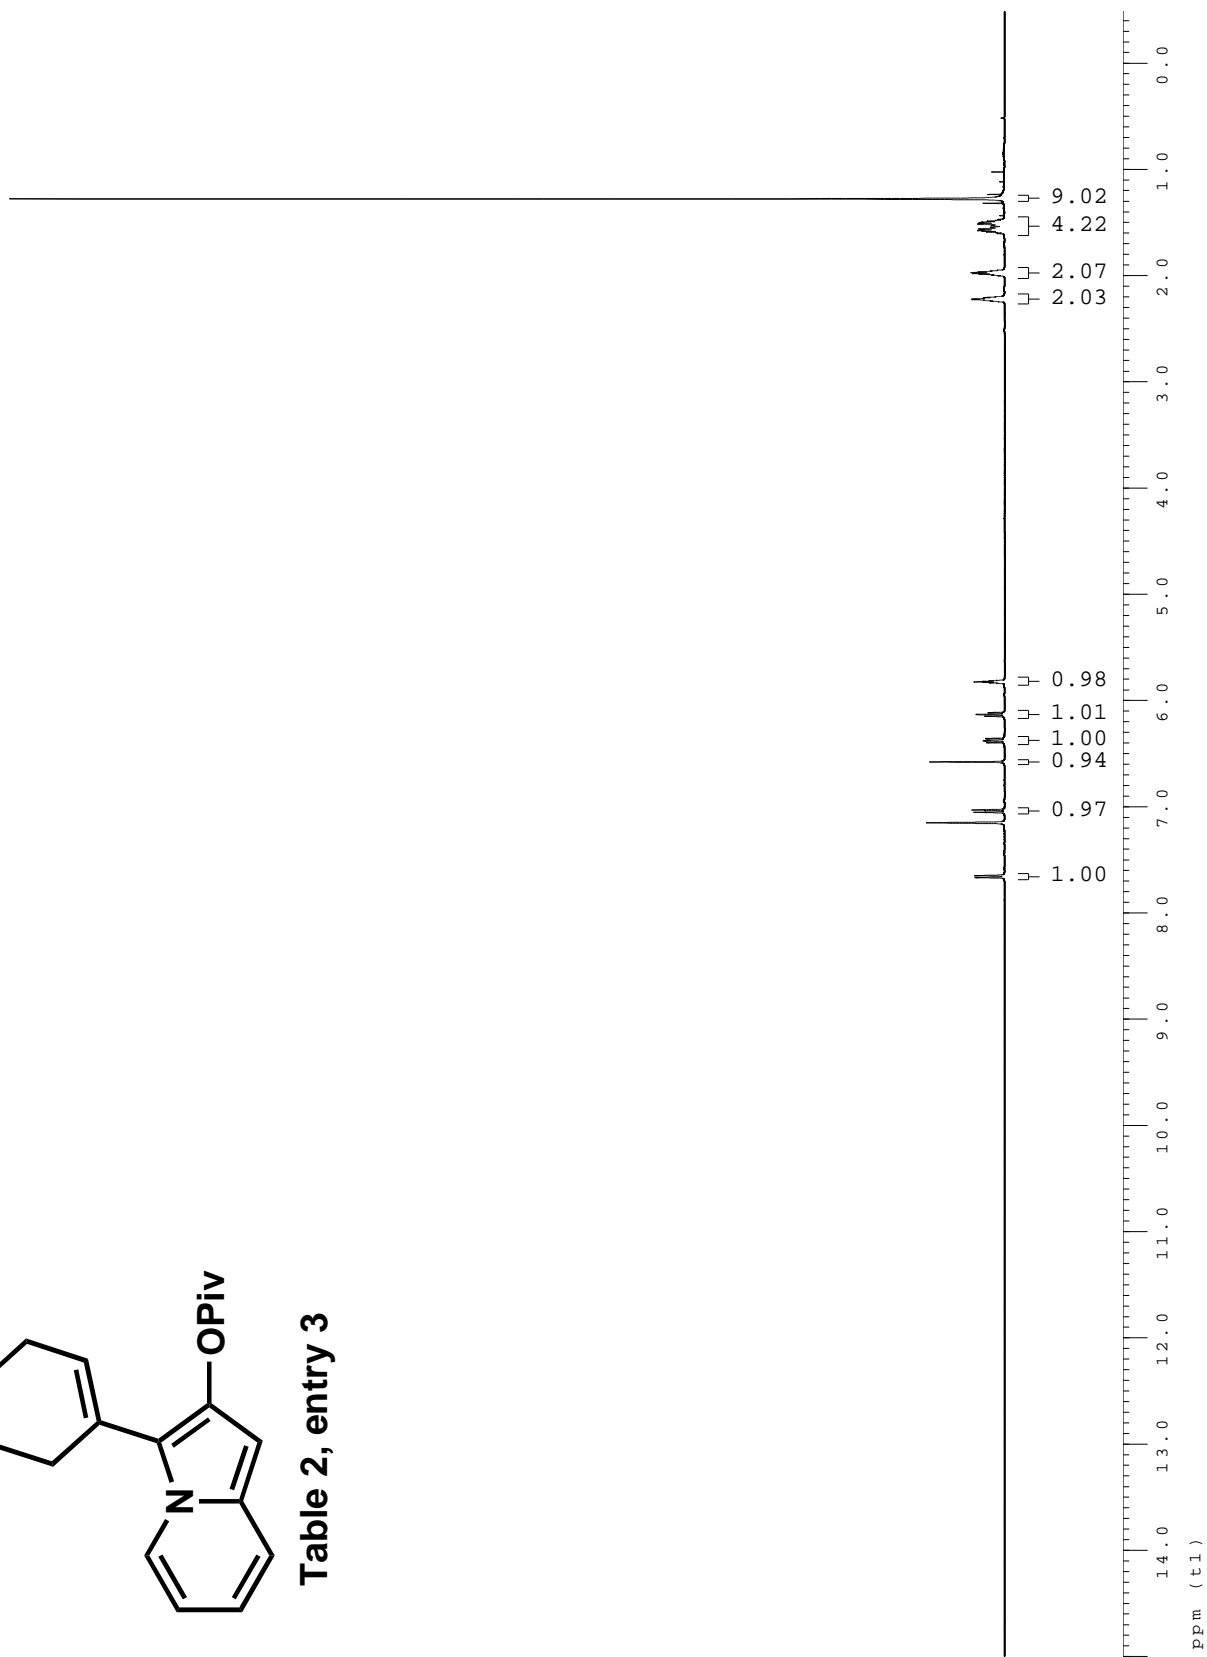



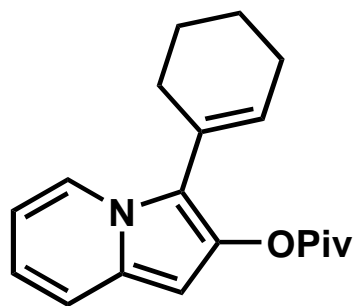

Table 2, entry 3

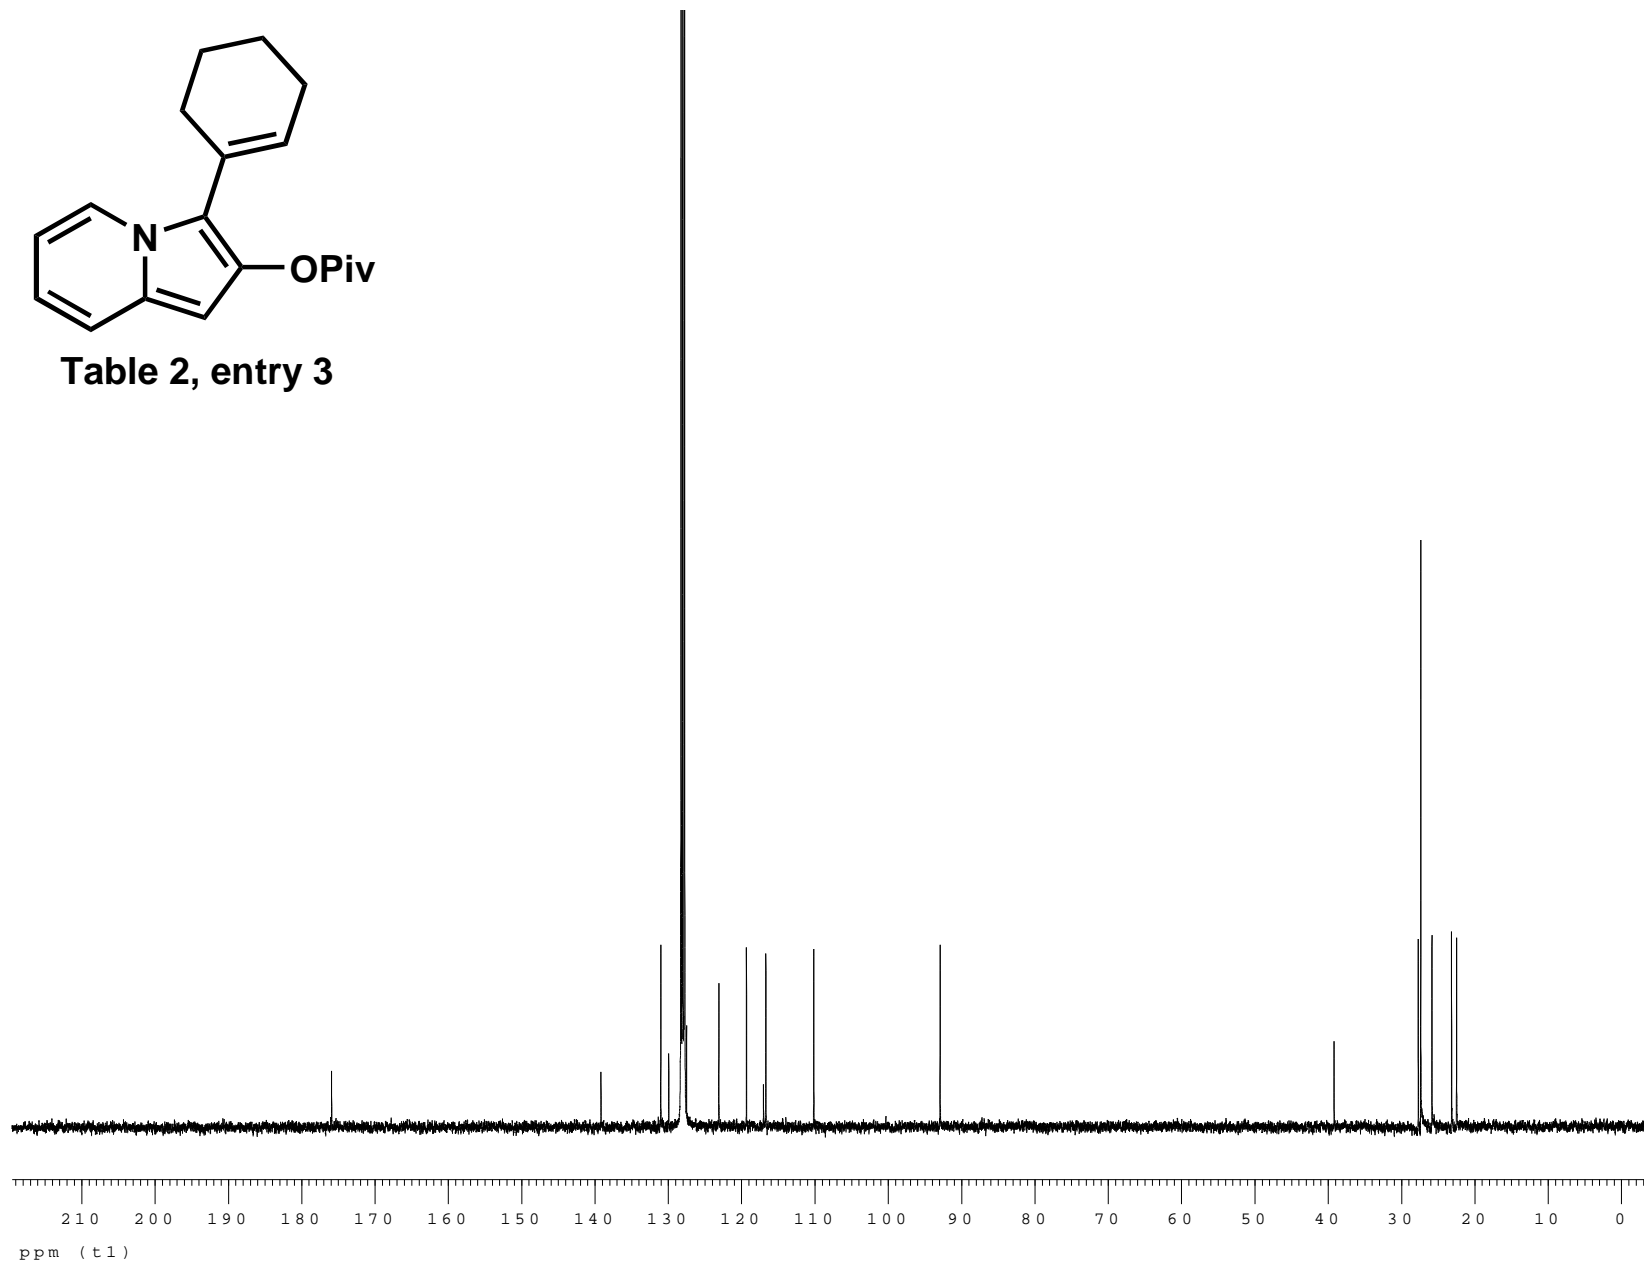

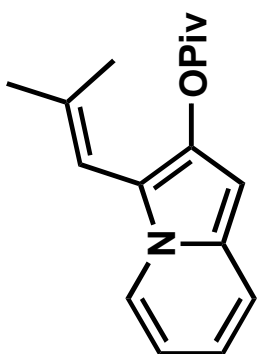

Table 2, entry 4

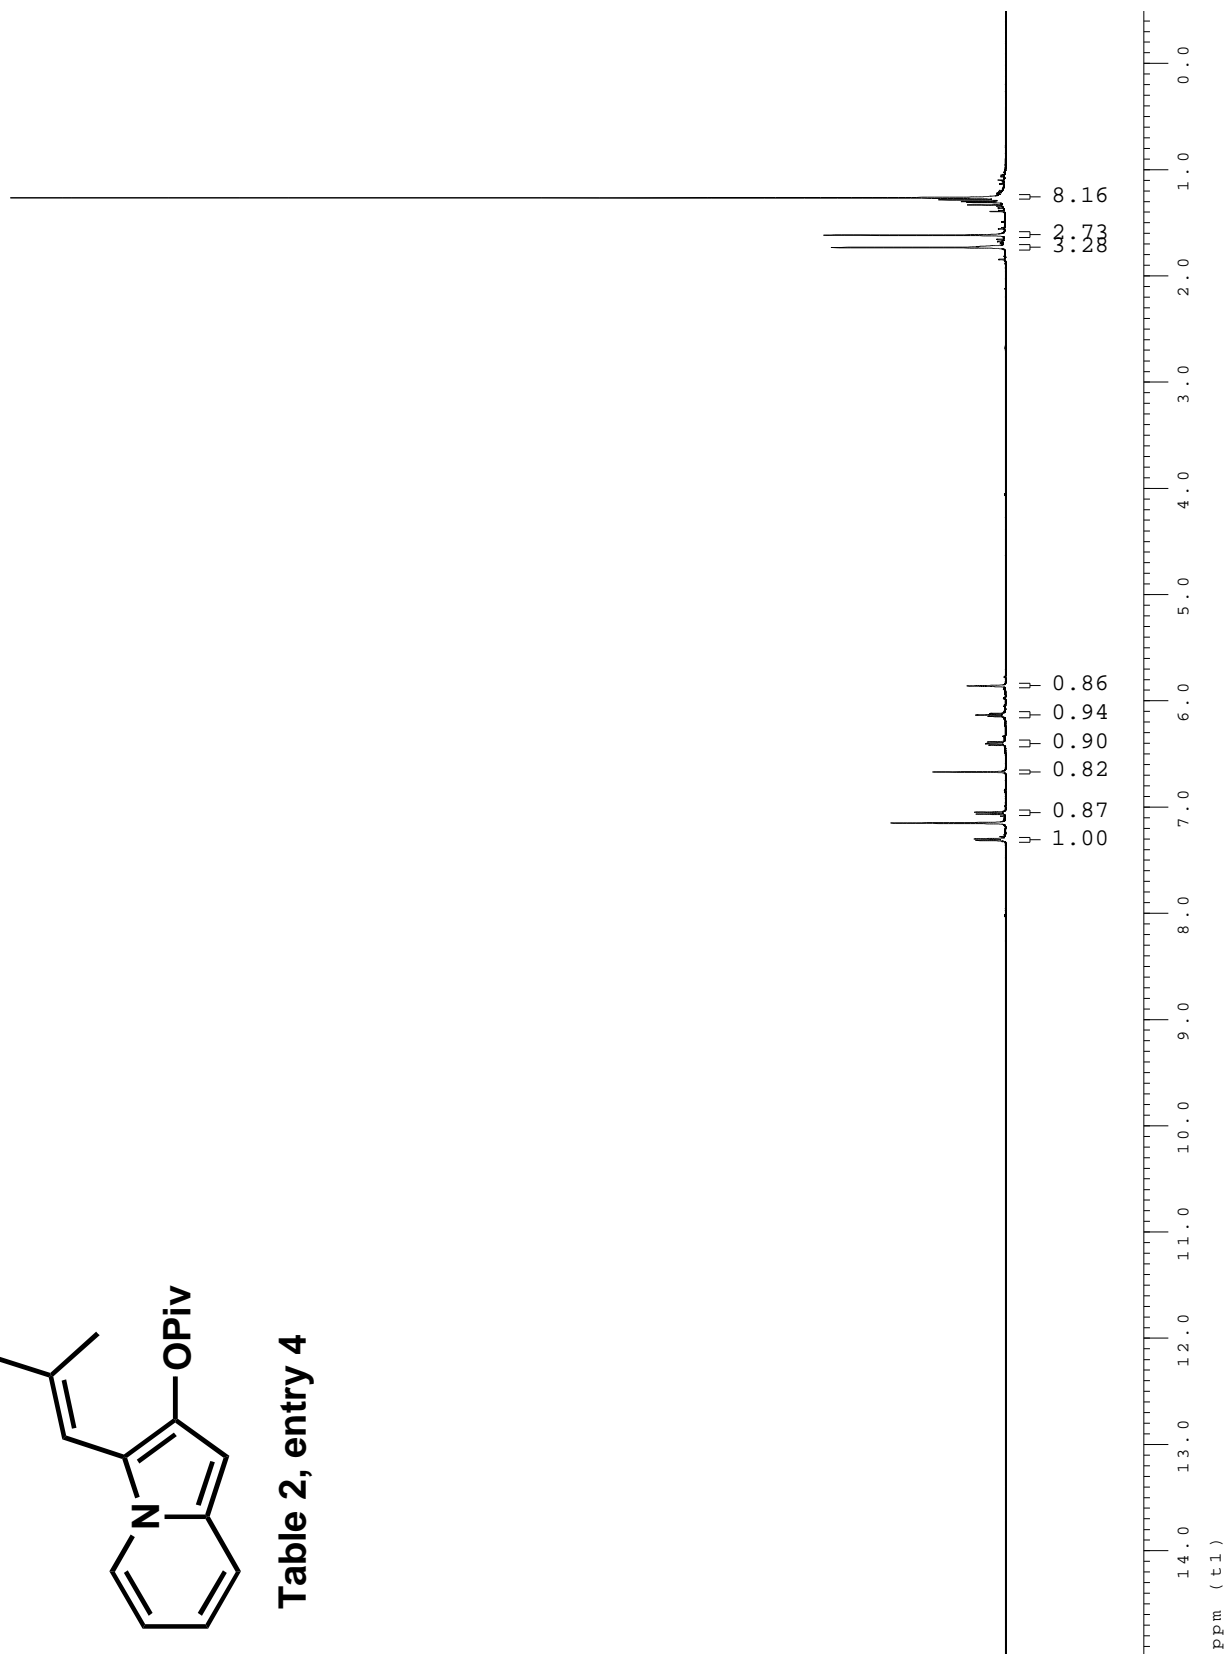

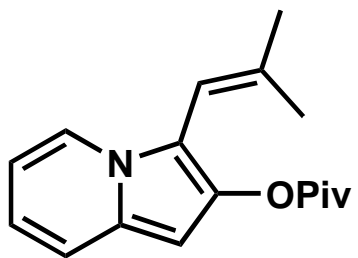

Table 2, entry 4

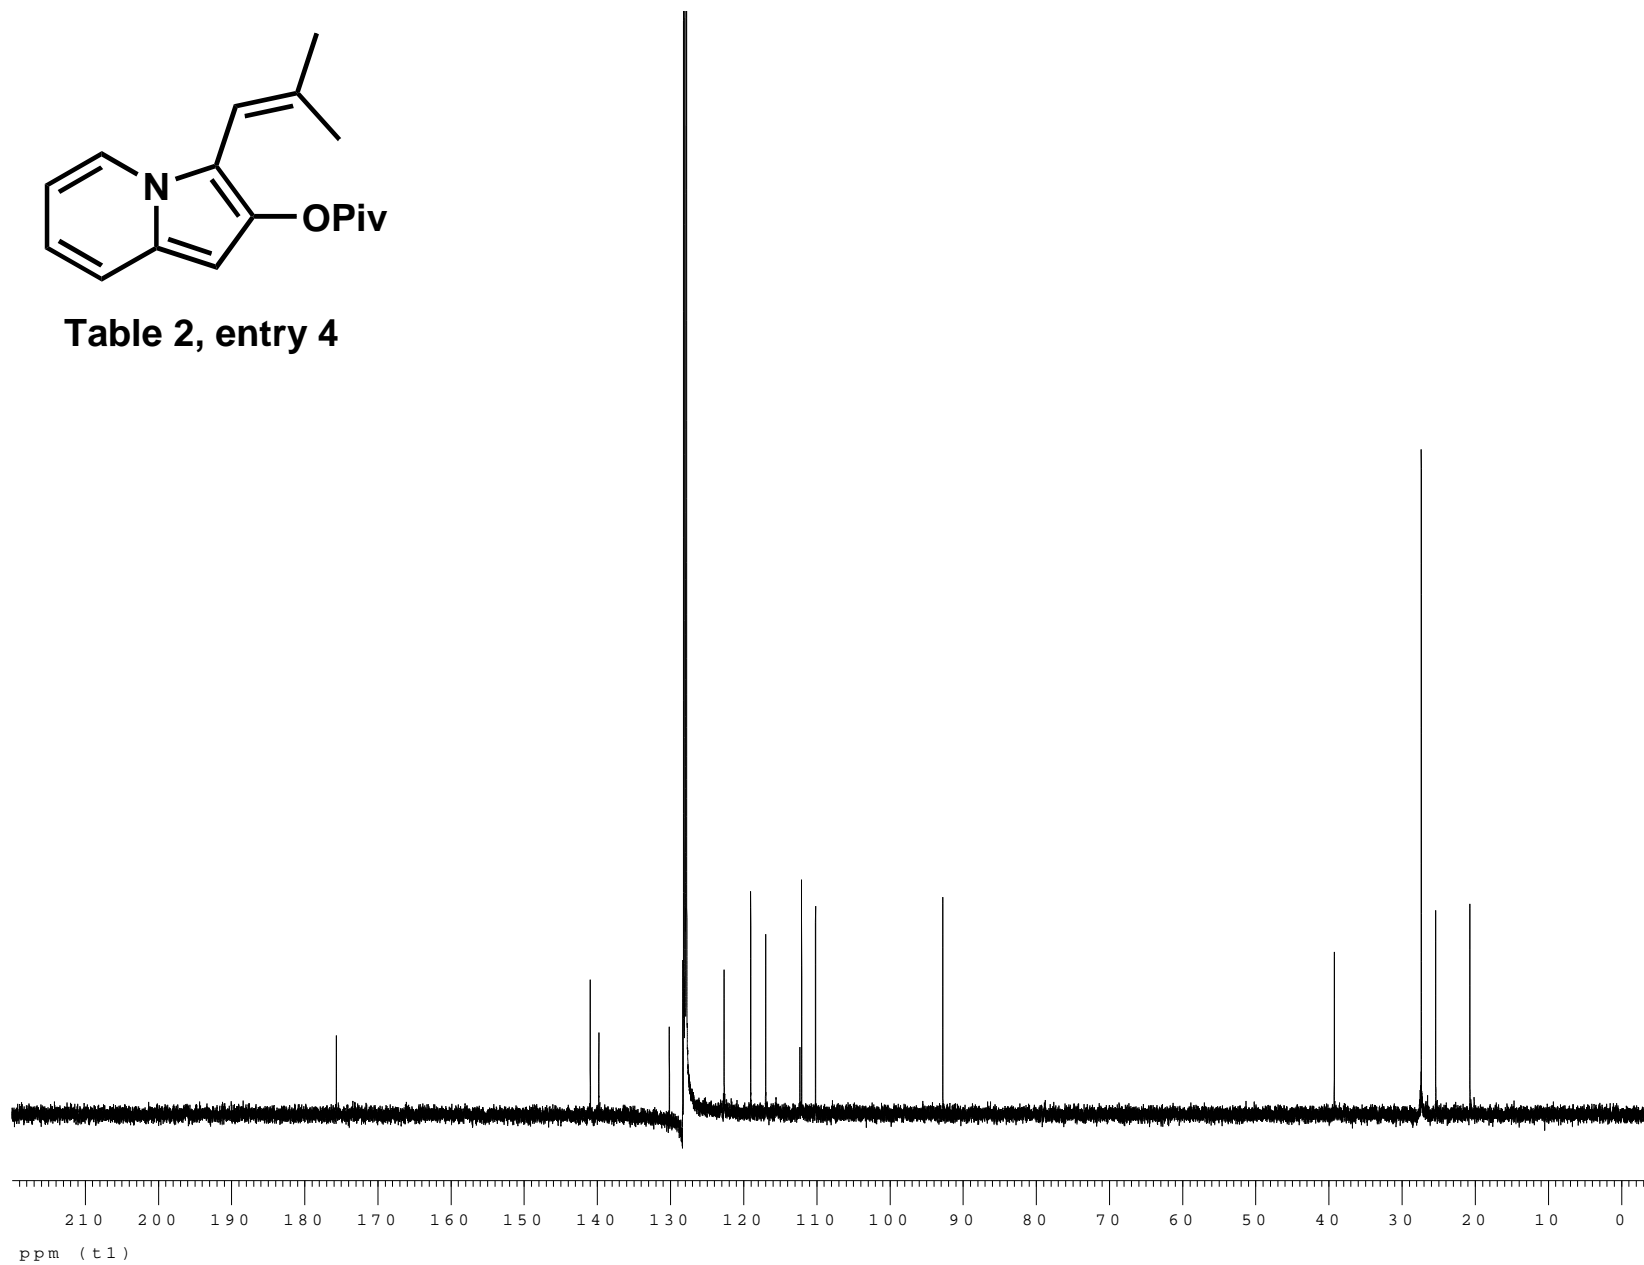

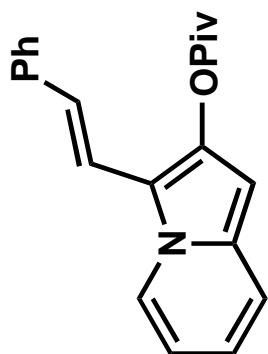

Table 2, entry 5

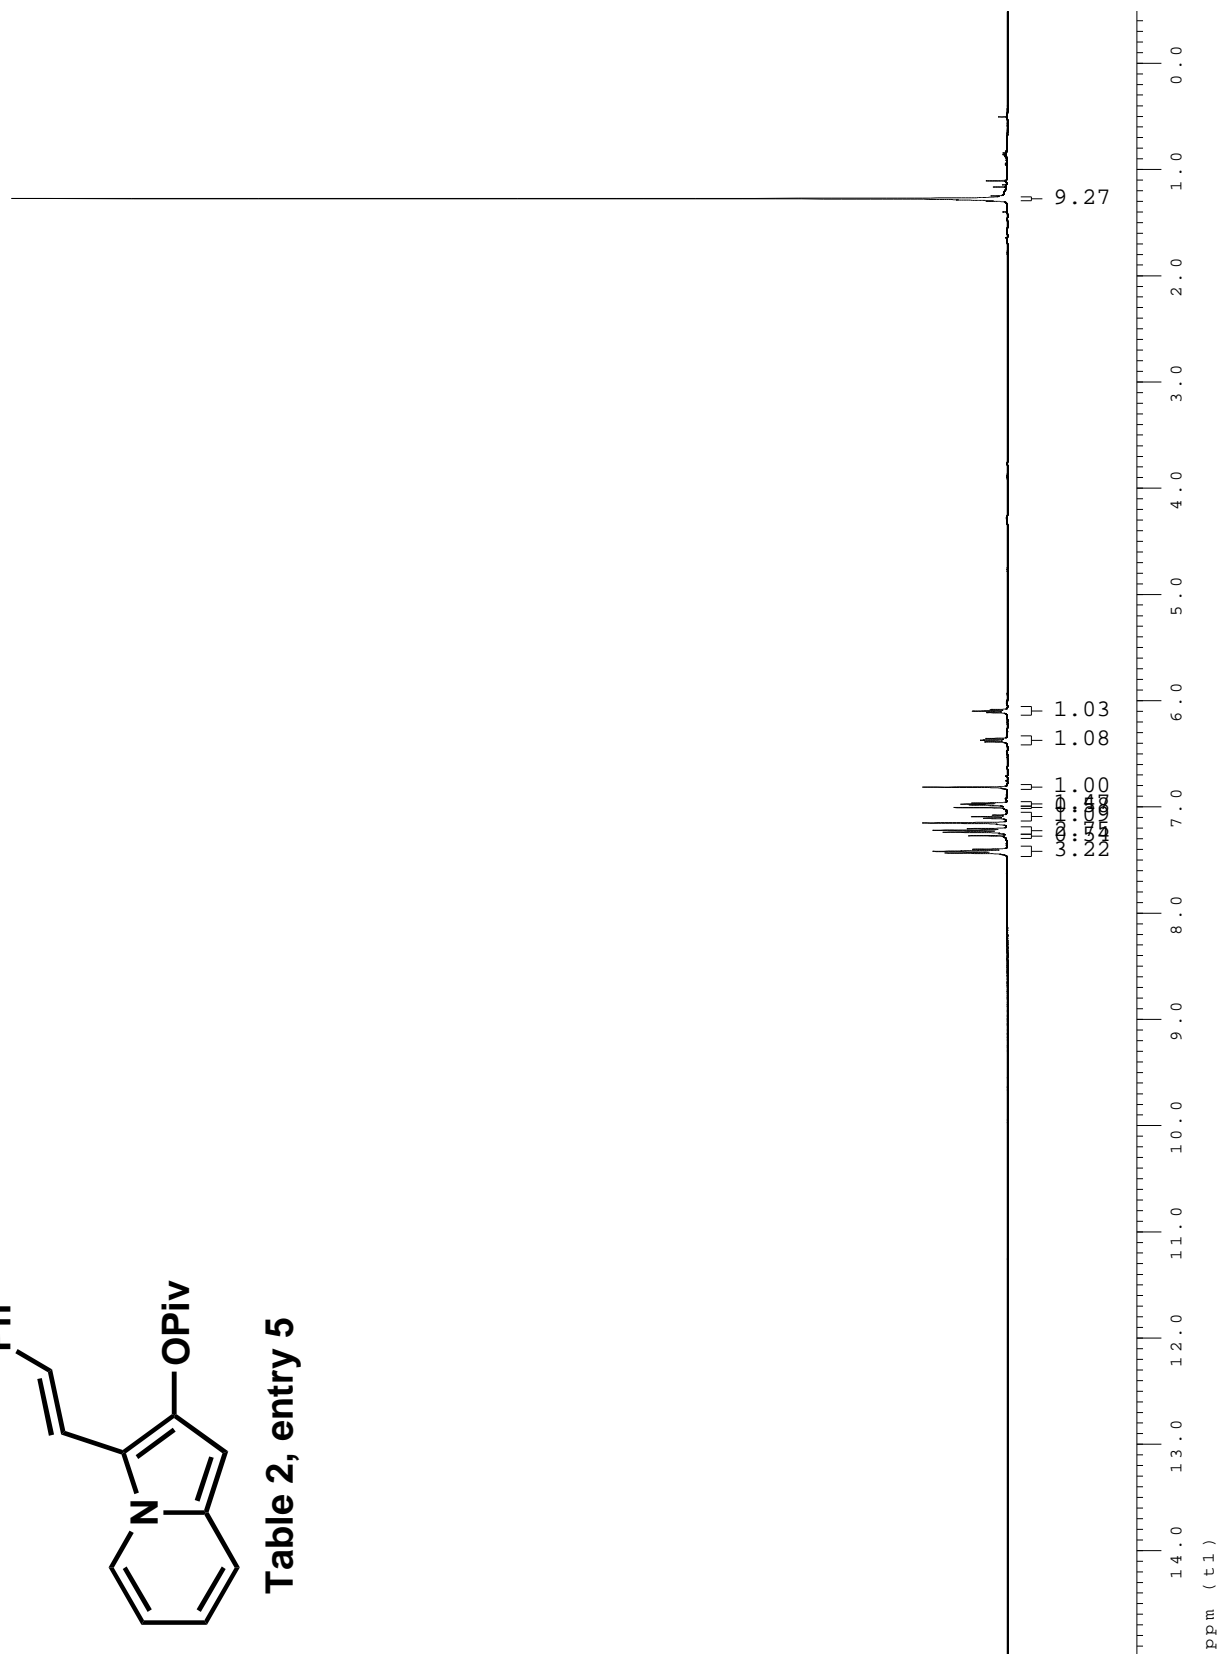

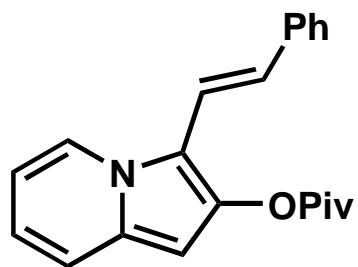

Table 2, entry 5

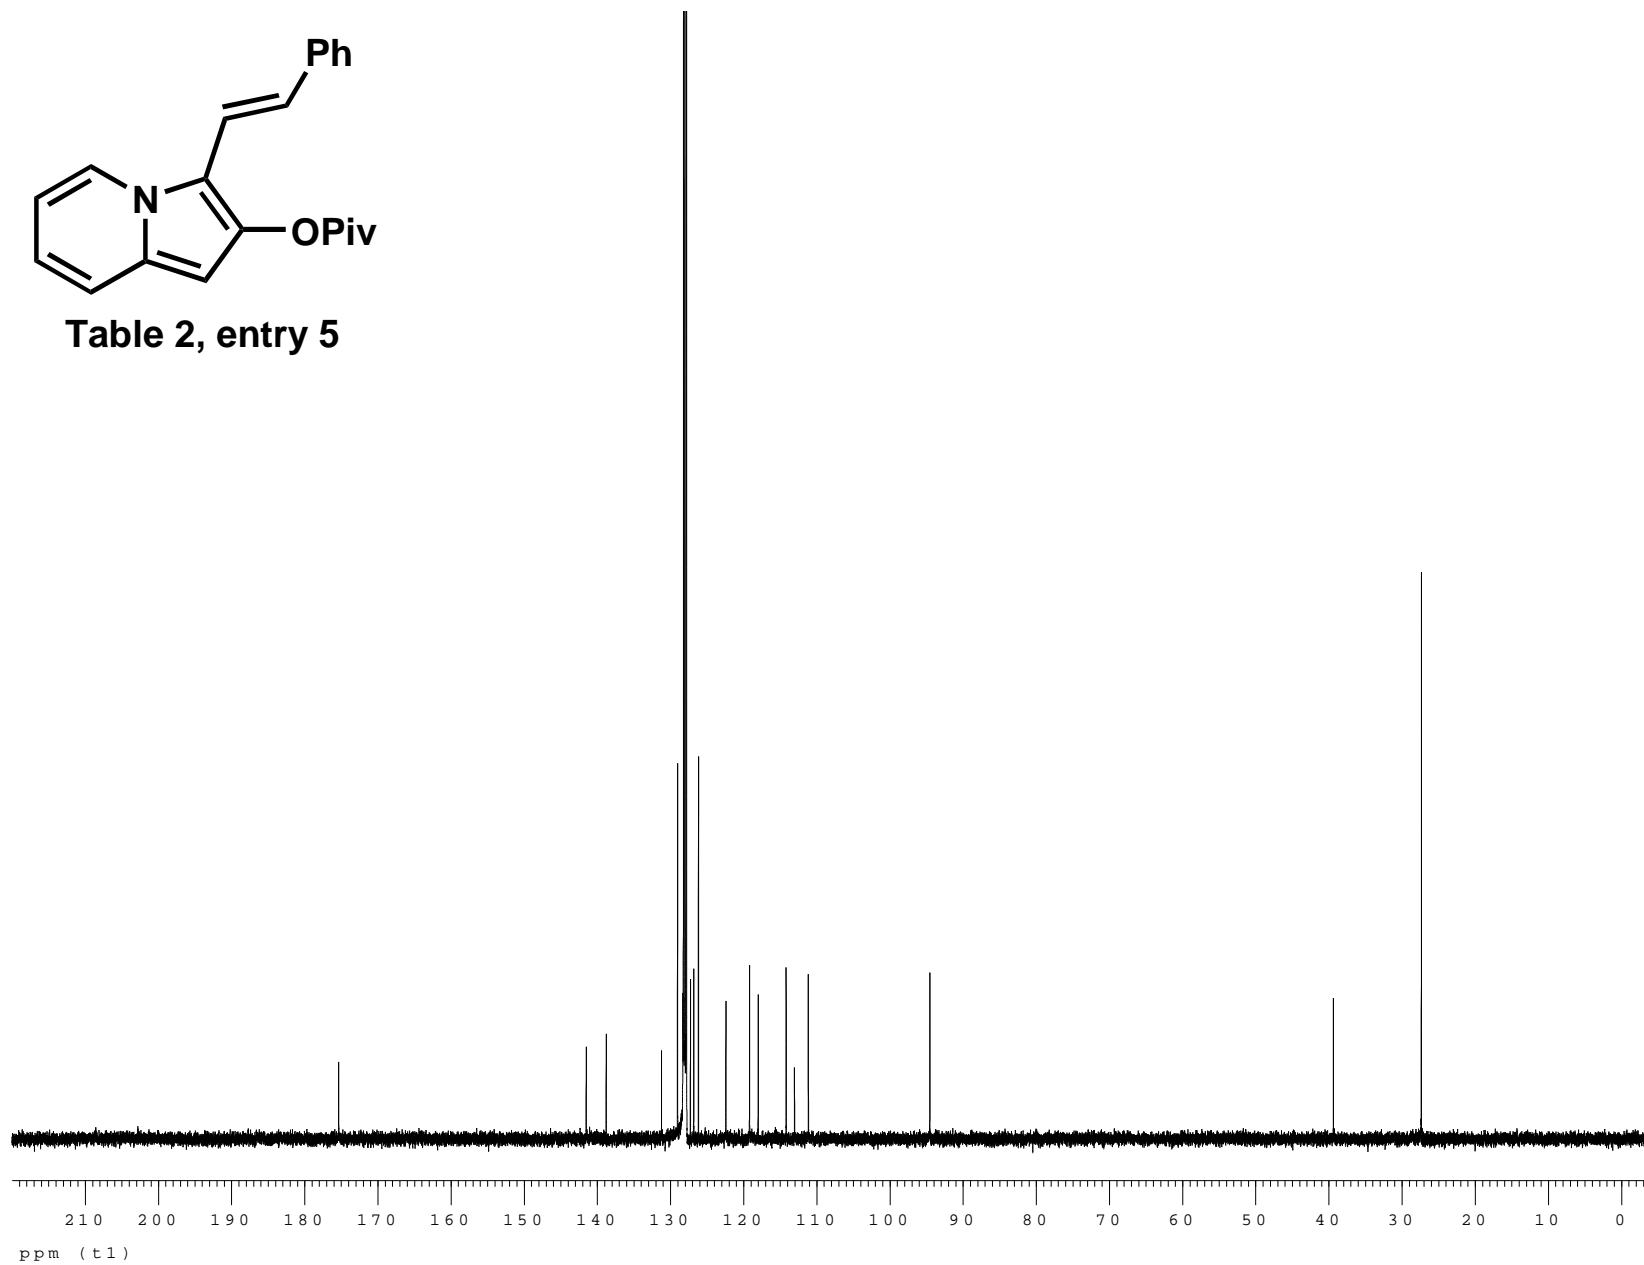

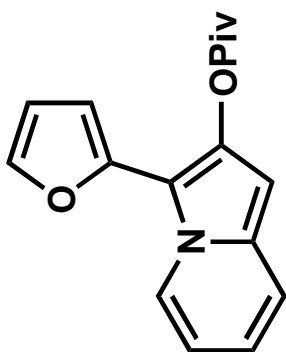

Table 2, entry 6

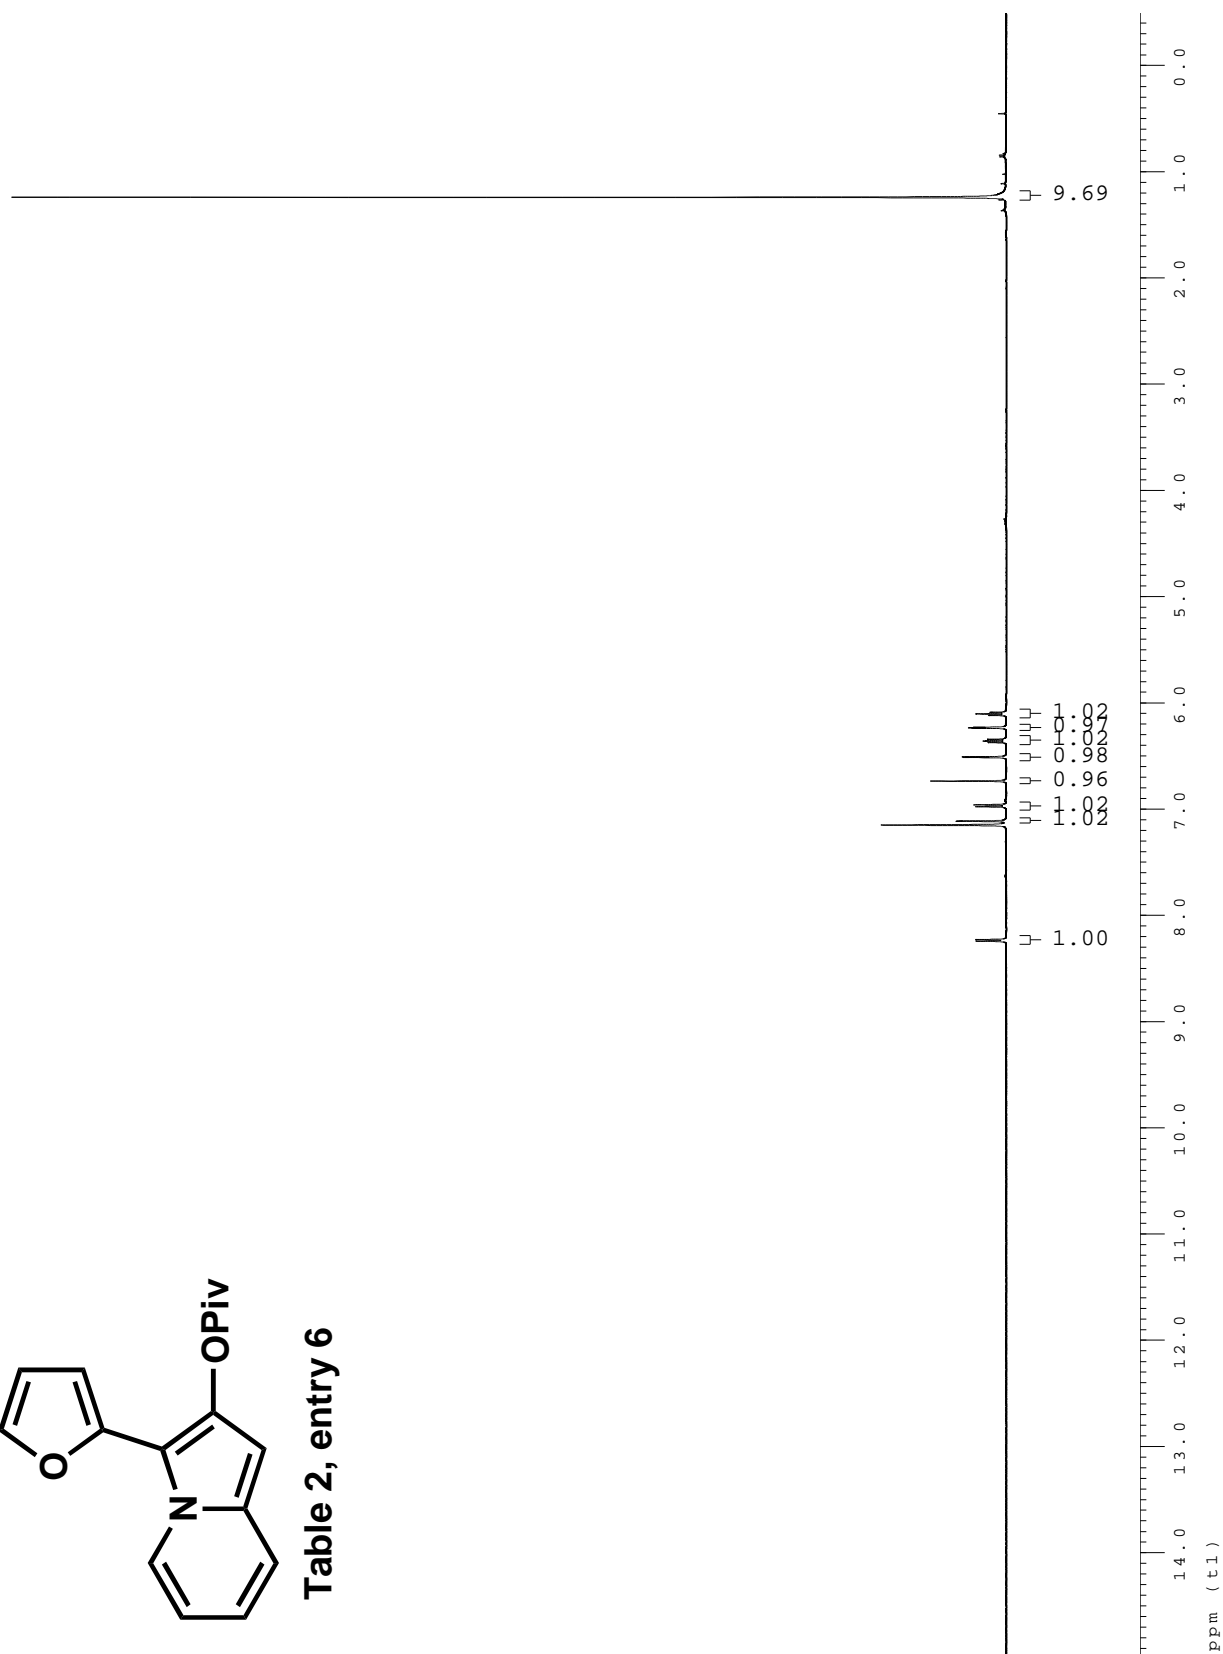

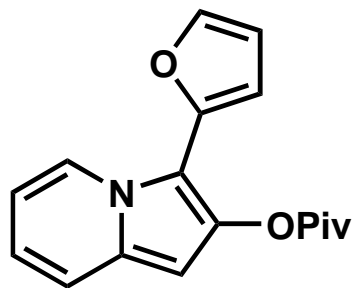

Table 2, entry 6

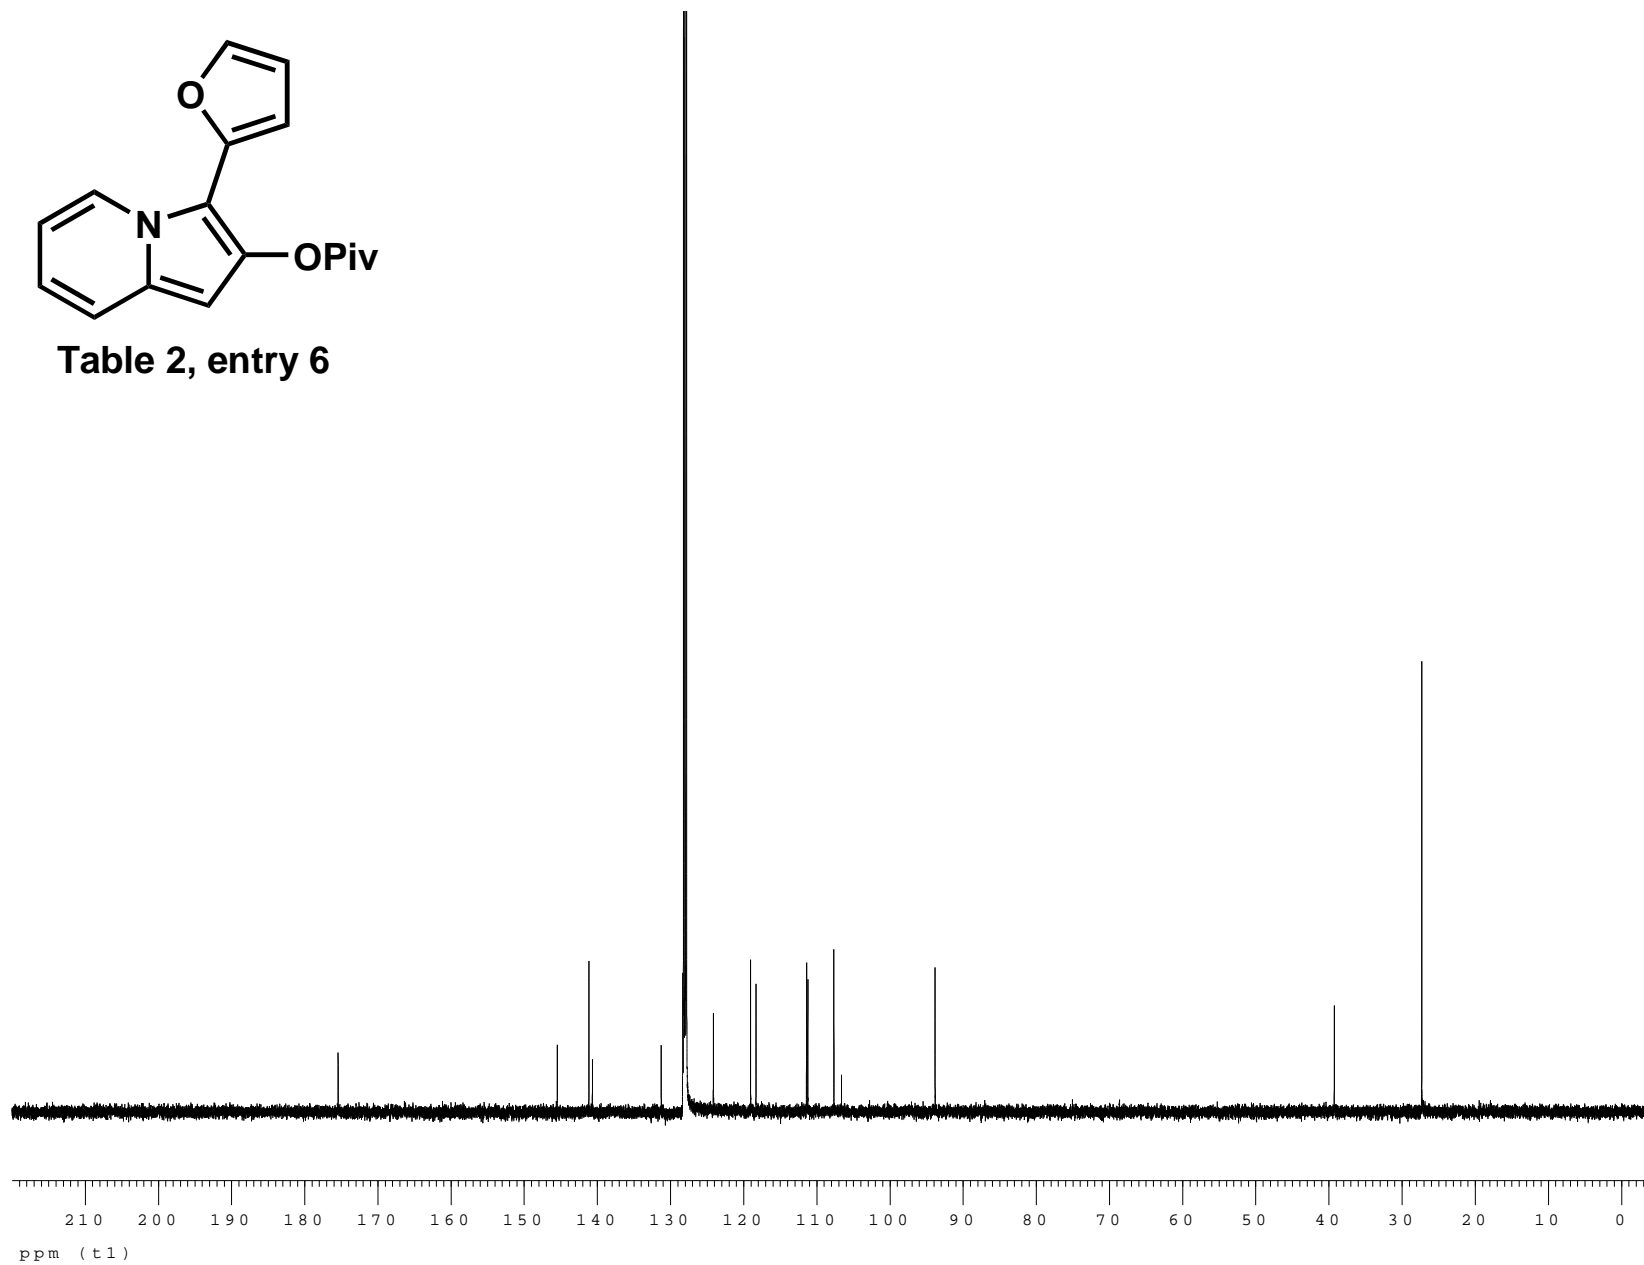

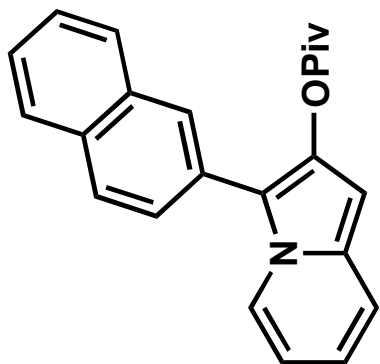

Table 2, entry 7

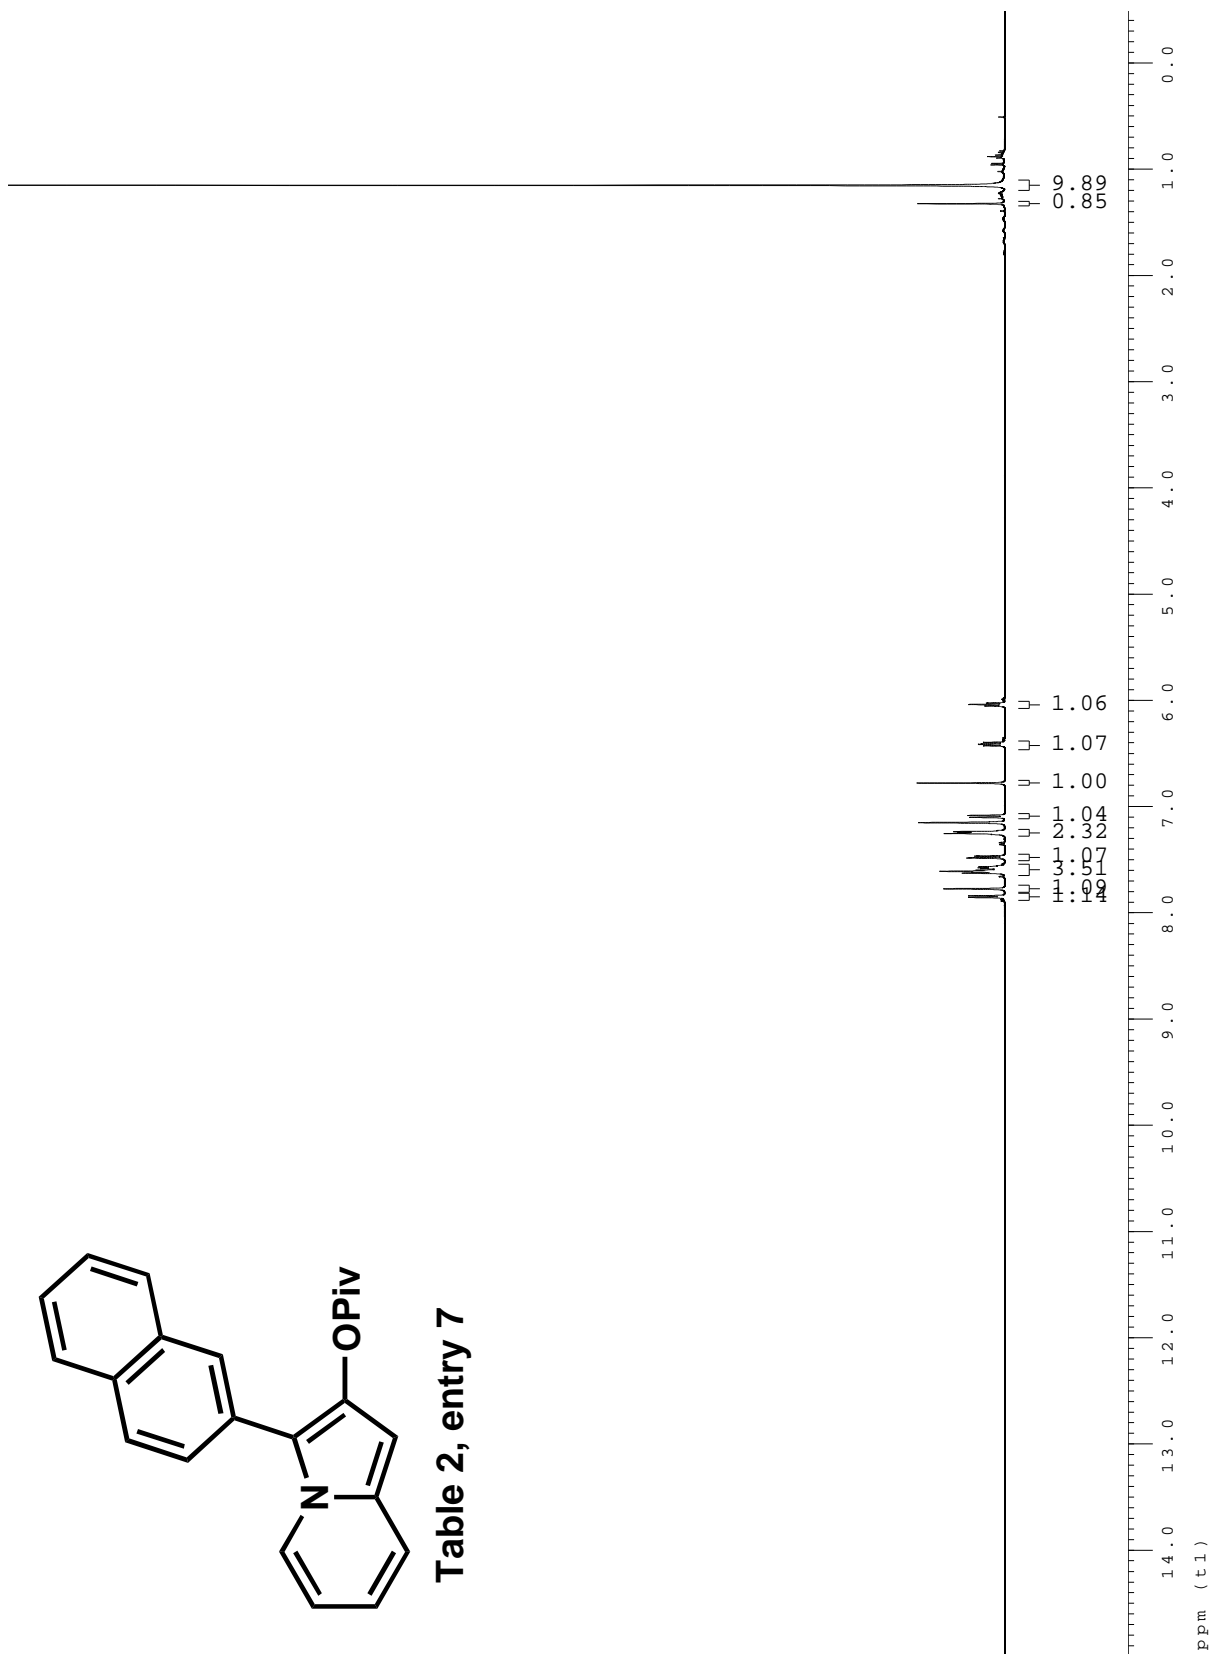



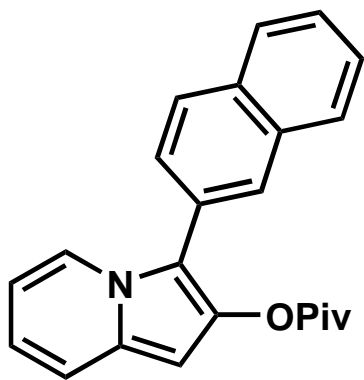

Table 2, entry 7

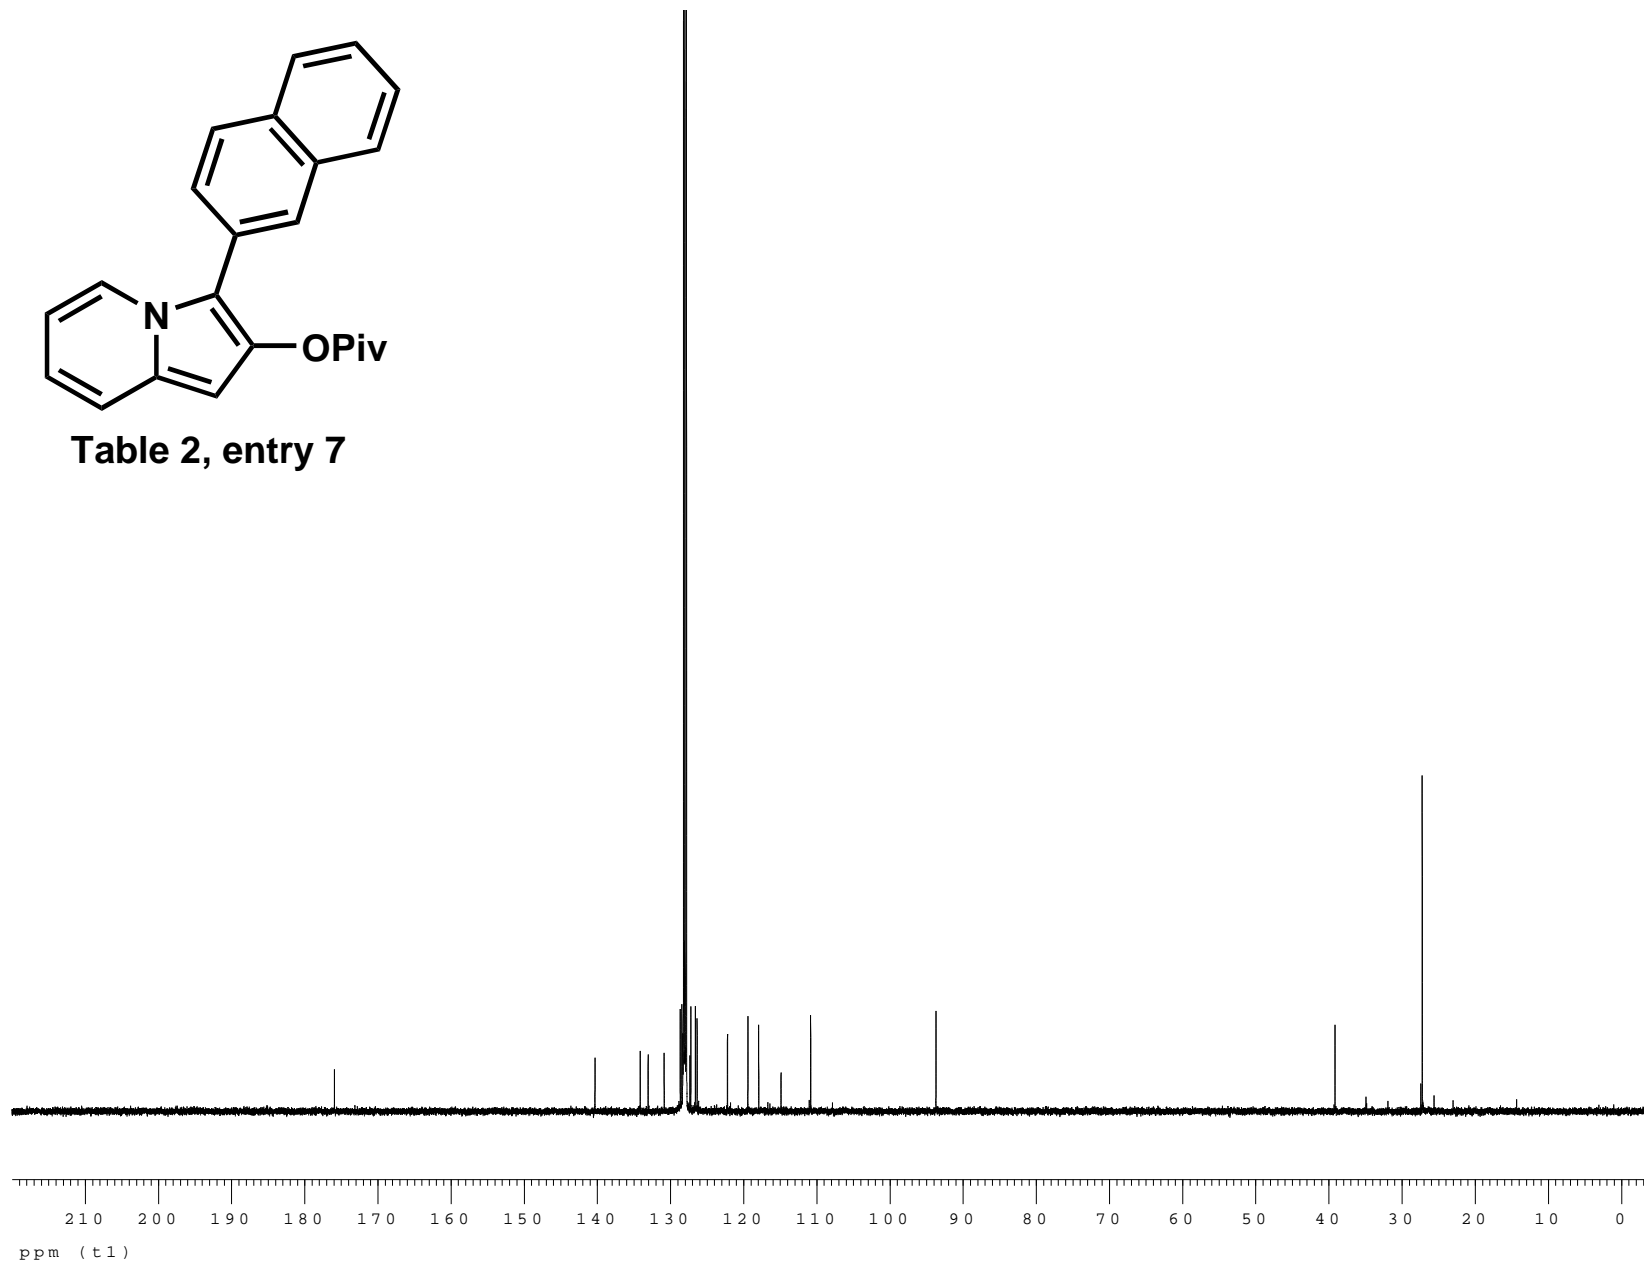

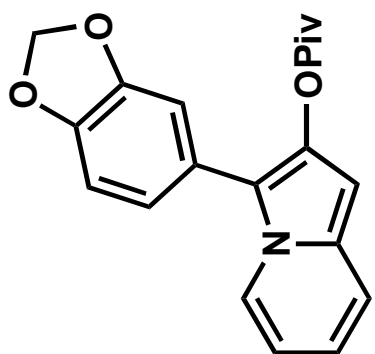

Table 2, entry 8

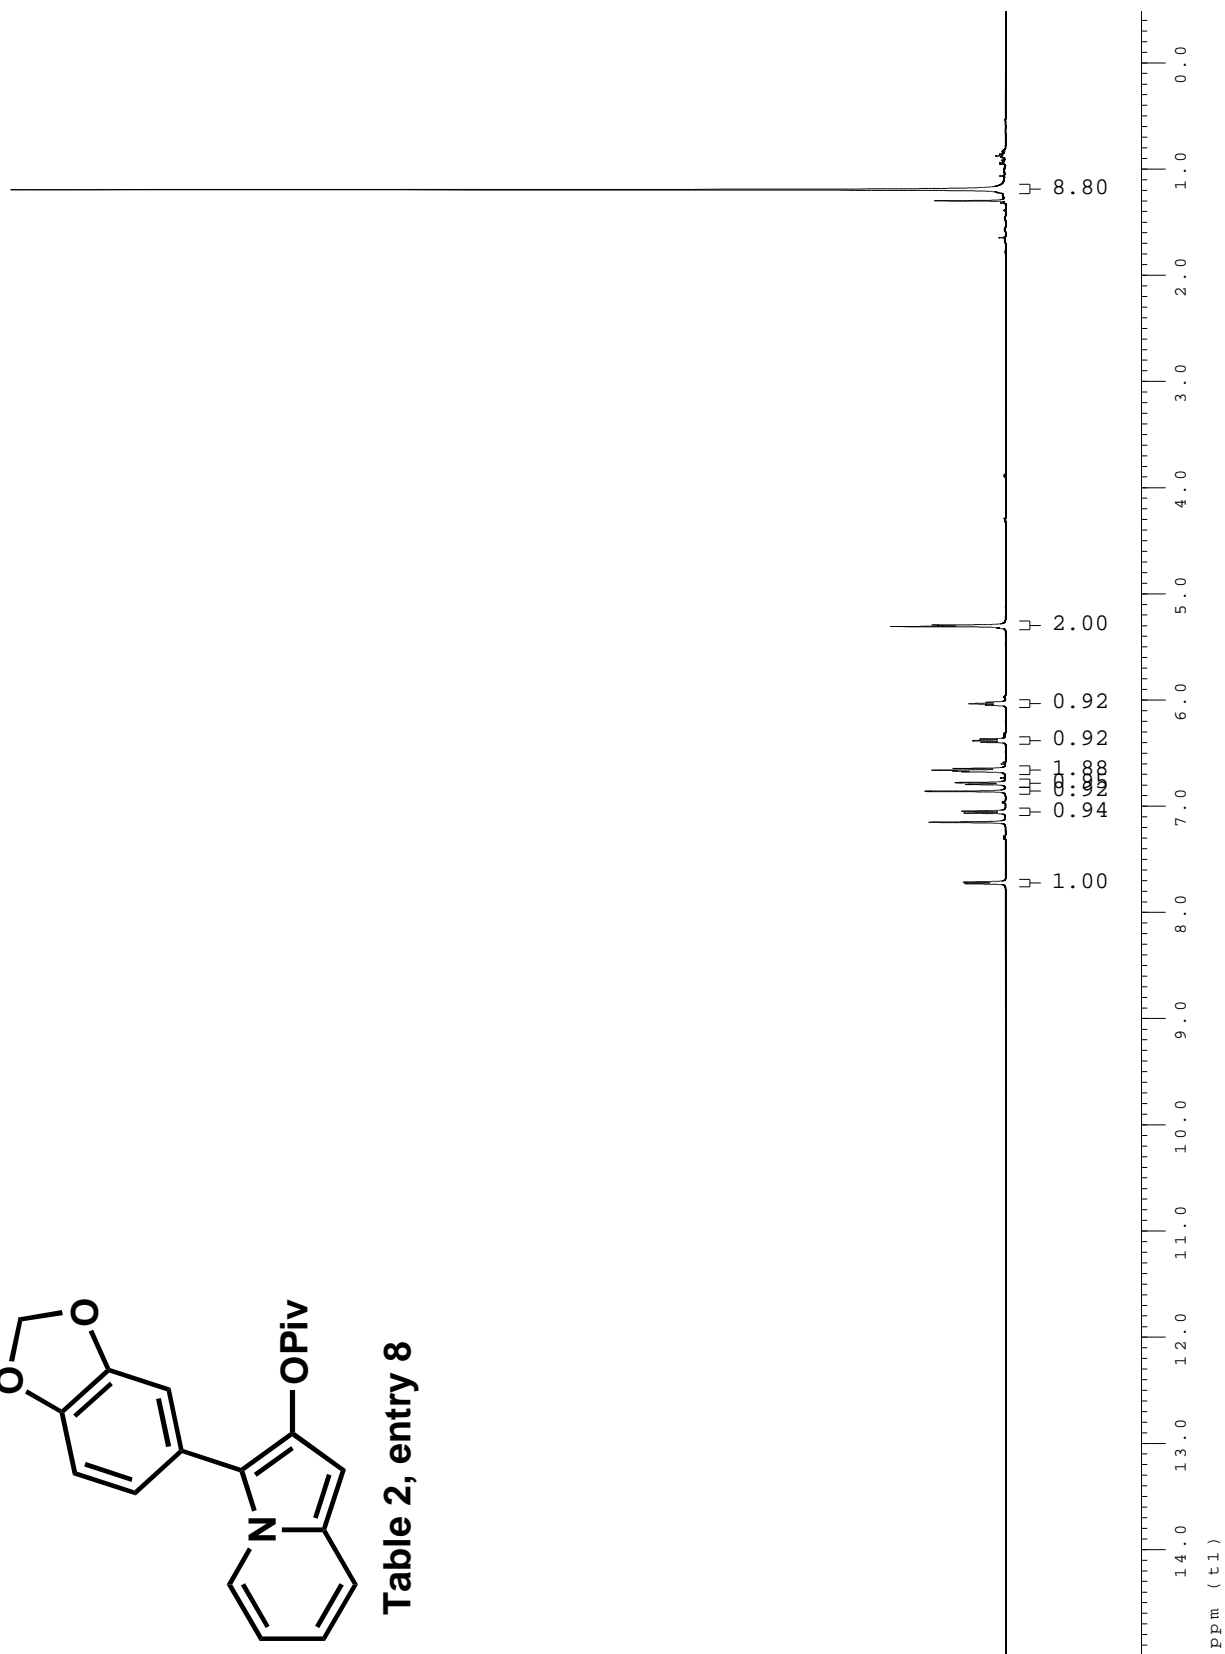

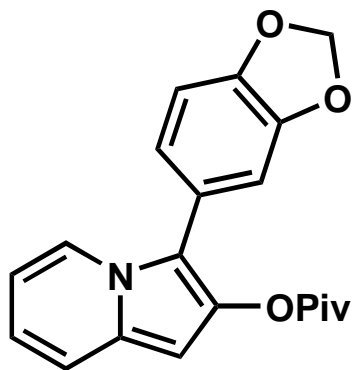

Table 2, entry 8

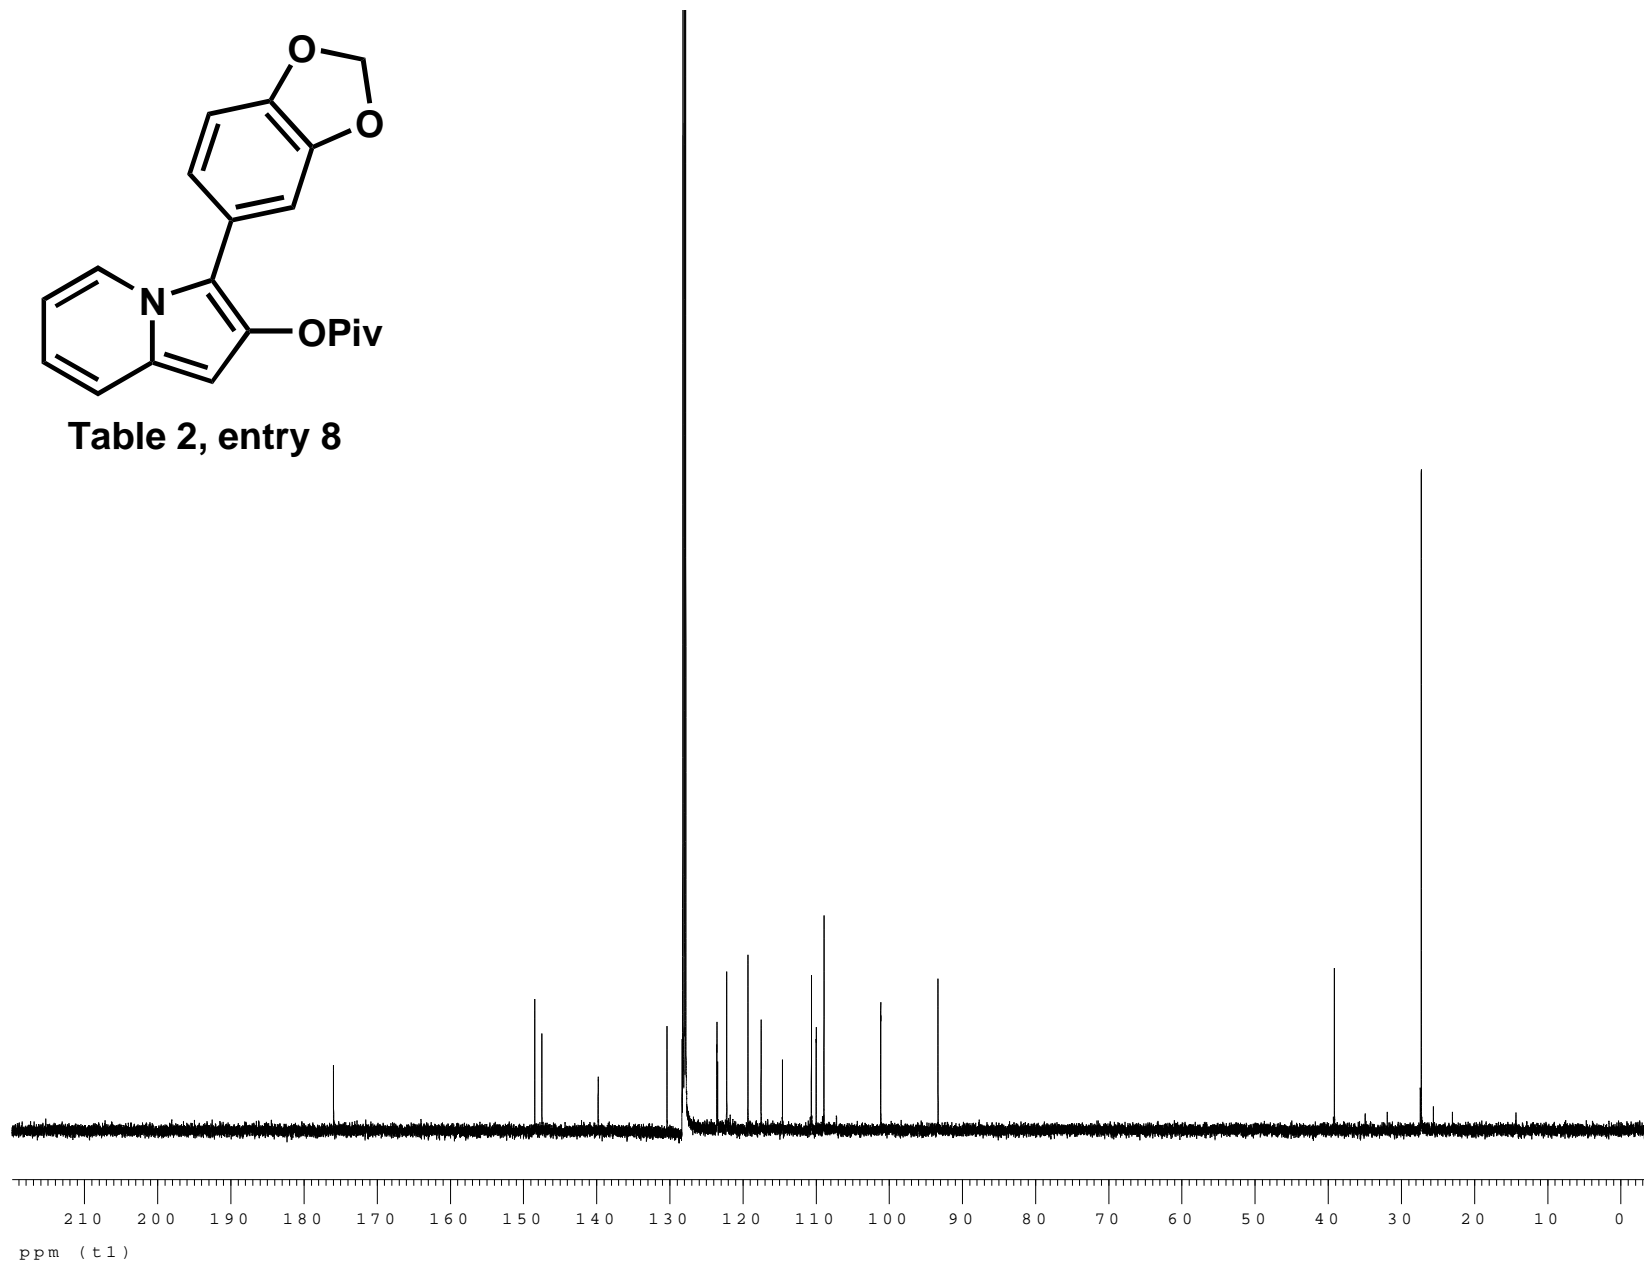

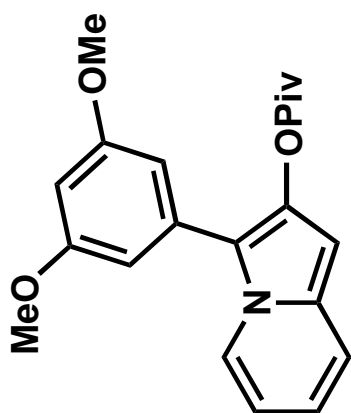

Table 2, entry 9

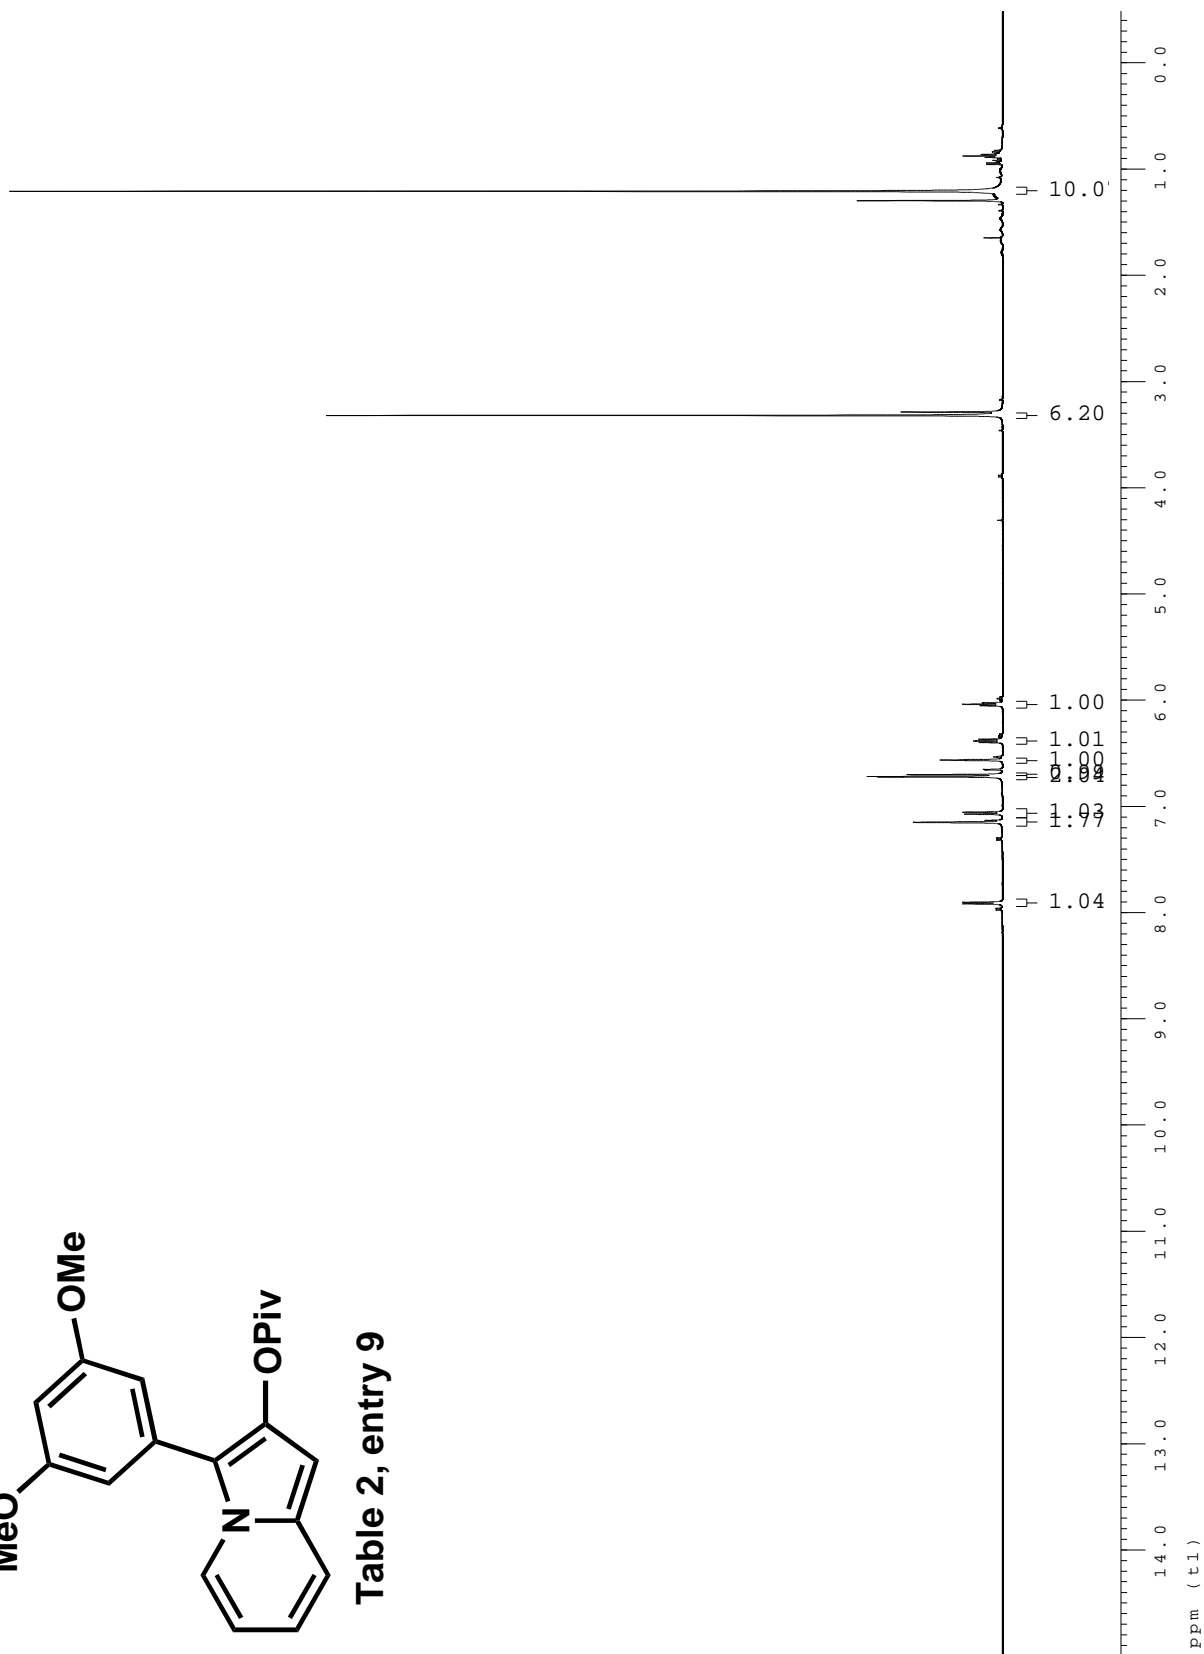

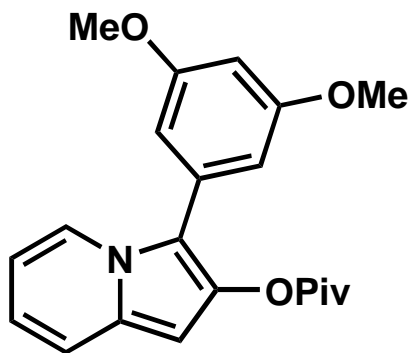

Table 2, entry 9

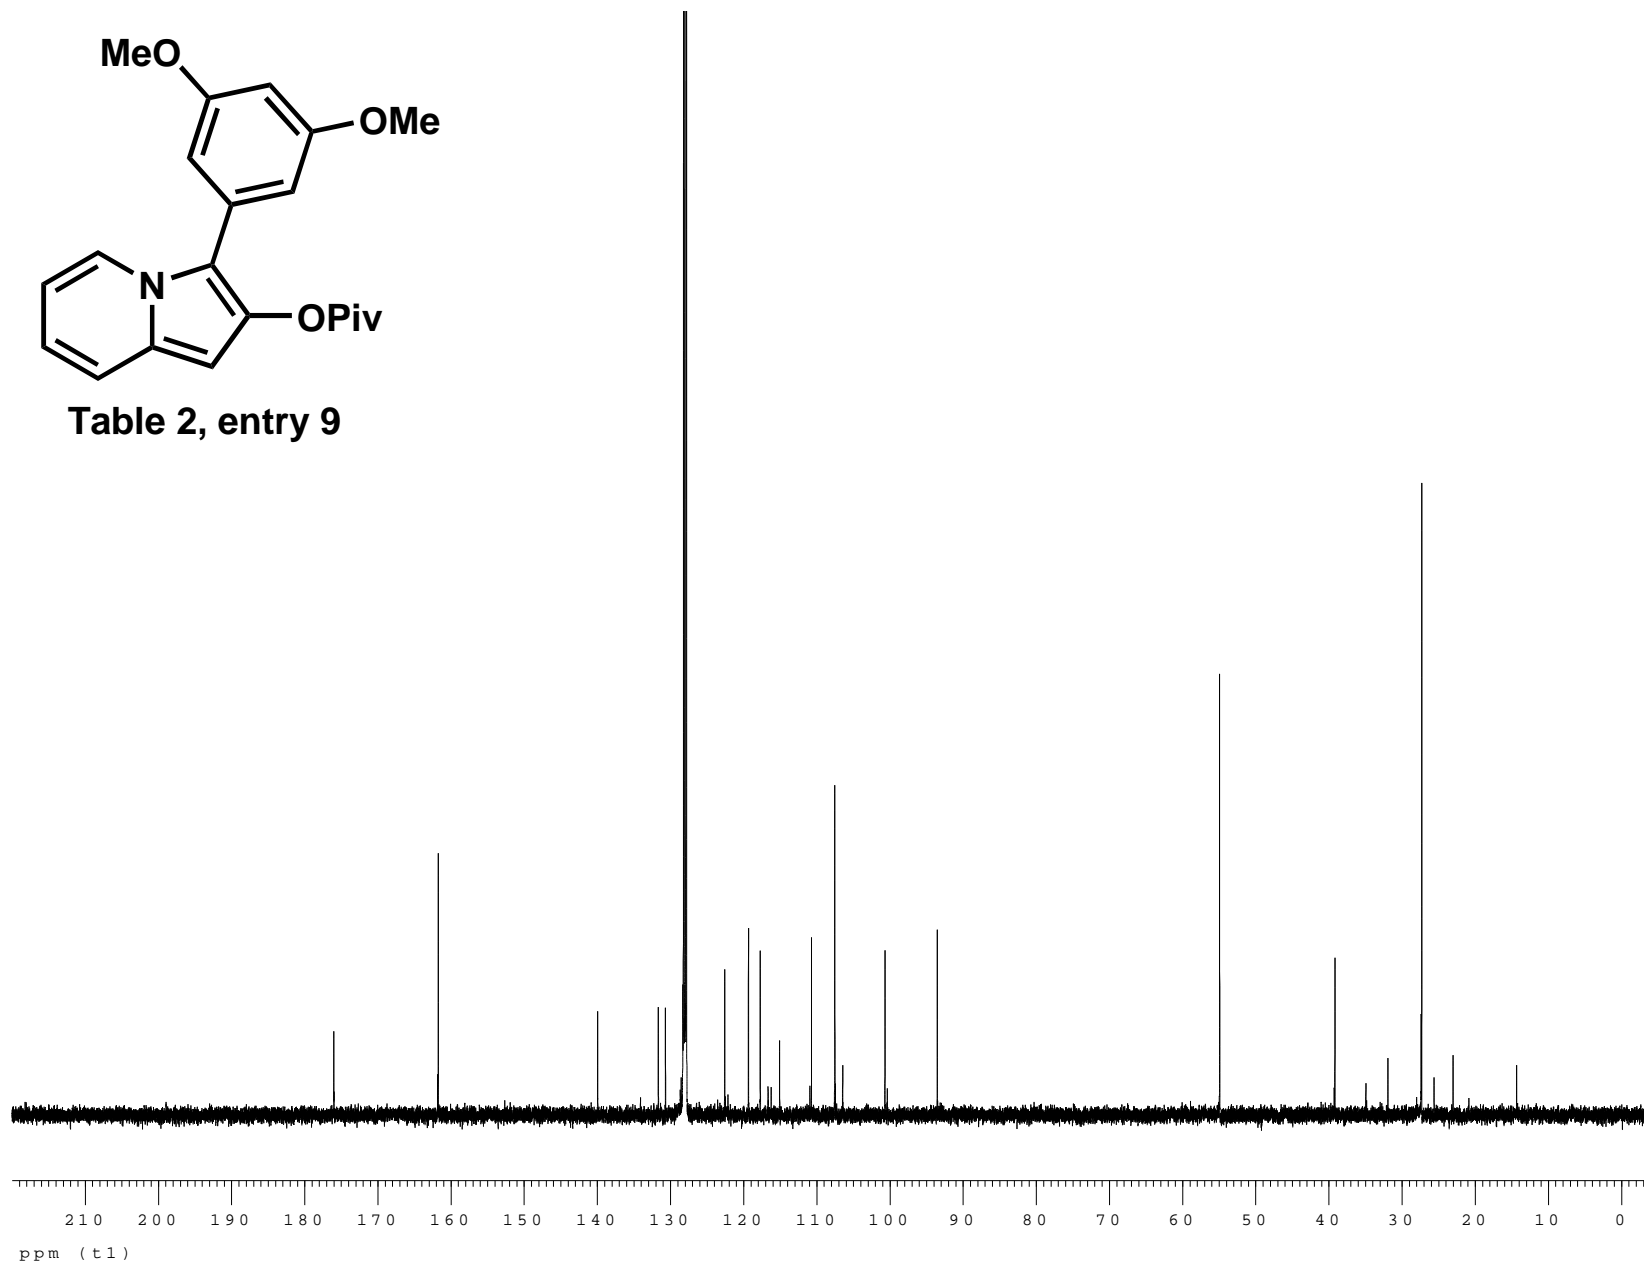

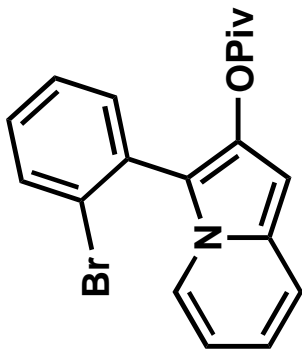

Table 2, entry 10

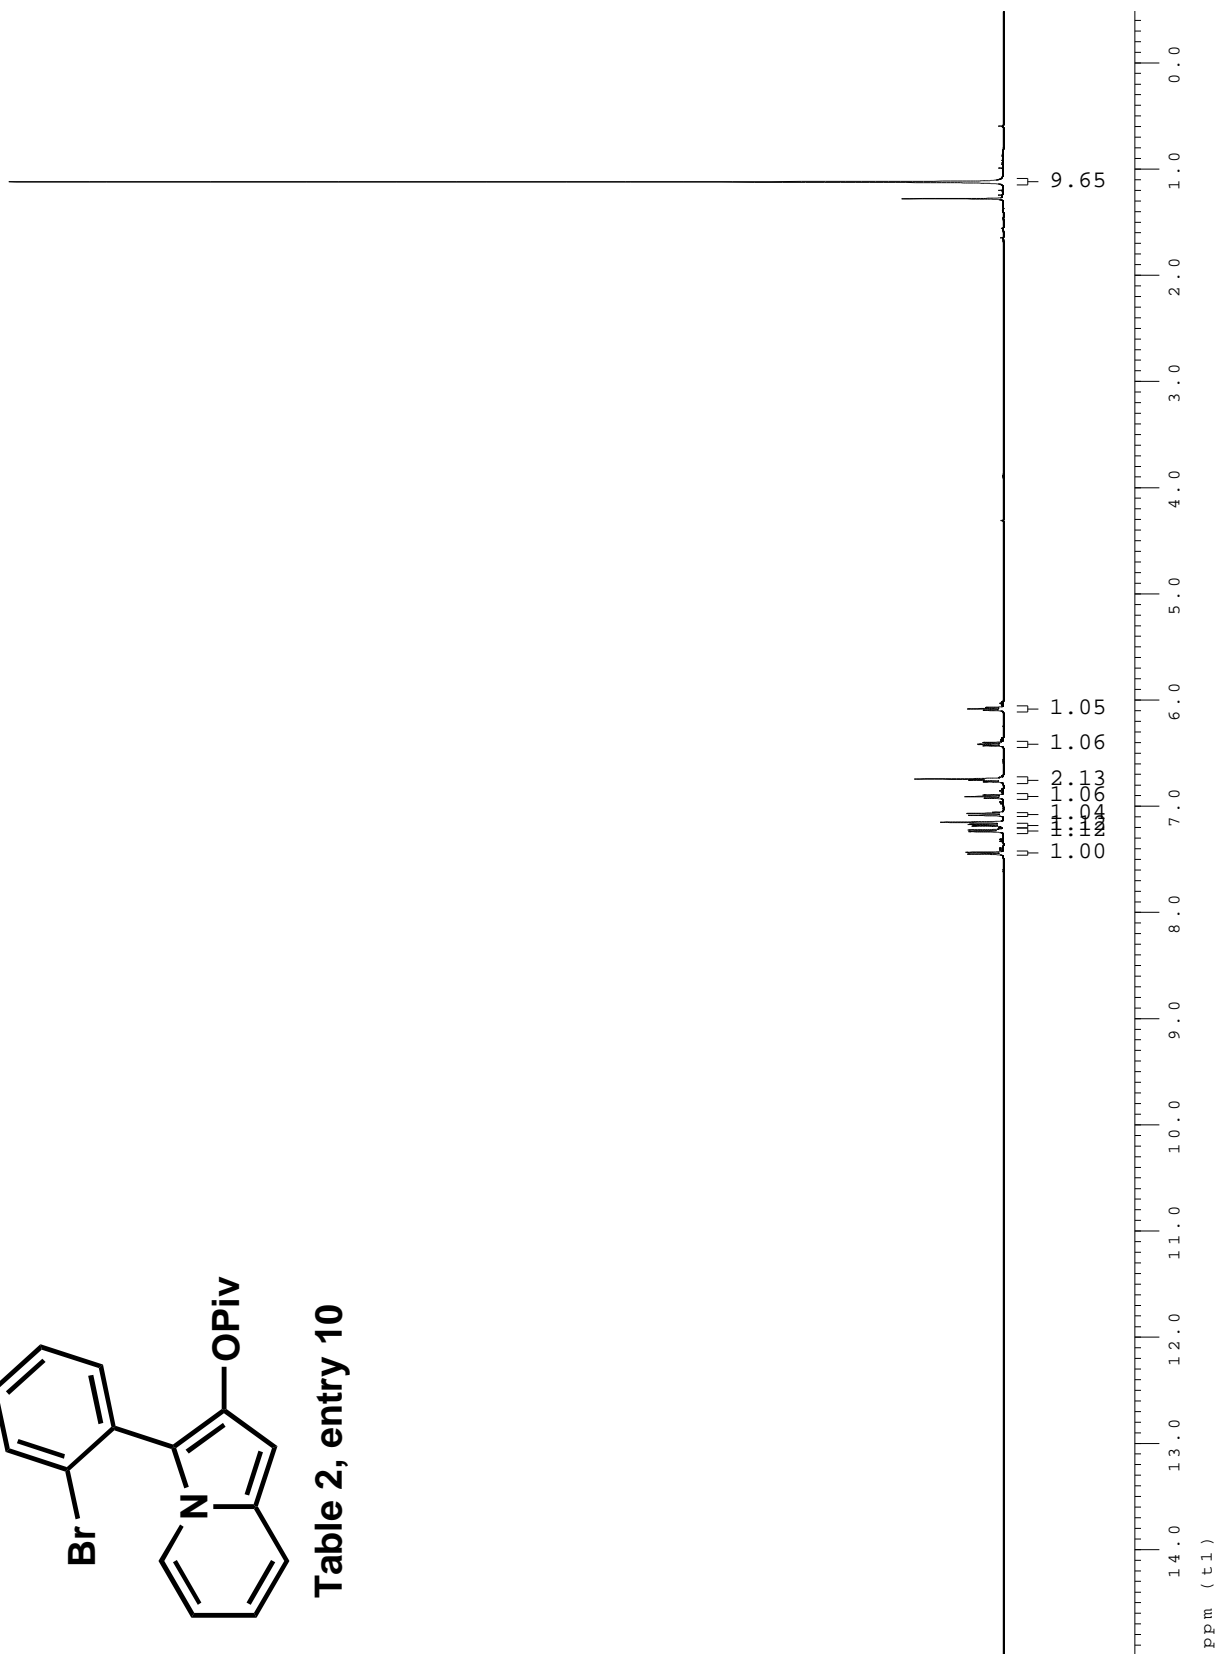

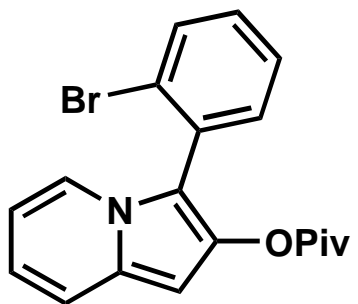

Table 2, entry 10

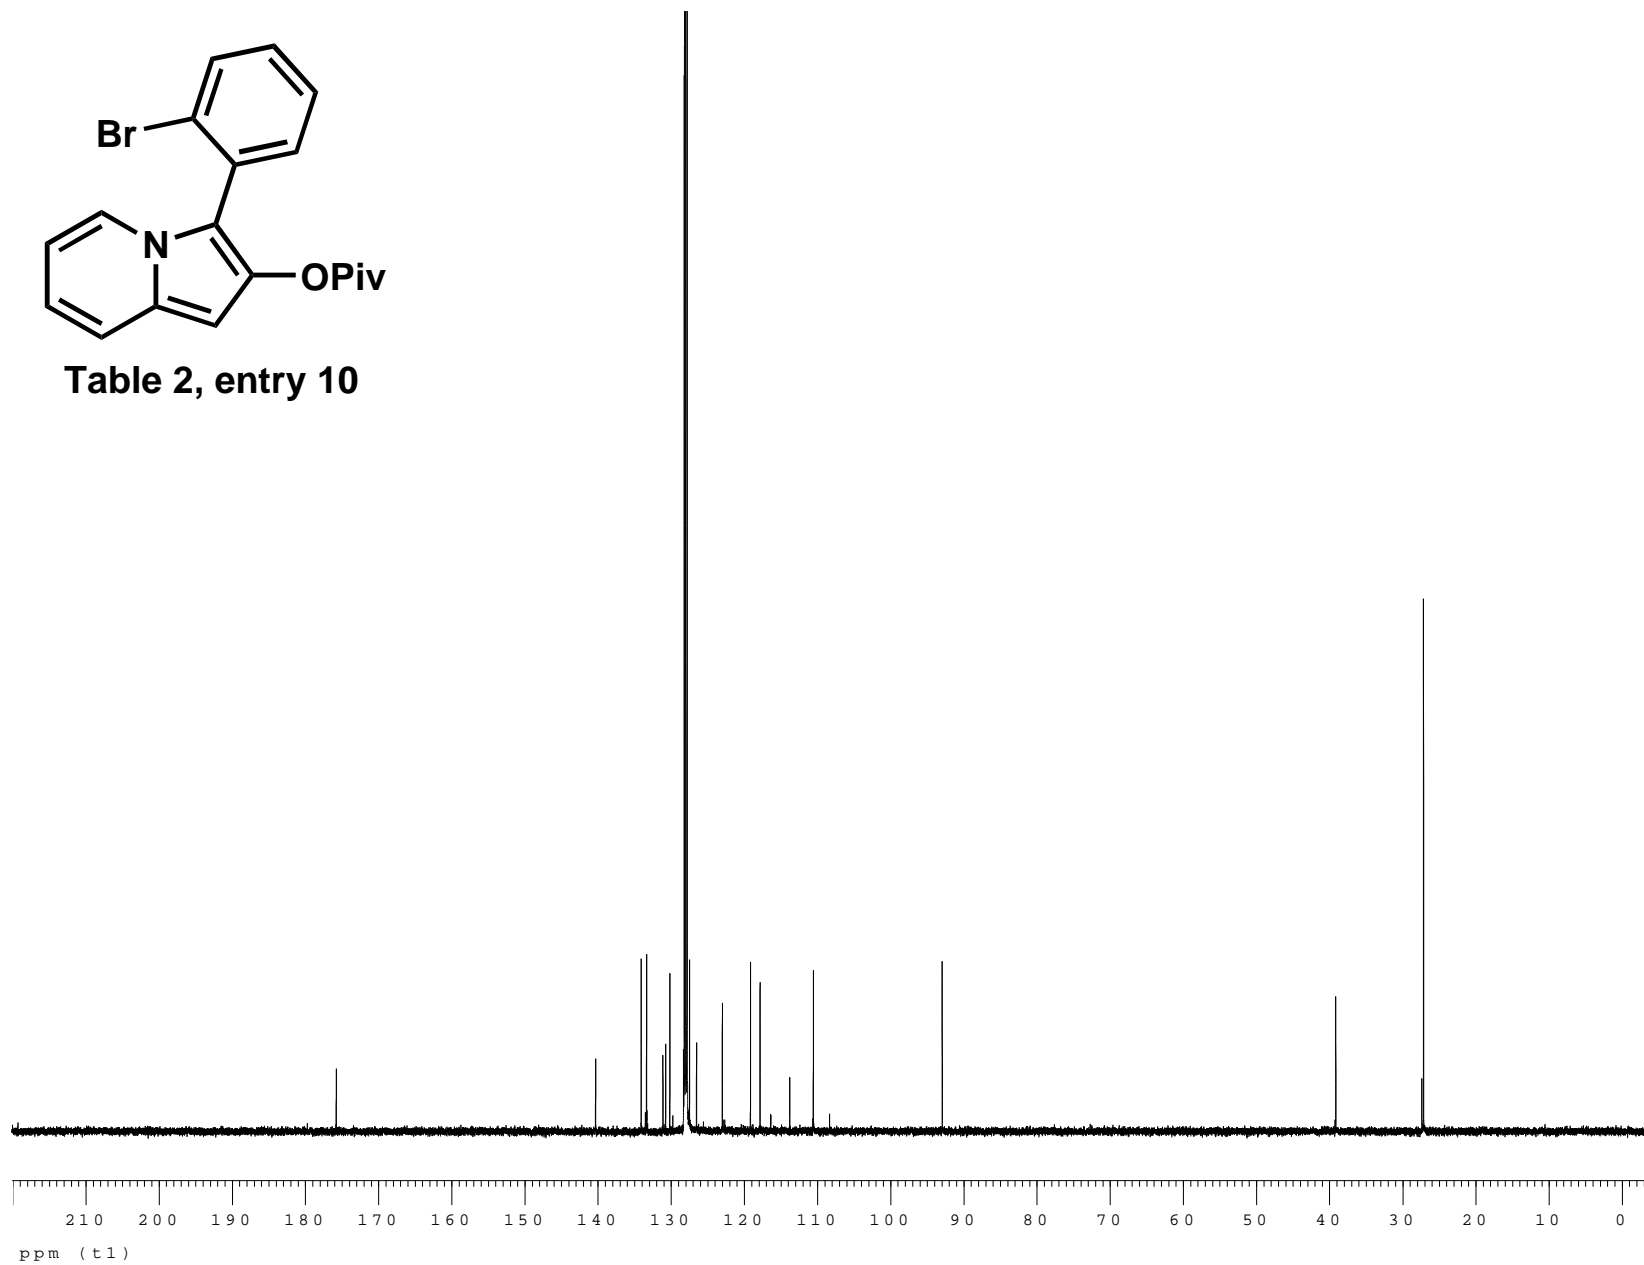

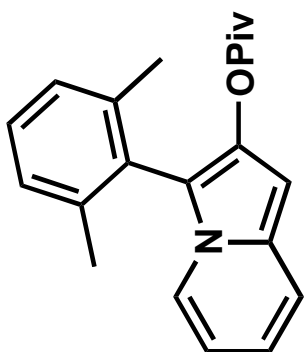

Table 2, entry 11

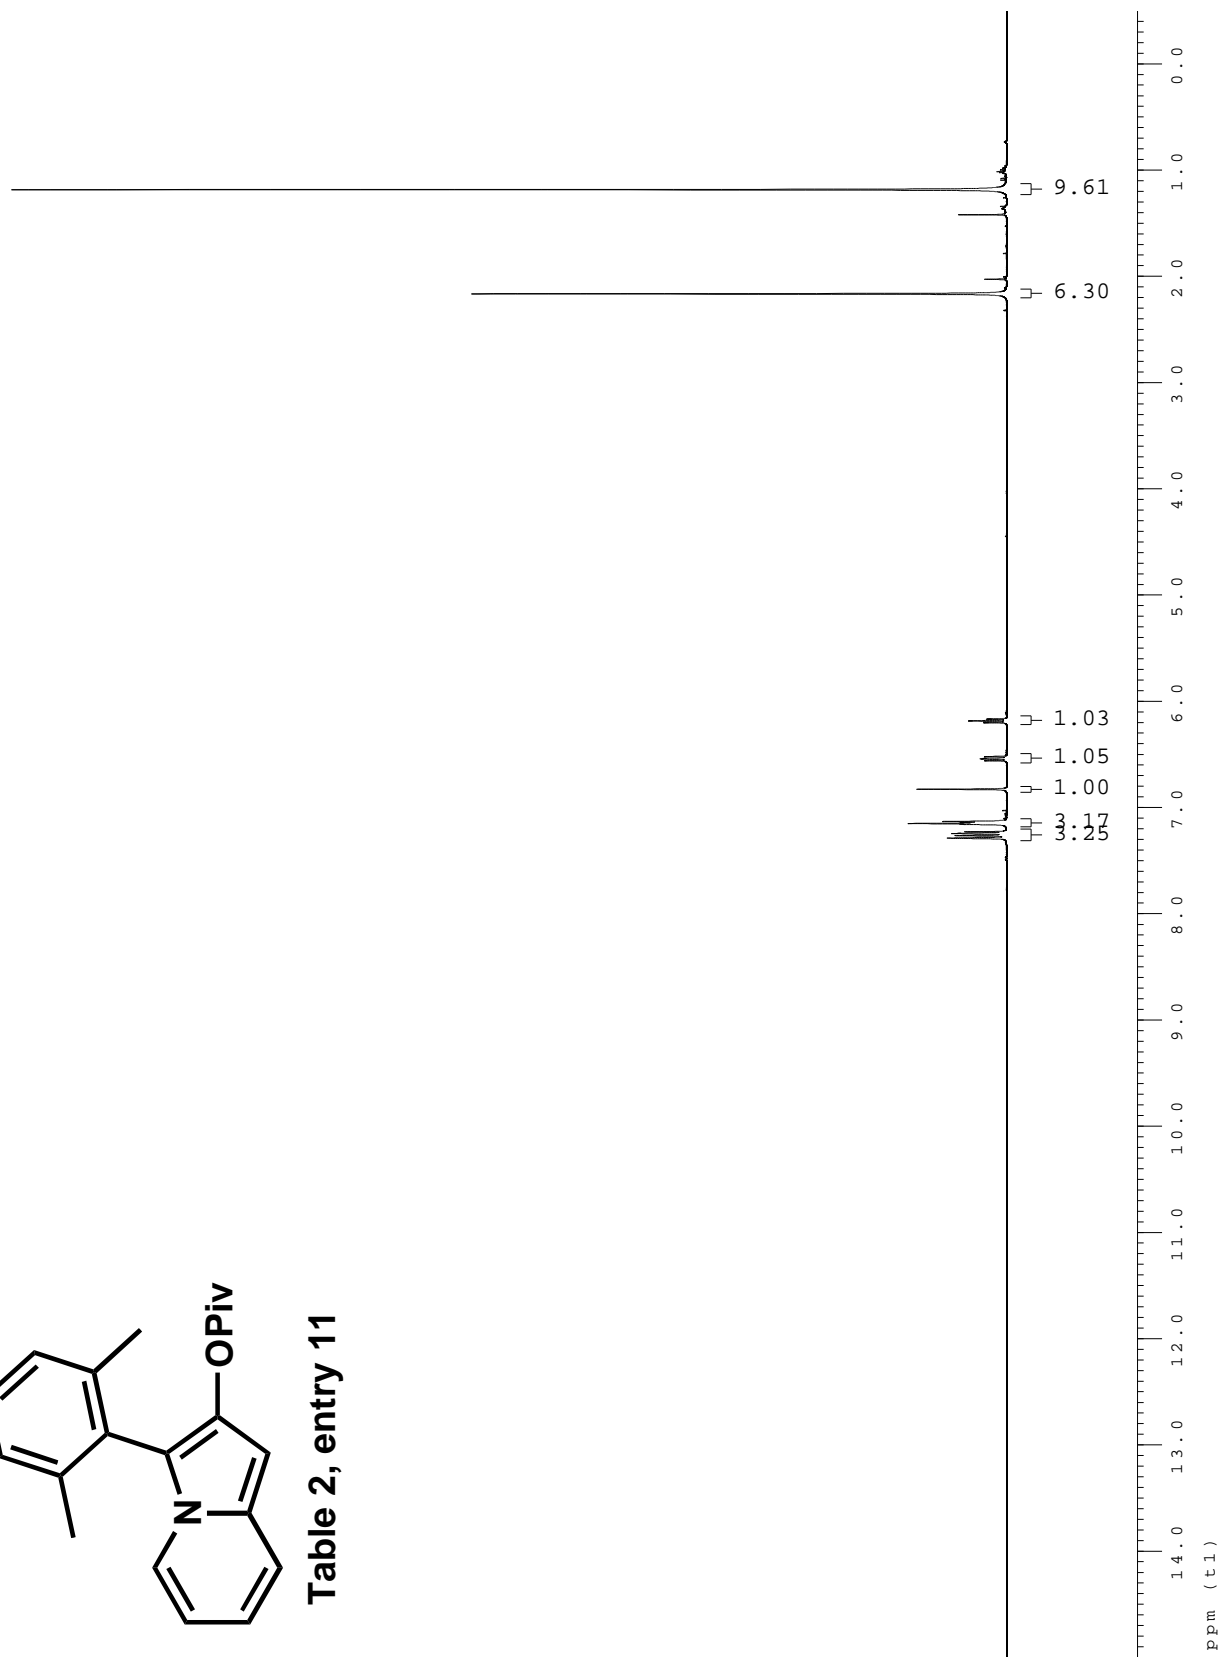



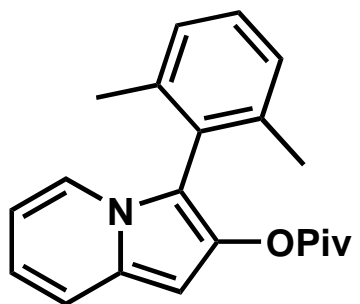

Table 2, entry 11

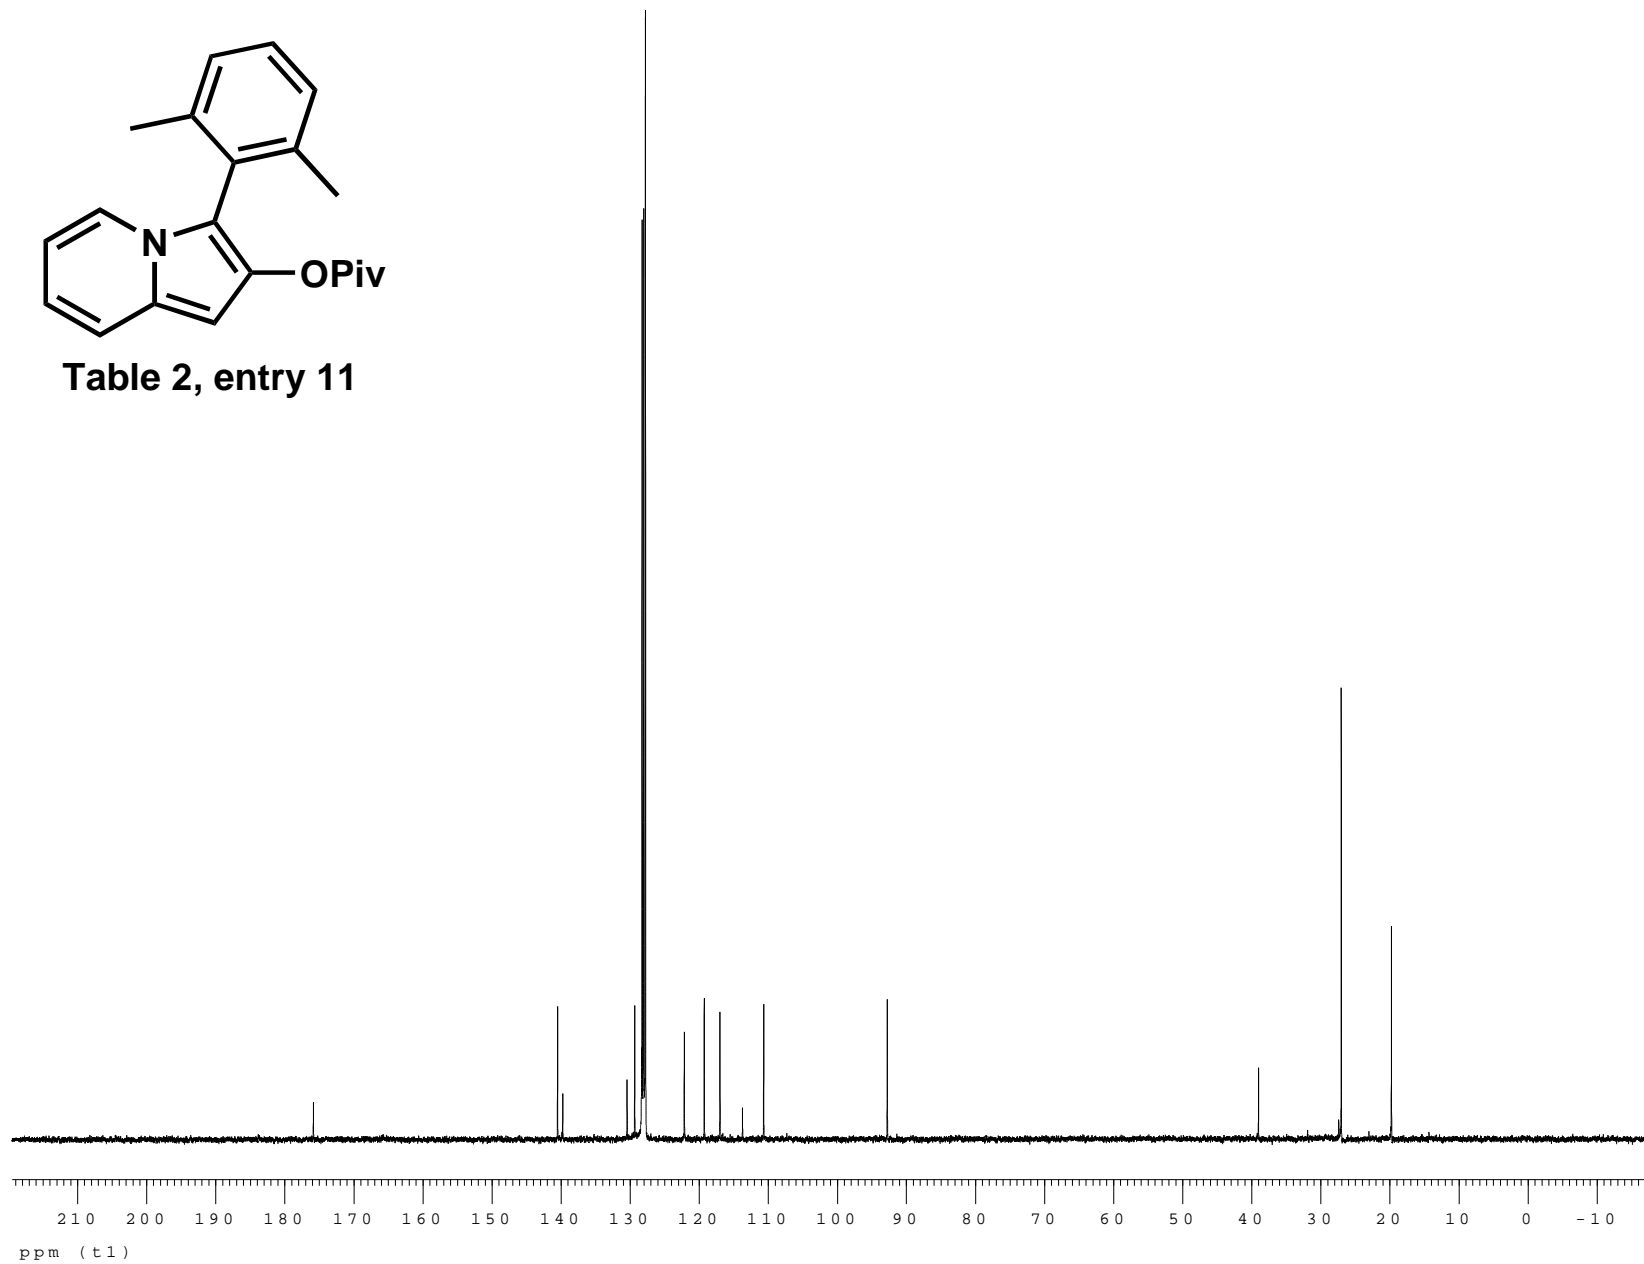

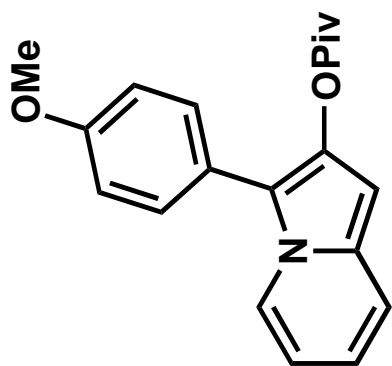

Table 2, entry 12b

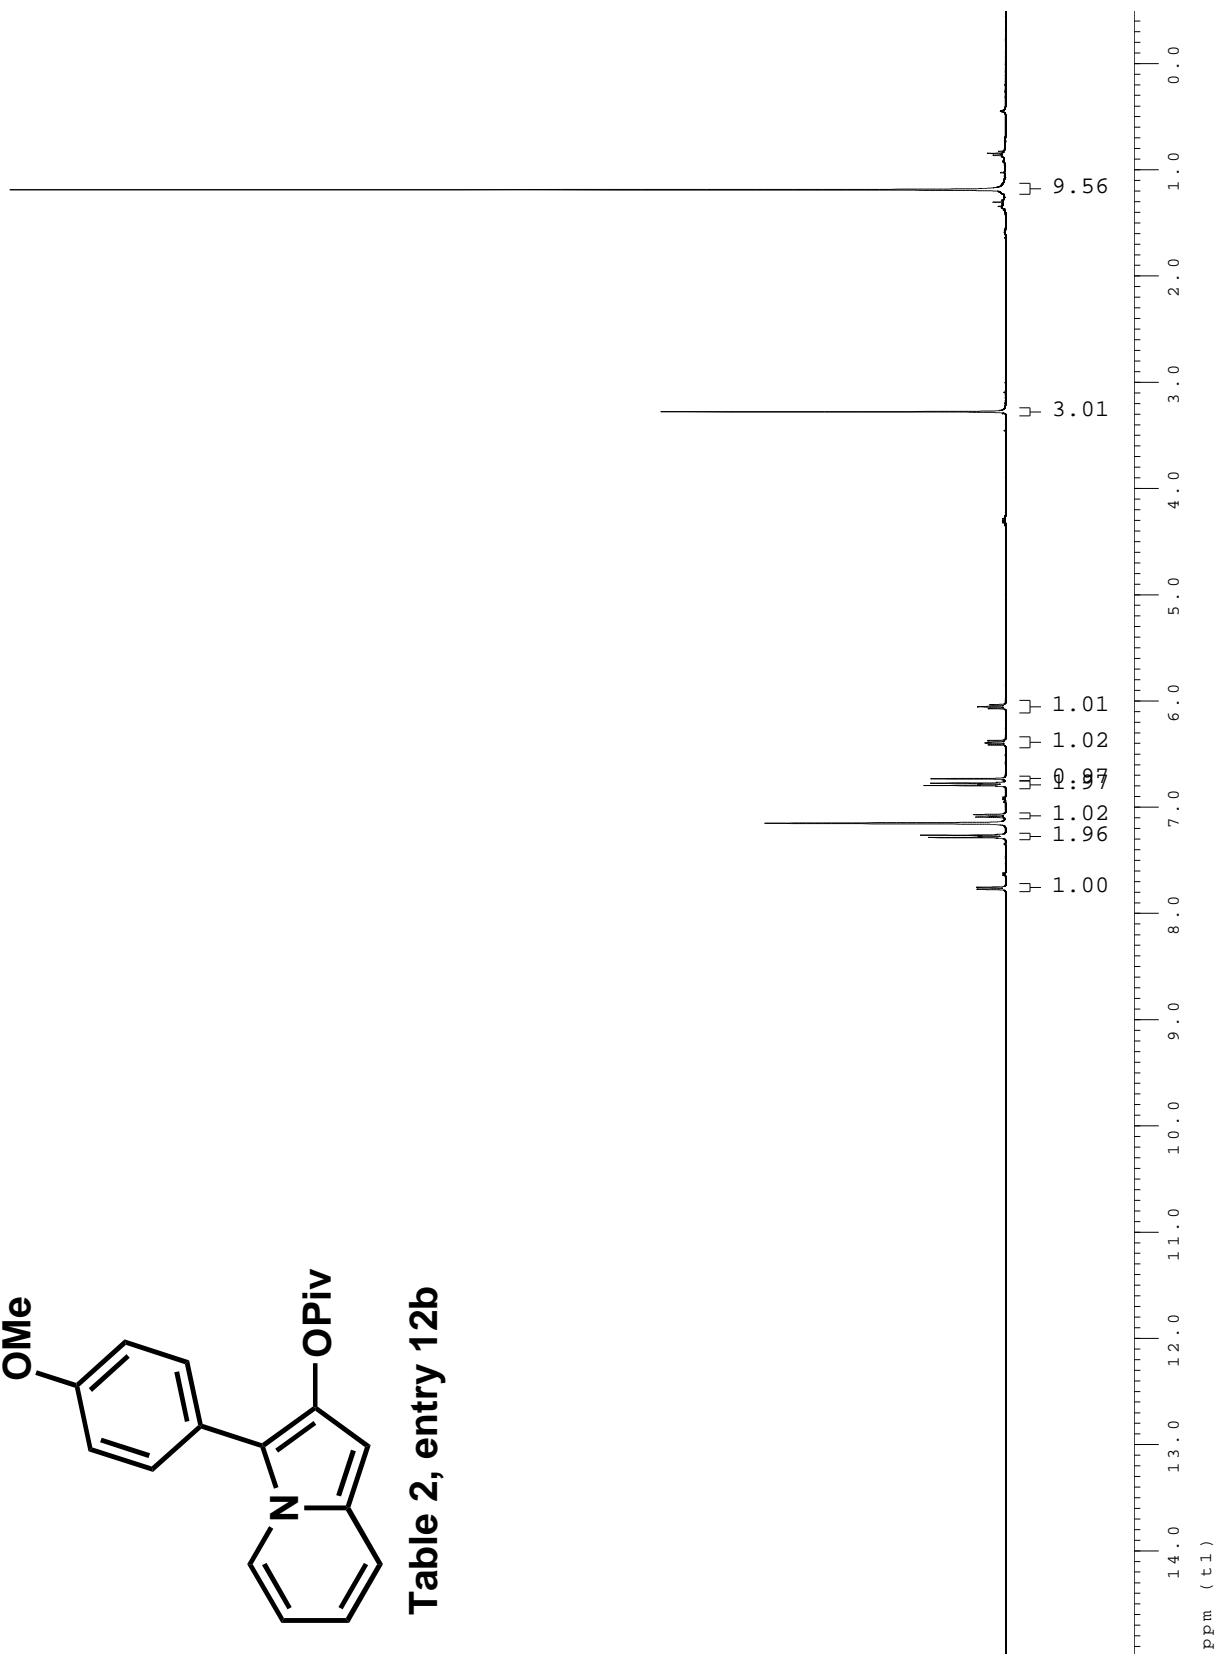

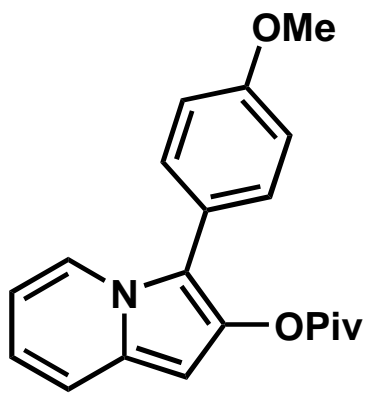

Table 2, entry 12b

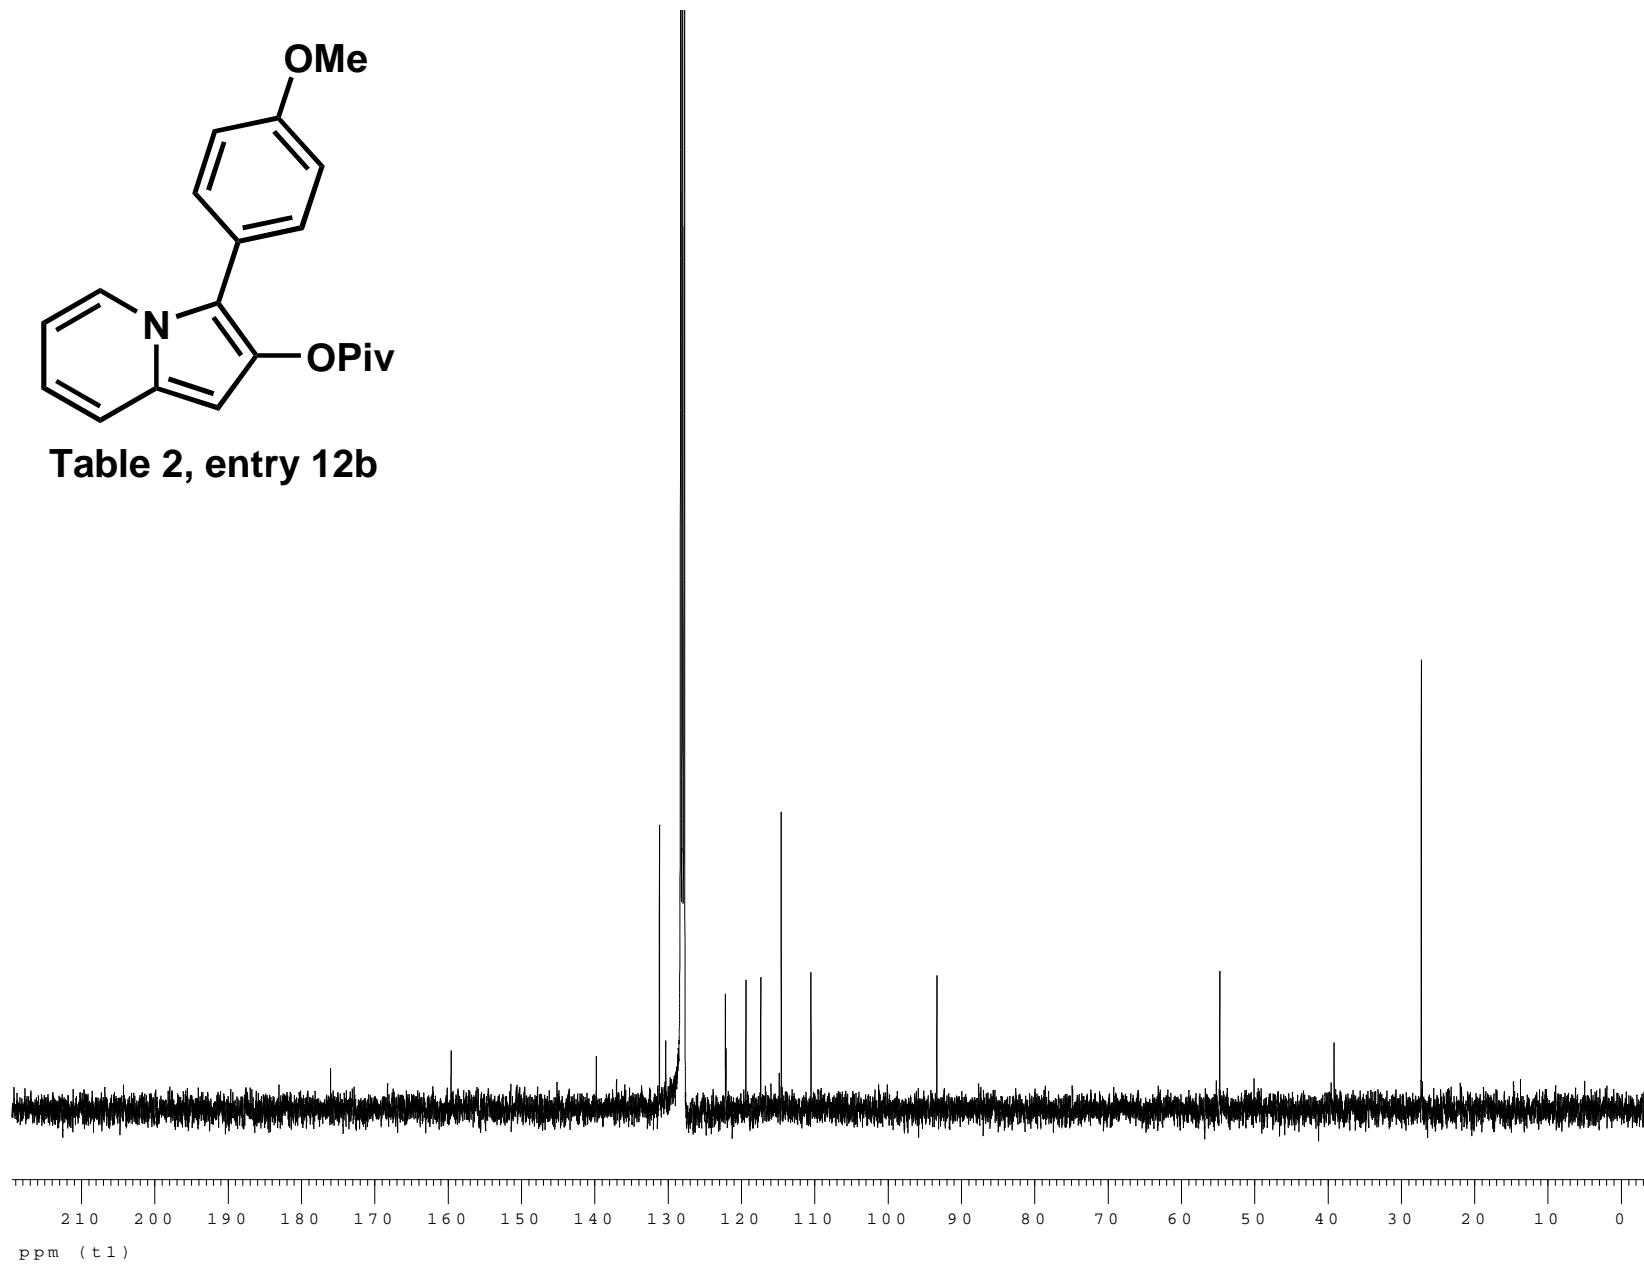

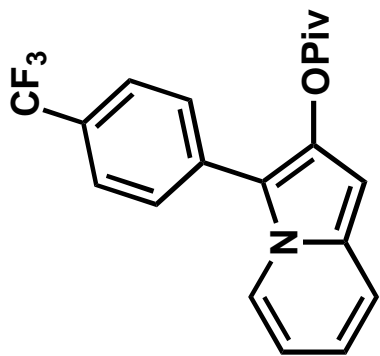

Table 2, entry 12c

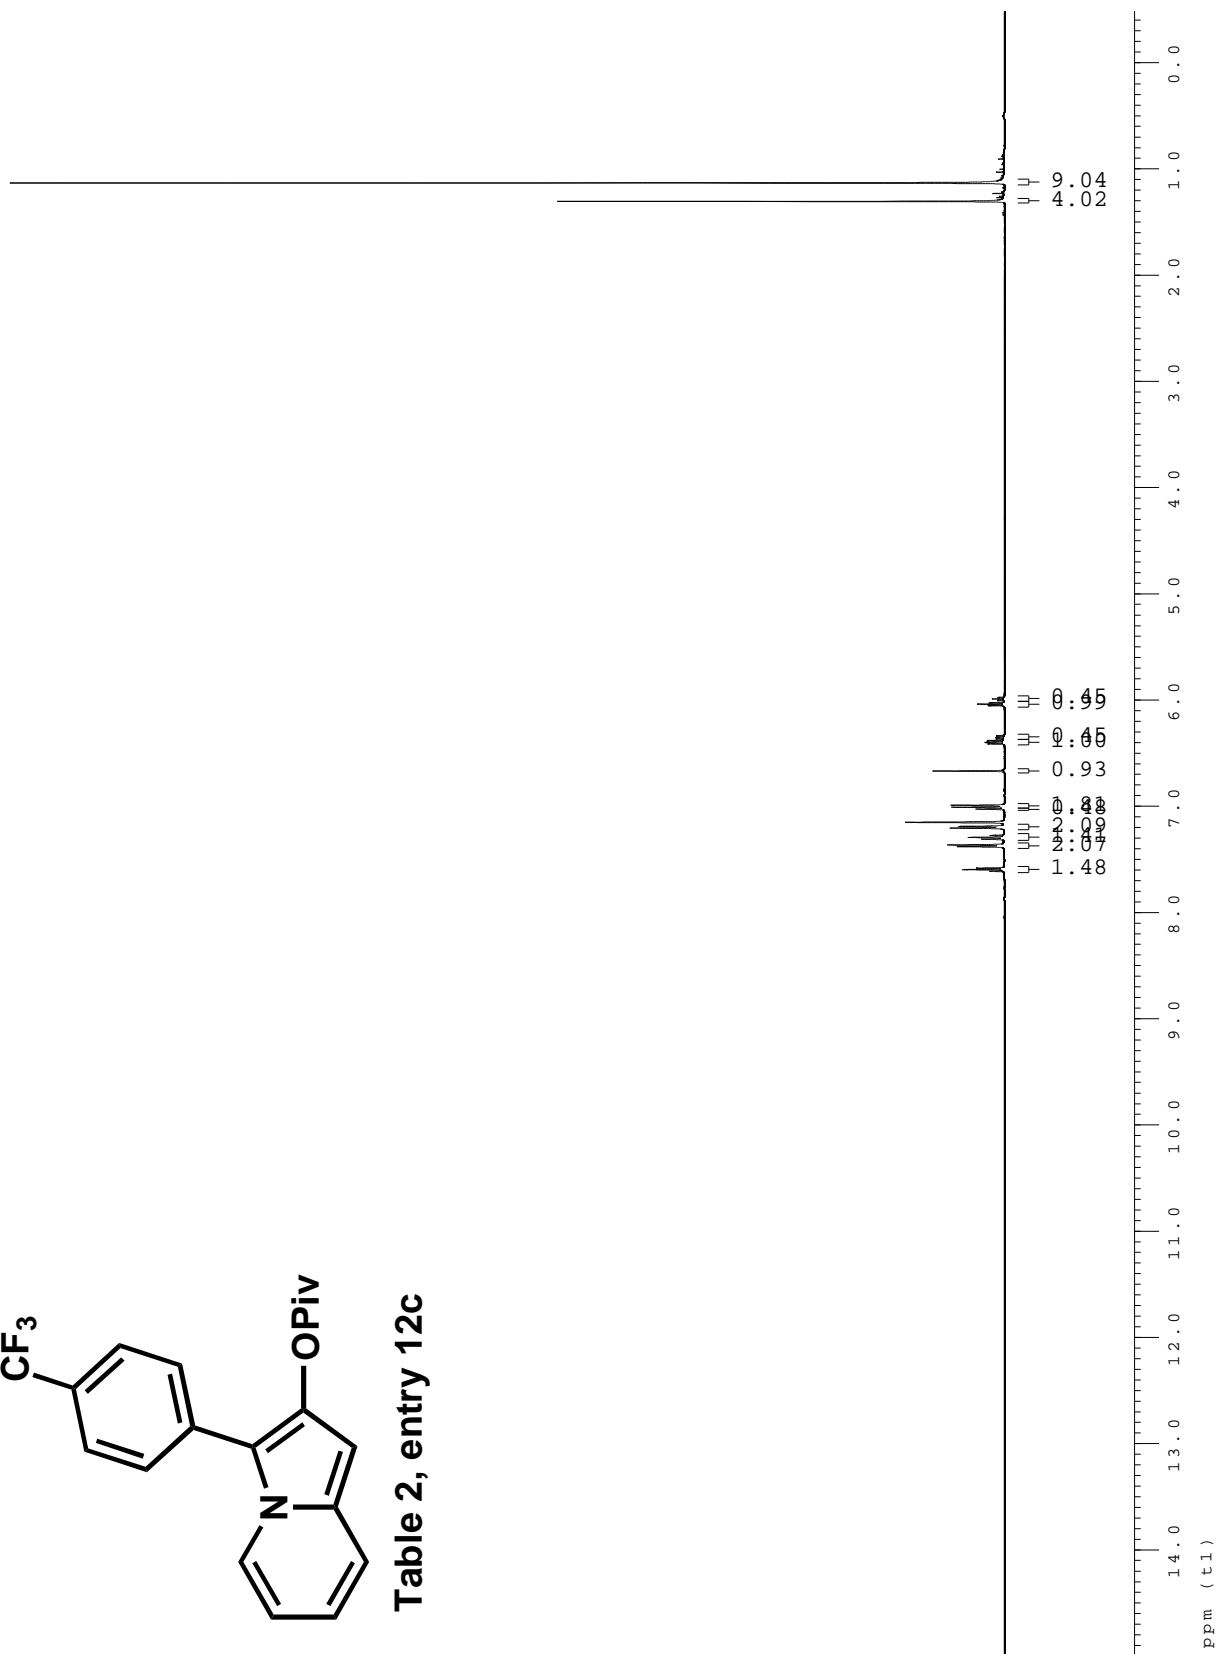

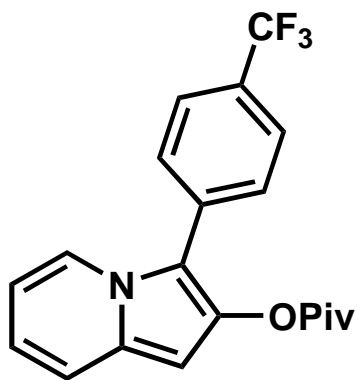

Table 2, entry 12c

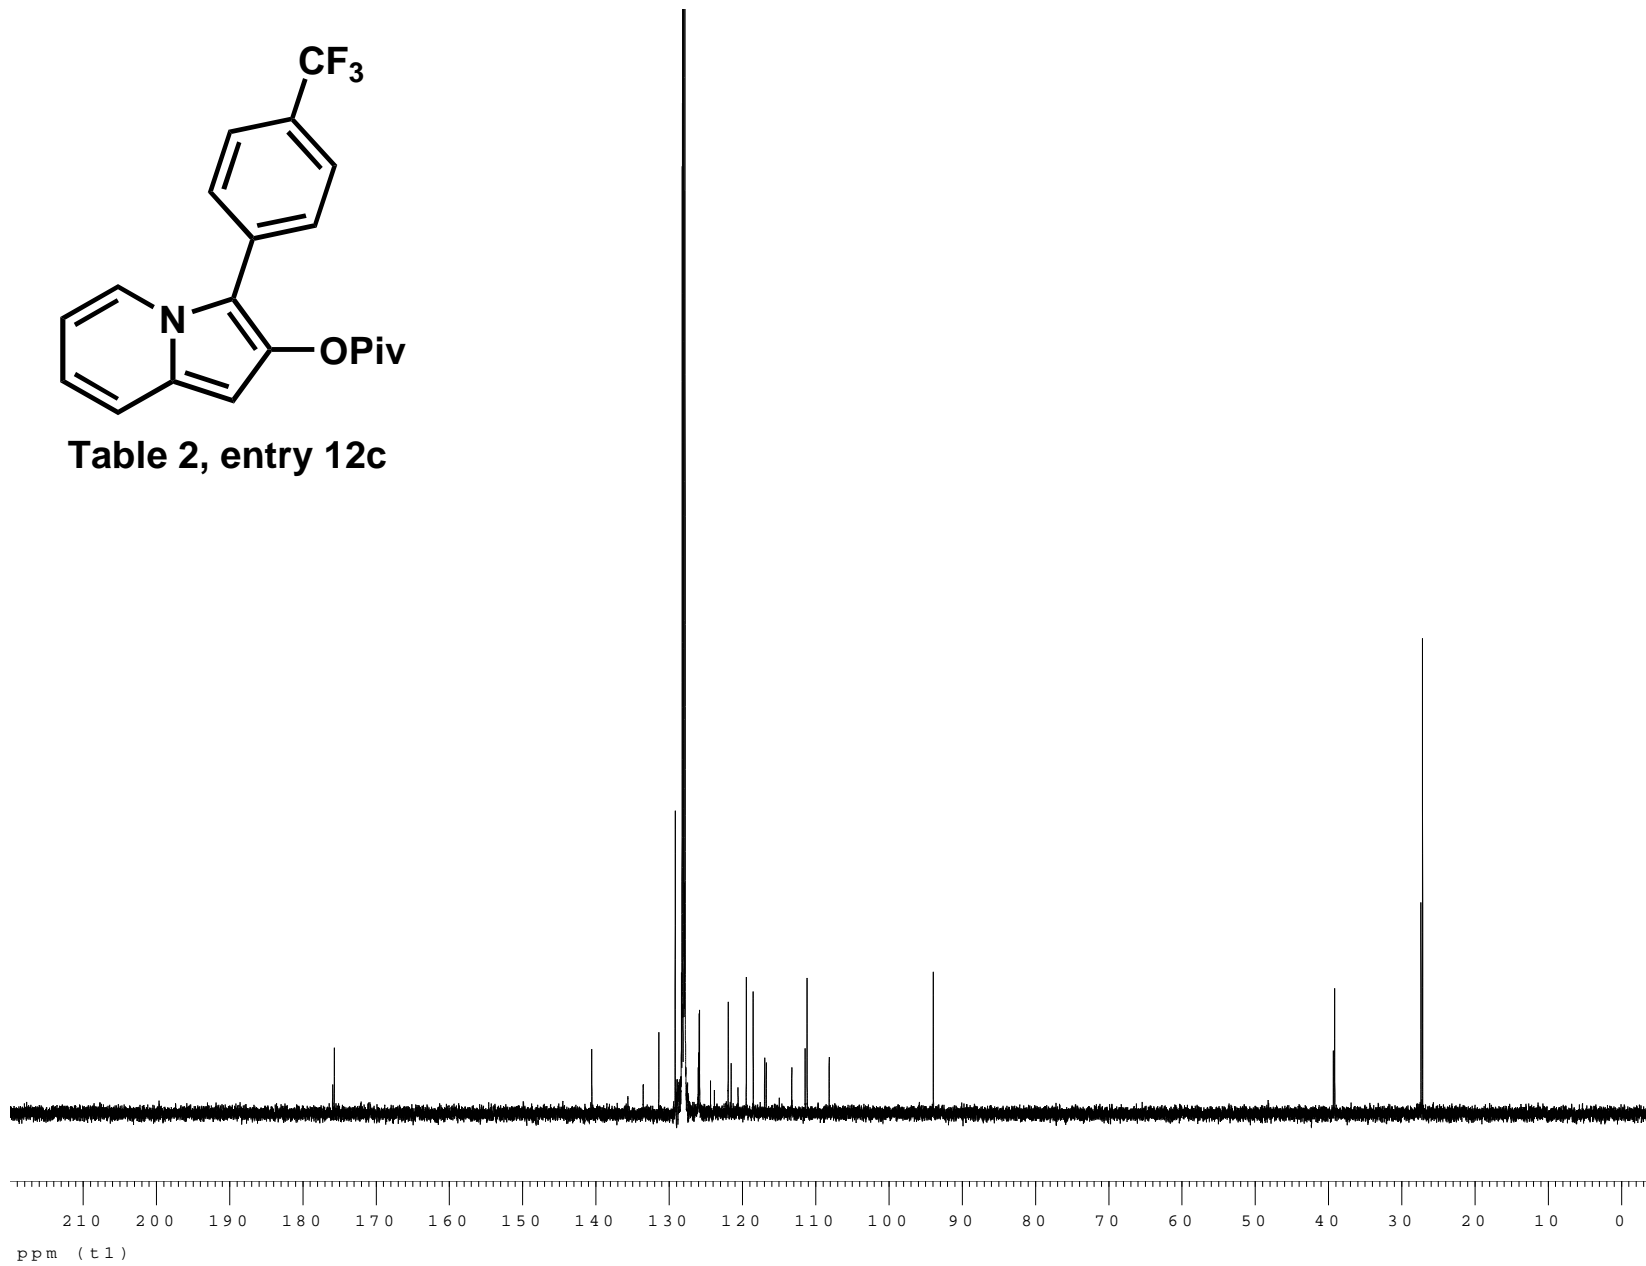

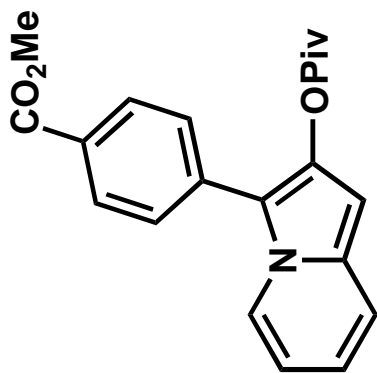

Table 2, entry 12d

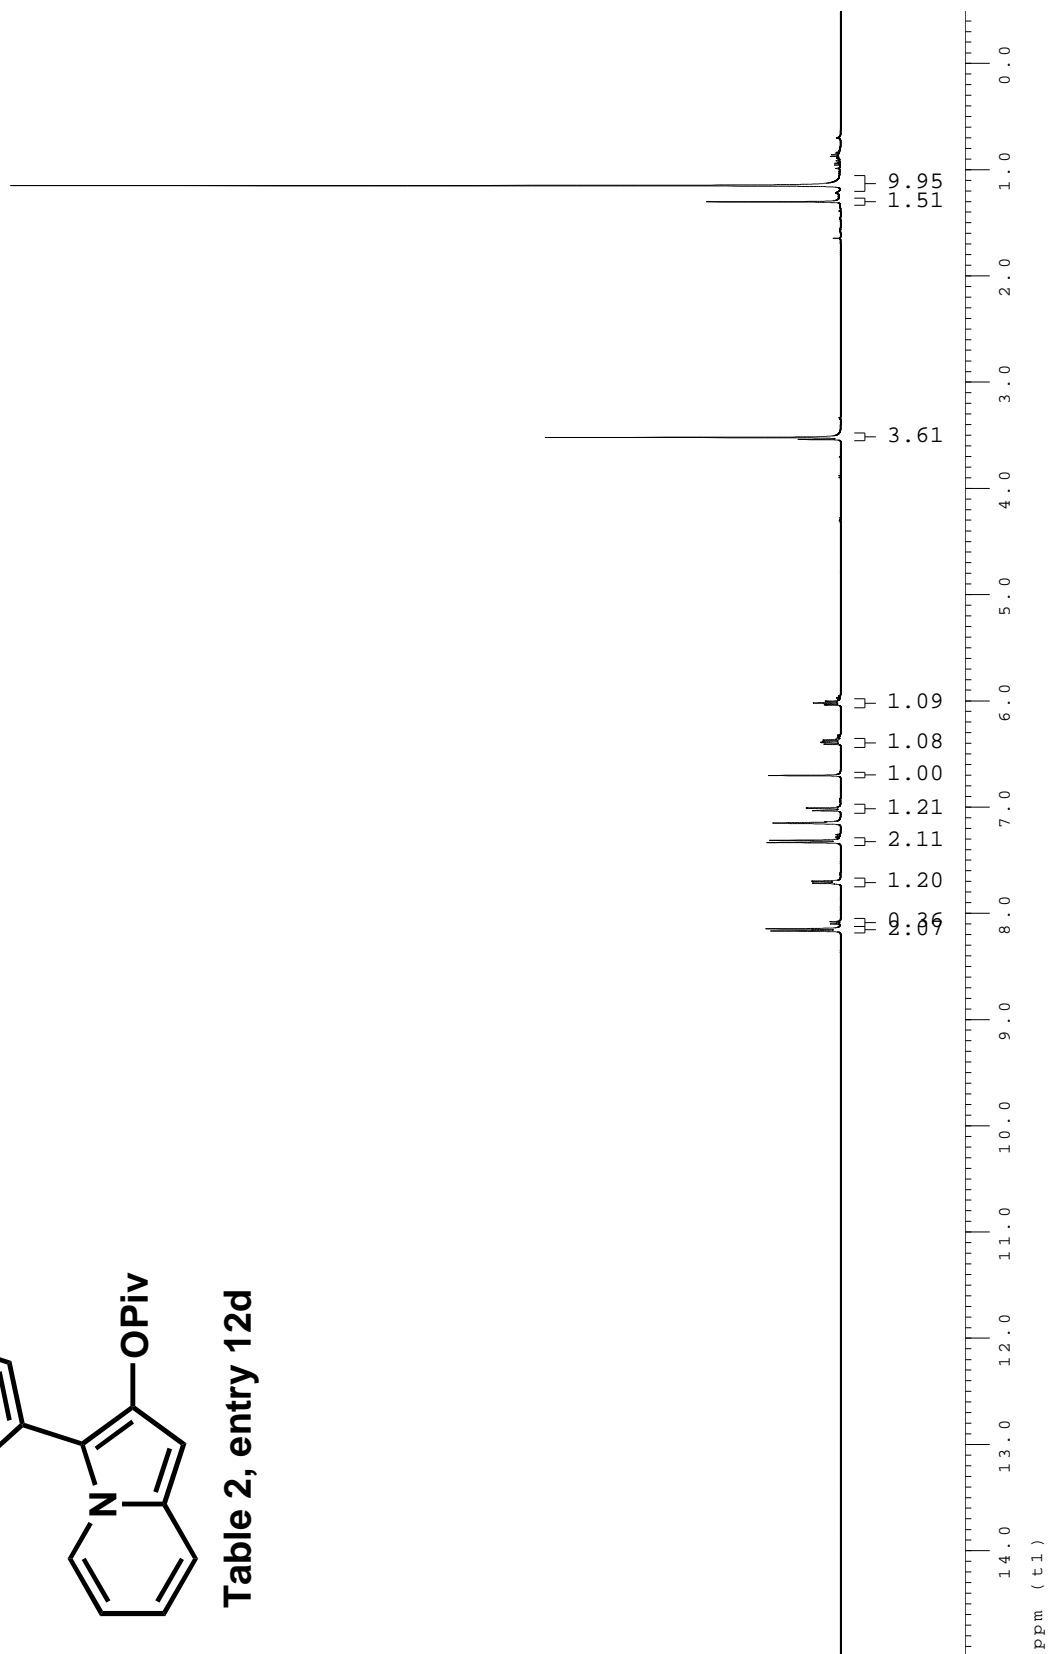

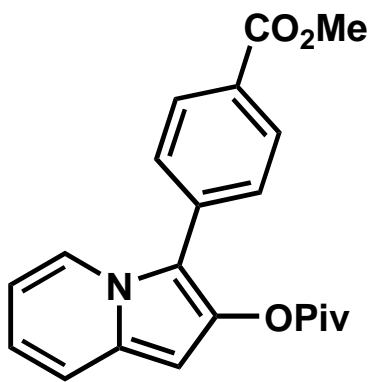

Table 2, entry 12d

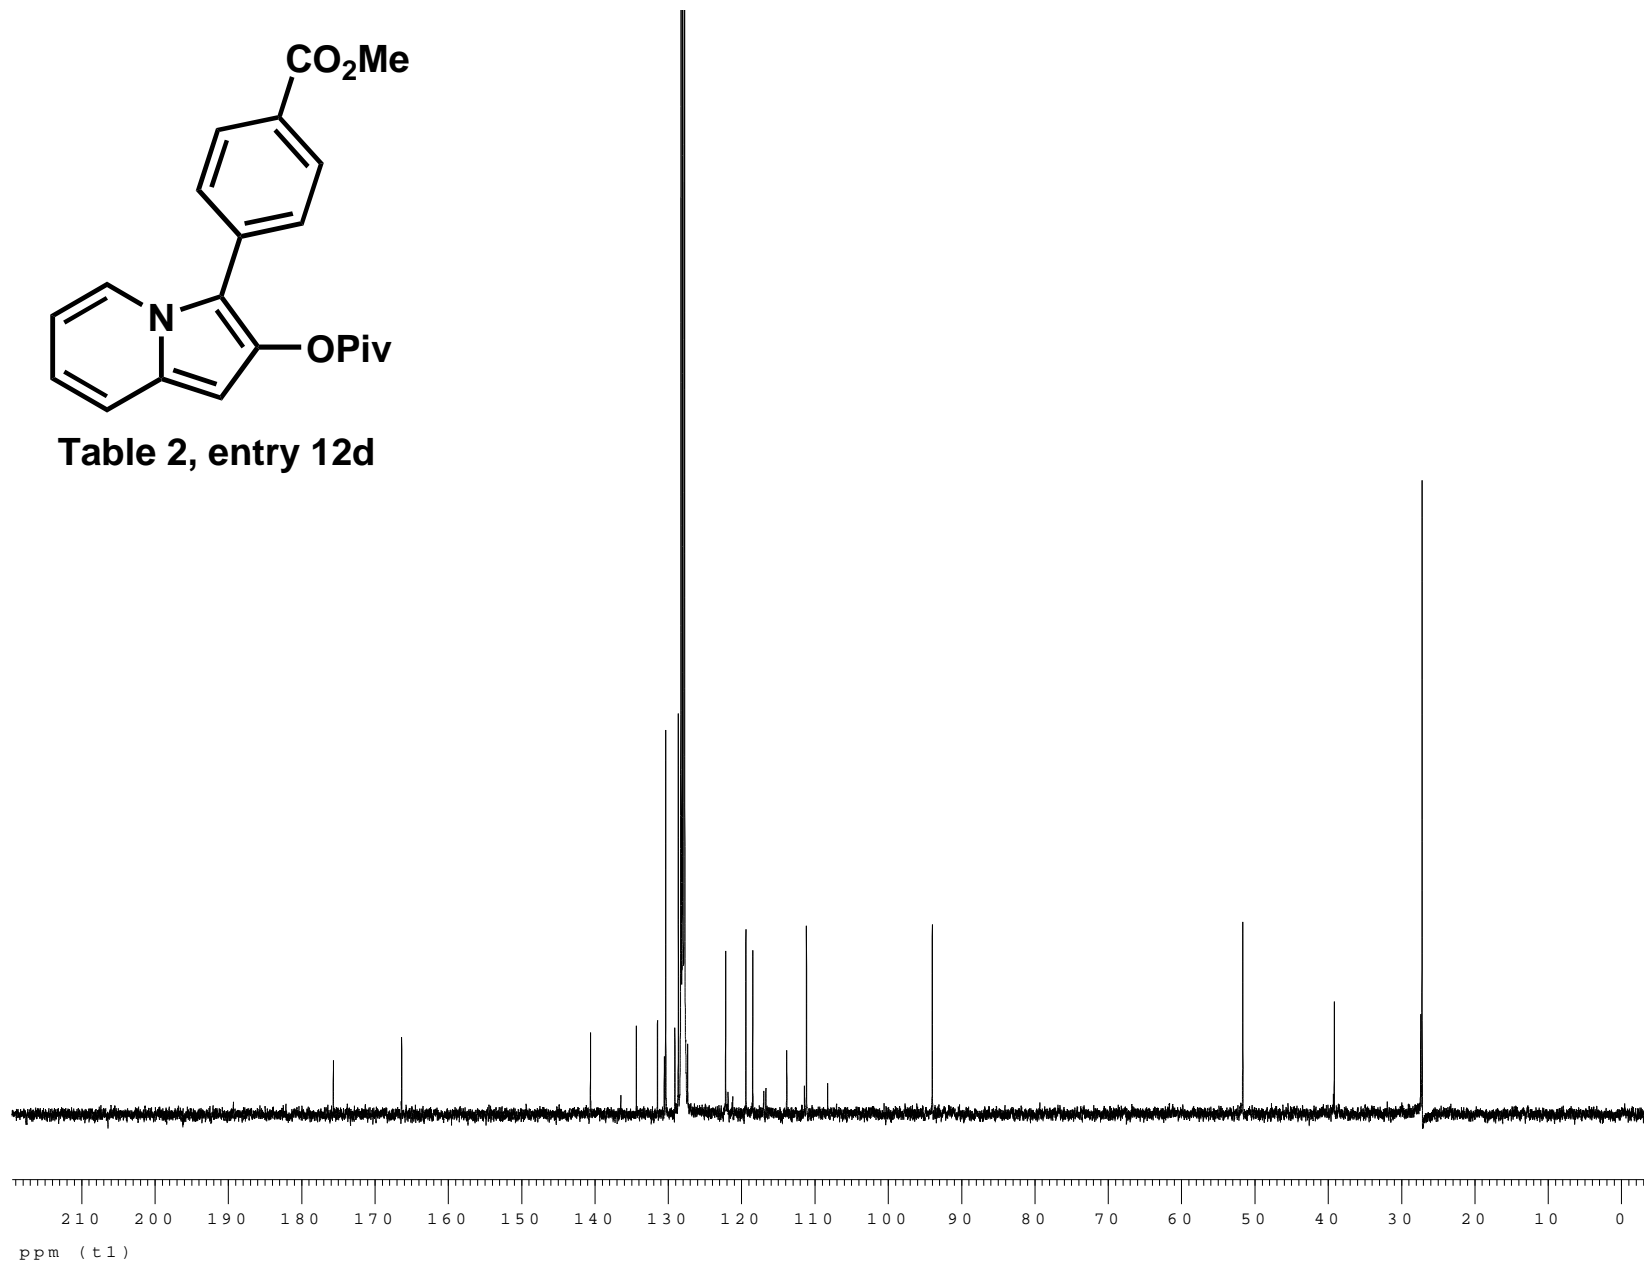

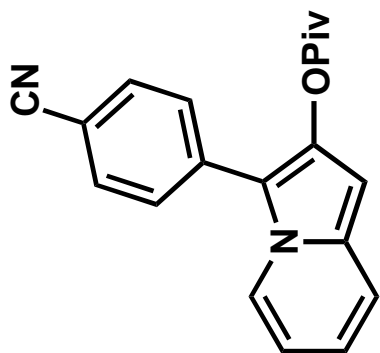

Table 2, entry 12e

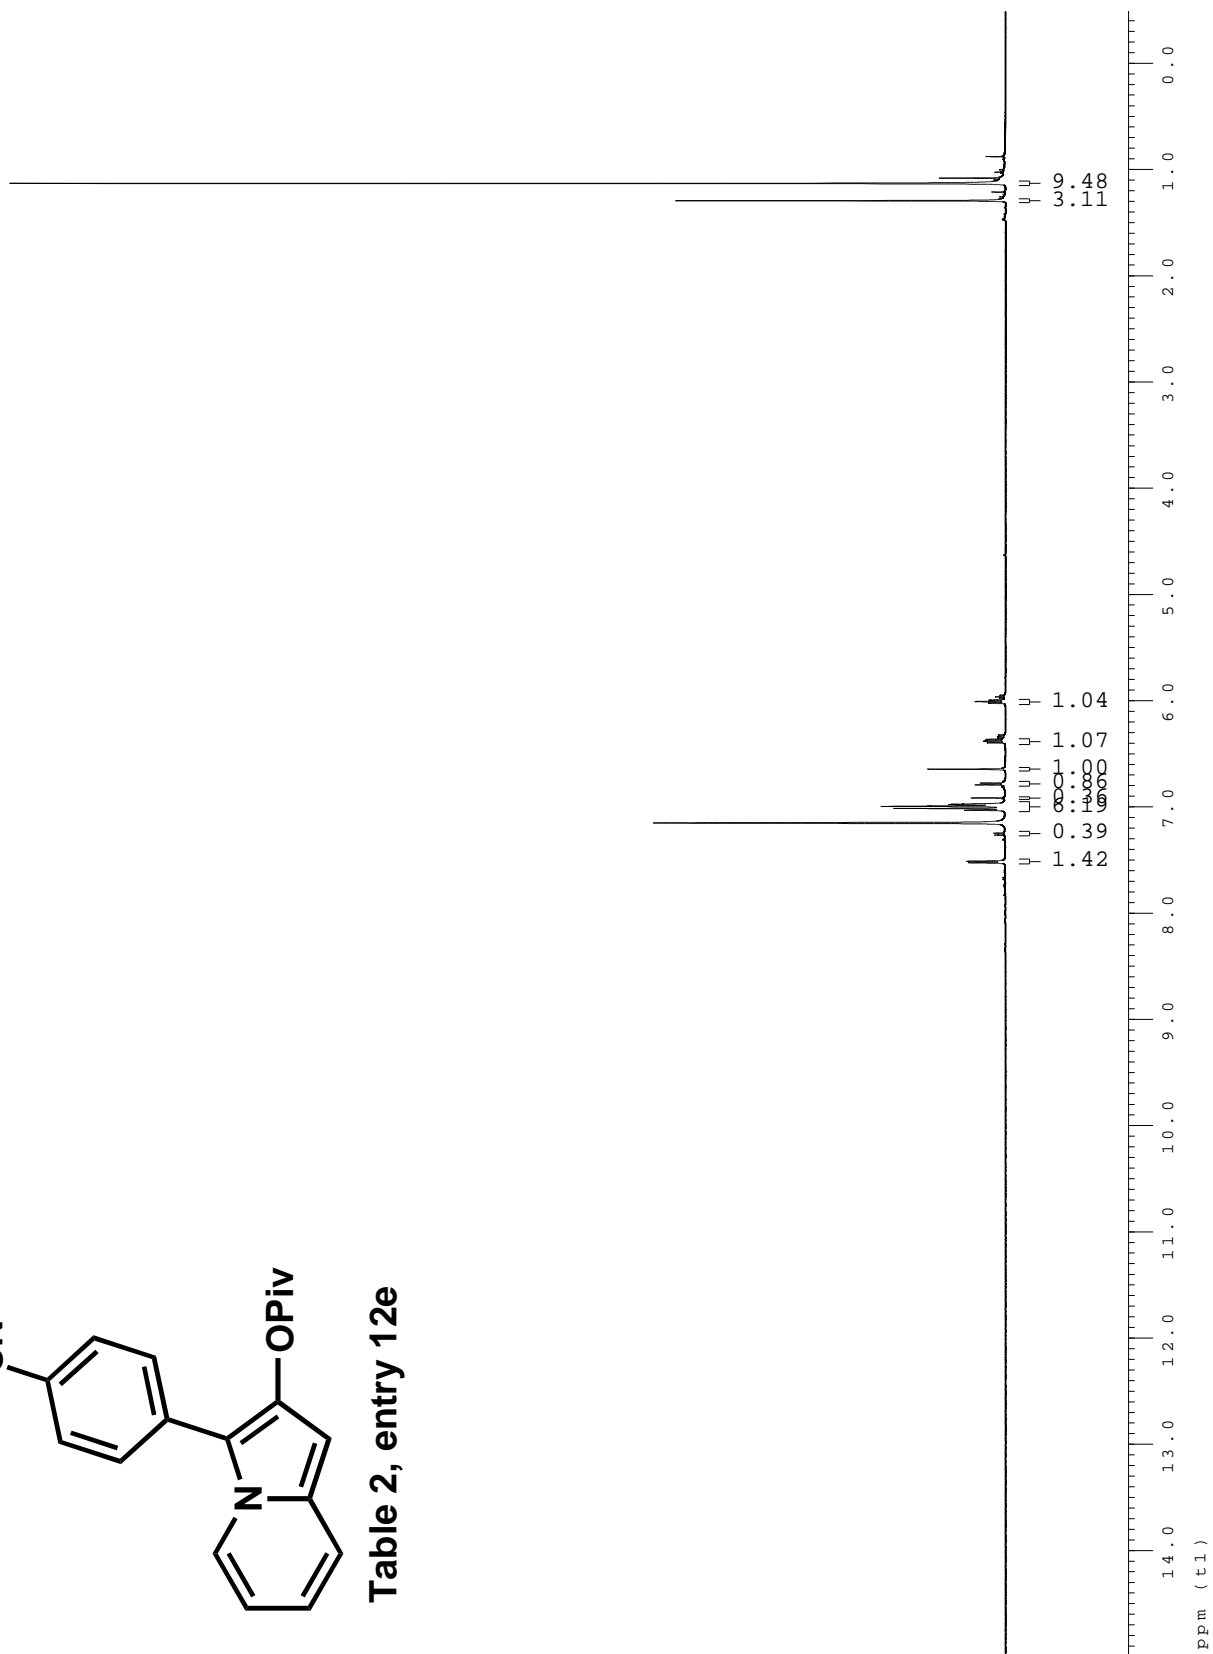



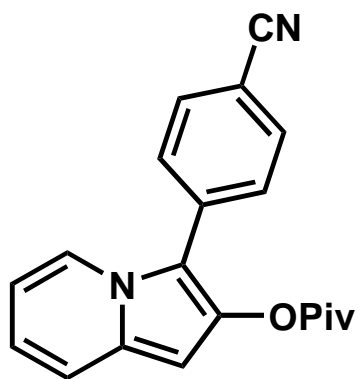

Table 2, entry 12e

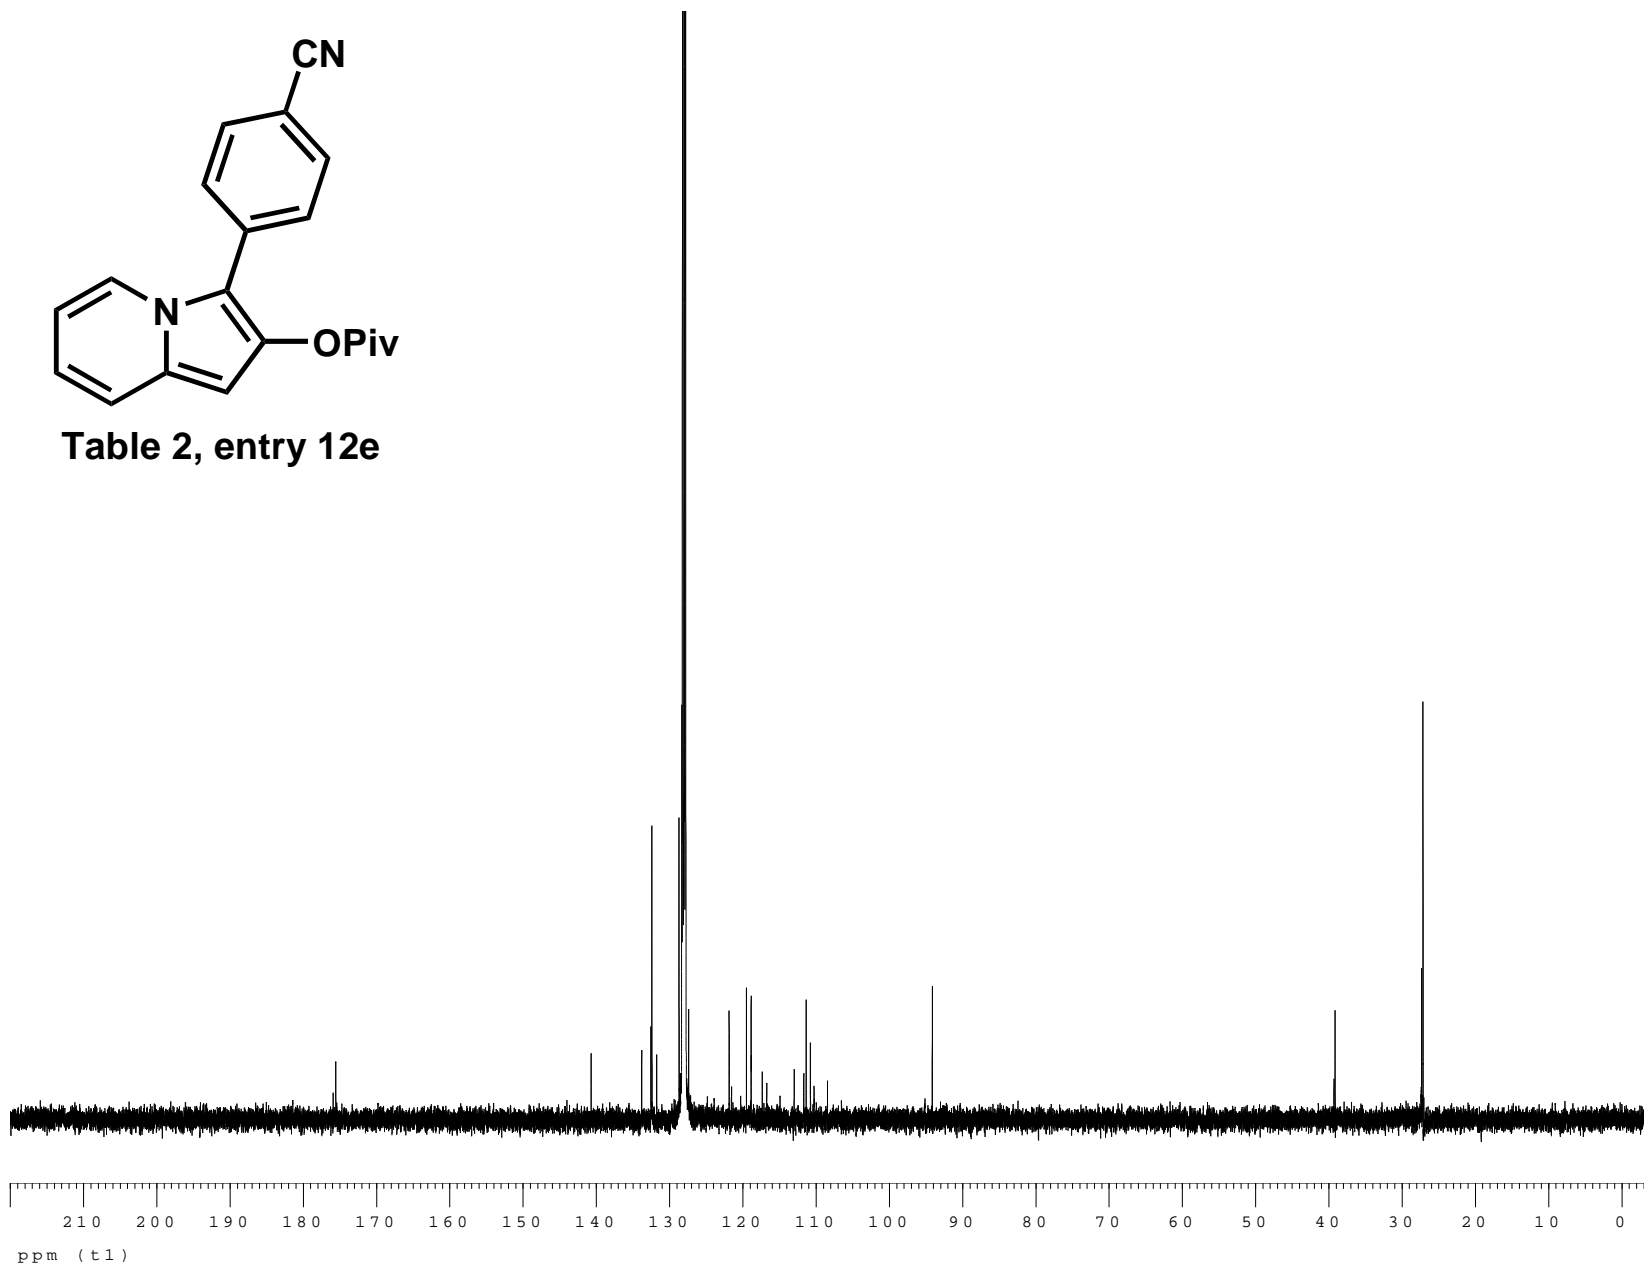

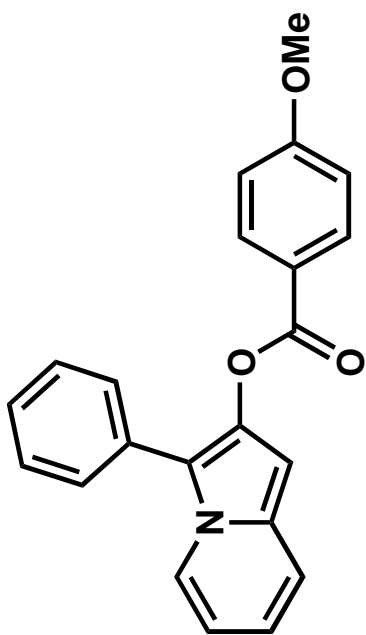

22b

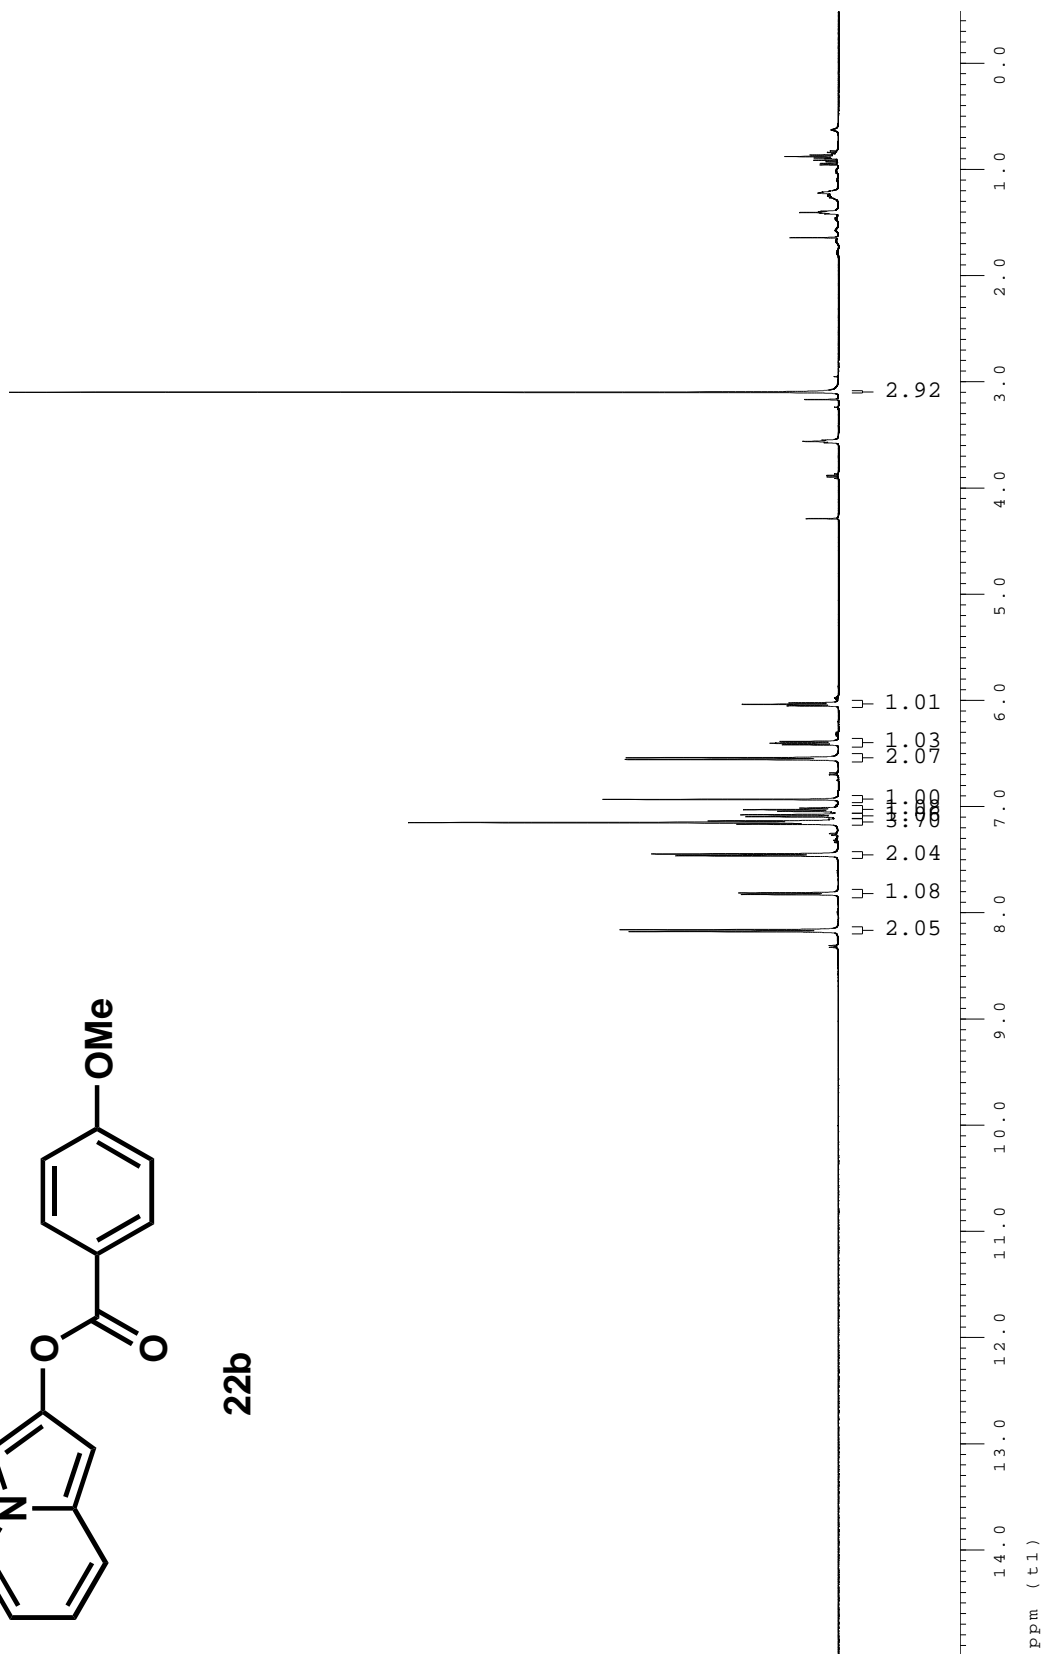

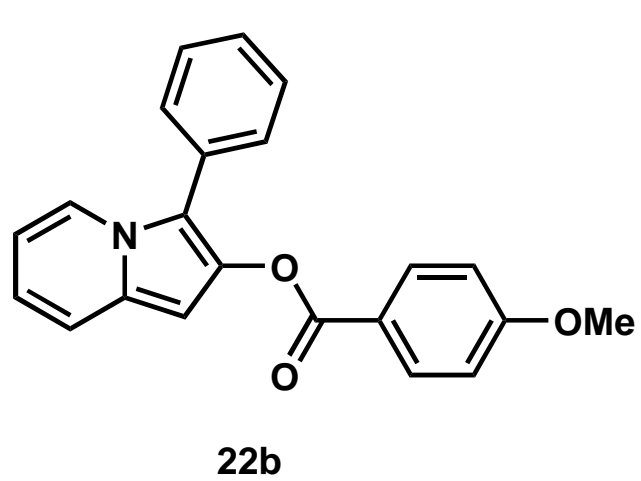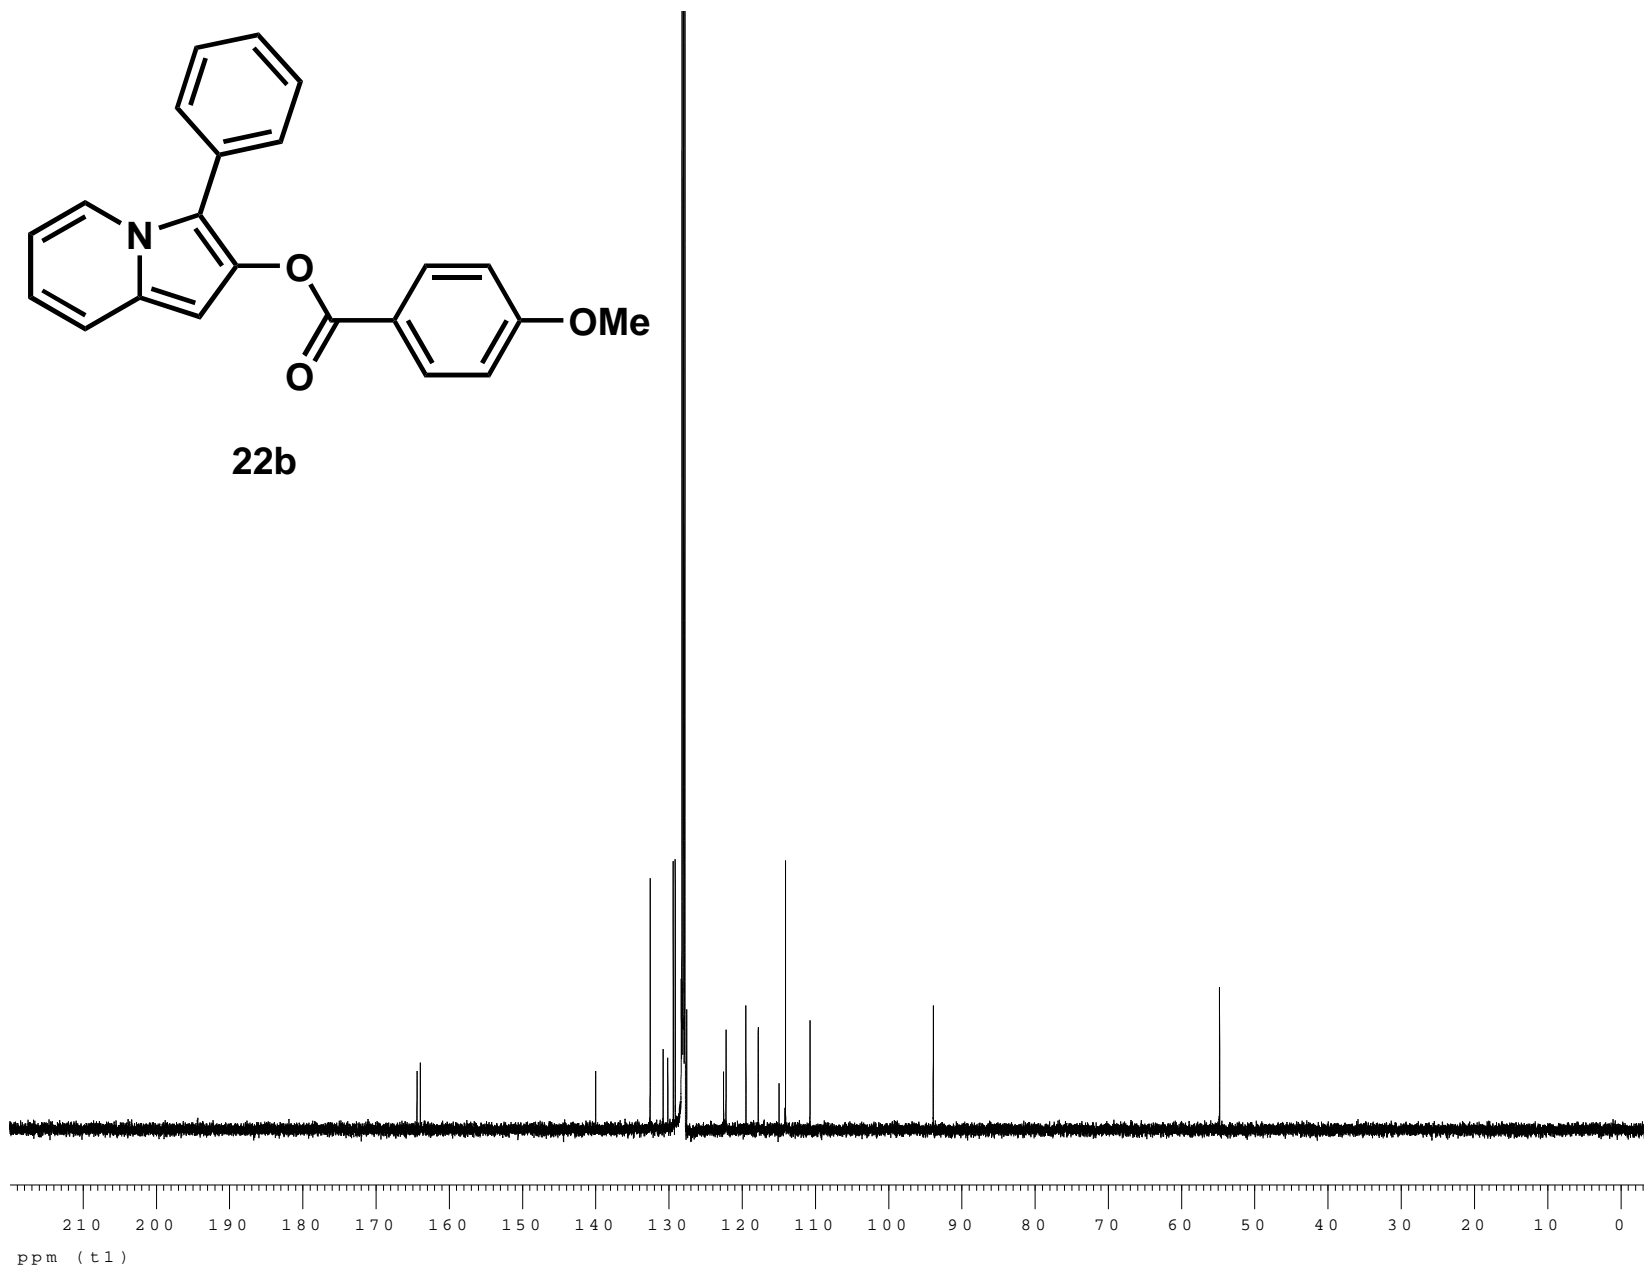

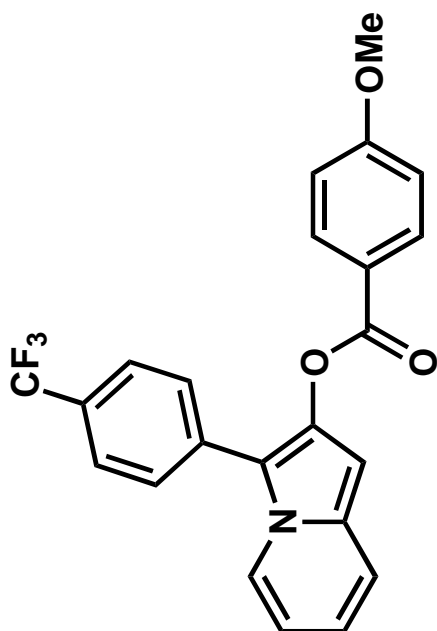

22d

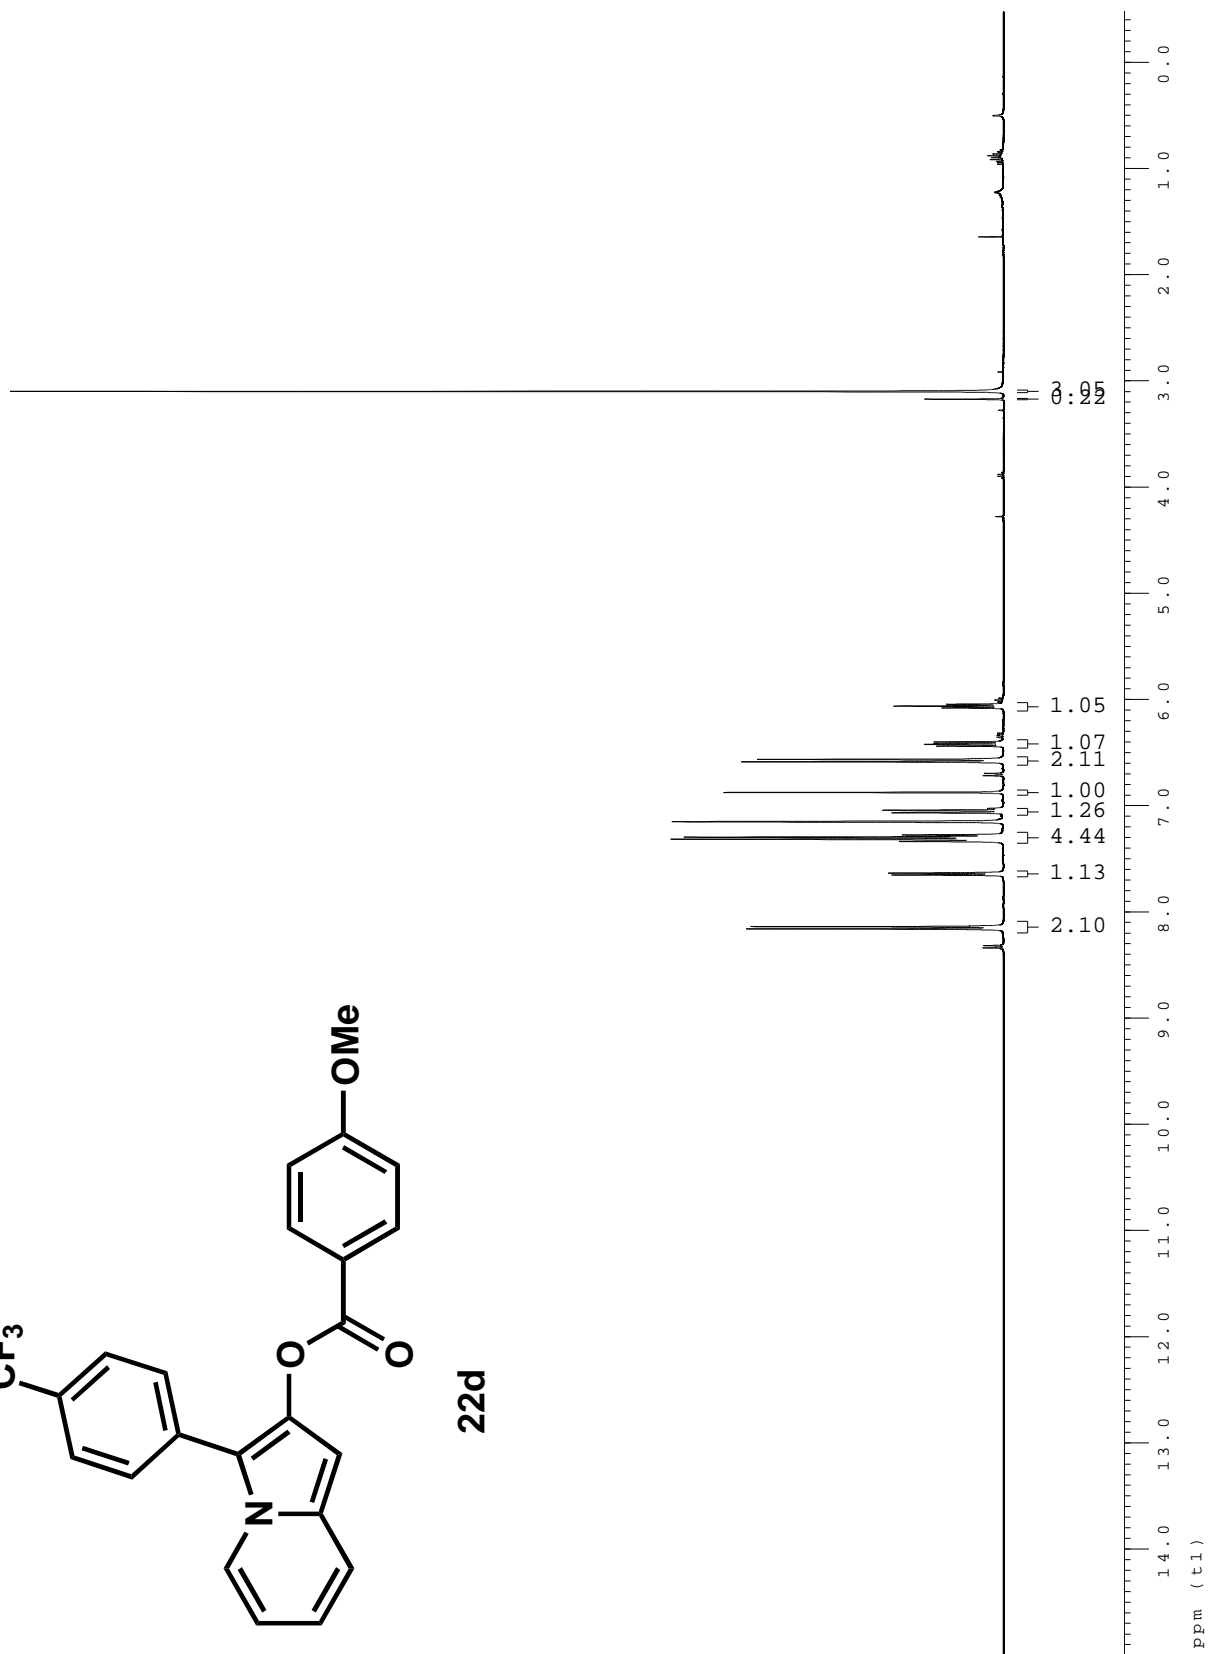

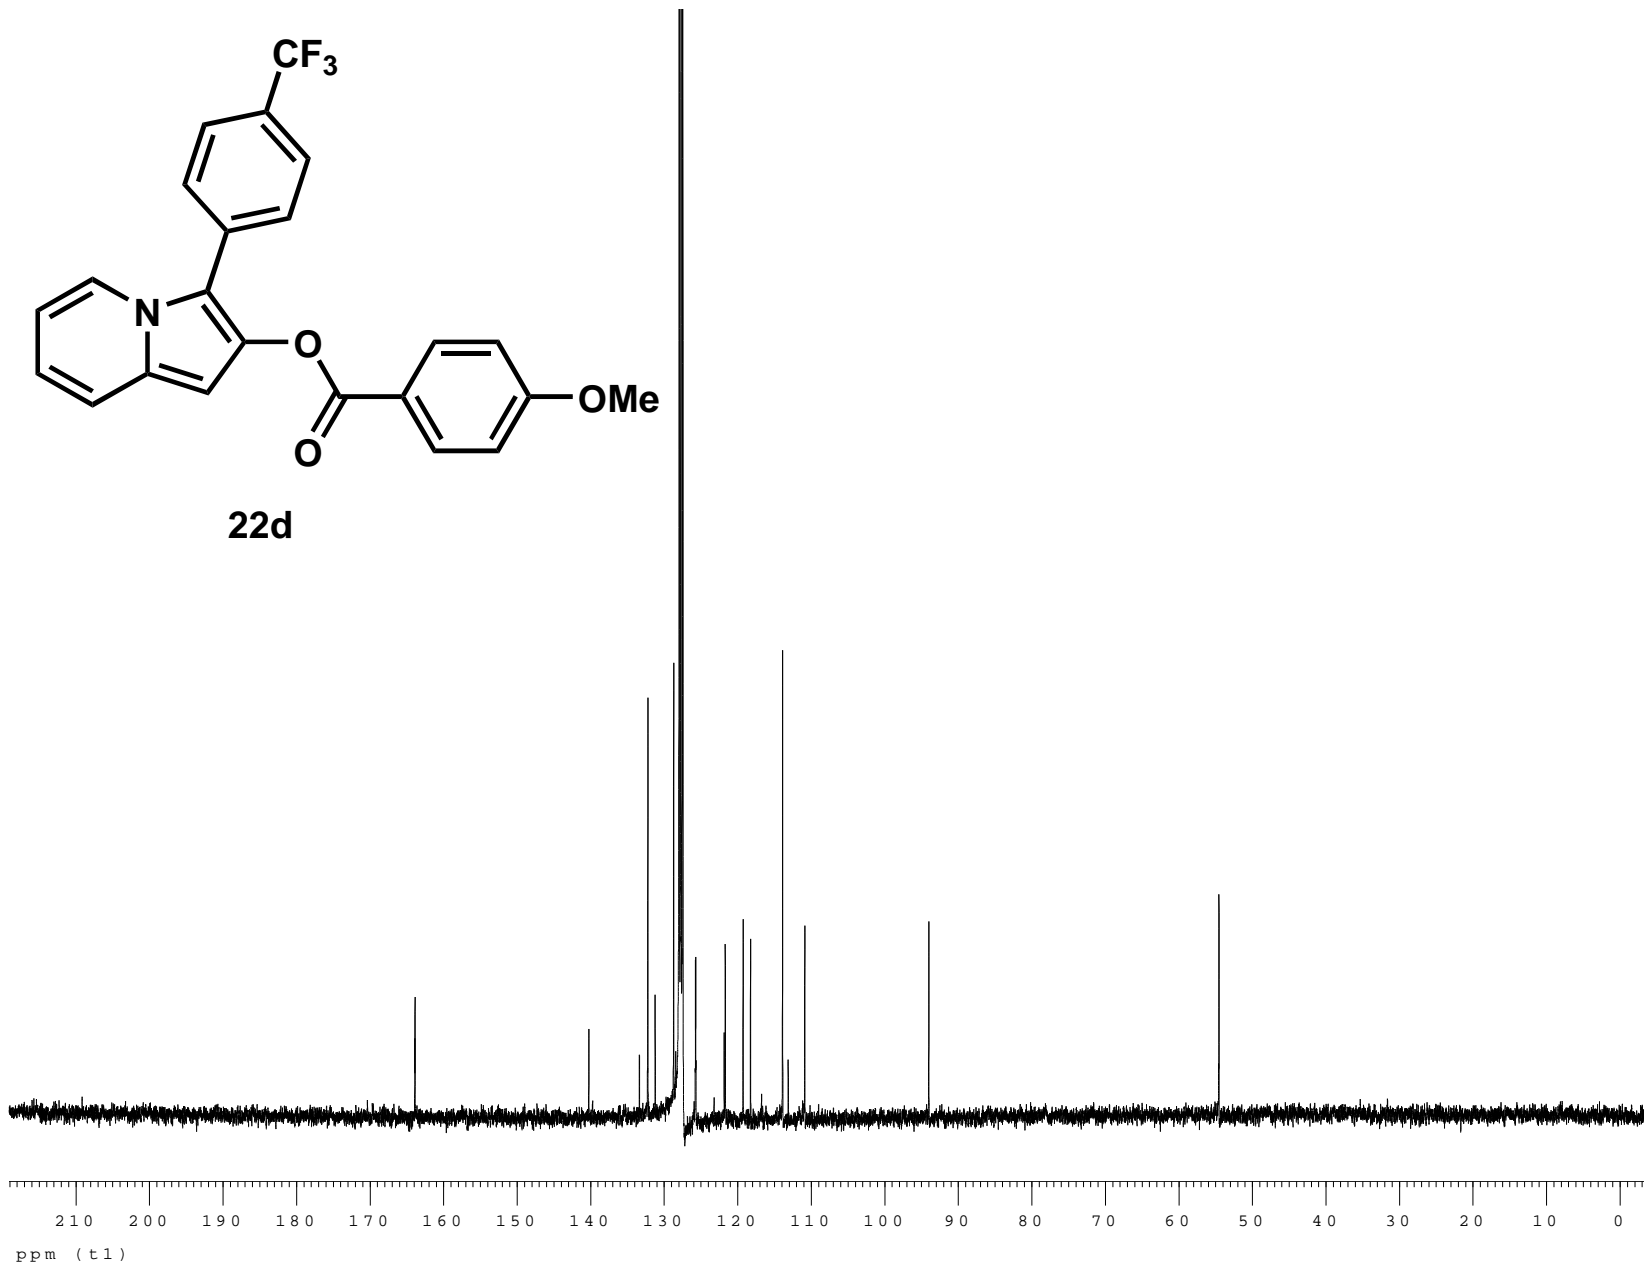

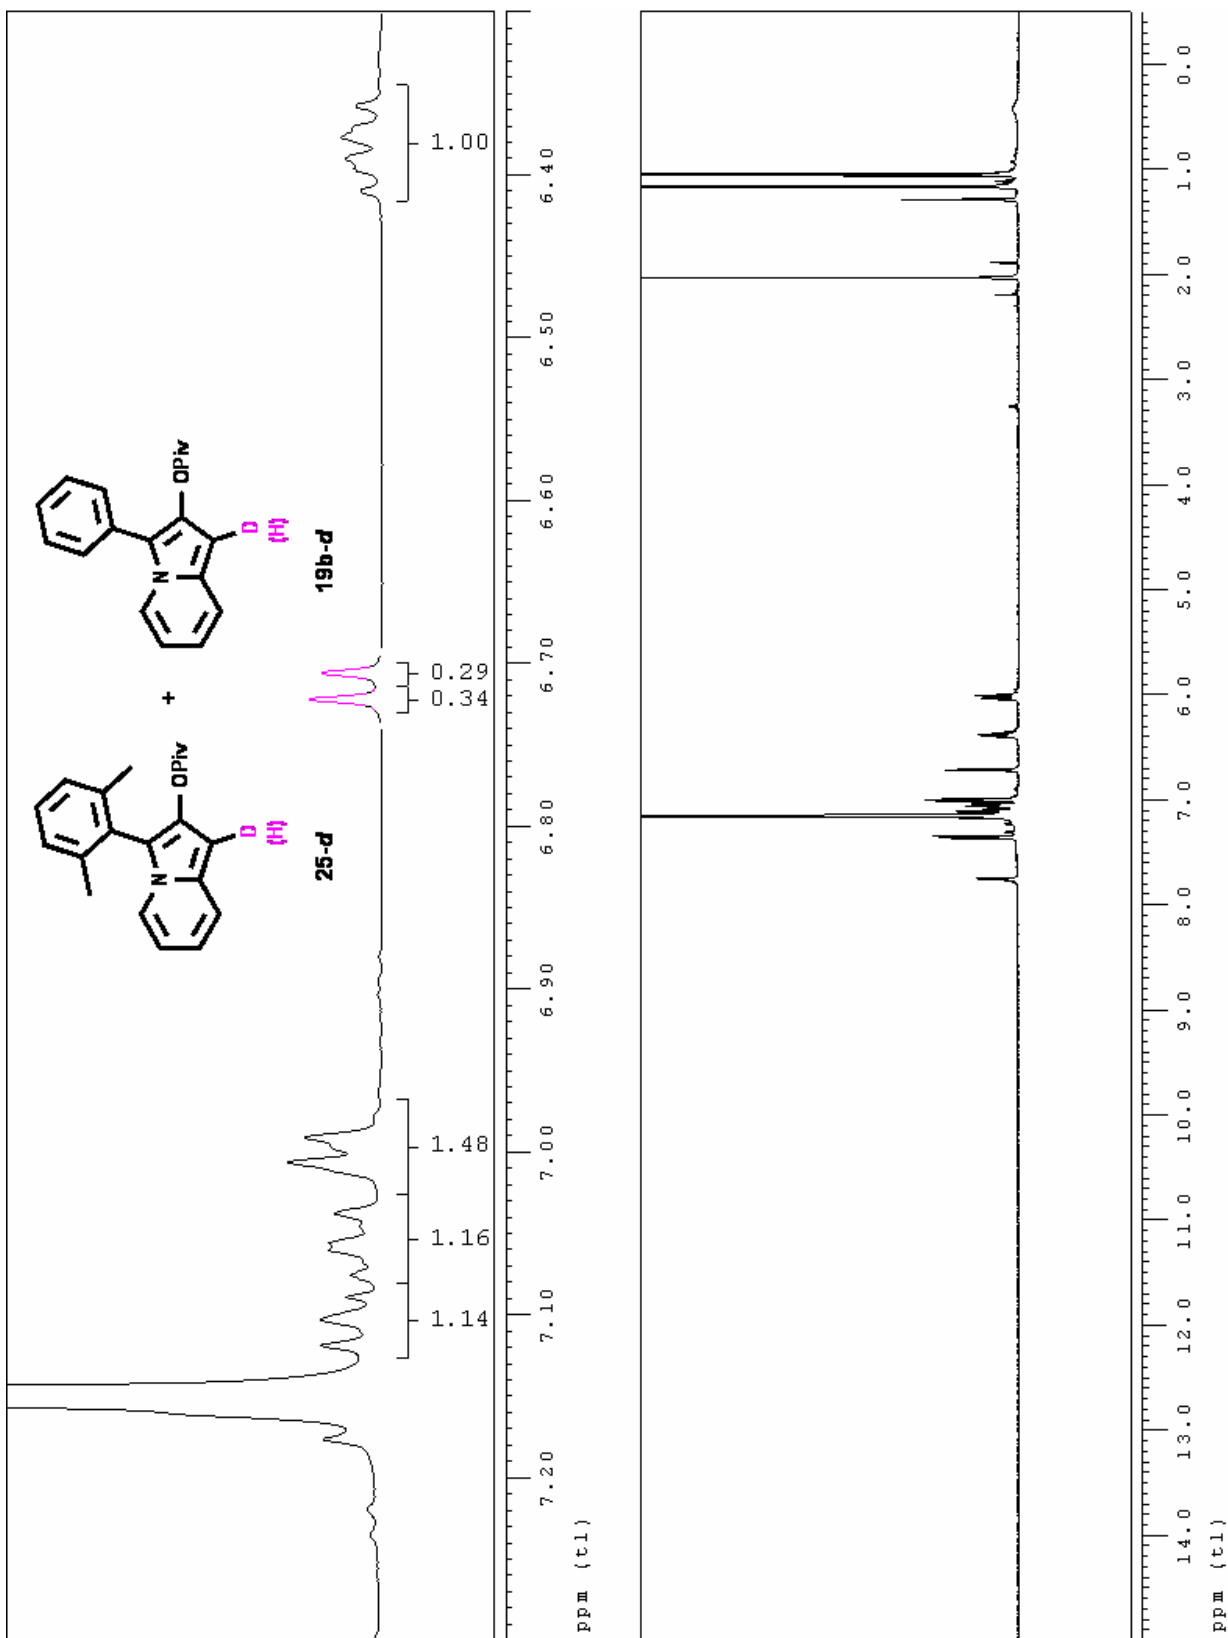

Supplement: NIHMS372102-supplement-Supplementary_Info.pdf [file NIHMS372102-supplement-Supplementary_Info.pdf]
